# Supplementary material for: The fossil bivalve Angulus benedeni benedeni: a potential seasonally resolved stable isotope-based climate archive to investigate Pliocene temperatures in the southern North Sea basin
Source: Copernicus journal article supplement (doi:10.5194/egusphere-2022-951), 2022-10-12
Supplement: Supplementary file 1 [file Clumped_isotopes_Benedeni_benedeni.xlsx]

## Sheet: All data
Date	SA/STD	Run	ID	Row	Sa m44 [mV]	Ref m44 [mV]	Sa m54 [mV]	Ref m54 [mV]	Weight [μg]	d13C [‰]	d13C SE [‰]	d18O( gas) [‰]	d18Occ [‰]	d18Occ SE [‰]	d45 [‰]	d45 SE [‰]	d46 [‰]	d46 SE [‰]	d48 [‰]	d48 SE [‰]	Δ48 [‰]	d49 [‰]	d49 SE [‰]	Δ49 [‰]	49 parameter [-]	d47 [‰]	d47 SE [‰]	Δ47 Raw [‰]	Δ47 Raw offset correction [‰]	D47 SD [‰]	Type	Accepted values [‰]	Offset correction	Average offset correction [‰]	Range offset correction before	Range offset correction after	Offset corrected all [‰]	Offset corrected STDs [‰]	ETF slope [-]	ETF intercept [-]	Final (70 degree AF) [‰]	Final AFF [‰]	Accepted d18O [‰]	Offset d18O [‰]	Offset Line 1 [‰]	Offset Line 2 [‰]	d18O correction range	d18O correction range	Final 18O Offset Line1 corrected [‰]
2021/05/27 11:54:02	ETH-2	461	STD	2	14239	14084.6	-116.604	-115.465	94	-10.6135	0.00179891	-10.5959	-19.1392	0.00292169	-7.50813	0.00175257	-5.96485	0.00296054	-12.3248	0.0628739	-0.435899	-19.1304	3.00735	0.472112	-0.0395885	-14.1686	0.0183177	-0.612544	-0.642239	0.109372	STD	0.2085	non ETH-3	0.812716	-1	3	0.200172	0.200172	1.03528	-0.0214829	0.18575	0.18575	-18.69	0.449167	line2	0.449167	-15	15
2021/05/27 12:30:52	ETH-1	461	STD	3	21944.9	22181.8	-160.972	-161.669	95	1.60824	0.00226202	6.00243	-2.68419	0.00368953	4.52038	0.00219976	10.7211	0.00373841	20.3777	0.0486743	-1.15458	-3.33201	2.9623	-28.6813	-0.00554973	14.7256	0.0200524	-0.519218	-0.479307	0.111939	STD	0.2052	non ETH-3	0.812716	-2	3	0.293498	0.293498	1.03528	-0.0214829	0.282369	0.282369	-2.19	0.494187	0.494187	line1	-15	15	-2.32875
2021/05/27 13:04:30	ETH-3	461	STD	4	15336.9	15168.8	-122.475	-121.407	93	1.33942	0.00198829	6.6675	-2.02486	0.00273066	4.29162	0.00191192	11.3881	0.00276678	21.8054	0.0660899	-1.07586	22.0117	3.07299	-5.03076	0.0444816	15.4701	0.0169732	-0.199516	-0.09	0.0990907	STD	0.6132	0.812716	0.78611	-3	3	0.586594	0.586594	1.03528	-0.0214829	0.585804	0.585804	-1.78	0.244864	line2	0.244864	-15	15
2021/05/27 14:53:59	ETH-3	461	STD	7	19549.3	19353.6	-146.19	-144.664	92	1.34769	0.00205877	6.67874	-2.01372	0.00299134	4.29977	0.00199862	11.3994	0.00303146	21.7241	0.0637153	-1.17764	17.5441	3.89667	-9.41076	0.0375161	15.5438	0.0177812	-0.146303	-0.09	0.102085	STD	0.6132	0.759503	0.773115	-3	3	0.626812	0.626812	1.03528	-0.0214829	0.62744	0.62744	-1.78	0.23372	0.23372	line1	-15	15	-1.64657
2021/05/27 16:41:35	ETH-3	461	STD	10	18196.2	18288.3	-137.747	-138.208	92	1.31876	0.0017226	6.64333	-2.04883	0.00206682	4.27142	0.00163262	11.3638	0.00209345	21.8614	0.0547769	-0.973075	26.209	3.11321	-0.875835	0.057595	15.4917	0.0176089	-0.133926	-0.09	0.108633	STD	0.6132	0.747126	0.747318	-3	3	0.613393	0.613393	1.03528	-0.0214829	0.613548	0.613548	-1.78	0.268829	line2	0.268829	-15	15
2021/05/27 17:56:06	ETH-1	461	STD	12	20875.9	20881.9	-153.348	-152.01	90	1.56932	0.00273446	5.88764	-2.79798	0.00381293	4.47993	0.00266406	10.6058	0.00386481	20.2809	0.0506069	-1.02144	14.6855	2.87043	-10.8579	0.0330052	14.5654	0.0180679	-0.523379	-0.48732	0.0992619	STD	0.2052	non ETH-3	0.741226	-3	3	0.217847	0.217847	1.03528	-0.0214829	0.204049	0.204049	-2.19	0.607985	line2	0.607985	-15	15
2021/05/27 18:31:16	ETH-3	461	STD	13	20948.6	21110.2	-152.799	-153.155	91	1.32674	0.00197206	6.57313	-2.11842	0.00231258	4.27646	0.00189438	11.2934	0.00234376	21.6527	0.0547223	-1.03793	18.481	2.33915	-8.26941	0.0417275	15.4394	0.0159818	-0.122126	-0.09	0.091172	STD	0.6132	0.735326	0.752507	-3	3	0.630381	0.630381	1.03528	-0.0214829	0.631135	0.631135	-1.78	0.338416	0.338416	line1	-15	15	-1.77598
2021/05/27 20:19:46	ETH-3	461	STD	16	20485.7	20644.2	-150.551	-150.477	94	1.37137	0.00248128	6.69501	-1.99759	0.00277633	4.32251	0.00239199	11.4158	0.00281451	21.9525	0.0582199	-0.986693	22.7355	3.00829	-4.41248	0.051138	15.5679	0.0216892	-0.161869	-0.09	0.12369	STD	0.6132	0.775069	0.773582	-3	3	0.611713	0.611713	1.03528	-0.0214829	0.611809	0.611809	-1.78	0.217589	line2	0.217589	-15	15
2021/05/27 22:05:30	ETH-3	461	STD	19	19672.4	19602.6	-145.631	-145.541	91	1.3594	0.00205967	6.63632	-2.05577	0.0030954	4.30926	0.00201573	11.3569	0.0031374	21.7536	0.0432357	-1.06469	17.63	3.60907	-9.25531	0.0396631	15.4601	0.0210804	-0.19715	-0.09	0.118314	STD	0.6132	0.81035	0.787315	-3	3	0.590166	0.590166	1.03528	-0.0214829	0.589502	0.589502	-1.78	0.275771	0.275771	line1	-15	15	-1.78764
2021/05/27 23:19:36	ETH-2	461	STD	21	19709.8	19556	-145.958	-145.037	90	-10.5826	0.00303007	-10.6408	-19.1837	0.00335859	-7.48075	0.00292625	-6.00983	0.00340515	-12.6985	0.056114	-0.72368	-7.7735	3.75836	12.1155	-0.01692	-14.1407	0.0206349	-0.568304	-0.483702	0.10967	STD	0.2085	non ETH-3	0.793439	-3	3	0.225135	0.225135	1.03528	-0.0214829	0.211594	0.211594	-18.69	0.493662	0.493662	line1	-15	15	-18.9214
2021/05/27 23:55:27	ETH-3	461	STD	22	20743.1	20925	-151.787	-152.008	94	1.34207	0.00208939	6.68238	-2.01011	0.00269767	4.29463	0.00200176	11.403	0.00273329	21.7541	0.0525569	-1.15549	11.2506	2.95194	-15.5389	0.0258517	15.5248	0.0174365	-0.163327	-0.09	0.0989069	STD	0.6132	0.776527	0.798285	-3	3	0.634958	0.634958	1.03528	-0.0214829	0.635874	0.635874	-1.78	0.230115	line2	0.230115	-15	15
2021/05/28 01:41:43	ETH-3	461	STD	25	22013.9	22293.6	-158.598	-159.082	98	1.35011	0.00193162	6.69374	-1.99885	0.00260676	4.30255	0.0018707	11.4145	0.00264192	22.0474	0.0596182	-0.891352	10.6961	2.59421	-16.1088	0.025198	15.5124	0.0179188	-0.194779	-0.09	0.107075	STD	0.6132	0.807979	0.7853	-3	3	0.590521	0.590521	1.03528	-0.0214829	0.58987	0.58987	-1.78	0.218846	0.218846	line1	-15	15	-1.71482
2021/05/28 03:31:38	ETH-3	461	STD	28	20653	20747.6	-150.809	-150.75	93	1.29909	0.00241457	6.61718	-2.07474	0.00237187	4.25208	0.00231048	11.3375	0.00240433	21.7969	0.0636528	-0.984179	14.7979	2.49231	-11.915	0.0339292	15.4209	0.0181696	-0.158195	-0.09	0.0989826	STD	0.6132	0.771395	0.783597	-3	3	0.625402	0.625402	1.03528	-0.0214829	0.625981	0.625981	-1.78	0.294744	line2	0.294744	-15	15
2021/05/28 05:22:41	ETH-3	461	STD	31	20771.2	20719.9	-151.382	-150.862	92	1.42079	0.00228477	6.86573	-1.82835	0.00327127	4.37476	0.00222921	11.5872	0.00331573	22.2952	0.0682138	-0.990395	19.7479	3.02702	-7.70641	0.0451628	15.7954	0.0158029	-0.158216	-0.09	0.0859757	STD	0.6132	0.771416	0.776595	-3	3	0.618379	0.618379	1.03528	-0.0214829	0.61871	0.61871	-1.78	0.0483467	0.0483467	line1	-15	15	-1.55605
2021/05/28 07:10:06	ETH-3	461	STD	34	19996.1	20078.8	-147.538	-147.295	90	1.28128	0.00208018	6.57024	-2.12128	0.00256707	4.23377	0.00201393	11.2904	0.0026022	21.6153	0.0459394	-1.06855	13.3619	2.52584	-13.2038	0.0305823	15.3394	0.0177843	-0.173774	-0.09	0.104412	STD	0.6132	0.786974	0.779195	-3	1	0.605421	0.605421	1.03528	-0.0214829	0.605295	0.605295	-1.78	0.341285	line2	0.341285	-15	15
2021/05/28 16:28:58	ETH-3	462	STD	1	21345.3	21597.4	-155.631	-157.401	96	1.35058	0.00319693	6.68572	-2.0068	0.00512578	4.30271	0.00316095	11.4064	0.00519588	21.9708	0.0583162	-0.950325	19.711	4.89931	-7.31933	0.0454355	15.578	0.027561	-0.122459	-0.09	0.132974	STD	0.6132	0.735659	0.805897	0	3	0.683438	0.683438	1.03528	-0.0214829	0.686064	0.686064	-1.78	0.226802	0.226802	line1	-15	15	-1.73816
2021/05/28 17:03:11	ETH-2	462	STD	2	19819.7	19630.2	-147.86	-145.99	87	-10.556	0.00213603	-10.5233	-19.0672	0.00286138	-7.45175	0.00207147	-5.8919	0.00290016	-12.6184	0.048117	-0.879698	-31.7449	3.51467	-12.5971	-0.0673051	-14.032	0.0187502	-0.604731	-0.525447	0.102392	STD	0.2085	non ETH-3	0.805897	-1	3	0.201166	0.201166	1.03528	-0.0214829	0.186779	0.186779	-18.69	0.377234	line2	0.377234	-15	15
2021/05/28 17:35:43	ETH-1	462	STD	3	16927.7	16867.6	-130.659	-130.392	79	1.62594	0.00190899	6.11122	-2.57634	0.00295383	4.54075	0.0018582	10.8304	0.00299331	20.7484	0.0854115	-1.0076	4.7163	3.21906	-21.0666	0.0107467	14.7499	0.0166258	-0.622375	-0.496266	0.0949323	STD	0.2052	non ETH-3	0.805897	-2	3	0.183522	0.183522	1.03528	-0.0214829	0.168513	0.168513	-2.19	0.386341	0.386341	line1	-15	15	-2.3452
2021/05/28 18:07:57	ETH-3	462	STD	4	11099	10934.3	-93.162	-92.4005	95	1.30428	0.00189763	6.58541	-2.10625	0.00250995	4.25584	0.00181409	11.3056	0.00254281	22.0104	0.07644	-0.712431	24.9838	4.18952	-1.93957	0.054781	15.287	0.0236066	-0.262935	-0.09	0.14071	STD	0.6132	0.876135	0.825606	-3	3	0.562672	0.562672	1.03528	-0.0214829	0.561038	0.561038	-1.78	0.326249	line2	0.326249	-15	15
2021/05/28 19:53:23	ETH-3	462	STD	7	13666.5	13544.9	-110.852	-109.939	75	1.30403	0.00174084	6.65594	-2.03633	0.00288081	4.25806	0.00167868	11.3764	0.00291837	22.1344	0.0489662	-0.73109	31.6114	3.76146	4.37347	0.0668628	15.3704	0.0200144	-0.251825	-0.09	0.119256	STD	0.6132	0.865025	0.867163	-3	3	0.615337	0.615337	1.03528	-0.0214829	0.615561	0.615561	-1.78	0.256325	0.256325	line1	-15	15	-1.70088
2021/05/28 21:34:23	ETH-3	462	STD	10	16879.5	16812.8	-130.549	-130.296	84	1.28788	0.00171363	6.67703	-2.01541	0.00245012	4.24366	0.00164567	11.3976	0.00248229	21.9686	0.0601862	-0.934962	23.1379	3.21355	-3.90203	0.0492015	15.3811	0.0199612	-0.247128	-0.09	0.113508	STD	0.6132	0.860328	0.867076	-3	3	0.619948	0.619948	1.03528	-0.0214829	0.620334	0.620334	-1.78	0.235413	line2	0.235413	-15	15
2021/05/28 22:47:52	ETH-1	462	STD	12	20972.5	21200.1	-152.996	-153.785	91	1.64109	0.00197921	6.10875	-2.57879	0.00321888	4.55486	0.00193033	10.8279	0.00326176	20.7081	0.0533169	-1.04225	3.18232	2.46099	-22.5711	0.00820939	14.7939	0.0171794	-0.591187	-0.423694	0.098016	STD	0.2052	non ETH-3	0.868101	-3	3	0.276915	0.276915	1.03528	-0.0214829	0.2652	0.2652	-2.19	0.388793	line2	0.388793	-15	15
2021/05/28 23:21:30	ETH-3	462	STD	13	14294	13960.6	-114.622	-112.427	76	1.34864	0.00232022	6.66212	-2.03019	0.00360326	4.30007	0.00226022	11.3827	0.00365146	22.0187	0.0612907	-0.856639	24.7179	4.35986	-2.39533	0.0515965	15.4095	0.0208946	-0.262675	-0.09	0.111072	STD	0.6132	0.875875	0.8495	-3	3	0.586825	0.586825	1.03528	-0.0214829	0.586043	0.586043	-1.78	0.250193	0.250193	line1	-15	15	-1.64044
2021/05/29 01:09:18	ETH-3	462	STD	16	14206.6	13877.3	-113.929	-112.297	77	1.34962	0.00282106	6.67144	-2.02095	0.00313698	4.30131	0.00272676	11.3921	0.00318057	22.0101	0.0711121	-0.883529	30.0583	5.15334	2.7839	0.0624043	15.4846	0.0231271	-0.199097	-0.09	0.129645	STD	0.6132	0.812297	0.835849	-3	3	0.636752	0.636752	1.03528	-0.0214829	0.637731	0.637731	-1.78	0.240955	line2	0.240955	-15	15
2021/05/29 02:18:17	IAEA-C2	462	RP	18	22930.1	22880.3	-163.941	-162.746	96	-8.56344	0.0023467	-0.68201	-9.31091	0.00295963	-5.24263	0.00226998	3.9903	0.00299988	7.06444	0.0615956	-0.924736	-11.7423	2.26056	-13.937	-0.0248689	-1.62604	0.0169918	-0.11932	-0.00550461	0.0949046	sample	sample	non ETH-3	0.815836	-3	1	0.696516	sample	1.03528	-0.0214829	0.68431	0.68431	sample	sample	line2	sample	-15	15
2021/05/29 02:51:38	ETH-3	462	STD	19	15907.1	15722.9	-124.522	-123.512	79	1.17876	0.00286234	6.21302	-2.47542	0.00659458	4.12529	0.00286485	10.9316	0.0066815	21.3521	0.0637263	-0.616939	30.8901	2.7843	4.68039	0.0652176	14.8393	0.0254016	-0.206175	-0.09	0.134378	STD	0.6132	0.819375	0.815836	-3	0	0.609661	0.609661	1.03528	-0.0214829	0.609685	0.609685	-1.78	0.695417	0.695417	line1	-15	15	-2.01885
2021/05/31 12:55:49	ETH-2	463	STD	2	21739.1	21568.3	-162.334	-160.769	97	-10.5791	0.00247382	-10.6416	-19.1845	0.00356305	-7.4775	0.00240763	-6.01069	0.00361116	-12.6958	0.0496676	-0.719224	0.50097	2.95721	20.5543	0.00207812	-14.0949	0.0232375	-0.524402	-0.511785	0.126018	STD	0.2085	non ETH-3	0.815362	-1	3	0.29096	0.29096	1.03528	-0.0214829	0.279741	0.279741	-18.69	0.494514	line2	0.494514	-15	15
2021/05/31 13:29:03	ETH-1	463	STD	3	16888.3	16773.1	-134.016	-133.498	85	1.60482	0.0020132	6.01199	-2.67471	0.00281393	4.51752	0.00193234	10.7307	0.00285091	20.7536	0.0716327	-0.805596	21.8755	2.45294	-4.1302	0.0627325	14.6538	0.0183836	-0.596327	-0.533938	0.104413	STD	0.2052	non ETH-3	0.815362	-2	3	0.219035	0.219035	1.03528	-0.0214829	0.205279	0.205279	-2.19	0.484712	0.484712	line1	-15	15	-2.21814
2021/05/31 14:03:38	ETH-3	463	STD	4	18920	18862.8	-145.431	-145.472	95	1.30479	0.00211439	6.5767	-2.11488	0.00256766	4.25601	0.00203346	11.2969	0.00260221	21.5969	0.0569655	-1.09948	19.9663	3.4957	-6.80867	0.0551573	15.3402	0.0216529	-0.202162	-0.09	0.122538	STD	0.6132	0.815362	0.792155	-3	3	0.589993	0.589993	1.03528	-0.0214829	0.589323	0.589323	-1.78	0.33488	line2	0.33488	-15	15
2021/05/31 15:51:02	ETH-3	463	STD	7	18993.3	18930	-145.77	-145.284	87	1.26203	0.00220528	6.48226	-2.2085	0.00323003	4.21267	0.00215499	11.202	0.00327391	21.5566	0.0551779	-0.951426	17.8112	2.81857	-8.67887	0.0464982	15.2485	0.0184385	-0.155749	-0.09	0.102464	STD	0.6132	0.768949	0.800998	-3	3	0.645249	0.645249	1.03528	-0.0214829	0.646528	0.646528	-1.78	0.428501	0.428501	line1	-15	15	-1.72351
2021/05/31 17:30:50	ETH-3	463	STD	10	16105.5	16231	-128.541	-129.252	81	1.2745	0.00195965	6.55614	-2.13526	0.0036154	4.22692	0.00192137	11.2762	0.00366319	21.9506	0.0717678	-0.712768	30.0679	2.81369	3.09904	0.0755298	15.2861	0.0234504	-0.205483	-0.09	0.134712	STD	0.6132	0.818683	0.769809	-3	3	0.564325	0.564325	1.03528	-0.0214829	0.56275	0.56275	-1.78	0.355259	line2	0.355259	-15	15
2021/05/31 18:41:07	ETH-1	463	STD	12	20756.1	20930	-155.306	-155.734	88	1.60096	0.0023659	6.04358	-2.6434	0.00291193	4.51499	0.00229097	10.7624	0.00295182	20.4518	0.0578044	-1.16366	14.0592	2.71577	-11.8059	0.0359374	14.7554	0.0183438	-0.524442	-0.473552	0.100079	STD	0.2052	non ETH-3	0.770239	-3	3	0.245796	0.245796	1.03528	-0.0214829	0.232984	0.232984	-2.19	0.453399	line2	0.453399	-15	15
2021/05/31 19:16:31	ETH-3	463	STD	13	20017.3	20094.5	-151.384	-151.234	94	1.22183	0.00196366	6.28478	-2.40428	0.00306335	4.16814	0.00191557	11.0037	0.00310441	21.1032	0.061232	-1.00306	11.1516	2.67785	-14.7389	0.02849	15.0542	0.0173899	-0.108594	-0.09	0.0921611	STD	0.6132	0.721794	0.790795	-3	3	0.682201	0.682201	1.03528	-0.0214829	0.684784	0.684784	-1.78	0.624278	0.624278	line1	-15	15	-1.91065
2021/05/31 21:04:18	ETH-3	463	STD	16	17900.9	17787.1	-138.903	-138.089	85	1.30318	0.00213651	6.587	-2.10467	0.00341433	4.25486	0.00209673	11.3072	0.00346043	22.1144	0.0585955	-0.613876	34.1869	3.25118	7.01939	0.0835396	15.3324	0.0199974	-0.218708	-0.09	0.111573	STD	0.6132	0.831908	0.795239	-3	3	0.57653	0.57653	1.03528	-0.0214829	0.575385	0.575385	-1.78	0.324665	line2	0.324665	-15	15
2021/05/31 22:46:48	ETH-3	463	STD	19	16800.3	16791.9	-132.11	-132.602	82	1.30597	0.00222908	6.61083	-2.08105	0.0025717	4.25831	0.00212491	11.3312	0.00260558	21.9657	0.0606694	-0.806559	25.3604	2.81328	-1.62491	0.0604218	15.3596	0.0209842	-0.218813	-0.09	0.117978	STD	0.6132	0.832013	0.821498	-3	3	0.602685	0.602685	1.03528	-0.0214829	0.602462	0.602462	-1.78	0.301045	0.301045	line1	-15	15	-1.64006
2021/05/31 23:59:56	ETH-2	463	STD	21	22397	22284.1	-163.906	-162.171	95	-10.6108	0.00271593	-10.7589	-19.3008	0.00423278	-7.51124	0.00267701	-6.12846	0.00429064	-13.0752	0.0523646	-0.866435	-19.7788	3.33212	0.136793	-0.0465426	-14.2927	0.0229749	-0.573425	-0.465573	0.11987	STD	0.2085	non ETH-3	0.816292	-3	3	0.242867	0.242867	1.03528	-0.0214829	0.229951	0.229951	-18.69	0.610775	0.610775	line1	-15	15	-18.8598
2021/06/01 00:33:06	ETH-3	463	STD	22	19902.8	20069.7	-150.084	-150.978	92	1.29657	0.00141368	6.56313	-2.12833	0.00245561	4.24785	0.0013755	11.2833	0.00248794	21.7836	0.0512751	-0.889961	16.2926	2.1478	-10.3508	0.0397123	15.3333	0.0167783	-0.187372	-0.09	0.101072	STD	0.6132	0.800572	0.8296	-3	3	0.642228	0.642228	1.03528	-0.0214829	0.643401	0.643401	-1.78	0.348333	line2	0.348333	-15	15
2021/06/01 02:13:50	ETH-3	463	STD	25	17642.2	17813.4	-137.152	-138.038	84	1.30116	0.00163218	6.60111	-2.09069	0.00223442	4.25347	0.00156538	11.3214	0.0022638	21.8987	0.06253	-0.852768	24.9454	3.36078	-2.00479	0.0586825	15.3203	0.0207654	-0.243015	-0.09	0.120003	STD	0.6132	0.856215	0.810032	-3	3	0.567017	0.567017	1.03528	-0.0214829	0.565536	0.565536	-1.78	0.310685	0.310685	line1	-15	15	-1.6623
2021/06/01 03:24:09	IAEA-C2	463	TA	27	18468.2	18238.8	-142.259	-140.584	80	-8.52658	0.00191811	-0.667687	-9.29671	0.00347719	-5.2076	0.00188028	4.00475	0.00352324	7.30702	0.0678468	-0.712855	10.0087	3.002	7.69904	0.0237707	-1.6283	0.0205387	-0.17206	-0.0743158	0.120343	sample	sample	non ETH-3	0.814762	-3	3	0.642702	sample	1.03528	-0.0214829	0.628918	0.628918	sample	sample	sample	line1	-15	15	-8.86832
2021/06/01 03:57:53	ETH-3	463	STD	28	18395.8	18312.1	-141.237	-141.506	86	1.18919	0.00310967	6.19238	-2.49588	0.00674573	4.13434	0.00311821	10.9109	0.00683546	21.1376	0.0643236	-0.785965	24.5568	2.79658	-1.46158	0.057437	14.8751	0.022127	-0.160109	-0.09	0.117435	STD	0.6132	0.773309	0.800132	-3	3	0.640023	0.640023	1.03528	-0.0214829	0.641118	0.641118	-1.78	0.71588	line2	0.71588	-15	15
2021/06/01 05:44:52	ETH-3	463	STD	31	22459.7	22669.7	-164.06	-164.019	92	1.3055	0.00213275	6.54065	-2.15062	0.00291015	4.25543	0.00206617	11.2607	0.00294937	21.6152	0.0492749	-1.01015	8.80845	2.44448	-17.6039	0.0226407	15.3491	0.0181361	-0.157673	-0.09	0.0967142	STD	0.6132	0.770873	0.779341	-3	3	0.621668	0.621668	1.03528	-0.0214829	0.622115	0.622115	-1.78	0.370617	0.370617	line1	-15	15	-1.74362
2021/06/01 06:17:51	Merck	463	TA	32	19765.9	18850.1	-149.293	-144.012	95	-42.1827	0.00223811	-7.3807	-15.9518	0.00486882	-36.9761	0.00225052	-2.8043	0.00493375	-6.24219	0.07637	-0.645426	-23.3796	3.58156	22.3049	-0.0535099	-41.0818	0.0172147	-0.296261	-0.220932	0.0947908	sample	sample	non ETH-3	0.782357	-3	3	0.486096	sample	1.03528	-0.0214829	0.498472	0.498472	sample	sample	line2	sample	-15	15
2021/06/01 07:25:59	ETH-3	463	STD	34	19057.2	19161.6	-145.108	-145.626	88	1.21437	0.00165794	6.34293	-2.34663	0.00304471	4.16317	0.00161224	11.0621	0.00308452	21.4866	0.0571289	-0.74332	17.685	2.85092	-8.47995	0.0422849	15.0335	0.0165812	-0.18064	-0.09	0.0933957	STD	0.6132	0.79384	0.816417	-3	3	0.635777	0.635777	1.03528	-0.0214829	0.636721	0.636721	-1.78	0.566632	line2	0.566632	-15	15
2021/06/01 09:13:24	ETH-3	463	STD	37	17466.2	17327.2	-135.964	-134.811	84	1.29594	0.00230943	6.55849	-2.13293	0.00283471	4.24709	0.00223903	11.2786	0.0028737	21.7535	0.0568011	-0.910227	21.4633	3.63654	-5.30643	0.050329	15.2426	0.0206486	-0.271337	-0.09	0.114579	STD	0.6132	0.884537	0.804209	-3	3	0.532872	0.532872	1.03528	-0.0214829	0.530187	0.530187	-1.78	0.352927	0.352927	line1	-15	15	-1.73297
2021/06/01 10:56:26	ETH-3	463	STD	40	18058.6	18002.6	-139.548	-138.82	85	1.29647	0.00246859	6.45424	-2.23628	0.00372855	4.24396	0.00239487	11.174	0.00377822	21.7004	0.0685137	-0.755395	21.0369	3.17851	-5.5162	0.0496803	15.2887	0.0235893	-0.121049	-0.09	0.135142	STD	0.6132	0.734249	0.776065	-3	3	0.655016	0.655016	1.03528	-0.0214829	0.656639	0.656639	-1.78	0.456278	line2	0.456278	-15	15
2021/06/01 12:42:23	ETH-3	463	STD	43	21658.4	21671.4	-159.738	-158.642	92	1.27197	0.001882	6.41425	-2.27592	0.00282359	4.21962	0.00183067	11.1338	0.00286144	21.3285	0.0630427	-1.03968	-1.30914	2.6625	-27.1796	-0.00201701	15.2489	0.0199955	-0.0962095	-0.09	0.113097	STD	0.6132	0.709409	0.721829	-3	1	0.62562	0.62562	1.03528	-0.0214829	0.626207	0.626207	-1.78	0.495923	0.495923	line1	-15	15	-1.85811
2021/06/01 13:18:14	ETH-1	463	STD	44	23104.6	23260.9	-167.215	-166.4	97	1.63445	0.00225601	6.08561	-2.60173	0.00298433	4.54783	0.00219127	10.8047	0.00302502	20.4886	0.0453272	-1.21113	-1.29315	2.12622	-26.8805	-0.00202977	14.8217	0.020895	-0.533922	#DIV/0!	0.111878	STD	0.2052	non ETH-3	0.709409	-3	0	0.175488	0.175488	1.03528	-0.0214829	0.160195	0.160195	-2.19	0.411727	line2	0.411727	-15	15
2021/06/02 11:21:51	ETH-2	464	STD	2	19144.7	18911.8	-150.149	-148.346	87	-10.6579	0.00211655	-10.8894	-19.4301	0.0041719	-7.55987	0.00209132	-6.25954	0.00422716	-13.1115	0.0477417	-0.639684	-17.5918	2.91716	2.68099	-0.0296621	-14.3902	0.0190068	-0.492153	-0.469228	0.103512	STD	0.2085	non ETH-3	0.77902	-1	3	0.286867	0.286867	1.03528	-0.0214829	0.275504	0.275504	-18.69	0.74014	line2	0.74014	-15	15
2021/06/02 11:54:40	ETH-1	464	STD	3	19005.7	19178.1	-149.112	-149.811	79	1.56372	0.00163431	6.00567	-2.68098	0.00208106	4.47878	0.00155837	10.7243	0.00210822	20.7323	0.0624288	-0.813672	5.33964	2.50792	-20.1923	0.010275	14.6866	0.0162534	-0.517988	-0.468616	0.0949994	STD	0.2052	non ETH-3	0.77902	-2	3	0.261032	0.261032	1.03528	-0.0214829	0.248758	0.248758	-2.19	0.49098	0.49098	line1	-15	15	-2.25137
2021/06/02 12:27:58	ETH-3	464	STD	4	18103.5	18036.9	-143.09	-142.566	95	1.27252	0.00164853	6.52458	-2.16655	0.00323104	4.22397	0.00160167	11.2445	0.00327299	21.9769	0.058304	-0.624452	11.9223	2.8511	-14.5075	0.0225911	15.292	0.017978	-0.16582	-0.09	0.101021	STD	0.6132	0.77902	0.785581	-3	3	0.619761	0.619761	1.03528	-0.0214829	0.62014	0.62014	-1.78	0.386548	line2	0.386548	-15	15
2021/06/02 14:12:31	ETH-3	464	STD	7	17735.4	17511.9	-139.757	-138.74	75	1.28423	0.00247676	6.53257	-2.15863	0.00341736	4.23522	0.00241472	11.2526	0.00346402	21.814	0.0715176	-0.79957	15.9458	4.22303	-10.6171	0.0316088	15.2984	0.0190236	-0.178941	-0.09	0.0991831	STD	0.6132	0.792141	0.800624	-3	3	0.621683	0.621683	1.03528	-0.0214829	0.62213	0.62213	-1.78	0.378627	0.378627	line1	-15	15	-1.72539
2021/06/02 15:57:00	ETH-3	464	STD	10	18857.5	19135.2	-145.705	-146.67	84	1.32616	0.00157744	6.57763	-2.11396	0.00199138	4.27607	0.00150378	11.2979	0.00201738	21.8797	0.0583953	-0.82489	8.66666	2.6558	-17.8341	0.0185129	15.3465	0.0161799	-0.21751	-0.09	0.0994754	STD	0.6132	0.83071	0.811426	-3	3	0.593916	0.593916	1.03528	-0.0214829	0.593384	0.593384	-1.78	0.333959	line2	0.333959	-15	15
2021/06/02 17:08:49	ETH-1	464	STD	12	17354.3	17301.2	-136.729	-136.196	91	1.60851	0.00193936	6.06669	-2.62049	0.00236664	4.52287	0.00186817	10.7856	0.00239861	20.7332	0.073069	-0.934062	21.5278	3.3332	-4.58095	0.0440272	14.7169	0.0201914	-0.593028	-0.467713	0.110802	STD	0.2052	non ETH-3	0.83071	-3	3	0.237682	0.237682	1.03528	-0.0214829	0.224583	0.224583	-2.19	0.430489	line2	0.430489	-15	15
2021/06/02 19:30:22	ETH-3	464	STD	16	15308	14976.1	-123.724	-121.564	77	1.24414	0.00381302	6.32341	-2.36599	0.00567012	4.19039	0.00372284	11.0425	0.00574681	21.395	0.0587152	-0.794346	27.9201	5.09275	1.49945	0.0569329	15.0237	0.0236963	-0.199203	-0.09	0.118434	STD	0.6132	0.812403	0.839701	-3	3	0.640498	0.640498	1.03528	-0.0214829	0.641609	0.641609	-1.78	0.585986	line2	0.585986	-15	15
2021/06/02 20:41:54	IAEA-C2	464	RP	18	16124.2	15840.5	-128.881	-126.849	96	-8.62749	0.0026413	-0.962359	-9.58884	0.00480422	-5.31239	0.00259141	3.70877	0.00486789	6.5944	0.0551676	-0.830766	1.00654	3.91701	-0.592126	0.0022118	-2.06858	0.0224603	-0.214594	-0.0689939	0.121801	sample	sample	non ETH-3	0.839701	-3	3	0.625107	sample	1.03528	-0.0214829	0.584245	0.584245	sample	sample	line2	sample	-15	15
2021/06/02 21:15:55	ETH-3	464	STD	19	14188.7	14189.9	-116.751	-116.697	79	1.27516	0.00147505	6.46287	-2.22773	0.00224798	4.2243	0.00140778	11.1826	0.00227695	21.7145	0.0689265	-0.758646	25.9084	3.75053	-0.766507	0.0532121	15.1419	0.0197587	-0.253799	-0.09	0.118452	STD	0.6132	0.866999	0.839701	-3	3	0.585902	0.585902	1.03528	-0.0214829	0.585088	0.585088	-1.78	0.447727	0.447727	line1	-15	15	-1.76271
2021/06/03 00:07:14	ETH-3	464	STD	25	18679.8	18519.7	-143.923	-142.678	88	1.25734	0.00190186	6.44182	-2.2486	0.00350144	4.20687	0.0018578	11.1614	0.0035475	21.5662	0.0629171	-0.8618	13.7442	2.53765	-12.556	0.0296952	15.1104	0.0198568	-0.246358	-0.179172	0.112225	STD	0.6132	0.859558	0.842955	-3	3	0.596598	0.596598	1.03528	-0.0214829	0.596161	0.596161	-1.78	0.468595	0.468595	line1	-15	15	-1.76893
2021/06/03 02:51:33	ETH-3	464	STD	31	17184.6	16909.6	-134.738	-132.922	81	1.28223	0.00249602	6.49379	-2.19708	0.00312502	4.232	0.00240767	11.2136	0.00316724	21.7329	0.0652609	-0.802008	12.7464	3.71884	-13.6545	0.0279615	15.2218	0.016322	-0.213153	-0.129015	0.0847722	STD	0.6132	0.826353	0.835355	-3	3	0.622202	0.622202	1.03528	-0.0214829	0.622668	0.622668	-1.78	0.417078	0.417078	line1	-15	15	-1.75235
2021/06/03 05:31:47	ETH-3	464	STD	37	16502.1	16464.7	-130.187	-130.326	80	1.21195	0.00213931	6.29048	-2.39863	0.00348686	4.15908	0.00209339	11.0094	0.00353356	21.1665	0.0741965	-0.952361	24.5647	4.40533	-1.67128	0.0542661	14.9505	0.0207357	-0.206955	-0.106439	0.119227	STD	0.6132	0.820155	0.820575	-3	3	0.61362	0.61362	1.03528	-0.0214829	0.613784	0.613784	-1.78	0.618629	0.618629	line1	-15	15	-1.9539
2021/06/03 06:24:36	Merck	464	RP	39	16676.5	16060.3	-131.317	-127.425	84	-42.5301	0.00272386	-7.81872	-16.386	0.00380937	-37.3167	0.00265106	-3.24469	0.00386106	-7.26219	0.0723709	-0.788798	-40.2468	3.73036	5.90086	-0.0900949	-41.9096	0.0216996	-0.360455	-0.248348	0.118815	sample	sample	non ETH-3	0.817686	-3	2	0.457232	sample	1.03528	-0.0214829	0.43105	0.43105	sample	sample	sample	line1	-15	15	-15.9543
2021/06/03 08:14:20	ETH-3	464	STD	43	17006.9	16839.3	-133.308	-132.231	86	1.25926	0.0018588	6.45103	-2.23946	0.00334449	4.20899	0.00180181	11.1707	0.00338812	21.6665	0.0683416	-0.782008	13.7538	2.47067	-12.5666	0.0316373	15.1667	0.0204232	-0.202018	#DIV/0!	0.119872	STD	0.6132	0.815218	0.817686	-3	0	0.615669	0.615669	1.03528	-0.0214829	0.615904	0.615904	-1.78	0.459463	0.459463	line1	-15	15	-1.80775
2021/06/03 13:54:06	ETH-2	465	STD	2	23341.6	23272.5	-169.732	-168.864	87	-10.5747	0.00228702	-10.5958	-19.1391	0.00433607	-7.47172	0.00225927	-5.96472	0.00439377	-12.6032	0.0464895	-0.717985	-9.74415	2.60278	10.0058	-0.0258865	-14.0959	0.0235091	-0.576852	-0.521364	0.13312	STD	0.2085	non ETH-3	0.825083	-1	3	0.248231	0.248231	1.03528	-0.0214829	0.235505	0.235505	-18.69	0.449121	line2	0.449121	-15	15
2021/06/03 14:28:57	ETH-1	465	STD	3	22871.2	23105.5	-166.712	-166.982	94	1.59105	0.00235597	6.03036	-2.65651	0.00243005	4.50524	0.00227545	10.7491	0.00246429	20.5123	0.0533203	-1.07816	12.6529	2.52459	-13.1406	0.0359698	14.6752	0.0191091	-0.580567	-0.491882	0.108335	STD	0.2052	non ETH-3	0.825083	-2	3	0.244516	0.244516	1.03528	-0.0214829	0.231659	0.231659	-2.19	0.466506	0.466506	line1	-15	15	-2.22708
2021/06/03 15:03:21	ETH-3	465	STD	4	17673.8	17686	-137.93	-137.156	83	1.3271	0.0019951	6.64012	-2.05201	0.00304372	4.27913	0.00193721	11.3606	0.00308428	22.0243	0.0631779	-0.807452	20.652	2.68149	-6.28834	0.0553039	15.4174	0.0167	-0.211883	-0.09	0.0947947	STD	0.6132	0.825083	0.81025	-3	3	0.598367	0.598367	1.03528	-0.0214829	0.597992	0.597992	-1.78	0.272008	line2	0.272008	-15	15
2021/06/03 16:50:00	ETH-3	465	STD	7	19166.5	19005.1	-146.061	-145.008	88	1.36494	0.00276868	6.67736	-2.01509	0.00275224	4.31588	0.0026712	11.3981	0.00279118	21.9966	0.0545215	-0.908558	21.3587	2.89806	-5.71153	0.0559691	15.5228	0.0171613	-0.182217	-0.09	0.0946577	STD	0.6132	0.795417	0.812006	-3	3	0.62979	0.62979	1.03528	-0.0214829	0.630523	0.630523	-1.78	0.235085	0.235085	line1	-15	15	-1.58813
2021/06/03 18:33:20	ETH-3	465	STD	10	17526.1	17509.5	-136.847	-136.666	93	1.262	0.00185094	6.4877	-2.20311	0.00270291	4.21283	0.00178806	11.2075	0.00273877	21.7733	0.0532887	-0.750341	30.8713	3.03267	4.03061	0.0783908	15.2068	0.0173145	-0.202319	-0.09	0.0978334	STD	0.6132	0.815519	0.82339	-3	3	0.621072	0.621072	1.03528	-0.0214829	0.621498	0.621498	-1.78	0.423107	line2	0.423107	-15	15
2021/06/03 20:21:27	ETH-3	465	STD	13	22092.5	22304.6	-162.132	-162.846	97	1.30827	0.00219274	6.57089	-2.12064	0.00283856	4.25908	0.00212124	11.2911	0.002877	21.7913	0.0559969	-0.897929	14.2831	2.09979	-12.3346	0.0378807	15.2931	0.0166634	-0.246036	-0.09	0.0927572	STD	0.6132	0.859236	0.835251	-3	3	0.589214	0.589214	1.03528	-0.0214829	0.588517	0.588517	-1.78	0.340637	0.340637	line1	-15	15	-1.74004
2021/06/03 22:08:02	ETH-3	465	STD	16	20204.7	20262.8	-151.733	-151.938	90	1.42858	0.00222276	6.85989	-1.83413	0.00391746	4.38185	0.0022006	11.5814	0.0039703	22.4545	0.0588072	-0.823222	21.8236	3.12849	-5.68307	0.0557237	15.7365	0.0215934	-0.217797	-0.09	0.120641	STD	0.6132	0.830997	0.836502	-3	3	0.618705	0.618705	1.03528	-0.0214829	0.619048	0.619048	-1.78	0.0541303	line2	0.0541303	-15	15
2021/06/03 23:53:06	ETH-3	465	STD	19	17728.8	17594.1	-137.547	-136.623	90	1.31851	0.00205132	6.62054	-2.07141	0.00319454	4.2704	0.00199821	11.3409	0.00323726	21.9085	0.0511007	-0.88184	28.1884	2.92529	1.09656	0.0700528	15.3947	0.0158559	-0.206074	-0.09	0.0839544	STD	0.6132	0.819274	0.824807	-3	3	0.618733	0.618733	1.03528	-0.0214829	0.619076	0.619076	-1.78	0.291413	0.291413	line1	-15	15	-1.73342
2021/06/04 01:04:20	ETH-2	465	STD	21	24414.3	24610.9	-173.687	-174.156	99	-10.6138	0.00232413	-10.7347	-19.2768	0.00446527	-7.51325	0.00230646	-6.10422	0.00452494	-12.836	0.0495265	-0.673092	-8.56798	2.28339	11.5296	-0.020817	-14.304	0.0190897	-0.606768	-0.487444	0.10281	STD	0.2085	non ETH-3	0.821711	-3	3	0.214943	0.214943	1.03528	-0.0214829	0.201043	0.201043	-18.69	0.586826	0.586826	line1	-15	15	-18.9069
2021/06/04 01:39:46	ETH-3	465	STD	22	19825.7	19992.4	-149.488	-150.019	91	1.28563	0.00219038	6.62124	-2.07073	0.00253965	4.23962	0.00210529	11.3416	0.00257401	21.9882	0.0557568	-0.805148	23.0418	1.87915	-3.88267	0.0579806	15.3583	0.0192469	-0.210949	-0.09	0.115065	STD	0.6132	0.824149	0.811534	-3	3	0.600585	0.600585	1.03528	-0.0214829	0.600288	0.600288	-1.78	0.290728	line2	0.290728	-15	15
2021/06/04 03:23:29	ETH-3	465	STD	25	22719.1	23370.5	-165.25	-167.276	95	1.30706	0.00205151	6.62778	-2.06424	0.00241977	4.25992	0.00197369	11.3482	0.00245251	21.7703	0.0448969	-1.03128	8.97968	1.79157	-17.6084	0.0236007	15.4195	0.016233	-0.177978	-0.09	0.0952766	STD	0.6132	0.791178	0.795087	-3	3	0.617109	0.617109	1.03528	-0.0214829	0.617396	0.617396	-1.78	0.284239	0.284239	line1	-15	12	-1.70566
2021/06/04 05:10:30	ETH-3	465	STD	28	17902.8	18022.3	-138.557	-139.181	84	1.30526	0.00203965	6.56313	-2.12833	0.0019717	4.25599	0.00193723	11.2833	0.00199786	21.8425	0.0567391	-0.832429	25.0989	2.85547	-1.78407	0.0616113	15.3729	0.0197908	-0.156735	-0.09	0.121584	STD	0.6132	0.769935	0.784379	-3	3	0.627645	0.627645	1.03528	-0.0214829	0.628303	0.628303	-1.78	0.348332	line2	0.348332	-15	9
2021/06/04 06:40:48	ETH-3	465	STD	31	18676.6	18706.1	-142.693	-142.859	87	1.31211	0.00249774	6.62221	-2.06976	0.00311252	4.26445	0.00242487	11.3426	0.00315537	21.9703	0.0598569	-0.824689	26.9659	3.25114	-0.0907245	0.0667812	15.4179	0.025791	-0.178825	-0.216566	0.135866	STD	0.6132	0.792025	0.78098	-3	3	0.602155	0.602155	1.03528	-0.0214829	0.601914	0.601914	-1.78	0.289761	0.289761	line1	-15	7	-1.68227
2021/06/04 13:32:01	ETH-3	465	STD	39	20547.3	20757.2	-153.749	-154.975	85	1.22297	0.00196061	6.3482	-2.3414	0.00244334	4.17141	0.00189213	11.0674	0.00247642	21.4317	0.0552789	-0.807545	20.0186	2.18353	-6.2251	0.0581877	15.0665	0.018861	-0.161783	-0.00498914	0.106998	STD	0.6132	0.774983	0.774983	-3	2	0.6132	0.6132	1.03528	-0.0214829	0.613348	0.613348	-1.78	0.561404	0.561404	line1	-15	2	-1.75458
2021/06/04 14:07:01	ETH-1	465	STD	40	18912.1	18917.5	-144.454	-144.187	96	1.62214	0.00216536	6.104	-2.5835	0.0031082	4.53694	0.00210049	10.8231	0.00314989	20.7887	0.0623286	-0.953819	18.6477	2.61381	-7.47463	0.053173	14.7881	0.0190545	-0.573747	-0.287653	0.103557	STD	0.2052	non ETH-3	0.774983	-3	1	0.201236	0.201236	1.03528	-0.0214829	0.186851	0.186851	-2.19	0.393502	line2	0.393502	-15	1
2021/06/04 14:46:50	ETH-2	465	STD	41	23558.8	23642.5	-170.033	-169.271	97	-10.736	0.00354868	-11.0713	-19.6105	0.00782086	-7.63942	0.00357546	-6.44234	0.00792518	-13.6302	0.0630861	-0.797362	-12.942	2.70114	7.87608	-0.0353828	-14.663	0.024776	-0.505394	-0.09	0.115815	STD	0.2085	non ETH-3	0.774983	-3	0	0.269589	0.269589	1.03528	-0.0214829	0.257616	0.257616	-18.69	0.92052	0.92052	line1	-15	2	-19.3263
2021/06/04 20:27:50	ETH-3	466	STD	4	17945.5	17924.7	-139.85	-139.418	94	1.37175	0.00224991	6.71495	-1.97782	0.00299629	4.32356	0.00217782	11.4358	0.00303674	21.9608	0.0544704	-1.01809	12.3012	3.96336	-14.6094	0.0279868	15.521	0.0191068	-0.228601	-0.09	0.113091	STD	0.6132	0.841801	0.841801	-3	3	0.6132	0.6132	1.03528	-0.0214829	0.613348	0.613348	-1.78	0.197824	line2	0.197824	-15	15
2021/06/04 23:52:38	ETH-3	466	STD	10	17279.7	17328.3	-135.746	-135.957	90	0.948446	0.00230281	5.69843	-2.98556	0.00269445	3.8916	0.00222783	10.4146	0.00273161	19.8093	0.0614927	-1.10521	26.505	3.7099	1.66145	0.0572937	14.103	0.0156596	-0.188903	-0.09	0.094756	STD	0.6132	0.802103	0.802103	-3	3	0.6132	0.6132	1.03528	-0.0214829	0.613348	0.613348	-1.78	1.20556	line2	1.20556	-15	15
2021/06/05 03:23:08	ETH-3	466	STD	16	17247.1	17327.7	-135.411	-135.401	87	0.853656	0.00283221	5.49864	-3.18363	0.00333856	3.79584	0.00274165	10.2139	0.00338463	19.4194	0.0466334	-1.09026	15.7633	4.43283	-8.3329	0.0342646	13.8112	0.0222824	-0.18298	-0.09	0.121072	STD	0.6132	0.79618	0.79618	-3	3	0.6132	0.6132	1.03528	-0.0214829	0.613348	0.613348	-1.78	1.40363	line2	1.40363	-15	15
2021/06/05 06:14:04	ETH-2	466	STD	21	15912	15775.6	-126.656	-126.183	81	-10.3341	0.00238959	-9.99522	-18.5437	0.00315496	-7.22544	0.00231184	-5.36137	0.00319756	-11.2801	0.0679178	-0.592538	24.1806	4.31044	43.0864	0.0506109	-13.2113	0.0184215	-0.532521	-0.468199	0.113894	STD	0.2085	non ETH-3	0.761953	-3	3	0.229432	0.229432	1.03528	-0.0214829	0.216042	0.216042	-18.69	-0.146292	-0.146292	line1	-15	15	-18.4804
2021/06/05 06:49:13	ETH-3	466	STD	22	16667.2	16532.9	-131.547	-130.645	83	1.38942	0.00311646	6.8432	-1.85068	0.00526802	4.34458	0.00306675	11.5646	0.00533887	22.4888	0.0679451	-0.756457	41.1683	3.78749	13.2136	0.0867944	15.7511	0.0206708	-0.148753	-0.09	0.0997624	STD	0.6132	0.761953	0.761953	-3	3	0.6132	0.6132	1.03528	-0.0214829	0.613348	0.613348	-1.78	0.0706793	line2	0.0706793	-15	15
2021/06/05 11:55:48	ETH-3	466	STD	31	14788.7	14463.5	-119.892	-118.085	76	1.33618	0.00211426	6.63918	-2.05294	0.00328998	4.2876	0.00205036	11.3597	0.0033336	21.959	0.0740138	-0.869509	26.9095	5.49738	-0.203968	0.055497	15.4381	0.0158827	-0.199307	-0.09	0.0896939	STD	0.6132	0.812507	0.80198	-3	3	0.602673	0.602673	1.03528	-0.0214829	0.60245	0.60245	-1.78	0.27294	0.27294	line1	-15	15	-1.49167
2021/06/05 13:34:44	ETH-3	466	STD	34	18084.2	18218.5	-140.513	-140.829	88	1.34707	0.00190667	6.67372	-2.01869	0.00264435	4.29901	0.00184118	11.3944	0.00267963	21.8121	0.0711629	-1.08163	21.8346	3.71751	-5.22329	0.046803	15.5056	0.0199735	-0.178253	-0.09	0.11337	STD	0.6132	0.791453	0.80198	-3	3	0.623727	0.623727	1.03528	-0.0214829	0.624247	0.624247	-1.78	0.238693	line2	0.238693	-15	15
2021/06/05 16:29:57	IAEA-C2	466	NW	39	21334.3	21454.1	-158.453	-158.564	96	-8.7912	0.00221233	-0.83958	-9.46712	0.00296773	-5.46152	0.00213755	3.83166	0.00300757	6.70563	0.0551305	-0.965022	-13.1982	2.80504	-14.853	-0.0273857	-2.02401	0.0161279	-0.135596	-0.00756027	0.0941558	sample	sample	non ETH-3	0.867653	-3	3	0.732057	sample	1.03528	-0.0214829	0.736399	0.736399	sample	sample	sample	line1	-15	15	-8.80706
2021/06/05 17:03:47	ETH-3	466	STD	40	14904.4	14983.6	-120.434	-120.642	77	1.05322	0.00144822	5.97518	-2.71121	0.00185655	3.99939	0.00137332	10.6926	0.00188041	20.5669	0.0709923	-0.912984	19.8922	3.36689	-5.44236	0.0417106	14.4232	0.0173069	-0.254453	-0.09	0.105254	STD	0.6132	0.867653	0.828403	-3	3	0.57395	0.57395	1.03528	-0.0214829	0.572714	0.572714	-1.78	0.931208	line2	0.931208	-15	15
2021/06/05 18:47:10	ETH-3	466	STD	43	19374.1	19579.7	-147.376	-148.017	94	0.754326	0.00206084	5.26299	-3.41725	0.00219489	3.69458	0.00197436	9.97712	0.00222466	18.9306	0.054519	-1.10109	7.97829	3.32673	-15.3733	0.0183054	13.4792	0.0214226	-0.175954	-0.09	0.126518	STD	0.6132	0.789154	0.821886	-3	3	0.645933	0.645933	1.03528	-0.0214829	0.647236	0.647236	-1.78	1.63725	1.63725	line1	-15	15	-2.75719
2021/06/05 19:21:20	ETH-1	466	STD	44	19104.4	19314.3	-145.47	-146.252	91	1.65623	0.00171636	6.19469	-2.49359	0.00224109	4.57203	0.00164115	10.9142	0.00227049	20.8527	0.0440587	-1.07126	8.35465	2.66098	-17.7141	0.0189715	14.8683	0.0159403	-0.619392	-0.526872	0.0923112	STD	0.2052	non ETH-3	0.799003	-3	2	0.179611	0.179611	1.03528	-0.0214829	0.164464	0.164464	-2.19	0.303594	line2	0.303594	-15	15
2021/06/05 19:55:18	ETH-2	466	STD	45	14601.9	14498	-118.281	-117.417	77	-10.627	0.00181121	-10.6281	-19.1712	0.00241187	-7.52184	0.00173236	-5.99727	0.00244347	-12.7851	0.061166	-0.836611	-14.5831	3.45307	5.18961	-0.0315615	-14.2469	0.0192964	-0.645629	-0.546543	0.124409	STD	0.2085	non ETH-3	0.799003	-3	1	0.153374	0.153374	1.03528	-0.0214829	0.137301	0.137301	-18.69	0.481164	0.481164	line1	-15	15	-18.6012
2021/06/05 20:29:49	ETH-3	466	STD	46	17034.9	16905.8	-133.901	-132.278	85	1.00576	0.00204	5.88712	-2.7985	0.00257529	3.95186	0.00196823	10.6041	0.00261005	20.3248	0.056094	-0.97506	15.775	3.48083	-9.23731	0.0340024	14.346	0.0252593	-0.195652	-0.09	0.148709	STD	0.6132	0.808852	0.799003	-3	0	0.603351	0.603351	1.03528	-0.0214829	0.603152	0.603152	-1.78	1.0185	line2	1.0185	-15	15
2021/06/07 12:22:47	ETH-2	467	STD	2	15019.7	14888.5	-122.843	-122.192	81	-10.6226	0.00197646	-10.7544	-19.2964	0.00266861	-7.52219	0.00192265	-6.12404	0.002705	-12.5346	0.0745794	-0.328111	22.6087	4.76778	43.389	0.0499	-14.2781	0.0236949	-0.551627	-0.490119	0.142929	STD	0.2085	non ETH-3	0.771832	-1	3	0.220205	0.220205	1.03528	-0.0214829	0.20649	0.20649	-18.69	0.606378	line2	0.606378	-2	15
2021/06/07 12:55:33	ETH-1	467	STD	3	14353.3	14295.3	-118.273	-118.293	77	1.56682	0.00124194	5.98196	-2.70448	0.00248259	4.48086	0.00119493	10.7005	0.0025144	20.5958	0.0562763	-0.900272	26.0559	3.22513	0.0416119	0.0573285	14.5734	0.0166392	-0.608524	-0.543455	0.0997433	STD	0.2052	non ETH-3	0.771832	-2	3	0.163307	0.163307	1.03528	-0.0214829	0.147585	0.147585	-2.19	0.514482	0.514482	line1	-3	15	-2.31964
2021/06/07 13:28:42	ETH-3	467	STD	4	14536.2	14556.9	-119.285	-119.489	78	1.03183	0.00176281	5.88659	-2.79903	0.00185697	3.97628	0.00167136	10.6036	0.00188119	20.3654	0.0689117	-0.934361	21.2437	3.58901	-3.92773	0.0467257	14.4085	0.0162791	-0.158632	-0.09	0.101737	STD	0.6132	0.771832	0.773767	-3	3	0.615135	0.615135	1.03528	-0.0214829	0.615352	0.615352	-1.78	1.01903	line2	1.01903	-4	15
2021/06/07 15:10:58	ETH-3	467	STD	7	17547.7	17539	-138.196	-138.022	90	1.30601	0.00193772	6.51659	-2.17447	0.00250456	4.25507	0.00186154	11.2366	0.00253786	21.709	0.0541061	-0.870643	32.5258	4.15118	5.54003	0.0730953	15.32	0.0212436	-0.162502	-0.09	0.121758	STD	0.6132	0.775702	0.791913	-3	3	0.629411	0.629411	1.03528	-0.0214829	0.630131	0.630131	-1.78	0.394466	0.394466	line1	-7	15	-1.78963
2021/06/07 15:43:34	IAEA-C2	467	JF	8	13812.8	13523.9	-114.394	-112.184	80	-8.64836	0.0017595	-0.89215	-9.51924	0.00309961	-5.32951	0.00170284	3.7792	0.00314002	6.93731	0.0768893	-0.630649	0.668059	3.34967	-1.04876	0.000945878	-2.01328	0.0220474	-0.210408	-0.120406	0.132782	sample	sample	non ETH-3	0.801953	-3	3	0.591545	sample	1.03528	-0.0214829	0.588642	0.588642	sample	sample	line2	sample	-8	15
2021/06/07 16:50:59	ETH-3	467	STD	10	16420.3	16332.2	-130.622	-130.294	82	1.31437	0.00233141	6.56558	-2.12591	0.00296173	4.26461	0.00225271	11.2857	0.00300183	21.8939	0.0604826	-0.787071	32.9239	4.19427	5.82105	0.0732055	15.3252	0.0254326	-0.215005	-0.09	0.141808	STD	0.6132	0.828205	0.777784	-3	3	0.562779	0.562779	1.03528	-0.0214829	0.561149	0.561149	-1.78	0.345907	line2	0.345907	-10	15
2021/06/07 18:37:04	ETH-3	467	STD	13	18365.1	18334.8	-142.646	-141.645	89	1.40761	0.00170295	6.79399	-1.89947	0.00168277	4.35991	0.00160916	11.5152	0.00170452	22.3315	0.0606729	-0.812642	18.5375	2.47652	-8.72937	0.0426156	15.7514	0.0220695	-0.116245	-0.09	0.127988	STD	0.6132	0.729445	0.796533	-3	3	0.680288	0.680288	1.03528	-0.0214829	0.682803	0.682803	-1.78	0.11947	0.11947	line1	-13	15	-1.51463
2021/06/07 20:18:50	ETH-3	467	STD	16	14129.1	14111	-115.743	-115.959	75	1.16379	0.00208192	6.2853	-2.40376	0.00272879	4.11377	0.00199818	11.0041	0.00276492	21.2971	0.0761896	-0.814197	30.0588	4.37583	3.74107	0.0676834	14.8861	0.0215712	-0.21875	-0.09	0.126881	STD	0.6132	0.83195	0.776584	-3	3	0.557834	0.557834	1.03528	-0.0214829	0.556029	0.556029	-1.78	0.623763	line2	0.623763	-15	15
2021/06/07 21:59:25	ETH-3	467	STD	19	18618.8	18712.4	-143.988	-143.527	86	1.28834	0.00179787	6.54622	-2.1451	0.00271834	4.23955	0.00174091	11.2663	0.00275441	21.5904	0.0616991	-1.04531	15.4226	2.91516	-11.1568	0.0361131	15.3406	0.0155554	-0.155157	-0.09	0.0873825	STD	0.6132	0.768357	0.806902	-3	3	0.651745	0.651745	1.03528	-0.0214829	0.653253	0.653253	-1.78	0.365096	0.365096	line1	-15	15	-1.75637
2021/06/07 23:11:18	ETH-2	467	STD	21	21606.9	21651.6	-160.246	-159.707	97	-10.5981	0.00247699	-10.6611	-19.2038	0.00303875	-7.49592	0.00241232	-6.03026	0.0030811	-12.8759	0.0543792	-0.862183	-21.1603	3.02197	-1.48261	-0.0485258	-14.2079	0.019423	-0.600469	-0.500617	0.107495	STD	0.2085	non ETH-3	0.794378	-3	3	0.193909	0.193909	1.03528	-0.0214829	0.179267	0.179267	-18.69	0.513802	0.513802	line1	-15	15	-18.7837
2021/06/07 23:45:48	ETH-3	467	STD	22	20932.4	21282.1	-156.227	-157.483	96	1.0756	0.00157308	6.03401	-2.65288	0.0018756	4.02241	0.0015074	10.7517	0.00190062	20.6639	0.0612866	-0.934885	4.8738	1.86632	-20.2242	0.0122243	14.5534	0.0144123	-0.207199	-0.09	0.0886401	STD	0.6132	0.820399	0.791232	-3	3	0.584033	0.584033	1.03528	-0.0214829	0.583153	0.583153	-1.78	0.872884	line2	0.872884	-15	15
2021/06/08 01:27:26	ETH-3	467	STD	25	20563.7	20970	-154.588	-155.964	95	1.28678	0.00186182	6.50929	-2.18171	0.00199398	4.2368	0.00177085	11.2292	0.00202026	21.6294	0.0655624	-0.933936	9.88065	2.27116	-16.4798	0.0244619	15.2843	0.0188477	-0.17174	-0.09	0.111799	STD	0.6132	0.78494	0.800385	-3	3	0.628645	0.628645	1.03528	-0.0214829	0.629338	0.629338	-1.78	0.40171	0.40171	line1	-15	15	-1.6477
2021/06/08 03:11:58	ETH-3	467	STD	28	20980.8	21386.3	-156.256	-157.947	97	1.2304	0.00228729	6.48556	-2.20523	0.00245288	4.18315	0.00218132	11.2053	0.00248553	21.4405	0.0639025	-1.07136	3.63812	2.00385	-22.4583	0.00968821	15.1936	0.0170844	-0.182616	-0.09	0.0992942	STD	0.6132	0.795816	0.782678	-3	3	0.600063	0.600063	1.03528	-0.0214829	0.599748	0.599748	-1.78	0.425228	line2	0.425228	-15	13
2021/06/08 04:58:11	ETH-3	467	STD	31	19408.6	19470.9	-147.882	-147.538	92	1.19135	0.00227661	6.37202	-2.3178	0.00276221	4.14261	0.00220025	11.0912	0.00279993	21.3017	0.0511967	-0.98177	15.6671	3.02699	-10.4805	0.0380352	15.0678	0.022378	-0.154079	-0.09	0.125283	STD	0.6132	0.767279	0.781547	-3	3	0.627468	0.627468	1.03528	-0.0214829	0.62812	0.62812	-1.78	0.537796	0.537796	line1	-15	10	-1.83249
2021/06/08 05:31:05	2F	467	STD	32	14604.2	14492.6	-118.528	-118.033	93	1.78992	0.0017268	10.5746	1.84853	0.00240116	4.84955	0.0016473	15.3108	0.0024323	30.0724	0.0699586	-0.760025	30.6069	2.8321	-4.85516	0.0704579	19.947	0.0195595	-0.17923	-0.114378	0.117047	STD	FALSE	non ETH-3	0.767279	-3	3	0.588049	0.588049	1.03528	-0.0214829	0.58731	0.58731	FALSE	-1.84853	line2	-1.84853	-15	9
2021/06/08 10:14:03	ETH-3	467	STD	37	16522	16827.5	-129.724	-132.601	82	1.22857	0.00322587	6.30109	-2.38811	0.0039626	4.17502	0.00313714	11.0201	0.00401759	21.4952	0.0774549	-0.651951	39.9343	4.49595	13.2662	0.0951482	15.0475	0.0229745	-0.138227	-0.0620338	0.123972	STD	0.6132	0.751427	0.775203	-3	3	0.636976	0.636976	1.03528	-0.0214829	0.637963	0.637963	-1.78	0.608114	0.608114	line1	-15	5	-1.90368
2021/06/08 13:21:16	ETH-3	467	STD	43	14758.6	14570.3	-118.84	-117.929	75	1.26657	0.00232676	6.46272	-2.22787	0.00301266	4.21624	0.0022466	11.1824	0.00305325	21.8448	0.0586995	-0.630871	21.0999	3.03894	-5.44172	0.0530984	15.2024	0.0194565	-0.185778	-0.09	0.111925	STD	0.6132	0.798978	0.785151	-3	3	0.599372	0.599372	1.03528	-0.0214829	0.599033	0.599033	-1.78	0.447875	0.447875	line1	-15	4	-1.82616
2021/06/08 13:55:42	ETH-1	467	STD	44	23643.8	23997.9	-170.129	-170.386	97	1.54136	0.00218131	5.9663	-2.72001	0.00286445	4.45646	0.00212326	10.6847	0.00290377	20.2227	0.0485666	-1.23439	0.174545	2.18648	-25.1286	0.00192428	14.6001	0.0197341	-0.541838	-0.444037	0.106299	STD	0.2052	non ETH-3	0.785151	-3	2	0.243312	0.243312	1.03528	-0.0214829	0.230413	0.230413	-2.19	0.530007	line2	0.530007	-15	3
2021/06/08 14:32:26	ETH-2	467	STD	45	16708.2	16599.2	-130.764	-130.279	81	-10.905	0.00201892	-11.4321	-19.9682	0.00259182	-7.81035	0.001941	-6.80485	0.00262639	-14.1836	0.0591972	-0.628835	-14.9586	2.56896	6.72456	-0.0371729	-15.3139	0.0187863	-0.629661	-0.529837	0.109112	STD	0.2085	non ETH-3	0.785151	-3	1	0.15549	0.15549	1.03528	-0.0214829	0.139492	0.139492	-18.69	1.27821	1.27821	line1	-15	2	-19.5665
2021/06/08 15:06:58	ETH-3	467	STD	46	18584.8	18704.7	-142.33	-142.595	89	1.31041	0.00181343	6.57922	-2.11238	0.00220668	4.26138	0.00175287	11.2994	0.00223681	21.8059	0.0538062	-0.900178	15.6834	2.72874	-10.9895	0.0401677	15.3588	0.0212655	-0.191846	-0.09	0.119931	STD	0.6132	0.805046	0.802012	-3	0	0.610166	0.610166	1.03528	-0.0214829	0.610207	0.610207	-1.78	0.332376	line2	0.332376	-15	1
2021/06/08 18:05:48	ETH-2	468	STD	2	24743.3	25040.9	-175.845	-175.744	95	-10.8556	0.00250521	-11.2864	-19.8237	0.00411852	-7.75898	0.00246765	-6.65844	0.00417424	-14.0704	0.0449288	-0.8087	-24.912	2.22697	-3.79181	-0.0563414	-15.0533	0.0158457	-0.563373	-0.49936	0.0799269	STD	0.2085	non ETH-3	0.815352	-1	3	0.25198	0.25198	1.03528	-0.0214829	0.239386	0.239386	-18.69	1.13371	line2	1.13371	-15	15
2021/06/08 19:19:07	ETH-3	468	STD	4	21337.3	21815.7	-157.518	-159.273	94	1.00857	0.00143699	5.85178	-2.83354	0.00217814	3.95327	0.00139193	10.5686	0.00220706	20.3057	0.0545986	-0.923588	8.25165	1.89038	-16.5086	0.0192598	14.3058	0.0199528	-0.202152	-0.09	0.120975	STD	0.6132	0.815352	0.815352	-3	3	0.6132	0.6132	1.03528	-0.0214829	0.613348	0.613348	-1.78	1.05354	line2	1.05354	-15	15
2021/06/08 23:35:04	ETH-1	468	STD	12	18072.1	18285	-139.754	-140.55	89	1.41931	0.00195269	5.95548	-2.73074	0.00229922	4.34173	0.00187464	10.6736	0.00233013	20.3898	0.0580045	-1.04873	28.8486	3.48756	2.96388	0.0624761	14.4515	0.0216174	-0.559674	-0.442298	0.125932	STD	0.2052	non ETH-3	0.827932	-3	3	0.268258	0.268258	1.03528	-0.0214829	0.256239	0.256239	-2.19	0.540736	line2	0.540736	-15	15
2021/06/09 00:07:15	ETH-3	468	STD	13	14565.7	14608.6	-117.499	-118.613	90	1.3258	0.00125232	6.58243	-2.1092	0.00272542	4.2759	0.00117726	11.3027	0.00275941	22.2018	0.0680991	-0.519437	43.1633	3.095	15.747	0.0914684	15.3539	0.0225396	-0.214732	-0.0997354	0.136268	STD	0.6132	0.827932	0.828545	-3	3	0.613813	0.613813	1.03528	-0.0214829	0.613983	0.613983	-1.78	0.329202	0.329202	line1	-15	15	-1.52477
2021/06/09 01:50:11	ETH-3	468	STD	16	13596.6	13259.3	-111.748	-109.297	88	1.29742	0.0026401	6.59236	-2.09935	0.00345787	4.24966	0.00255415	11.3126	0.00350462	21.9701	0.0698108	-0.765588	47.27	5.70491	19.7533	0.0997114	15.3351	0.0200957	-0.215958	-0.11987	0.107407	STD	0.6132	0.829158	0.828545	-3	3	0.612587	0.612587	1.03528	-0.0214829	0.612714	0.612714	-1.78	0.31935	line2	0.31935	-15	15
2021/06/09 04:38:31	ETH-2	468	STD	21	13248.7	13088.5	-109.311	-108.349	88	-10.5883	0.00250913	-10.6113	-19.1545	0.00234829	-7.48503	0.00239781	-5.98031	0.00238053	-12.6475	0.0730249	-0.731393	10.8772	4.45107	31.0851	0.0224782	-14.1508	0.0215873	-0.60327	-0.53314	0.133126	STD	0.2085	non ETH-3	0.827878	-3	3	0.224609	0.224609	1.03528	-0.0214829	0.211049	0.211049	-18.69	0.464488	0.464488	line1	-15	15	-18.8174
2021/06/09 05:11:59	ETH-3	468	STD	22	14366	14426.9	-116.496	-116.977	83	1.29114	0.00184364	6.53274	-2.15846	0.00233824	4.2417	0.00176142	11.2527	0.00236894	21.7802	0.0692624	-0.832993	41.1939	3.46004	13.9643	0.0866215	15.269	0.0176223	-0.214678	-0.131057	0.105452	STD	0.6132	0.827878	0.807308	-3	3	0.59263	0.59263	1.03528	-0.0214829	0.592053	0.592053	-1.78	0.37846	line2	0.37846	-15	15
2021/06/09 06:53:12	ETH-3	468	STD	25	20357.7	20521	-152.293	-152.702	98	1.28708	0.00191513	6.50863	-2.18237	0.00225054	4.23706	0.00185078	11.2285	0.00228145	21.5569	0.0567094	-1.00356	13.7033	2.56384	-12.7561	0.0311255	15.2821	0.0212817	-0.173538	0.0301215	0.122796	STD	0.6132	0.786738	0.807308	-3	3	0.63377	0.63377	1.03528	-0.0214829	0.634644	0.634644	-1.78	0.402365	0.402365	line1	-15	15	-1.84527
2021/06/09 07:30:13	Merck	468	NW	26	15639.2	14949.2	-124.233	-120.103	81	-42.3502	0.003262	-7.4644	-16.0347	0.00481128	-37.1359	0.00319766	-2.88867	0.00487699	-6.45935	0.0620204	-0.694705	-16.4118	4.96714	29.9516	-0.0347803	-41.3744	0.0220643	-0.346933	-0.09	0.116103	sample	sample	non ETH-3	0.786738	-3	3	0.439805	sample	1.03528	-0.0214829	0.433837	0.433837	sample	sample	line2	sample	-15	15
2021/06/09 10:21:58	ETH-3	468	STD	31	21917.8	22372.8	-160.538	-162.201	95	1.34283	0.00232758	6.76085	-1.93232	0.00240533	4.29806	0.00222404	11.4818	0.00243778	22.0773	0.0555475	-0.995098	8.07657	2.53475	-18.7824	0.0195852	15.7003	0.0164669	-0.0706139	-0.0486835	0.0938748	STD	0.6132	0.683814	0.679412	-3	3	0.608799	0.608799	1.03528	-0.0214829	0.608792	0.608792	-1.78	0.152323	0.152323	line1	-15	15	-1.57339
2021/06/09 12:03:31	ETH-3	468	STD	34	18050.1	18140.2	-139.276	-139.103	97	1.505	0.00211232	7.08692	-1.60906	0.00234916	4.46135	0.00203336	11.8094	0.00238134	22.9128	0.0572556	-0.825858	26.9987	2.75248	-1.1735	0.0589366	16.2031	0.0200185	-0.061811	-0.0177422	0.114169	STD	0.6132	0.675011	0.679412	-3	3	0.617601	0.617601	1.03528	-0.0214829	0.617905	0.617905	-1.78	-0.170936	line2	-0.170936	-15	15
2021/06/09 17:09:10	ETH-3	468	STD	43	14718.1	14621.1	-118.356	-117.9	96	1.31204	0.00206394	6.61595	-2.07597	0.00200575	4.26418	0.00195371	11.3363	0.00203192	22.0895	0.0766626	-0.695736	23.3357	3.05773	-3.61232	0.0504689	15.3401	0.0177424	-0.248966	0.118227	0.10966	STD	0.6132	0.862166	0.862166	-3	3	0.6132	0.6132	1.03528	-0.0214829	0.613348	0.613348	-1.78	0.295968	0.295968	line1	-15	15	-1.68722
2021/06/09 17:45:28	ETH-1	468	STD	44	23978.3	24538.2	-170.955	-172.624	89	1.53816	0.00201034	6.01838	-2.66838	0.00301259	4.45527	0.00197091	10.737	0.00305363	20.4354	0.0576018	-1.12943	-6.4939	1.96447	-31.7255	-0.0139847	14.6146	0.0163202	-0.577127	-0.09	0.0883563	STD	0.2052	non ETH-3	0.862166	-3	2	0.285038	0.285038	1.03528	-0.0214829	0.27361	0.27361	-2.19	0.478378	line2	0.478378	-15	15
2021/06/09 18:19:49	ETH-2	468	STD	45	16855.9	16671.6	-131.295	-130.179	97	-10.591	0.00227023	-10.6265	-19.1695	0.00321753	-7.48809	0.00220219	-5.99555	0.00326077	-12.7236	0.0559463	-0.777833	-16.0452	3.59885	3.65789	-0.0344614	-14.1994	0.0171297	-0.634261	#DIV/0!	0.0992404	STD	0.2085	non ETH-3	0.862166	-3	1	0.227905	0.227905	1.03528	-0.0214829	0.214461	0.214461	-18.69	0.479535	0.479535	line1	-15	15	-18.7844
2021/06/10 12:22:26	ETH-2	469	STD	2	21227.9	21201.6	-157.625	-157.418	94	-10.6939	0.00224974	-10.8947	-19.4354	0.00320043	-7.59382	0.00218961	-6.26499	0.00324373	-13.2228	0.0613499	-0.741432	-3.30699	3.56097	17.3085	-0.00608973	-14.4394	0.019554	-0.501331	-0.502513	0.106946	STD	0.2085	non ETH-3	0.702374	-1	3	0.201043	0.201043	1.03528	-0.0214829	0.186652	0.186652	-18.69	0.74545	line2	0.74545	-1	15
2021/06/10 12:54:44	ETH-1	469	STD	3	15004.9	15023.6	-120.514	-121.327	80	1.52761	0.00172814	5.85268	-2.83265	0.00234765	4.43963	0.00161911	10.5706	0.00237683	20.3209	0.0638127	-0.912648	21.6801	3.19456	-3.92814	0.048358	14.4576	0.0193006	-0.554049	-0.555053	0.118668	STD	0.2052	non ETH-3	0.702374	-2	3	0.148325	0.148325	1.03528	-0.0214829	0.132075	0.132075	-2.19	0.642646	0.642646	line1	-2	15	-2.42692
2021/06/10 13:30:18	ETH-3	469	STD	4	18730.5	18908.2	-143.543	-143.974	92	1.17154	0.00173021	6.19762	-2.49069	0.00185316	4.11799	0.00164588	10.9161	0.0018776	20.9725	0.0508348	-0.957864	24.3232	3.51435	-1.68127	0.053784	14.9352	0.0206882	-0.0891737	-0.09	0.12122	STD	0.6132	0.702374	0.753243	-3	3	0.664069	0.664069	1.03528	-0.0214829	0.666012	0.666012	-1.78	0.710691	line2	0.710691	-4	15
2021/06/10 15:14:06	ETH-3	469	STD	7	18300	18530.6	-140.46	-141.84	93	1.28201	0.00178889	6.538	-2.15325	0.00237056	4.23333	0.0017041	11.258	0.00240131	21.6704	0.0561901	-0.950747	21.5194	2.78964	-5.19695	0.0473148	15.2896	0.0205105	-0.190911	-0.09	0.125138	STD	0.6132	0.804111	0.764578	-3	3	0.573667	0.573667	1.03528	-0.0214829	0.572421	0.572421	-1.78	0.373247	0.373247	line1	-7	15	-1.74752
2021/06/10 16:56:34	ETH-3	469	STD	10	16368.5	16361.6	-129.292	-128.94	88	1.32678	0.00184579	6.66593	-2.02642	0.00214705	4.27972	0.00177004	11.3865	0.00217587	22.0181	0.0489445	-0.864759	14.7935	3.51753	-12.0425	0.0318943	15.482	0.0225881	-0.17405	-0.09	0.134889	STD	0.6132	0.78725	0.813397	-3	3	0.639347	0.639347	1.03528	-0.0214829	0.640418	0.640418	-1.78	0.246422	line2	0.246422	-10	15
2021/06/10 18:05:53	ETH-1	469	STD	12	15552	15545.9	-123.468	-123.784	78	1.61081	0.001643	6.05252	-2.63453	0.00241473	4.52453	0.001581	10.7714	0.00244648	20.6681	0.0678544	-0.969661	23.8322	3.51246	-2.30958	0.0515333	14.701	0.0156562	-0.59657	-0.471467	0.0932507	STD	0.2052	non ETH-3	0.818039	-3	3	0.221469	0.221469	1.03528	-0.0214829	0.207799	0.207799	-2.19	0.444529	line2	0.444529	-12	15
2021/06/10 18:38:40	ETH-3	469	STD	13	16059.6	16084	-127.375	-127.349	90	1.29041	0.00122313	6.54406	-2.14724	0.00229167	4.24141	0.00118231	11.2641	0.00232134	21.9029	0.0571958	-0.735453	22.0378	3.40596	-4.71247	0.0473061	15.2587	0.0198503	-0.235629	-0.09	0.117249	STD	0.6132	0.848829	0.818039	-3	3	0.58241	0.58241	1.03528	-0.0214829	0.581473	0.581473	-1.78	0.367235	0.367235	line1	-13	15	-1.74151
2021/06/10 21:50:51	ETH-3	469	STD	19	14265.6	14092.7	-116.015	-114.919	76	1.21031	0.00213057	6.43268	-2.25765	0.00256101	4.16249	0.00204204	11.1521	0.00259517	21.5707	0.063698	-0.839099	21.401	3.8243	-5.03308	0.0458607	15.0471	0.0218564	-0.254074	0.0697903	0.130472	STD	0.6132	0.867274	0.84375	-3	2	0.589675	0.589675	1.03528	-0.0214829	0.588994	0.588994	-1.78	0.477651	0.477651	line1	-15	15	-1.85192
2021/06/10 22:44:02	ETH-2	469	STD	21	11088.5	10838.1	-94.181	-92.58	76	-10.5271	0.00233763	-10.439	-18.9836	0.00297645	-7.42172	0.00224824	-5.8072	0.00301623	-12.4425	0.0674054	-0.872035	-12.5142	4.32485	6.81291	-0.033456	-13.9756	0.0239921	-0.662484	-0.09	0.139222	STD	0.2085	non ETH-3	0.84375	-3	1	0.181265	0.181265	1.03528	-0.0214829	0.166177	0.166177	-18.69	0.293641	0.293641	line1	-15	15	-18.6253
2021/06/10 23:17:49	ETH-3	469	STD	22	18085	18228.8	-139.263	-139.971	86	1.28711	0.00170809	6.50386	-2.18709	0.00265513	4.23692	0.0016617	11.2237	0.00269055	21.4894	0.0559071	-1.06009	18.3759	3.27563	-8.19621	0.0398316	15.2432	0.0194613	-0.207025	#DIV/0!	0.107172	STD	0.6132	0.820225	0.84375	-3	0	0.636725	0.636725	1.03528	-0.0214829	0.637703	0.637703	-1.78	0.407089	line2	0.407089	-15	15
2021/06/11 18:49:26	ETH-2	470	STD	2	23630.5	23839.8	-169.966	-170.591	99	-10.5857	0.00192062	-10.6286	-19.1716	0.00381157	-7.48323	0.00190571	-5.9976	0.00386226	-12.4811	0.0634257	-0.528278	-4.97915	1.81451	14.9448	-0.0141511	-14.1497	0.0192368	-0.586875	-0.549787	0.118487	STD	0.2085	non ETH-3	0.886931	-1	5	0.300056	0.300056	1.03528	-0.0214829	0.289158	0.289158	-18.69	0.481577	line2	0.481577	-15	15
2021/06/11 21:26:06	ETH-3	470	STD	7	15540.5	15588.7	-123.531	-123.998	78	1.34125	0.00179286	6.63211	-2.05995	0.00237228	4.2921	0.00171648	11.3526	0.00240346	21.3635	0.0777068	-1.43773	24.4435	3.88901	-2.59493	0.0648017	15.3602	0.0208159	-0.273731	-389.132	0.120132	STD	0.6132	0.886931	0.869737	-3	3	0.596006	0.596006	1.03528	-0.0214829	0.595547	0.595547	-1.78	0.279951	0.279951	line1	-15	15	-1.70533
2021/06/11 23:03:24	ETH-3	470	STD	10	19088.9	19529.2	-145.08	-147.493	90	1.27214	0.00154018	6.56953	-2.12199	0.00264553	4.22517	0.00149533	11.2896	0.00268028	21.5193	0.0600117	-1.16098	16.3293	2.38146	-10.3036	0.0420626	15.2631	0.0130004	-0.239342	-291.676	0.0728465	STD	0.6132	0.852542	0.869737	-3	3	0.630394	0.630394	1.03528	-0.0214829	0.631149	0.631149	-1.78	0.341991	line2	0.341991	-15	15
2021/06/12 02:13:29	ETH-3	470	STD	16	17571.9	17746.6	-135.812	-136.754	84	1.28658	0.00216863	6.64644	-2.04574	0.00208636	4.24138	0.00207265	11.3669	0.00211487	21.8436	0.0734646	-0.996525	24.3022	3.60119	-2.70667	0.0592861	15.4057	0.0201986	-0.190697	-0.0964278	0.117626	STD	0.6132	0.803897	0.803897	-3	3	0.6132	0.6132	1.03528	-0.0214829	0.613348	0.613348	-1.78	0.265744	line2	0.265744	-15	15
2021/06/12 05:24:13	ETH-3	470	STD	22	18755.6	18764.5	-142.926	-143.252	87	1.30848	0.00187463	6.64284	-2.04932	0.00225668	4.26178	0.00179243	11.3633	0.00228655	21.7045	0.072428	-1.12542	15.3477	2.81205	-11.4394	0.03654	15.3665	0.019285	-0.246729	-0.09	0.116271	STD	0.6132	0.859929	0.859929	-3	3	0.6132	0.6132	1.03528	-0.0214829	0.613348	0.613348	-1.78	0.269315	line2	0.269315	-15	15
2021/06/12 07:10:43	Merck	470	TA	26	12582.7	11853.7	-104.178	-99.533	86	-42.4584	0.00330767	-7.49663	-16.0667	0.00455492	-37.2384	0.00322213	-2.92124	0.00461703	-6.75516	0.0856355	-0.926975	-42.8899	4.27142	2.40389	-0.114895	-41.581	0.0286983	-0.420393	-18.4444	0.16886	sample	sample	non ETH-3	0.859929	-3	1	0.439536	sample	1.03528	-0.0214829	0.368098	0.368098	sample	sample	line2	sample	-15	15
2021/06/14 18:14:43	ETH-2	471	STD	2	19062.6	19036.6	-143.896	-143.615	88	-10.4781	0.00243353	-10.3858	-18.9309	0.00354874	-7.37391	0.00235705	-5.75373	0.00359608	-11.9319	0.0671297	-0.462892	7.42412	3.0746	26.9803	0.018971	-13.7799	0.0190838	-0.566707	-0.469177	0.102788	STD	0.2085	non ETH-3	0.895016	-1	3	0.328309	0.328309	1.03528	-0.0214829	0.318407	0.318407	-18.69	0.24093	line2	0.24093	-15	15
2021/06/14 18:47:40	ETH-1	471	STD	3	17245.4	17457.6	-133.266	-134.657	84	1.70018	0.00145925	6.37136	-2.31844	0.00218307	4.61935	0.00138255	11.0916	0.00221082	21.2593	0.0643419	-1.02407	22.0718	2.24472	-4.74445	0.0531923	15.1028	0.0167335	-0.609463	-0.46479	0.10406	STD	0.2052	non ETH-3	0.895016	-2	3	0.285553	0.285553	1.03528	-0.0214829	0.274143	0.274143	-2.19	0.128444	0.128444	line1	-15	15	-2.27616
2021/06/14 19:20:14	ETH-3	471	STD	4	11595.2	11373.4	-97.231	-95.2955	78	1.44871	0.0015041	6.94605	-1.74872	0.00264095	4.40371	0.0014403	11.6679	0.00267486	22.4848	0.076749	-0.964493	32.6494	2.95207	4.65987	0.0815429	15.7797	0.0231246	-0.281816	-0.09	0.138292	STD	0.6132	0.895016	0.892908	-3	3	0.611093	0.611093	1.03528	-0.0214829	0.611167	0.611167	-1.78	-0.031283	line2	-0.031283	-15	15
2021/06/14 21:03:02	ETH-3	471	STD	7	10079	9886.57	-86.166	-84.9125	95	1.41986	0.00185215	6.91729	-1.77723	0.00264366	4.37568	0.00173923	11.639	0.00267669	22.1608	0.0851746	-1.22401	27.524	4.2234	-0.240677	0.0693564	15.7261	0.0237178	-0.277601	-0.09	0.147154	STD	0.6132	0.890801	0.882344	-3	3	0.604744	0.604744	1.03528	-0.0214829	0.604594	0.604594	-1.78	-0.00277161	-0.00277161	line1	-15	15	-1.7402
2021/06/14 21:35:33	Merck	471	NW	8	17494.5	16969.2	-134.861	-131.392	85	-42.2823	0.00239294	-7.13459	-15.7078	0.00318563	-37.0608	0.00232547	-2.55748	0.00322907	-5.73983	0.0562696	-0.635001	-15.433	3.74098	30.2199	-0.0353937	-40.9992	0.0182545	-0.362394	-0.184655	0.104844	sample	sample	non ETH-3	0.876009	-3	3	0.513614	sample	1.03528	-0.0214829	0.51025	0.51025	sample	sample	line2	sample	-15	15
2021/06/14 22:41:39	ETH-3	471	STD	10	15885.4	15954.1	-125.043	-125.305	81	1.41402	0.00150581	6.93461	-1.76006	0.00235615	4.37081	0.00140849	11.6564	0.00238535	22.5595	0.0557212	-0.868719	30.1708	3.0036	2.30604	0.0694937	15.7683	0.0181969	-0.248016	-0.09	0.114053	STD	0.6132	0.861216	0.85848	-3	3	0.610463	0.610463	1.03528	-0.0214829	0.610515	0.610515	-1.78	-0.0199444	line2	-0.0199444	-15	15
2021/06/14 23:54:44	ETH-1	471	STD	12	16278.3	16438.6	-127.252	-127.873	83	1.68843	0.00173054	6.37454	-2.31529	0.00247553	4.60845	0.0016334	11.0948	0.00250681	21.1916	0.0571681	-1.09661	29.5856	3.55823	2.57731	0.0676155	15.0708	0.0212813	-0.632916	-0.500095	0.12759	STD	0.2052	non ETH-3	0.842319	-3	3	0.209404	0.209404	1.03528	-0.0214829	0.195308	0.195308	-2.19	0.125293	line2	0.125293	-15	15
2021/06/15 00:27:28	ETH-3	471	STD	13	20336	20457.2	-149.966	-151.226	92	1.467	0.00158687	6.91331	-1.78118	0.00226001	4.41971	0.00152449	11.6351	0.00228971	22.5276	0.05055	-0.857842	15.3212	2.03516	-12.1525	0.0363886	15.8367	0.0158292	-0.210222	-0.09	0.0961508	STD	0.6132	0.823422	0.831328	-3	3	0.621105	0.621105	1.03528	-0.0214829	0.621532	0.621532	-1.78	0.0011808	0.0011808	line1	-15	15	-1.74505
2021/06/15 02:09:46	ETH-3	471	STD	16	20381.4	20596.1	-151.019	-151.995	96	1.42859	0.00221941	6.85405	-1.83993	0.0027368	4.38166	0.00214751	11.5755	0.00277419	22.1694	0.0540764	-1.09024	23.2472	2.91197	-4.28587	0.054291	15.7525	0.0173854	-0.196144	-0.09	0.0998273	STD	0.6132	0.809344	0.821072	-3	3	0.624928	0.624928	1.03528	-0.0214829	0.62549	0.62549	-1.78	0.059929	line2	0.059929	-15	15
2021/06/15 03:48:52	ETH-3	471	STD	19	11703.9	11539.8	-97.513	-96.5785	79	1.46138	0.00225857	6.89307	-1.80125	0.00332978	4.41374	0.00218589	11.6148	0.00337407	22.3608	0.0949133	-0.980675	37.2979	4.79573	9.27501	0.0857926	15.8033	0.0174663	-0.21725	-0.09	0.0997528	STD	0.6132	0.83045	0.816514	-3	3	0.599265	0.599265	1.03528	-0.0214829	0.598921	0.598921	-1.78	0.0212458	0.0212458	line1	-15	15	-1.78819
2021/06/15 05:32:24	ETH-3	471	STD	22	15383	15461.9	-121.348	-122.181	84	1.35001	0.00283057	6.56634	-2.12515	0.00585147	4.29803	0.00281102	11.2866	0.00592897	21.8487	0.0604322	-0.832959	38.8694	4.50039	11.5724	0.0859942	15.3796	0.0217025	-0.196549	-0.09	0.113622	STD	0.6132	0.809749	0.813433	-3	3	0.616883	0.616883	1.03528	-0.0214829	0.617162	0.617162	-1.78	0.345146	line2	0.345146	-15	15
2021/06/15 06:38:49	IAEA-C2	471	NW	24	17722	17709.2	-135.633	-135.562	89	-8.53078	0.00183464	-0.61424	-9.24373	0.00241507	-5.20967	0.00176011	4.05839	0.002447	7.36709	0.0616775	-0.760028	2.47041	2.72249	0.0756907	0.00605261	-1.60351	0.020558	-0.197592	-0.0974762	0.121138	sample	sample	non ETH-3	0.804924	-3	3	0.607332	sample	1.03528	-0.0214829	0.607274	0.607274	sample	sample	line2	sample	-15	15
2021/06/15 07:11:45	ETH-3	471	STD	25	19085.3	19546.7	-143.585	-145.922	97	1.42344	0.00140131	6.88166	-1.81256	0.00252053	4.37779	0.00134782	11.6032	0.00255305	22.524	0.0552108	-0.798433	15.9793	1.92844	-11.4069	0.0364919	15.7852	0.0152298	-0.186899	-0.09	0.0982541	STD	0.6132	0.800099	0.804924	-3	3	0.618025	0.618025	1.03528	-0.0214829	0.618344	0.618344	-1.78	0.0325571	0.0325571	line1	-15	15	-1.78678
2021/06/15 15:01:37	ETH-3	471	STD	37	19495.9	19503.2	-145.643	-145.734	94	1.44081	0.00194305	6.86594	-1.82813	0.00311464	4.39352	0.00190616	11.5875	0.00315665	22.4569	0.059133	-0.832882	37.5417	2.67141	9.58783	0.0874427	15.7858	0.0182319	-0.1872	-0.0848019	0.10264	STD	0.6132	0.8004	0.792612	-3	3	0.605411	0.605411	1.03528	-0.0214829	0.605285	0.605285	-1.78	0.0481337	0.0481337	line1	-15	15	-1.82068
2021/06/15 16:42:06	ETH-3	471	STD	40	17056.3	17274.2	-131.68	-132.857	96	1.41207	0.00140901	6.90591	-1.78851	0.002656	4.36798	0.00135174	11.6276	0.00269004	22.8028	0.0627211	-0.574031	43.2419	1.90181	15.0835	0.0989284	15.8145	0.0172174	-0.171623	-0.11801	0.101795	STD	0.6132	0.784823	0.789727	-3	3	0.618104	0.618104	1.03528	-0.0214829	0.618426	0.618426	-1.78	0.00850866	line2	0.00850866	-15	15
2021/06/15 18:25:25	ETH-3	471	STD	43	19579.3	19898.8	-145.888	-147.764	97	1.44654	0.00157494	6.96424	-1.73068	0.00250162	4.4023	0.00151502	11.6862	0.00253423	22.7085	0.0573191	-0.782029	30.8067	2.70654	2.83292	0.0719536	15.9091	0.0188262	-0.170758	0.156371	0.108024	STD	0.6132	0.783958	0.815777	-3	3	0.645019	0.645019	1.03528	-0.0214829	0.64629	0.64629	-1.78	-0.049319	-0.049319	line1	-15	15	-1.72825
2021/06/15 18:59:47	ETH-1	471	STD	44	14743.6	14751.5	-117.628	-117.292	85	1.72252	0.00203339	6.44578	-2.24467	0.00197788	4.64287	0.00193152	11.1664	0.00200411	21.5422	0.0641666	-0.89507	44.0167	3.29317	16.4514	0.0998844	15.2515	0.0204355	-0.559823	-0.09	0.122695	STD	0.2052	non ETH-3	0.831255	-3	2	0.271432	0.271432	1.03528	-0.0214829	0.259524	0.259524	-2.19	0.0546715	line2	0.0546715	-15	15
2021/06/15 19:32:44	ETH-2	471	STD	45	20521.1	20893.2	-150.979	-152.894	93	-10.4452	0.00154824	-10.2553	-18.8016	0.00255263	-7.33861	0.00150383	-5.62268	0.00258634	-11.8951	0.0500746	-0.689123	-8.54546	2.23505	10.4012	-0.0189418	-13.636	0.0189885	-0.587004	#DIV/0!	0.116656	STD	0.2085	non ETH-3	0.831255	-3	1	0.244251	0.244251	1.03528	-0.0214829	0.231384	0.231384	-18.69	0.111568	0.111568	line1	-15	15	-18.8271
2021/06/15 20:05:43	ETH-3	471	STD	46	21383.4	21959.7	-155.461	-158.27	97	1.43088	0.00163029	6.89883	-1.79553	0.00241851	4.38536	0.00155969	11.6205	0.00244989	22.4594	0.0533939	-0.895646	24.0711	1.90471	-3.57468	0.0572417	15.7304	0.0137985	-0.265351	#DIV/0!	0.0803506	STD	0.6132	0.878551	0.831255	-3	0	0.565904	0.565904	1.03528	-0.0214829	0.564384	0.564384	-1.78	0.0155304	line2	0.0155304	-15	15
2021-06-16 11:44:29	ETH-3	472	STD	1	19589.6	19636.2	-144.871	-145.621	87	1.51444	0.00283109	7.04383	-1.65178	0.00366344	4.46869	0.00276648	11.7662	0.00371439	22.8502	0.0579078	-0.801661	42.4713	4.81751	13.9506	0.0985977	16.1981	0.0248811	-0.0322559	-0.09	0.12727	STD	0.6132	0.645456	0.70561	0	3	0.673354	0.673354	1.03528	-0.0214829	0.675625	0.675625	-1.78	-0.12822	-0.12822	line1	-15	15	-1.67733
2021-06-16 12:19:12	ETH-2	472	STD	2	21138.4	20862.6	-154.083	-151.948	95	-10.3901	0.00216747	-10.137	-18.6843	0.00286676	-7.28283	0.00210225	-5.50379	0.0029057	-11.7066	0.0532163	-0.737464	-15.3345	2.92638	3.18621	-0.0341158	-13.3948	0.0185077	-0.518133	-0.535774	0.102909	STD	0.2085	non ETH-3	0.70561	-1	3	0.187477	0.187477	1.03528	-0.0214829	0.172608	0.172608	-18.69	-0.00574871	line2	-0.00574871	-15	15
2021-06-16 12:54:14	ETH-1	472	STD	3	16922.7	16966.5	-129.362	-130.136	79	1.81237	0.00170904	6.47068	-2.21999	0.00207792	4.72792	0.00162775	11.1915	0.00210507	21.4892	0.0621933	-0.996708	22.9567	3.10439	-4.19119	0.0528214	15.3772	0.0189374	-0.547897	-0.525435	0.111721	STD	0.2052	non ETH-3	0.70561	-2	3	0.157713	0.157713	1.03528	-0.0214829	0.141794	0.141794	-2.19	0.0299883	0.0299883	line1	-15	15	-2.24554
2021-06-16 13:27:34	ETH-3	472	STD	4	19775.4	19756	-145.903	-146.166	91	1.52434	0.00167004	7.11831	-1.57794	0.00228152	4.48056	0.00159979	11.841	0.00231145	22.842	0.067319	-0.957293	17.4085	2.77742	-10.5815	0.0415806	16.1621	0.0203382	-0.152564	-0.09	0.120272	STD	0.6132	0.765764	0.70561	-3	3	0.553046	0.553046	1.03528	-0.0214829	0.551072	0.551072	-1.78	-0.202055	line2	-0.202055	-15	15
2021-06-16 16:54:16	ETH-3	472	STD	10	17192.5	17370	-131.594	-132.927	83	1.57804	0.0024939	7.11907	-1.5772	0.00242859	4.5309	0.00238328	11.8419	0.00246168	22.8618	0.0534638	-0.939698	40.8852	4.47437	12.1932	0.095414	16.2415	0.0205634	-0.126977	-0.09	0.116769	STD	0.6132	0.740177	0.799263	-3	3	0.672286	0.672286	1.03528	-0.0214829	0.674519	0.674519	-1.78	-0.202803	line2	-0.202803	-15	15
2021-06-16 18:07:39	ETH-1	472	STD	12	19809.7	19802.9	-146.233	-146.133	91	1.83967	0.00182216	6.6082	-2.08365	0.00249017	4.75829	0.0017805	11.3296	0.00252442	21.6084	0.0604522	-1.15296	18.9797	2.56979	-8.36091	0.0454646	15.4977	0.0229319	-0.594636	-0.478877	0.131786	STD	0.2052	non ETH-3	0.799263	-3	3	0.204627	0.204627	1.03528	-0.0214829	0.190363	0.190363	-2.19	-0.106346	line2	-0.106346	-15	15
2021-06-16 18:40:47	ETH-3	472	STD	13	20783.9	21191.8	-151.634	-153.418	94	1.5115	0.00196878	7.08138	-1.61456	0.00197827	4.46725	0.00187569	11.8039	0.00200473	22.6801	0.0495521	-1.04227	11.1366	2.14922	-16.596	0.0274318	16.0174	0.0174466	-0.245149	-0.09	0.104482	STD	0.6132	0.858349	0.819794	-3	3	0.574645	0.574645	1.03528	-0.0214829	0.573433	0.573433	-1.78	-0.165444	-0.165444	line1	-15	15	-1.68366
2021-06-16 20:24:22	ETH-3	472	STD	16	15448.5	15463.8	-120.706	-120.889	78	1.50668	0.00213749	7.07278	-1.62308	0.00228537	4.46243	0.00203373	11.7953	0.00231554	22.8914	0.0718807	-0.81878	35.6036	3.42428	7.22188	0.0823287	16.0013	0.0167846	-0.247656	-0.09	0.0993367	STD	0.6132	0.860856	0.844768	-3	3	0.597112	0.597112	1.03528	-0.0214829	0.596692	0.596692	-1.78	-0.156921	line2	-0.156921	-15	15
2021-06-16 21:34:38	IAEA-C2	472	RP	18	18192.9	18235.8	-137.539	-137.368	81	-8.35817	0.00214347	-0.244856	-8.87753	0.00263204	-5.0351	0.00206163	4.42952	0.0026674	7.92833	0.0511338	-0.942009	3.99151	2.889	0.678613	0.00987265	-1.05884	0.0177127	-0.19655	-0.0693992	0.100773	sample	sample	non ETH-3	0.837977	-3	3	0.641427	sample	1.03528	-0.0214829	0.603197	0.603197	sample	sample	line2	sample	-15	15
2021-06-16 22:09:22	ETH-3	472	STD	19	16713.7	16940.6	-128.582	-130.049	84	1.48323	0.0018277	7.03749	-1.65807	0.00180578	4.43923	0.0017167	11.7598	0.00182848	22.7668	0.0622757	-0.870402	20.5106	2.84055	-7.36444	0.0472258	15.9886	0.019977	-0.201898	-0.09	0.11717	STD	0.6132	0.815098	0.824262	-3	3	0.622364	0.622364	1.03528	-0.0214829	0.622836	0.622836	-1.78	-0.121931	-0.121931	line1	-15	15	-1.79832
2021-06-16 23:18:30	ETH-2	472	STD	21	14911.8	14468.4	-117.803	-115.359	77	-10.3938	0.00233062	-10.1469	-18.6941	0.0039136	-7.28663	0.00228748	-5.51374	0.00396606	-11.7499	0.0734534	-0.76132	-1.25177	4.86548	17.5571	-0.00327272	-13.5182	0.02445	-0.62929	-0.529569	0.138425	STD	0.2085	non ETH-3	0.805965	-3	3	0.176676	0.176676	1.03528	-0.0214829	0.161425	0.161425	-18.69	0.00407357	0.00407357	line1	-15	15	-18.8343
2021-06-16 23:51:59	ETH-3	472	STD	22	16690.9	16777.3	-128.897	-129.476	77	1.51777	0.00192917	7.08175	-1.61419	0.00221133	4.47314	0.00183078	11.8043	0.00224005	22.7599	0.0625017	-0.965051	22.2123	3.38742	-5.83102	0.0509175	16.0865	0.0175805	-0.183633	-0.09	0.104832	STD	0.6132	0.796833	0.805708	-3	3	0.622075	0.622075	1.03528	-0.0214829	0.622537	0.622537	-1.78	-0.165809	line2	-0.165809	-15	15
2021-06-17 01:35:32	ETH-3	472	STD	25	15157.7	15334.8	-119.56	-120.411	90	1.53521	0.00153667	7.13014	-1.56622	0.00232388	4.49116	0.00143563	11.8529	0.0023526	23.0518	0.0633939	-0.775889	26.259	3.55364	-2.00858	0.0596533	16.1448	0.0161089	-0.191994	-0.09	0.0993767	STD	0.6132	0.805194	0.810386	-3	3	0.618392	0.618392	1.03528	-0.0214829	0.618724	0.618724	-1.78	-0.213781	-0.213781	line1	-15	15	-1.71145
2021-06-17 03:21:50	ETH-3	472	STD	28	16102.6	16240	-125.607	-126.505	78	1.4987	0.00118255	7.09955	-1.59654	0.0019993	4.45589	0.00111914	11.8221	0.00202455	22.9347	0.0660753	-0.829482	25.92	3.28331	-2.24119	0.0589441	16.0533	0.0183236	-0.215931	-0.09	0.113104	STD	0.6132	0.829131	0.815344	-3	3	0.599413	0.599413	1.03528	-0.0214829	0.599075	0.599075	-1.78	-0.18346	line2	-0.18346	-15	15
2021-06-17 05:08:11	ETH-3	472	STD	31	16895.3	16970.2	-130.179	-130.593	84	1.51567	0.00183586	7.12045	-1.57582	0.0024518	4.47251	0.00176235	11.8431	0.00248421	23.0109	0.0683576	-0.796618	26.4769	3.5978	-1.75825	0.0604383	16.1091	0.0212357	-0.198507	-0.09	0.129721	STD	0.6132	0.811707	0.805316	-3	3	0.606809	0.606809	1.03528	-0.0214829	0.606732	0.606732	-1.78	-0.204176	-0.204176	line1	-15	15	-1.71702
2021-06-17 06:53:10	ETH-3	472	STD	34	17788.8	17923.4	-134.915	-135.745	87	1.50429	0.00178593	7.06683	-1.62898	0.00215233	4.45999	0.00171289	11.7893	0.00218108	22.6467	0.0573486	-1.04595	22.1898	2.95532	-5.81019	0.0513033	16.08	0.019474	-0.16191	-0.09	0.112224	STD	0.6132	0.77511	0.778124	-3	3	0.616214	0.616214	1.03528	-0.0214829	0.616469	0.616469	-1.78	-0.15102	line2	-0.15102	-15	15
2021-06-17 08:40:22	ETH-3	472	STD	37	21767.5	21877.5	-157.174	-157.353	96	1.51185	0.00169199	7.08612	-1.60985	0.00225864	4.46774	0.00162118	11.8087	0.00228835	22.7389	0.0610095	-0.994228	14.0304	2.10584	-13.7911	0.0339721	16.1353	0.0180185	-0.134356	-0.09	0.102717	STD	0.6132	0.747556	0.761333	-3	3	0.626977	0.626977	1.03528	-0.0214829	0.627612	0.627612	-1.78	-0.170145	-0.170145	line1	-15	15	-1.77312
2021-06-17 12:11:49	ETH-2	472	STD	44	17912.6	17579.8	-136.39	-134.087	82	-10.5011	0.00302105	-10.5048	-19.0489	0.00619906	-7.3996	0.0030228	-5.87317	0.00628195	-12.4336	0.0575352	-0.730422	-14.9239	3.41211	4.46241	-0.0332606	-13.8513	0.0260886	-0.49432	-660.724	0.129487	STD	0.2085	non ETH-3	0.747556	-6	6	0.253236	0.253236	1.03528	-0.0214829	0.240686	0.240686	-18.69	0.358852	line2	0.358852	-15	15
2021-06-17 18:32:36	ETH-2	473	STD	2	16885.5	16705.2	-129.964	-128.982	92	-10.4677	0.0015488	-10.3021	-18.848	0.00251147	-7.36125	0.0014969	-5.66969	0.00254441	-11.8058	0.0589189	-0.504285	-0.54481	2.99577	18.674	-0.000899956	-13.6898	0.0209813	-0.571567	-0.527309	0.129359	STD	0.2085	non ETH-3	0.747556	-9	3	0.175989	0.175989	1.03528	-0.0214829	0.160714	0.160714	-18.69	0.157951	line2	0.157951	-15	15
2021-06-17 19:07:33	ETH-1	473	STD	3	21136.6	21565.5	-153.788	-155.502	93	1.82499	0.00199879	6.56644	-2.12505	0.0024356	4.74308	0.00191555	11.2877	0.00246801	21.7137	0.0627425	-0.967057	39.6959	2.34563	11.8983	0.0964271	15.5003	0.0187083	-0.535733	-0.499811	0.107116	STD	0.2052	non ETH-3	0.747556	-10	3	0.211823	0.211823	1.03528	-0.0214829	0.197812	0.197812	-2.19	-0.0649473	-0.0649473	line1	-15	15	-2.2426
2021-06-18 05:44:38	ETH-3	473	STD	21	19801.4	19877.8	-146.179	-146.41	91	1.53253	0.00229134	7.09294	-1.60309	0.00231429	4.48735	0.00220207	11.8155	0.00234639	22.7593	0.0649221	-0.987866	30.2403	3.52592	1.93942	0.0733699	16.1567	0.0176657	-0.140123	-0.0822924	0.101965	STD	0.6132	0.753323	0.771483	-3	3	0.63136	0.63136	1.03528	-0.0214829	0.632149	0.632149	-1.78	-0.176905	-0.176905	line1	-15	15	-1.69686
2021-06-18 06:18:22	IAEA-C2	473	TA	22	17235.3	16972.7	-131.993	-130.013	90	-8.36052	0.002194	-0.195092	-8.8282	0.00284829	-5.03558	0.00212047	4.47946	0.00288675	8.29813	0.0683511	-0.674853	22.3525	3.51007	18.8798	0.0522494	-0.963745	0.0190936	-0.149762	-0.09	0.110077	sample	sample	non ETH-3	0.771483	-3	3	0.62172	sample	1.03528	-0.0214829	0.652337	0.652337	sample	sample	line2	sample	-15	15
2021-06-18 07:28:09	ETH-3	473	STD	24	15410.3	15575.5	-121.207	-122.058	77	1.524	0.00191413	7.10735	-1.58881	0.00204251	4.47986	0.00179208	11.83	0.00206783	23.0738	0.0715987	-0.70923	37.9395	3.31441	9.40721	0.0872748	16.1262	0.016584	-0.176443	-0.110561	0.101887	STD	0.6132	0.789643	0.780211	-3	3	0.603768	0.603768	1.03528	-0.0214829	0.603583	0.603583	-1.78	-0.19119	line2	-0.19119	-15	15
2021-06-18 09:12:46	ETH-3	473	STD	27	17487.9	17496.1	-133.939	-133.5	85	1.53728	0.00212996	7.10442	-1.59172	0.00283834	4.4922	0.00204397	11.8271	0.00287583	22.8018	0.0700222	-0.969091	29.6085	3.47399	1.29741	0.0694591	16.128	0.0178939	-0.184467	0.144219	0.106027	STD	0.6132	0.797667	0.788908	-3	3	0.604442	0.604442	1.03528	-0.0214829	0.604281	0.604281	-1.78	-0.188284	-0.188284	line1	-15	15	-1.68548
2021-06-18 09:47:51	ETH-1	473	STD	28	20299.8	20692.5	-149.231	-150.659	97	1.83079	0.00172375	6.60104	-2.09075	0.00190597	4.74971	0.00165993	11.3224	0.00193214	21.4788	0.0491393	-1.2654	18.8058	2.27916	-8.50709	0.045723	15.5285	0.0162735	-0.548557	-0.09	0.0959393	STD	0.2052	non ETH-3	0.788541	-3	2	0.239984	0.239984	1.03528	-0.0214829	0.226967	0.226967	-2.19	-0.0992528	line2	-0.0992528	-15	15
2021-06-18 10:22:24	ETH-2	473	STD	29	21914.5	22240.1	-157.392	-158.904	93	-10.4073	0.00198881	-10.2274	-18.7739	0.00269226	-7.30211	0.00191952	-5.59457	0.00272826	-11.9331	0.0649153	-0.784069	-15.2196	2.38819	3.50432	-0.0355942	-13.5783	0.0180986	-0.594296	#DIV/0!	0.103358	STD	0.2085	non ETH-3	0.788541	-3	1	0.194245	0.194245	1.03528	-0.0214829	0.179615	0.179615	-18.69	0.0838848	0.0838848	line1	-15	15	-18.8677
2021-06-18 10:56:36	ETH-3	473	STD	30	20464.6	20873.7	-150.528	-151.732	92	1.47064	0.00172883	7.0028	-1.69246	0.00241483	4.42623	0.001659	11.7249	0.00244656	22.4613	0.0559829	-1.10006	17.3797	2.16628	-10.3292	0.0420171	15.9769	0.0183407	-0.166215	#DIV/0!	0.107471	STD	0.6132	0.779415	0.788541	-3	0	0.622326	0.622326	1.03528	-0.0214829	0.622796	0.622796	-1.78	-0.0875439	line2	-0.0875439	-15	15
2021-06-18 13:22:17	ETH-2	474	STD	2	19841.2	19831.9	-147.537	-146.987	91	-10.4562	0.0020759	-10.3151	-18.8608	0.00286841	-7.35098	0.00202	-5.68267	0.0029074	-12.1039	0.0486219	-0.77974	-6.20206	3.86908	12.9223	-0.0119109	-13.5981	0.0189977	-0.476535	-0.457333	0.107955	STD	0.2085	non ETH-3	0.779415	-3	3	0.302881	0.302881	1.03528	-0.0214829	0.292082	0.292082	-18.69	0.170796	line2	0.170796	-15	15
2021-06-19 02:41:37	IAEA-C2	474	NdW	26	13299.6	12860.7	-107.579	-104.344	90	-8.31674	0.00247249	-0.179881	-8.81312	0.003029	-4.99402	0.0023814	4.49482	0.00306988	8.53976	0.0725605	-0.465939	72.546	5.6065	68.8228	0.158711	-0.897745	0.0244841	-0.141826	-0.09	0.142941	sample	sample	non ETH-3	0.783933	-3	10	0.642107	sample	1.03528	-0.0214829	0.660672	0.660672	sample	sample	line2	sample	-15	15
2021-06-19 07:12:21	ETH-3	474	STD	34	20151.9	20292.5	-148.652	-148.242	105	1.53514	0.0019254	7.15506	-1.54151	0.00242696	4.49196	0.00186474	11.8779	0.00246008	22.8806	0.0604977	-0.992531	42.9256	3.2673	14.1485	0.0949415	16.1919	0.0177577	-0.170733	-0.0836385	0.0990002	STD	0.6132	0.783933	0.783933	-3	3	0.6132	0.6132	1.03528	-0.0214829	0.613348	0.613348	-1.78	-0.238487	line2	-0.238487	-15	15
2021-06-19 10:39:53	ETH-3	474	STD	40	20974.6	21335	-152.717	-153.607	96	1.4968	0.00154653	7.08808	-1.60791	0.00209691	4.45371	0.00146316	11.8106	0.00212361	22.7384	0.0565408	-0.998466	28.9071	2.35903	0.688553	0.0641638	16.1416	0.0159024	-0.115591	-4.76293	0.092741	STD	0.6132	0.728791	0.728791	-3	3	0.6132	0.6132	1.03528	-0.0214829	0.613348	0.613348	-1.78	-0.172089	line2	-0.172089	-15	15
2021-06-19 12:40:16	ETH-2	474	STD	44	23811.2	24212.9	-167.143	-168.269	102	-10.4396	0.00148911	-10.2285	-18.775	0.00261926	-7.33239	0.00144466	-5.59574	0.00265355	-12.025	0.0417691	-0.874672	-21.9798	1.56942	-3.34952	-0.0487838	-13.604	0.0203004	-0.58769	-1.99913	0.116584	STD	0.2085	non ETH-3	0.75973	-3	2	0.17204	0.17204	1.03528	-0.0214829	0.156627	0.156627	-18.69	0.0849639	line2	0.0849639	-15	15
2021-06-19 13:50:50	ETH-3	474	STD	46	17492.7	17660.5	-132.86	-133.803	95	1.55247	0.00179995	7.13485	-1.56155	0.0022604	4.5075	0.00172637	11.8576	0.00229043	22.9103	0.060843	-0.92357	34.5001	3.01279	5.9787	0.0746214	16.1813	0.0212301	-0.177469	#DIV/0!	0.121752	STD	0.6132	0.790669	0.790669	-3	0	0.6132	0.6132	1.03528	-0.0214829	0.613348	0.613348	-1.78	-0.218451	line2	-0.218451	-15	15
2021-06-21 12:16:06	ETH-3	475	STD	1	12708.2	12389	-100.94	-99.2555	90	1.37855	0.00135735	7.11971	-1.57656	0.00278091	4.344	0.0013043	11.8421	0.00281645	21.8751	0.0781258	-1.9039	49.0045	6.49415	20.2904	0.092197	16.0352	0.0222327	-0.138242	-0.09	0.13113	STD	0.6132	0.751442	0.718445	0	3	0.580203	0.580203	1.03528	-0.0214829	0.579187	0.579187	-1.78	-0.203438	-0.203438	line1	-15	15	-1.79619
2021-06-21 12:51:10	ETH-2	475	STD	2	19827.1	19840.5	-144.319	-144.275	87	-10.3768	0.00170655	-10.1289	-18.6762	0.0021297	-7.27008	0.00161458	-5.49566	0.00215694	-11.6759	0.0547897	-0.722784	-11.5843	2.23963	6.97752	-0.0209852	-13.3179	0.0164342	-0.461456	-0.435212	0.0994016	STD	0.2085	non ETH-3	0.718445	-1	3	0.256989	0.256989	1.03528	-0.0214829	0.244572	0.244572	-18.69	-0.0137507	line2	-0.0137507	-15	15
2021-06-21 13:58:55	ETH-3	475	STD	4	19631.9	19819.9	-143.475	-144.511	90	1.69325	0.00204371	7.36336	-1.33501	0.00193125	4.64735	0.00195085	12.0873	0.00195757	23.2084	0.0572939	-1.08584	47.1242	3.59191	17.6497	0.091397	16.661	0.0202944	-0.0722479	-0.09	0.117665	STD	0.6132	0.685448	0.737636	-3	3	0.665388	0.665388	1.03528	-0.0214829	0.667378	0.667378	-1.78	-0.444987	line2	-0.444987	-15	15
2021-06-21 15:42:40	ETH-3	475	STD	7	16172	16037.2	-123.62	-122.839	79	1.54779	0.00139699	7.13847	-1.55796	0.00228654	4.50323	0.00132166	11.8613	0.00231543	23.0699	0.0664877	-0.774819	30.9291	3.51908	2.50369	0.0601836	16.1953	0.0168222	-0.162819	-0.09	0.10413	STD	0.6132	0.776019	0.75164	-3	3	0.588821	0.588821	1.03528	-0.0214829	0.58811	0.58811	-1.78	-0.222041	-0.222041	line1	-15	15	-1.69037
2021-06-21 17:22:26	ETH-3	475	STD	10	16376.2	16549.3	-125.508	-125.89	79	1.52534	0.00175464	7.18103	-1.51577	0.00224799	4.48367	0.00164497	11.9039	0.00227599	23.1172	0.0574817	-0.812864	39.3165	3.093	10.5971	0.0771764	16.1993	0.0148113	-0.180254	-0.09	0.0922925	STD	0.6132	0.793454	0.778055	-3	3	0.597801	0.597801	1.03528	-0.0214829	0.597406	0.597406	-1.78	-0.264231	line2	-0.264231	-15	15
2021-06-21 18:33:26	ETH-1	475	STD	12	17140.3	17239.3	-129.544	-130.335	84	1.8481	0.00136547	6.66999	-2.0224	0.00217628	4.76834	0.00130585	11.3917	0.00220434	22.0739	0.0535445	-0.820414	25.8887	2.99406	-1.76808	0.0511006	15.5648	0.0163792	-0.599158	-0.528079	0.105057	STD	0.2052	non ETH-3	0.779073	-3	3	0.179915	0.179915	1.03528	-0.0214829	0.164779	0.164779	-2.19	-0.167602	line2	-0.167602	-15	15
2021-06-21 19:08:07	ETH-3	475	STD	13	18469.9	18664.3	-136.485	-137.868	83	1.54183	0.00162018	7.14993	-1.5466	0.00202603	4.49804	0.00153107	11.8728	0.00205185	22.9876	0.0511345	-0.877915	29.8673	2.57107	1.45452	0.059195	16.2128	0.020456	-0.151493	-0.09	0.11868	STD	0.6132	0.764693	0.817476	-3	3	0.665983	0.665983	1.03528	-0.0214829	0.667994	0.667994	-1.78	-0.233398	-0.233398	line1	-15	15	-1.6898
2021-06-21 20:56:00	ETH-3	475	STD	16	16005.3	15844.1	-122.806	-121.928	79	1.50838	0.0022489	7.10008	-1.59602	0.00274363	4.46497	0.00214708	11.8227	0.00277973	22.997	0.0795248	-0.769706	38.704	4.15395	10.1805	0.075576	15.9971	0.0223238	-0.281081	-0.09	0.129748	STD	0.6132	0.894281	0.825229	-3	3	0.544148	0.544148	1.03528	-0.0214829	0.541861	0.541861	-1.78	-0.183979	line2	-0.183979	-15	15
2021-06-21 22:37:00	ETH-3	475	STD	19	17230.5	17217	-130.302	-129.872	83	1.54633	0.00204192	7.11978	-1.57649	0.0021803	4.50121	0.00195671	11.8425	0.00220988	22.9875	0.0540824	-0.818271	28.2048	3.12409	-0.106961	0.0549759	16.1333	0.01777	-0.203515	-0.09	0.10645	STD	0.6132	0.816715	0.854071	-3	3	0.650556	0.650556	1.03528	-0.0214829	0.652023	0.652023	-1.78	-0.203508	-0.203508	line1	-15	15	-1.70764
2021-06-21 23:49:06	ETH-2	475	STD	21	19317.8	19345	-142.161	-142.077	86	-10.4287	0.00248707	-10.3449	-18.8903	0.00549453	-7.32619	0.00249544	-5.71253	0.00556749	-12.1133	0.0456403	-0.72919	-12.2194	3.48581	6.82124	-0.0230074	-13.7212	0.0249192	-0.597437	-0.46092	0.127206	STD	0.2085	non ETH-3	0.833966	-3	3	0.236529	0.236529	1.03528	-0.0214829	0.22339	0.22339	-18.69	0.200347	0.200347	line1	-15	15	-19.0418
2021-06-22 00:21:27	ETH-3	475	STD	22	16881.3	17044.5	-128.296	-129.468	82	1.5233	0.00112281	7.11513	-1.5811	0.00229454	4.47947	0.00105273	11.8378	0.00232308	23.0811	0.0645353	-0.717542	25.6909	2.84024	-2.5194	0.0501294	16.0709	0.0144295	-0.238018	-0.09	0.0878377	STD	0.6132	0.851218	0.831759	-3	3	0.593742	0.593742	1.03528	-0.0214829	0.593204	0.593204	-1.78	-0.198902	line2	-0.198902	-15	15
2021-06-22 00:56:36	Merck	475	TA	23	19839.7	19146.4	-145.401	-141.2	90	-42.2125	0.00292084	-6.94753	-15.5223	0.00338667	-36.9889	0.002839	-2.36958	0.00343418	-5.47724	0.0459915	-0.747573	-28.8078	4.16459	15.7676	-0.0552692	-40.6804	0.0226682	-0.292258	-0.152197	0.124501	sample	sample	non ETH-3	0.839282	-3	3	0.547024	sample	1.03528	-0.0214829	0.502676	0.502676	sample	sample	sample	line1	-15	15	-15.6596
2021-06-22 02:05:08	ETH-3	475	STD	25	15941.8	16044.7	-123.244	-123.636	78	1.54354	0.00183931	7.11338	-1.58283	0.0025346	4.49838	0.00173964	11.8361	0.00256682	23.1229	0.0711605	-0.67325	26.812	3.79744	-1.44609	0.052	16.1132	0.0179402	-0.214146	-0.09	0.106899	STD	0.6132	0.827346	0.818764	-3	3	0.604618	0.604618	1.03528	-0.0214829	0.604464	0.604464	-1.78	-0.197165	-0.197165	line1	-15	15	-1.72012
2021-06-22 03:48:37	ETH-3	475	STD	28	17146.2	17191.2	-129.714	-130.155	82	1.53495	0.00180624	7.09207	-1.60396	0.00207894	4.48959	0.00172508	11.8147	0.00210651	22.9855	0.0720623	-0.765153	27.1469	3.41058	-1.06941	0.0532402	16.1333	0.0179691	-0.164528	-0.09	0.107623	STD	0.6132	0.777728	0.802537	-3	3	0.638009	0.638009	1.03528	-0.0214829	0.639032	0.639032	-1.78	-0.176039	line2	-0.176039	-15	15
2021-06-22 06:26:38	IAEA-C2	475	TA	33	18458	18248.5	-137.744	-136.239	85	-8.33145	0.00150123	-0.218695	-8.8516	0.00253764	-5.00916	0.00145945	4.45583	0.0025711	8.21061	0.0602532	-0.714573	-2.07065	2.44138	-5.44213	-0.00368351	-0.978038	0.0148956	-0.168338	-1.55429	0.0929585	sample	sample	non ETH-3	0.812538	-3	3	0.6442	sample	1.03528	-0.0214829	0.632828	0.632828	sample	sample	sample	line1	-15	15	-8.9737
2021-06-22 07:02:04	ETH-3	475	STD	34	19062.5	19392.5	-141.249	-142.505	88	1.53896	0.00169037	7.14906	-1.54746	0.00180491	4.49532	0.00162001	11.8719	0.00182941	22.8972	0.0460406	-0.964404	13.1717	2.60094	-14.7762	0.0266782	16.1604	0.0186169	-0.199338	-0.854855	0.108116	STD	0.6132	0.812538	0.781572	-3	3	0.582234	0.582234	1.03528	-0.0214829	0.58129	0.58129	-1.78	-0.232537	line2	-0.232537	-15	15
2021-06-22 08:50:56	ETH-3	475	STD	37	19704.9	19916.6	-144.841	-145.105	90	1.53964	0.00170289	7.16939	-1.52731	0.00249725	4.49667	0.00163973	11.8923	0.00253013	22.9747	0.0600868	-0.929012	14.9667	2.73559	-13.0713	0.030751	16.2449	0.0203077	-0.137406	-0.10927	0.118954	STD	0.6132	0.750606	0.781572	-3	3	0.644166	0.644166	1.03528	-0.0214829	0.645407	0.645407	-1.78	-0.252694	-0.252694	line1	-15	15	-1.65074
2021-06-22 12:12:00	ETH-3	475	STD	43	18946	19076.5	-140.488	-140.966	88	1.46463	0.00193217	7.0072	-1.68809	0.00224918	4.42075	0.00185827	11.7293	0.00227965	22.7264	0.0560614	-0.849724	17.663	2.96979	-10.0566	0.0360771	16.0451	0.0185757	-0.0977151	-249.871	0.105523	STD	0.6132	0.710915	0.727098	-3	3	0.629383	0.629383	1.03528	-0.0214829	0.630102	0.630102	-1.78	-0.0919081	-0.0919081	line1	-15	15	-1.87403
2021-06-22 12:47:39	ETH-1	475	STD	44	19635.4	20039.6	-145.272	-145.93	86	1.84556	0.00173239	6.62143	-2.07053	0.00183191	4.76427	0.00163799	11.3429	0.00185553	21.6905	0.0529318	-1.09889	7.20772	2.60005	-19.8483	0.0153678	15.6129	0.0139915	-0.500317	-500.074	0.0801251	STD	0.2052	non ETH-3	0.727098	-3	2	0.226781	0.226781	1.03528	-0.0214829	0.213298	0.213298	-2.19	-0.119469	line2	-0.119469	-15	15
2021-06-22 13:54:26	ETH-3	475	STD	46	21256.9	21551	-152.742	-153.773	94	1.51949	0.00247678	7.08692	-1.60907	0.00299772	4.47493	0.00239843	11.8095	0.00303892	22.8951	0.0470661	-0.843251	35.879	3.96536	7.44803	0.0757423	16.1479	0.0195681	-0.130081	#DIV/0!	0.107325	STD	0.6132	0.743281	0.727098	-3	0	0.597017	0.597017	1.03528	-0.0214829	0.596594	0.596594	-1.78	-0.170931	line2	-0.170931	-15	15
2021-06-22 16:32:46	ETH-3	476	STD	1	20077.1	20208.7	-146.134	-147.528	84	1.53522	0.00271762	7.10384	-1.59229	0.00373927	4.49025	0.00265084	11.8265	0.00379042	22.9409	0.0586335	-0.832137	40.1494	5.4534	11.5505	0.091998	16.1359	0.0213811	-0.174172	-0.09	0.111573	STD	0.6132	0.787372	0.820148	0	3	0.645976	0.645976	1.03528	-0.0214829	0.64728	0.64728	-1.78	-0.187708	-0.187708	line1	-15	15	-1.77567
2021-06-22 17:06:40	ETH-2	476	STD	2	19201.5	19175.1	-141.815	-141.097	86	-10.3671	0.00190641	-10.0743	-18.6221	0.00242515	-7.25914	0.00182592	-5.44085	0.0024572	-11.692	0.0508941	-0.849175	-18.3552	2.25596	-0.0407092	-0.0415404	-13.4768	0.0179168	-0.68796	-0.581937	0.103986	STD	0.2085	non ETH-3	0.820148	-1	3	0.132188	0.132188	1.03528	-0.0214829	0.115368	0.115368	-18.69	-0.0678658	line2	-0.0678658	-15	15
2021-06-22 18:16:22	ETH-3	476	STD	4	12311	12075.4	-99.743	-98.2695	75	1.62997	0.00341874	7.24428	-1.45306	0.00731391	4.58391	0.00342375	11.9676	0.00741125	23.1631	0.0815518	-0.893884	17.8608	4.71865	-10.4951	0.0410281	16.3064	0.0222753	-0.239724	-0.09	0.123023	STD	0.6132	0.852924	0.830161	-3	3	0.590437	0.590437	1.03528	-0.0214829	0.589782	0.589782	-1.78	-0.326937	line2	-0.326937	-15	15
2021-06-22 20:06:37	ETH-3	476	STD	7	20741.3	21193.2	-149.975	-151.53	90	1.54074	0.00173328	7.12778	-1.56855	0.00189784	4.49626	0.00163704	11.8505	0.00192216	22.7053	0.0589789	-1.10965	3.90116	2.10983	-23.7513	0.00968573	16.1021	0.0195445	-0.236985	-0.09	0.118471	STD	0.6132	0.850185	0.852281	-3	3	0.615295	0.615295	1.03528	-0.0214829	0.615518	0.615518	-1.78	-0.211445	-0.211445	line1	-15	15	-1.72725
2021-06-22 21:53:10	ETH-3	476	STD	10	18386.4	18727.1	-137.092	-138.192	86	1.54354	0.00142678	7.16877	-1.52793	0.00191387	4.5003	0.00133816	11.8917	0.00193772	22.8088	0.0581881	-1.08989	14.0132	2.75637	-14.0008	0.0323766	16.1433	0.0157694	-0.240533	-0.09	0.0953939	STD	0.6132	0.853733	0.851034	-3	3	0.610501	0.610501	1.03528	-0.0214829	0.610554	0.610554	-1.78	-0.252075	line2	-0.252075	-15	15
2021-06-22 23:05:41	ETH-1	476	STD	12	20636.5	21045	-149.858	-151.381	90	1.83888	0.00189353	6.54473	-2.14657	0.00257336	4.75534	0.00180714	11.2659	0.00260682	21.473	0.0542776	-1.15951	4.84289	2.26621	-21.9941	0.0118119	15.4202	0.0234248	-0.605941	-0.458441	0.137409	STD	0.2052	non ETH-3	0.851458	-3	3	0.245517	0.245517	1.03528	-0.0214829	0.232695	0.232695	-2.19	-0.0434288	line2	-0.0434288	-15	15
2021-06-22 23:41:44	ETH-3	476	STD	13	21133.4	21692.7	-152.371	-154.06	94	1.52687	0.00203513	7.08914	-1.60686	0.00218268	4.48192	0.00194481	11.8117	0.00221197	22.441	0.0506857	-1.2912	4.62369	1.83763	-22.9602	0.0112486	16.0498	0.0186029	-0.235984	-0.09	0.117284	STD	0.6132	0.849184	0.841214	-3	3	0.60523	0.60523	1.03528	-0.0214829	0.605097	0.605097	-1.78	-0.173139	-0.173139	line1	-15	15	-1.74498
2021-06-23 01:31:20	ETH-3	476	STD	16	23073.7	23653.4	-162.093	-164.391	94	1.50437	0.00200359	7.02586	-1.66959	0.00248893	4.45864	0.00193839	11.7482	0.00252288	22.3575	0.0489525	-1.2473	-0.471351	2.57066	-27.7716	0.00023779	15.9917	0.0177507	-0.207524	-0.09	0.103833	STD	0.6132	0.820724	0.80911	-3	3	0.601586	0.601586	1.03528	-0.0214829	0.601325	0.601325	-1.78	-0.110406	line2	-0.110406	-15	15
2021-06-23 02:37:47	IAEA-C2	476	RP	18	15527	15589.2	-120.738	-121.06	78	-8.34757	0.00141773	-0.204981	-8.838	0.00190428	-5.02378	0.00134597	4.46956	0.00192875	8.41405	0.0681386	-0.540261	8.65562	3.22801	5.23671	0.0188355	-0.997189	0.0172696	-0.185774	-0.110451	0.105722	sample	sample	non ETH-3	0.789074	-3	3	0.603299	sample	1.03528	-0.0214829	0.614514	0.614514	sample	sample	line2	sample	-15	15
2021-06-23 03:13:47	ETH-3	476	STD	19	21275.4	21672.1	-153.661	-154.258	93	1.52293	0.00154317	7.06848	-1.62735	0.00169443	4.47751	0.00148691	11.791	0.00171777	22.4929	0.0596573	-1.19953	4.04045	2.28409	-23.4836	0.0100174	16.118	0.0193877	-0.144223	-0.09	0.11627	STD	0.6132	0.757423	0.794935	-3	3	0.650712	0.650712	1.03528	-0.0214829	0.652183	0.652183	-1.78	-0.152652	-0.152652	line1	-15	15	-1.75554
2021-06-23 04:25:14	ETH-2	476	STD	21	15395.3	15329.2	-119.65	-119.612	76	-10.3725	0.00241357	-10.1011	-18.6487	0.00280704	-7.26511	0.00232231	-5.46775	0.00284513	-11.5096	0.0724693	-0.610785	0.535465	4.84533	19.2624	0.000351147	-13.4401	0.0194281	-0.618024	-0.530978	0.112151	STD	0.2085	non ETH-3	0.78204	-3	3	0.164016	0.164016	1.03528	-0.0214829	0.148319	0.148319	-18.69	-0.04131	-0.04131	line1	-15	15	-18.7923
2021-06-23 05:01:30	ETH-3	476	STD	22	22687.8	23243.7	-160.218	-161.954	95	1.50642	0.00136108	7.03977	-1.65581	0.00241561	4.46104	0.00132579	11.7621	0.00244739	22.3937	0.0473894	-1.23951	0.94085	1.97978	-26.4266	0.00308675	16.0223	0.0176432	-0.193457	-0.09	0.103076	STD	0.6132	0.806657	0.786817	-3	3	0.59336	0.59336	1.03528	-0.0214829	0.592808	0.592808	-1.78	-0.124192	line2	-0.124192	-15	15
2021-06-23 06:44:41	ETH-3	476	STD	25	28062.7	29107	-185.456	-188.74	78	1.49817	0.00260569	6.97748	-1.71756	0.00379238	4.45114	0.00255204	11.6996	0.0038442	22.0177	0.0504712	-1.48333	-8.12948	1.38213	-35.1216	-0.0196702	15.9606	0.0148687	-0.18317	-0.09	0.0766096	STD	0.6132	0.79637	0.801957	-3	3	0.618788	0.618788	1.03528	-0.0214829	0.619133	0.619133	-1.78	-0.0624377	-0.0624377	line1	-15	15	-1.84765
2021-06-23 08:32:55	ETH-3	476	STD	28	22057.3	22436.3	-157.368	-158.212	94	1.51344	0.00177068	7.08917	-1.60684	0.00226524	4.46933	0.00168989	11.8117	0.00229486	22.599	0.0490167	-1.13684	3.07049	2.2537	-24.4579	0.00802271	16.0838	0.0217669	-0.189645	-0.09	0.125994	STD	0.6132	0.802845	0.799608	-3	3	0.609962	0.609962	1.03528	-0.0214829	0.609996	0.609996	-1.78	-0.173165	line2	-0.173165	-15	15
2021-06-23 13:38:22	ETH-3	476	STD	37	14673.1	14530.8	-114.997	-114.243	75	1.5558	0.00171594	7.13733	-1.55909	0.00297303	4.5107	0.00163121	11.8601	0.00301081	22.9301	0.0657111	-0.909105	25.5967	4.10096	-2.68772	0.0582361	16.1175	0.0232657	-0.245941	-0.212844	0.137127	STD	0.6132	0.859141	0.825727	-3	3	0.579786	0.579786	1.03528	-0.0214829	0.578756	0.578756	-1.78	-0.22091	-0.22091	line1	-15	15	-1.66173
2021-06-23 14:46:57	Merck	476	RP	39	17199.1	16798	-130.109	-127.803	83	-42.2331	0.00270076	-6.97816	-15.5527	0.00377157	-37.0093	0.00262427	-2.40036	0.00382257	-5.38761	0.0641936	-0.595849	-28.6723	3.14111	15.9943	-0.065201	-40.7251	0.0204512	-0.286588	-0.237542	0.11662	sample	sample	non ETH-3	0.825727	-3	3	0.539139	sample	1.03528	-0.0214829	0.508631	0.508631	sample	sample	sample	line1	-15	15	-15.6606
2021-06-23 15:22:55	ETH-3	476	STD	40	18937.3	19342.6	-140.179	-141.825	88	1.4996	0.00139681	7.05211	-1.64357	0.00200032	4.45508	0.00133905	11.7745	0.00202648	22.5677	0.0588209	-1.09393	7.73111	3.32424	-19.8395	0.0183465	16.0428	0.0168056	-0.179114	-0.130885	0.0994385	STD	0.6132	0.792314	0.819814	-3	3	0.640701	0.640701	1.03528	-0.0214829	0.641819	0.641819	-1.78	-0.136428	line2	-0.136428	-15	15
2021-06-23 17:10:07	ETH-3	476	STD	43	19482.3	19792.6	-143.161	-144.387	89	1.52242	0.00213009	7.08354	-1.61241	0.00252302	4.47755	0.00203799	11.8061	0.00255655	22.7264	0.0648689	-1.00132	14.4695	2.85264	-13.3696	0.0339346	16.0815	0.0198884	-0.194788	0.172802	0.116727	STD	0.6132	0.807988	0.796688	-3	3	0.6019	0.6019	1.03528	-0.0214829	0.60165	0.60165	-1.78	-0.167588	-0.167588	line1	-15	15	-1.73164
2021-06-23 17:42:48	ETH-1	476	STD	44	15332.5	15593.6	-118.848	-120.529	75	1.83176	0.00130104	6.63283	-2.05924	0.00204004	4.75173	0.00123954	11.3543	0.00206619	21.9291	0.0771156	-0.888138	33.6486	2.91581	5.87353	0.0777995	15.4918	0.0168635	-0.61768	-0.09	0.108718	STD	0.2052	non ETH-3	0.798876	-3	2	0.181196	0.181196	1.03528	-0.0214829	0.166105	0.166105	-2.19	-0.130764	line2	-0.130764	-15	15
2021-06-23 18:17:47	ETH-2	476	STD	45	17984.7	17848	-134.608	-133.583	82	-10.3723	0.00195449	-10.1217	-18.6691	0.0025652	-7.26559	0.00188895	-5.48837	0.00259977	-11.6904	0.0591247	-0.752047	-4.2877	2.99914	14.3913	-0.00948496	-13.4506	0.0190876	-0.607724	#DIV/0!	0.107413	STD	0.2085	non ETH-3	0.798876	-3	1	0.191151	0.191151	1.03528	-0.0214829	0.176412	0.176412	-18.69	-0.0209427	-0.0209427	line1	-15	15	-18.8063
2021-06-23 18:52:38	ETH-3	476	STD	46	16916.3	17165	-128.257	-129.569	79	1.51184	0.00151746	7.04548	-1.65015	0.00171087	4.46631	0.00143402	11.7679	0.0017328	22.7198	0.0634399	-0.932251	27.2354	2.65354	-0.86761	0.0625116	16.0506	0.0221373	-0.176563	#DIV/0!	0.133638	STD	0.6132	0.789763	0.798876	-3	0	0.622313	0.622313	1.03528	-0.0214829	0.622783	0.622783	-1.78	-0.129851	line2	-0.129851	-15	15
2021-06-24 12:07:48	ETH-2	477	STD	2	18691.8	18456.2	-136.117	-134.743	94	-10.3549	0.00190523	-10.1054	-18.6529	0.00276207	-7.2488	0.00184443	-5.47198	0.0027989	-11.5727	0.0500843	-0.666012	-11.5159	3.60149	6.97659	-0.0214049	-13.3898	0.0168365	-0.579779	-0.554137	0.101005	STD	0.2085	non ETH-3	0.767816	-1	3	0.188037	0.188037	1.03528	-0.0214829	0.173187	0.173187	-18.69	-0.0370873	line2	-0.0370873	-15	15
2021-06-24 13:16:20	ETH-3	477	STD	4	17715.6	17695.6	-131.289	-131.379	86	1.57863	0.00163815	7.21581	-1.48128	0.00224576	4.53482	0.00155928	11.939	0.00227476	23.3151	0.075283	-0.688788	32.2663	3.41357	3.61886	0.062027	16.3134	0.0239979	-0.154616	-0.09	0.136934	STD	0.6132	0.767816	0.78771	-3	3	0.633095	0.633095	1.03528	-0.0214829	0.633945	0.633945	-1.78	-0.298717	line2	-0.298717	-15	15
2021-06-24 15:03:13	ETH-3	477	STD	7	16139.8	16123.5	-122.356	-122.046	79	1.52098	0.00231434	6.98256	-1.71252	0.00387518	4.47269	0.00225359	11.7047	0.00392647	22.7945	0.0766322	-0.734667	39.8354	3.35339	11.5042	0.0760768	15.9768	0.0203934	-0.194405	-0.09	0.111531	STD	0.6132	0.807605	0.792633	-3	3	0.598228	0.598228	1.03528	-0.0214829	0.597848	0.597848	-1.78	-0.0674793	-0.0674793	line1	-15	15	-1.8431
2021-06-24 16:43:26	ETH-3	477	STD	10	17367.8	17604.6	-129.662	-130.821	80	1.51234	0.00154516	7.04609	-1.64954	0.00275232	4.4668	0.00149584	11.7685	0.00278819	22.8003	0.0652295	-0.854904	24.7254	2.95369	-3.31081	0.0477329	16.0388	0.0215938	-0.189278	-0.09	0.126359	STD	0.6132	0.802478	0.81556	-3	3	0.626282	0.626282	1.03528	-0.0214829	0.626892	0.626892	-1.78	-0.130461	line2	-0.130461	-15	15
2021-06-24 17:53:51	ETH-1	477	STD	12	17389.2	17338	-130.174	-129.911	78	1.80097	0.00186803	6.57368	-2.11788	0.00213506	4.72082	0.00179375	11.2949	0.00216392	21.9077	0.0636583	-0.791682	27.7112	3.46567	0.243489	0.0520261	15.3737	0.0173733	-0.644455	-0.52243	0.100545	STD	0.2052	non ETH-3	0.819538	-3	3	0.175083	0.175083	1.03528	-0.0214829	0.159777	0.159777	-2.19	-0.072122	line2	-0.072122	-15	15
2021-06-24 18:28:18	ETH-3	477	STD	13	15435.9	15386.2	-118.797	-118.368	77	1.53785	0.0014664	7.12553	-1.57079	0.00236189	4.49347	0.00142756	11.8483	0.0023933	23.0914	0.0669832	-0.728163	36.3698	4.01522	7.82999	0.0671125	16.1107	0.0226699	-0.223397	-0.09	0.138231	STD	0.6132	0.836597	0.823989	-3	3	0.600592	0.600592	1.03528	-0.0214829	0.600295	0.600295	-1.78	-0.209214	-0.209214	line1	-15	15	-1.69396
2021-06-24 20:11:56	ETH-3	477	STD	16	17065.6	16947.8	-128.382	-127.879	81	1.54524	0.00214084	7.20971	-1.48734	0.00286407	4.50332	0.00207181	11.9328	0.00290269	23.1655	0.0520098	-0.822605	38.4973	3.98239	9.72233	0.069995	16.2082	0.021439	-0.219692	-0.09	0.119129	STD	0.6132	0.832892	0.826402	-3	3	0.606709	0.606709	1.03528	-0.0214829	0.606629	0.606629	-1.78	-0.292662	line2	-0.292662	-15	15
2021-06-24 21:49:59	ETH-3	477	STD	19	16842.4	16961.9	-127.539	-127.9	82	1.58013	0.00194344	7.18011	-1.51668	0.00215009	4.53498	0.00184451	11.9031	0.00217812	23.1684	0.0623792	-0.76132	32.1016	2.52881	3.52854	0.0580797	16.2356	0.0221821	-0.196515	-0.09	0.134542	STD	0.6132	0.809715	0.816822	-3	3	0.620307	0.620307	1.03528	-0.0214829	0.620706	0.620706	-1.78	-0.26332	-0.26332	line1	-15	15	-1.68481
2021-06-24 23:01:13	ETH-2	477	STD	21	19505.1	19269.2	-142.634	-140.702	86	-10.3665	0.00152662	-10.0874	-18.6351	0.00349012	-7.25903	0.00152235	-5.45395	0.003536	-11.5522	0.0610282	-0.681568	-19.0219	3.79347	-0.694568	-0.0333991	-13.4451	0.0211386	-0.643029	-0.537751	0.123332	STD	0.2085	non ETH-3	0.808787	-3	3	0.165758	0.165758	1.03528	-0.0214829	0.150123	0.150123	-18.69	-0.0549196	-0.0549196	line1	-15	15	-18.8159
2021-06-24 23:39:12	ETH-3	477	STD	22	15743.3	15558.8	-120.748	-119.803	77	1.53977	0.00175968	7.1688	-1.52789	0.00247582	4.49677	0.00167781	11.8917	0.00250785	23.0112	0.062224	-0.892217	26.7527	2.96165	-1.60976	0.0478466	16.1863	0.0205932	-0.194658	-0.09	0.120846	STD	0.6132	0.807858	0.808787	-3	3	0.614128	0.614128	1.03528	-0.0214829	0.61431	0.61431	-1.78	-0.252106	line2	-0.252106	-15	15
2021-06-25 02:18:24	IAEA-C2	477	TA	27	14802.6	14693.2	-115.452	-114.488	74	-8.33329	0.0020096	-0.161803	-8.7952	0.00193289	-5.0089	0.00190164	4.51293	0.00195809	8.3275	0.0617517	-0.71234	7.58291	3.9571	4.06626	0.0130522	-0.89428	0.0249871	-0.140656	-0.0787195	0.155216	sample	sample	non ETH-3	0.793354	-3	3	0.652698	sample	1.03528	-0.0214829	0.661901	0.661901	sample	sample	sample	line1	-15	15	-9.00406
2021-06-25 02:53:16	ETH-3	477	STD	28	15725.3	15592.9	-120.741	-120.18	76	1.51527	0.00223049	7.14091	-1.55554	0.00277965	4.47284	0.00213584	11.8637	0.00281645	23.0627	0.0656112	-0.786535	36.858	4.19659	8.29655	0.0649273	16.1483	0.017922	-0.180154	-0.105556	0.10452	STD	0.6132	0.793354	0.795897	-3	3	0.615743	0.615743	1.03528	-0.0214829	0.615981	0.615981	-1.78	-0.224458	line2	-0.224458	-15	15
2021-06-25 04:38:29	ETH-3	477	STD	31	15900.6	15705.1	-121.849	-120.809	77	1.52258	0.00250302	7.16235	-1.53429	0.00335849	4.48044	0.00242733	11.8852	0.00340398	23.0509	0.0699007	-0.840611	35.8229	5.01375	7.23908	0.0638523	16.1724	0.0200422	-0.185239	-0.103906	0.111972	STD	0.6132	0.798439	0.798438	-3	3	0.613199	0.613199	1.03528	-0.0214829	0.613347	0.613347	-1.78	-0.245709	-0.245709	line1	-15	15	-1.68668
2021-06-25 06:21:31	ETH-3	477	STD	34	18124.3	18415.9	-135.479	-136.72	85	1.51933	0.00159308	7.12433	-1.57198	0.00222813	4.47608	0.00150806	11.847	0.00225649	22.9158	0.0439917	-0.897176	21.4026	2.75702	-6.70398	0.0390367	16.125	0.0204227	-0.19032	-0.105101	0.127114	STD	0.6132	0.80352	0.806415	-3	3	0.616095	0.616095	1.03528	-0.0214829	0.616346	0.616346	-1.78	-0.20802	line2	-0.20802	-15	15
2021-06-25 07:34:36	Merck	477	TA	36	20222.7	19527.6	-146.563	-142.655	91	-42.2207	0.0025151	-6.92287	-15.4979	0.00394276	-36.9957	0.00246824	-2.34484	0.00399616	-5.28277	0.0576991	-0.601737	-34.12	4.38565	10.1698	-0.0598641	-40.6516	0.0175735	-0.279206	-0.580225	0.0983834	sample	sample	non ETH-3	0.802561	-3	3	0.523356	sample	1.03528	-0.0214829	0.516385	0.516385	sample	sample	line2	sample	-15	15
2021-06-25 08:08:55	ETH-3	477	STD	37	17496	17536.6	-131.734	-131.758	83	1.548	0.00134209	7.16103	-1.5356	0.00235702	4.50421	0.00127505	11.8839	0.00238693	23.0079	0.0643577	-0.880102	21.1961	3.48329	-7.00574	0.0381612	16.1768	0.0207121	-0.204086	-0.894768	0.124592	STD	0.6132	0.817286	0.802561	-3	3	0.598475	0.598475	1.03528	-0.0214829	0.598104	0.598104	-1.78	-0.244404	-0.244404	line1	-15	15	-1.67411
2021-06-25 09:35:54	ETH-3	477	STD	40	16552.1	16632.1	-126.294	-126.139	79	1.4655	0.00197615	6.89668	-1.79766	0.00436356	4.41773	0.00197586	11.6184	0.0044213	22.6762	0.0512777	-0.679694	13.7056	2.74966	-13.6908	0.0245851	15.8553	0.0188248	-0.173678	-0.679286	0.0962012	STD	0.6132	0.786878	0.801212	-3	3	0.627535	0.627535	1.03528	-0.0214829	0.628189	0.628189	-1.78	0.0176629	line2	0.0176629	-15	15
2021-06-25 11:21:38	ETH-3	477	STD	43	19386.8	19546.4	-142.229	-142.75	88	1.52132	0.00154937	7.15216	-1.54439	0.00211385	4.47891	0.00148531	11.875	0.00214163	23.0143	0.0609572	-0.856094	14.2161	2.88132	-13.7493	0.0267402	16.1596	0.0150684	-0.186274	0.0151957	0.0897709	STD	0.6132	0.799474	0.787583	-3	3	0.601309	0.601309	1.03528	-0.0214829	0.601038	0.601038	-1.78	-0.235608	-0.235608	line1	-15	15	-1.69494
2021-06-25 11:56:08	ETH-1	477	STD	44	19848.7	20241.5	-144.92	-146.109	86	1.82004	0.00201732	6.59587	-2.09588	0.00247894	4.73946	0.00194481	11.3172	0.00251247	21.75	0.0677491	-0.989928	13.755	2.22828	-13.4018	0.0259608	15.5152	0.0196159	-0.546039	-0.212228	0.114209	STD	0.2052	non ETH-3	0.787936	-3	2	0.241897	0.241897	1.03528	-0.0214829	0.228947	0.228947	-2.19	-0.0941249	line2	-0.0941249	-15	15
2021-06-25 12:30:56	ETH-2	477	STD	45	19467.9	19686.6	-142.522	-143.653	87	-10.3632	0.00210453	-10.0936	-18.6412	0.00271349	-7.25609	0.00204477	-5.46015	0.00275068	-11.6727	0.0595104	-0.790833	-15.6609	2.90853	2.73861	-0.027652	-13.3624	0.0201164	-0.556153	-0.09	0.116195	STD	0.2085	non ETH-3	0.787936	-3	1	0.231782	0.231782	1.03528	-0.0214829	0.218476	0.218476	-18.69	-0.0487878	-0.0487878	line1	-15	15	-18.7918
2021-06-25 13:05:26	ETH-3	477	STD	46	16656.7	16907.9	-126.56	-127.835	80	1.50055	0.00172409	7.03696	-1.65859	0.00309458	4.45544	0.00165104	11.7593	0.00313426	22.846	0.0601825	-0.792102	30.4176	3.30411	2.25533	0.0547828	16.0444	0.0211762	-0.163198	#DIV/0!	0.124954	STD	0.6132	0.776398	0.787936	-3	0	0.624738	0.624738	1.03528	-0.0214829	0.625293	0.625293	-1.78	-0.121409	line2	-0.121409	-15	15
2021-06-25 15:24:39	ETH-3	478	STD	1	20041.5	20331	-144.887	-147.775	95	1.46771	0.00306937	6.88824	-1.80603	0.0055859	4.4195	0.00305334	11.6099	0.00566139	22.8112	0.0639976	-0.531045	38.0513	4.90907	10.0101	0.0863447	15.938	0.0263606	-0.0859034	-0.09	0.133197	STD	0.6132	0.699103	0.699103	0	3	0.6132	0.6132	1.03528	-0.0214829	0.613348	0.613348	-1.78	0.0260257	0.0260257	line1	-15	15	-1.95658
2021-06-25 15:59:20	ETH-2	478	STD	2	17945.7	18089.9	-134.33	-134.909	87	-10.3883	0.00183117	-10.1451	-18.6922	0.00251094	-7.28146	0.00176544	-5.51187	0.00254437	-11.6253	0.0527084	-0.638984	-11.2697	3.20543	7.34219	-0.0241033	-13.4196	0.0176103	-0.536654	-0.79213	0.102777	STD	0.2085	non ETH-3	0.699103	-1	3	0.162449	0.162449	1.03528	-0.0214829	0.146697	0.146697	-18.69	0.00224098	line2	0.00224098	-15	15
2021-06-25 16:33:22	ETH-1	478	STD	3	17288.7	17251	-130.78	-129.94	94	1.84186	0.00209999	6.66856	-2.02381	0.00296812	4.76244	0.00203487	11.3902	0.00300793	22.0958	0.0571384	-0.796113	27.7386	2.61013	0.0409096	0.0611528	15.5728	0.0184232	-0.583888	-1.09074	0.0976717	STD	0.2052	non ETH-3	0.699103	-2	3	0.115216	0.115216	1.03528	-0.0214829	0.0977973	0.0977973	-2.19	-0.166186	-0.166186	line1	-15	15	-2.15798
2021-06-25 19:57:22	IAEA-C2	478	NW	9	20846.9	21007.7	-149.652	-150.162	96	-8.45432	0.00161987	-0.172246	-8.80555	0.00302292	-5.12266	0.00158939	4.5022	0.00306286	8.1996	0.0497135	-0.817733	6.22636	2.04762	2.8579	0.0149822	-1.03019	0.0191157	-0.148196	-31.3651	0.101997	sample	sample	non ETH-3	0.84179	-3	3	0.693594	sample	1.03528	-0.0214829	0.696578	0.696578	sample	sample	sample	line1	-15	15	-8.91246
2021-06-25 20:31:41	ETH-3	478	STD	10	19644.6	20066.5	-143.274	-145.391	92	1.50468	0.00125966	7.04219	-1.65341	0.00214279	4.45949	0.00118022	11.7645	0.00216943	22.7581	0.0476299	-0.888316	22.4586	1.90376	-5.50005	0.0510373	16.0283	0.0191453	-0.188276	-0.09	0.118405	STD	0.6132	0.801476	0.84179	-3	3	0.653514	0.653514	1.03528	-0.0214829	0.655085	0.655085	-1.78	-0.126591	line2	-0.126591	-15	15
2021-06-25 22:04:38	ETH-3	478	STD	13	16321.5	16409.9	-124.256	-124.799	82	1.50727	0.00155869	7.05491	-1.6408	0.00193827	4.46236	0.00149347	11.7773	0.00196398	22.8622	0.0561512	-0.811836	24.5938	2.78367	-3.4511	0.053707	15.962	0.0194345	-0.268904	-0.0622234	0.119135	STD	0.6132	0.882104	0.838258	-3	3	0.569354	0.569354	1.03528	-0.0214829	0.567956	0.567956	-1.78	-0.139199	-0.139199	line1	-15	15	-1.74771
2021-06-25 22:39:08	Merck	478	NW	14	16633.4	15890	-126.299	-121.892	89	-42.4237	0.00267973	-7.46941	-16.0397	0.00415233	-37.205	0.00263687	-2.89385	0.00420897	-6.62558	0.0623518	-0.851516	-20.3936	4.27992	25.8719	-0.0448777	-41.4369	0.0195572	-0.332816	-0.09	0.106039	sample	sample	non ETH-3	0.838258	-3	3	0.505442	sample	1.03528	-0.0214829	0.501789	0.501789	sample	sample	line2	sample	-15	15
2021-06-25 23:52:53	ETH-3	478	STD	16	19556.8	19715.9	-143.267	-143.36	91	1.5228	0.00181314	7.05389	-1.64181	0.00273668	4.47688	0.0017477	11.7763	0.00277268	22.7841	0.050537	-0.886231	27.6345	3.37132	-0.507692	0.0627304	16.0279	0.0189714	-0.217995	-0.0645589	0.106642	STD	0.6132	0.831195	0.834977	-3	3	0.616982	0.616982	1.03528	-0.0214829	0.617264	0.617264	-1.78	-0.138192	line2	-0.138192	-15	15
2021-06-26 01:35:13	ETH-3	478	STD	19	20393.6	20880.9	-147.099	-149.816	92	1.51415	0.00135252	7.04662	-1.64902	0.0023692	4.46852	0.00129672	11.769	0.00239968	22.6099	0.0589436	-1.04196	17.4109	2.49307	-10.428	0.040052	16.0521	0.0135057	-0.178433	-0.0927402	0.0845228	STD	0.6132	0.791633	0.807295	-3	3	0.628863	0.628863	1.03528	-0.0214829	0.629564	0.629564	-1.78	-0.130985	-0.130985	line1	-15	15	-1.77829
2021-06-26 02:47:24	ETH-2	478	STD	21	15896.5	15795.5	-121.931	-121.58	88	-10.3802	0.00191123	-10.1257	-18.6731	0.00309742	-7.27321	0.00186216	-5.49247	0.00313863	-11.6125	0.0540906	-0.665045	6.44959	3.96158	25.3463	0.0141918	-13.4812	0.0206053	-0.626766	-0.552839	0.123158	STD	0.2085	non ETH-3	0.795346	-3	3	0.16858	0.16858	1.03528	-0.0214829	0.153043	0.153043	-18.69	-0.0169041	-0.0169041	line1	-15	15	-18.795
2021-06-26 03:21:58	ETH-3	478	STD	22	15686.3	15772.9	-120.539	-121.112	78	1.46969	0.0016218	6.99128	-1.70388	0.00210887	4.42493	0.00154771	11.7134	0.0021364	22.6001	0.0655417	-0.941599	33.7164	3.73302	5.58641	0.0738496	15.9442	0.0162834	-0.185858	-0.11217	0.093511	STD	0.6132	0.799058	0.784449	-3	3	0.59859	0.59859	1.03528	-0.0214829	0.598224	0.598224	-1.78	-0.0761209	line2	-0.0761209	-15	15
2021-06-26 05:03:14	ETH-3	478	STD	25	20300.2	20732.2	-146.96	-149.1	91	1.48193	0.00162826	7.0594	-1.63635	0.00196857	4.43878	0.00153405	11.7818	0.00199346	22.7955	0.0606258	-0.885809	14.8701	2.27148	-12.8925	0.0342297	16.0631	0.0189476	-0.149455	-0.0985338	0.110971	STD	0.6132	0.762655	0.801866	-3	3	0.65241	0.65241	1.03528	-0.0214829	0.653942	0.653942	-1.78	-0.143649	-0.143649	line1	-15	15	-1.77315
2021-06-26 06:51:32	ETH-3	478	STD	28	17793.1	17776.6	-133.285	-133.025	85	1.53536	0.00164088	7.13366	-1.56272	0.00194597	4.49142	0.00155525	11.8564	0.00197107	22.8516	0.0583936	-0.978402	22.0899	2.40317	-6.06986	0.0487902	16.1092	0.0167743	-0.230683	-0.185431	0.100225	STD	0.6132	0.843883	0.802641	-3	3	0.571958	0.571958	1.03528	-0.0214829	0.570652	0.570652	-1.78	-0.217276	line2	-0.217276	-15	15
2021-06-26 08:37:37	ETH-3	478	STD	31	17334.9	17203.4	-130.737	-129.506	83	1.54632	0.00208602	7.09479	-1.60127	0.00239515	4.50034	0.00200148	11.8174	0.00242742	22.9172	0.0772945	-0.837333	23.0595	3.49384	-5.06145	0.0510942	16.1232	0.0202132	-0.188185	-0.135001	0.120462	STD	0.6132	0.801385	0.817291	-3	3	0.629107	0.629107	1.03528	-0.0214829	0.629816	0.629816	-1.78	-0.178735	-0.178735	line1	-15	15	-1.71038
2021-06-26 10:22:32	ETH-3	478	STD	34	20026.6	20491	-145.624	-147.602	90	1.50629	0.00172765	7.05076	-1.64491	0.00242721	4.4613	0.00166657	11.7731	0.00245946	22.8197	0.0600109	-0.845171	14.0052	2.21435	-13.7409	0.0320209	16.0335	0.013376	-0.193406	-0.142016	0.0794954	STD	0.6132	0.806606	0.804152	-3	3	0.610747	0.610747	1.03528	-0.0214829	0.610809	0.610809	-1.78	-0.135088	line2	-0.135088	-15	15
2021-06-26 12:10:33	ETH-3	478	STD	37	15174.4	15211.9	-117.989	-117.689	78	1.54154	0.00184679	7.12765	-1.56868	0.00212052	4.497	0.00173103	11.8504	0.00214692	22.8515	0.0619359	-0.966659	27.1698	4.06902	-1.12417	0.0594894	16.1492	0.0187468	-0.191267	-0.11612	0.113617	STD	0.6132	0.804467	0.793276	-3	3	0.602009	0.602009	1.03528	-0.0214829	0.601762	0.601762	-1.78	-0.211316	-0.211316	line1	-15	15	-1.69094
2021-06-26 13:50:46	ETH-3	478	STD	40	17354.8	17581	-130.545	-131.757	83	1.52125	0.00141598	7.10388	-1.59226	0.00226962	4.47716	0.00135172	11.8265	0.00229878	22.9948	0.0771538	-0.779492	25.7471	2.27375	-2.44026	0.0576499	16.1412	0.0153983	-0.155555	-0.0947569	0.0927575	STD	0.6132	0.768755	0.787071	-3	3	0.631516	0.631516	1.03528	-0.0214829	0.632311	0.632311	-1.78	-0.187744	line2	-0.187744	-15	15
2021-06-26 15:25:44	ETH-3	478	STD	43	16648.1	16877.3	-126.417	-127.879	94	1.48341	0.00320718	6.9213	-1.77326	0.00462688	4.43536	0.00314537	11.6432	0.00469039	22.6052	0.0579869	-0.797963	29.5762	3.69601	1.68346	0.0660428	15.897	0.0168207	-0.174791	0.121946	0.0860925	STD	0.6132	0.787991	0.785739	-3	3	0.610948	0.610948	1.03528	-0.0214829	0.611017	0.611017	-1.78	-0.00674467	-0.00674467	line1	-15	15	-1.89195
2021-06-26 16:00:44	ETH-1	478	STD	44	22750.9	23304.2	-159.67	-161.275	98	1.8285	0.00187639	6.58375	-2.10789	0.00252664	4.74697	0.00180408	11.3051	0.00256013	21.4013	0.0472707	-1.30689	-0.696035	2.11742	-27.4504	-0.000679027	15.4926	0.0165582	-0.564117	-0.142582	0.0921862	STD	0.2052	non ETH-3	0.785739	-3	2	0.221621	0.221621	1.03528	-0.0214829	0.207956	0.207956	-2.19	-0.0821086	line2	-0.0821086	-15	15
2021-06-26 16:35:05	ETH-2	478	STD	45	15621.4	15455.9	-120.083	-119.262	80	-10.3701	0.00175808	-10.0838	-18.6315	0.00282726	-7.26223	0.00169845	-5.45032	0.00286435	-11.6176	0.0703815	-0.754948	-13.8002	3.29523	4.62118	-0.0313146	-13.4383	0.0193931	-0.636334	-0.09	0.117932	STD	0.2085	non ETH-3	0.794231	-3	1	0.157896	0.157896	1.03528	-0.0214829	0.141983	0.141983	-18.69	-0.0585123	-0.0585123	line1	-15	15	-18.7502
2021-06-26 17:12:01	ETH-3	478	STD	46	20786.7	21660	-149.604	-152.944	92	1.46523	0.00151661	6.92543	-1.76916	0.00230268	4.41847	0.00144838	11.6473	0.0023324	22.2654	0.0623085	-1.13805	7.74502	1.89843	-19.5455	0.0185907	15.8707	0.0144713	-0.187271	#DIV/0!	0.0822264	STD	0.6132	0.800471	0.794231	-3	0	0.60696	0.60696	1.03528	-0.0214829	0.606888	0.606888	-1.78	-0.0108377	line2	-0.0108377	-15	15
2021-06-28 11:07:15	ETH-3	479	STD	1	16194.8	16289.5	-119.289	-119.68	83	1.53003	0.00173803	7.04169	-1.65391	0.00175479	4.48323	0.00163613	11.7641	0.00177706	22.5018	0.0678517	-1.13777	51.5465	4.00826	22.7674	0.0962591	16.1701	0.0198062	-0.0726786	-0.09	0.116298	STD	0.6132	0.685879	0.747145	0	3	0.674467	0.674467	1.03528	-0.0214829	0.676776	0.676776	-1.78	-0.126093	-0.126093	line1	-15	15	-1.7726
2021-06-28 11:40:08	ETH-2	479	STD	2	22150.3	22288.5	-151.517	-152.323	94	-10.3859	0.00136654	-10.1166	-18.664	0.00206338	-7.27815	0.00131503	-5.48329	0.00209043	-11.4718	0.0469662	-0.541284	-17.7759	2.03071	0.653733	-0.0330318	-13.3412	0.012224	-0.488941	-0.465418	0.0779762	STD	0.2085	non ETH-3	0.747145	-1	3	0.258205	0.258205	1.03528	-0.0214829	0.24583	0.24583	-18.69	-0.0259804	line2	-0.0259804	-15	15
2021-06-28 12:14:39	ETH-1	479	STD	3	18589.8	18949.7	-133.55	-135.675	84	1.85074	0.0011676	6.6328	-2.05926	0.00158574	4.76951	0.00109497	11.3544	0.00160549	22.0334	0.0580166	-0.786248	25.9495	1.99709	-1.63752	0.0481373	15.6198	0.0193501	-0.510037	-0.44567	0.121767	STD	0.2052	non ETH-3	0.747145	-2	3	0.237108	0.237108	1.03528	-0.0214829	0.223989	0.223989	-2.19	-0.130738	-0.130738	line1	-15	15	-2.16594
2021-06-28 12:49:23	ETH-3	479	STD	4	13536.8	13546.6	-104.121	-104.251	74	1.50987	0.00149164	7.05467	-1.64103	0.00247009	4.46479	0.00142898	11.7771	0.00250195	22.9564	0.0602015	-0.719389	34.5724	3.49656	6.25214	0.0638553	16.0392	0.0193776	-0.195212	-0.09	0.117477	STD	0.6132	0.808412	0.747145	-3	3	0.551933	0.551933	1.03528	-0.0214829	0.54992	0.54992	-1.78	-0.138968	line2	-0.138968	-15	15
2021-06-28 16:14:38	ETH-3	479	STD	10	18340.9	18692.9	-132.917	-134.974	84	1.57926	0.00154766	7.15629	-1.54029	0.0024871	4.53334	0.00149168	11.8792	0.0025196	23.2727	0.0551539	-0.612181	30.3175	2.81244	1.84195	0.05592	16.1727	0.0177895	-0.233416	-0.09	0.106445	STD	0.6132	0.846616	0.846616	-3	3	0.6132	0.6132	1.03528	-0.0214829	0.613348	0.613348	-1.78	-0.23971	line2	-0.23971	-15	15
2021-06-28 17:30:14	ETH-1	479	STD	12	19020.9	19290.5	-137.291	-138.429	85	1.85318	0.00137826	6.63044	-2.0616	0.00202798	4.77171	0.00132421	11.352	0.00205456	21.9229	0.0486377	-0.889593	22.0171	2.80155	-5.4621	0.0406486	15.5393	0.0185269	-0.589169	-0.471304	0.114257	STD	0.2052	non ETH-3	0.846616	-3	3	0.257447	0.257447	1.03528	-0.0214829	0.245046	0.245046	-2.19	-0.128398	line2	-0.128398	-15	15
2021-06-28 19:53:56	ETH-3	479	STD	16	16508.6	16611.7	-123.383	-123.858	79	1.54241	0.00217474	7.12023	-1.57605	0.0020425	4.49756	0.00207095	11.8429	0.00207004	22.9518	0.06831	-0.85394	36.1623	4.17802	7.63439	0.0641379	16.1149	0.0192184	-0.218348	-0.09	0.113168	STD	0.6132	0.831548	0.813047	-3	3	0.594699	0.594699	1.03528	-0.0214829	0.594195	0.594195	-1.78	-0.203953	line2	-0.203953	-15	15
2021-06-28 21:04:17	IAEA-C2	479	RP	18	15285.2	15345.6	-116.325	-116.709	80	-8.37614	0.00197893	-0.364075	-8.99572	0.00411103	-5.05609	0.00193822	4.30982	0.00416463	7.91251	0.0703463	-0.71953	15.5128	4.10619	12.4215	0.0269987	-1.12269	0.0226329	-0.121563	-0.0178831	0.130763	sample	sample	non ETH-3	0.813047	-3	3	0.691484	sample	1.03528	-0.0214829	0.681954	0.681954	sample	sample	line2	sample	-15	15
2021-06-28 21:40:13	ETH-3	479	STD	19	16719.8	16775.1	-124.998	-125.359	79	1.49968	0.00138836	7.18925	-1.50762	0.00278853	4.45991	0.00135278	11.9121	0.00282479	23.1031	0.0549787	-0.842831	27.5682	3.20957	-0.817393	0.0482153	16.1815	0.020553	-0.181347	-0.09	0.121282	STD	0.6132	0.794547	0.816011	-3	3	0.634664	0.634664	1.03528	-0.0214829	0.63557	0.63557	-1.78	-0.272378	-0.272378	line1	-15	15	-1.51164
2021-06-28 22:53:39	ETH-2	479	STD	21	19567.3	19409.8	-141.572	-140.185	86	-10.4866	0.00326343	-10.5201	-19.0641	0.00614684	-7.38658	0.00325134	-5.88854	0.00622963	-12.4369	0.0657574	-0.70285	-12.312	3.71721	7.14205	-0.02051	-13.9409	0.0226472	-0.58349	-0.473882	0.119613	STD	0.2085	non ETH-3	0.808243	-3	3	0.224752	0.224752	1.03528	-0.0214829	0.211198	0.211198	-18.69	0.374067	0.374067	line1	-15	15	-19.1204
2021-06-28 23:29:00	ETH-3	479	STD	22	20489	20746.8	-146.344	-146.975	93	1.54225	0.00142564	7.07463	-1.62125	0.00159744	4.49582	0.00135085	11.7972	0.00161811	22.9023	0.0547865	-0.811922	15.904	2.30508	-11.9763	0.029005	16.0776	0.0195434	-0.208739	-0.09	0.117528	STD	0.6132	0.821939	0.815985	-3	3	0.607247	0.607247	1.03528	-0.0214829	0.607185	0.607185	-1.78	-0.158753	line2	-0.158753	-15	15
2021-06-29 01:13:59	ETH-3	479	STD	25	13775	14005.2	-107.544	-108.927	83	1.50597	0.00127903	7.02922	-1.66627	0.00209404	4.46025	0.00119805	11.7515	0.00212006	22.9011	0.0782819	-0.722908	42.0573	4.91128	13.5875	0.073479	15.9858	0.0233105	-0.218271	-0.09	0.143494	STD	0.6132	0.831471	0.838533	-3	3	0.620262	0.620262	1.03528	-0.0214829	0.620659	0.620659	-1.78	-0.113734	-0.113734	line1	-15	15	-1.72259
2021-06-29 03:00:50	ETH-3	479	STD	28	14436.7	14598.4	-111.777	-112.631	75	1.40911	0.0014721	7.09594	-1.60012	0.00195771	4.37181	0.00137795	11.8183	0.00198198	22.8938	0.0574017	-0.861948	31.4916	3.78485	3.27448	0.0550242	15.9282	0.0200578	-0.248988	-0.09	0.125603	STD	0.6132	0.862188	0.846829	-3	3	0.597841	0.597841	1.03528	-0.0214829	0.597448	0.597448	-1.78	-0.179879	line2	-0.179879	-15	15
2021-06-29 06:16:20	ETH-3	479	STD	34	20206.5	20868.6	-145.334	-148.25	91	1.55367	0.0017158	7.1194	-1.57686	0.00284427	4.50808	0.00166007	11.8421	0.00288156	22.9265	0.0453687	-0.877094	21.2997	3.10959	-6.82868	0.0391181	16.1569	0.0163645	-0.187062	-0.103277	0.0974913	STD	0.6132	0.800262	0.822644	-3	3	0.635582	0.635582	1.03528	-0.0214829	0.63652	0.63652	-1.78	-0.203135	line2	-0.203135	-15	15
2021-06-29 07:47:53	ETH-3	479	STD	37	15191.6	15302.4	-116.849	-117.148	75	1.55564	0.00153389	7.12961	-1.56674	0.0017799	4.51028	0.00143157	11.8524	0.00180174	22.9654	0.0694858	-0.859316	38.8373	3.58821	10.2038	0.067223	16.1238	0.0166433	-0.231826	-0.0491975	0.100659	STD	0.6132	0.845026	0.822644	-3	3	0.590818	0.590818	1.03528	-0.0214829	0.590177	0.590177	-1.78	-0.213259	-0.213259	line1	-15	15	-1.61693
2021-06-29 08:56:18	Merck	479	RP	39	12770.6	12103.1	-101.134	-97.065	86	-42.2241	0.00261106	-6.95764	-15.5324	0.00371301	-37.0001	0.00253966	-2.37975	0.00376319	-5.57209	0.088209	-0.822517	-46.3195	4.6551	-2.51586	-0.0874447	-40.7863	0.0230947	-0.380559	-0.09	0.137829	sample	sample	non ETH-3	0.845026	-3	3	0.464466	sample	1.03528	-0.0214829	0.409934	0.409934	sample	sample	sample	line1	-15	15	-15.6674
2021-06-29 11:41:00	ETH-1	479	STD	44	17214.2	17369.4	-128.526	-129.447	80	1.83829	0.00250003	6.59685	-2.0949	0.00320894	4.7566	0.00240869	11.3182	0.00325199	21.9618	0.0588335	-0.784913	41.6487	5.65603	13.7232	0.0739363	15.544	0.0232717	-0.536249	-1273.98	0.129272	STD	0.2052	non ETH-3	0.77396	-3	2	0.237711	0.237711	1.03528	-0.0214829	0.224614	0.224614	-2.19	-0.0950974	line2	-0.0950974	-15	15
2021-06-29 12:15:01	ETH-2	479	STD	45	16182.4	16166.5	-122.388	-122.319	81	-10.3718	0.00201957	-10.1146	-18.6621	0.002503	-7.26492	0.0019232	-5.4813	0.00253564	-11.713	0.0717059	-0.789123	-8.09592	3.92046	10.497	-0.0143552	-13.4077	0.0152292	-0.571942	-637.258	0.0905899	STD	0.2085	non ETH-3	0.77396	-3	1	0.202018	0.202018	1.03528	-0.0214829	0.187662	0.187662	-18.69	-0.0279202	-0.0279202	line1	-15	15	-18.7994
2021-06-29 12:51:48	ETH-3	479	STD	46	14753.2	14930.9	-113.842	-114.817	74	1.54499	0.00206089	7.17676	-1.52	0.00269865	4.50194	0.00195283	11.8997	0.00273321	23.2407	0.0556394	-0.683867	35.1261	4.83395	6.51096	0.0616791	16.234	0.020655	-0.16076	-0.09	0.117545	STD	0.6132	0.77396	0.77396	-3	0	0.6132	0.6132	1.03528	-0.0214829	0.613348	0.613348	-1.78	-0.260002	line2	-0.260002	-15	15
2021-06-29 15:35:52	ETH-2	480	STD	2	17481.7	17501.5	-129.662	-130.086	91	-10.383	0.0021249	-10.1363	-18.6836	0.00302802	-7.27619	0.00207265	-5.50311	0.00306918	-11.7926	0.0610648	-0.8258	-11.1643	3.8675	7.42619	-0.0238462	-13.443	0.0169868	-0.574498	-0.526956	0.0938544	STD	0.2085	non ETH-3	0.819027	-1	3	0.244529	0.244529	1.03528	-0.0214829	0.231672	0.231672	-18.69	-0.00640595	line2	-0.00640595	-15	15
2021-06-29 16:11:23	ETH-1	480	STD	3	16787.6	17116.6	-126.295	-127.662	82	1.83251	0.00144407	6.58091	-2.11071	0.00178128	4.75063	0.00137141	11.3022	0.00180432	21.7088	0.0547023	-1.00059	15.8623	3.06709	-11.3337	0.0350783	15.4345	0.0169194	-0.622319	-0.540634	0.102412	STD	0.2052	non ETH-3	0.819027	-2	3	0.196708	0.196708	1.03528	-0.0214829	0.182165	0.182165	-2.19	-0.0792927	-0.0792927	line1	-15	15	-2.24806
2021-06-29 16:46:23	ETH-3	480	STD	4	23252.4	24284.4	-161.01	-164.599	102	1.50208	0.00193303	7.03012	-1.66538	0.0026245	4.45664	0.00186451	11.7524	0.00265953	22.4434	0.0511539	-1.17176	0.0693082	1.59766	-27.2515	0.000853991	15.9955	0.0206712	-0.205827	-0.09	0.118779	STD	0.6132	0.819027	0.770376	-3	3	0.564549	0.564549	1.03528	-0.0214829	0.562981	0.562981	-1.78	-0.114622	line2	-0.114622	-15	15
2021-06-29 18:33:29	ETH-3	480	STD	7	14395.7	14455.5	-111.608	-111.566	78	1.52927	0.00147405	7.1576	-1.53899	0.00161439	4.48654	0.00138071	11.8804	0.00163444	23.024	0.0697901	-0.857467	23.8378	3.36689	-4.41124	0.0511497	16.252	0.019663	-0.108525	-0.09	0.12082	STD	0.6132	0.721725	0.806747	-3	3	0.698222	0.698222	1.03528	-0.0214829	0.701369	0.701369	-1.78	-0.241005	-0.241005	line1	-15	15	-1.67535
2021-06-29 20:19:33	ETH-3	480	STD	10	24379.2	25618.9	-166.595	-170.817	100	1.5213	0.00196859	7.0299	-1.6656	0.00222276	4.47464	0.00189983	11.7522	0.00225339	22.2434	0.0464497	-1.36686	-8.44802	1.68901	-35.5542	-0.0185335	15.9527	0.016912	-0.266287	-0.09	0.0991003	STD	0.6132	0.879487	0.827382	-3	3	0.561095	0.561095	1.03528	-0.0214829	0.559405	0.559405	-1.78	-0.114405	line2	-0.114405	-15	15
2021-06-29 21:29:01	ETH-1	480	STD	12	25023.1	25839.5	-168.964	-172.54	102	1.80517	0.00220696	6.50182	-2.18912	0.00389681	4.72226	0.00216957	11.2228	0.0039488	21.2346	0.0426979	-1.3074	0.366446	1.79719	-26.2354	0.0020511	15.3239	0.0168899	-0.624842	-0.447591	0.0946483	STD	0.2052	non ETH-3	0.88021	-3	3	0.255368	0.255368	1.03528	-0.0214829	0.242894	0.242894	-2.19	-0.000884091	line2	-0.000884091	-15	15
2021-06-29 22:05:08	ETH-3	480	STD	13	18293.4	18793.7	-135.105	-137.306	93	1.48383	0.00151184	7.04088	-1.65471	0.00171615	4.43991	0.00142586	11.7632	0.00173798	22.5738	0.0441645	-1.0657	11.8282	1.77043	-15.8167	0.0255899	15.9258	0.020601	-0.267734	-0.09	0.123697	STD	0.6132	0.880934	0.86563	-3	3	0.597896	0.597896	1.03528	-0.0214829	0.597505	0.597505	-1.78	-0.12529	-0.12529	line1	-15	15	-1.78857
2021-06-29 23:52:08	ETH-3	480	STD	16	18615.5	18929	-135.993	-138.066	101	1.5345	0.00161217	7.11473	-1.5815	0.0022279	4.48996	0.00154791	11.8374	0.00225725	22.8572	0.0643198	-0.935433	19.2113	3.91506	-8.83139	0.0417683	16.0965	0.018907	-0.223268	-0.09	0.114139	STD	0.6132	0.836468	0.841534	-3	3	0.618265	0.618265	1.03528	-0.0214829	0.618593	0.618593	-1.78	-0.198501	line2	-0.198501	-15	15
2021-06-30 01:01:37	IAEA-C2	480	NdW	18	15574.4	15546.8	-119.042	-118.781	77	-8.34788	0.00167723	-0.230911	-8.86371	0.00206741	-5.02498	0.00158918	4.44354	0.00209398	8.07955	0.0649406	-0.820006	9.72103	3.37083	6.35101	0.02034	-1.02828	0.0227817	-0.190185	-0.0764291	0.13602	sample	sample	non ETH-3	0.821834	-3	3	0.631649	sample	1.03528	-0.0214829	0.609882	0.609882	sample	sample	line2	sample	-15	15
2021-06-30 01:35:57	ETH-3	480	STD	19	14396.6	14635.6	-111.913	-113.297	89	1.48083	0.00145441	7.15812	-1.53848	0.00236887	4.44118	0.00134218	11.8809	0.00239757	23.24	0.064398	-0.647348	29.6198	3.48644	1.25852	0.0621606	16.1182	0.0159939	-0.194	-0.09	0.101423	STD	0.6132	0.8072	0.831066	-3	3	0.637067	0.637067	1.03528	-0.0214829	0.638057	0.638057	-1.78	-0.241522	-0.241522	line1	-15	15	-1.69745
2021-06-30 02:47:44	ETH-2	480	STD	21	19198	19114.5	-140.304	-139.633	92	-10.3822	0.00203	-10.1164	-18.6638	0.00260685	-7.2747	0.00195339	-5.48307	0.00264169	-11.7422	0.0640784	-0.815145	-14.3043	3.55309	4.18595	-0.0292529	-13.4131	0.0175391	-0.56551	-0.433289	0.10464	STD	0.2085	non ETH-3	0.828366	-3	3	0.262856	0.262856	1.03528	-0.0214829	0.250645	0.250645	-18.69	-0.0261942	-0.0261942	line1	-15	15	-18.8228
2021-06-30 03:21:12	ETH-3	480	STD	22	14046.5	13937.1	-109.888	-109.005	88	1.53882	0.00134874	7.15197	-1.54458	0.00209834	4.4953	0.00128435	11.8748	0.00212523	23.0947	0.0628842	-0.777331	27.7254	3.62149	-0.629452	0.0582004	16.1257	0.0220216	-0.236332	-0.09	0.135492	STD	0.6132	0.849532	0.822137	-3	3	0.585806	0.585806	1.03528	-0.0214829	0.584988	0.584988	-1.78	-0.235424	line2	-0.235424	-15	15
2021-06-30 05:03:43	ETH-3	480	STD	25	18613.5	19182	-136.802	-139.613	96	1.51697	0.00144437	7.11199	-1.58421	0.00183144	4.47343	0.00137261	11.8346	0.00185513	22.927	0.0514945	-0.861789	14.4222	2.28089	-13.4657	0.0312332	16.1037	0.0135872	-0.196481	-0.09	0.0840526	STD	0.6132	0.809681	0.825313	-3	3	0.628832	0.628832	1.03528	-0.0214829	0.629532	0.629532	-1.78	-0.195793	-0.195793	line1	-15	15	-1.72677
2021-06-30 06:52:49	ETH-3	480	STD	28	20428.4	20992.9	-146.571	-148.918	92	1.52076	0.00154163	7.0512	-1.64448	0.00208425	4.47488	0.0014803	11.7736	0.00211177	22.6803	0.0543071	-0.982254	7.75325	2.11329	-19.8367	0.0175531	16.0378	0.0152156	-0.203528	-0.09	0.0912647	STD	0.6132	0.816728	0.804223	-3	3	0.600695	0.600695	1.03528	-0.0214829	0.600403	0.600403	-1.78	-0.135521	line2	-0.135521	-15	15
2021-06-30 08:43:19	ETH-3	480	STD	31	21106.8	21603	-150.115	-152.095	94	1.5322	0.00190085	7.0396	-1.65598	0.00323017	4.48519	0.001873	11.762	0.00327366	22.5999	0.0614806	-1.03783	10.0458	3.31879	-17.596	0.0233843	16.0681	0.0181479	-0.173061	-0.09	0.0985875	STD	0.6132	0.786261	0.798654	-3	3	0.625593	0.625593	1.03528	-0.0214829	0.626179	0.626179	-1.78	-0.124022	-0.124022	line1	-15	15	-1.79321
2021-06-30 10:25:15	ETH-3	480	STD	34	15561.1	15910.2	-118.901	-121.12	79	1.48276	0.00164009	6.98309	-1.712	0.00427722	4.4369	0.00162258	11.7052	0.00433243	22.7401	0.0555668	-0.788634	34.8101	3.92595	6.65322	0.0735108	15.9548	0.0199892	-0.179773	-0.09	0.122996	STD	0.6132	0.792973	0.789617	-3	3	0.609844	0.609844	1.03528	-0.0214829	0.609874	0.609874	-1.78	-0.0680039	line2	-0.0680039	-15	15
2021-06-30 14:00:37	ETH-3	480	STD	40	19175.9	19560.8	-139.46	-141.6	90	1.53604	0.00168314	7.1205	-1.57577	0.00156302	4.4916	0.00159241	11.8432	0.00158345	22.8603	0.0628544	-0.943871	14.5667	2.77684	-13.3607	0.0323409	16.1404	0.0204933	-0.187344	-0.09	0.126	STD	0.6132	0.800544	0.783771	-3	3	0.596428	0.596428	1.03528	-0.0214829	0.595985	0.595985	-1.78	-0.20423	line2	-0.20423	-15	15
2021-06-30 15:34:33	ETH-3	480	STD	43	17931.3	18173	-132.74	-134.125	84	1.51509	0.00236392	7.01397	-1.68139	0.00393051	4.46827	0.00232403	11.7362	0.00398342	22.7056	0.0721546	-0.883732	24.9191	4.58924	-3.06278	0.0542621	16.0446	0.0223305	-0.153799	-2.3404	0.117911	STD	0.6132	0.766999	0.780385	-3	2	0.626585	0.626585	1.03528	-0.0214829	0.627206	0.627206	-1.78	-0.0986142	-0.0986142	line1	-15	15	-1.7927
2021-06-30 17:01:47	ETH-3	480	STD	46	21383.3	22328.1	-151.368	-155.288	94	1.4937	0.00140839	7.02293	-1.6725	0.00231086	4.44853	0.00134961	11.7452	0.0023407	22.5023	0.0569561	-1.1	-5.0195	1.63431	-32.1792	-0.0108433	16.0261	0.0143916	-0.160411	#DIV/0!	0.0865935	STD	0.6132	0.773611	0.770305	-3	0	0.609894	0.609894	1.03528	-0.0214829	0.609926	0.609926	-1.78	-0.107496	line2	-0.107496	-15	15
2021-07-01 07:32:04	ETH-2	481	STD	2	21840.6	22511.7	0	0	104	-10.3979	0.00158432	0	-18.7405	0.0023304	-7.29126	0.00153975	-5.51968	0.00236166	-11.4833	0.0536475	-0.479742	58.0998	2.88008	78.0474	0.0668088	-13.3921	0.0166737	-0.490171	0	0.100629	STD	0.2085	non ETH-3	0.817225	-6	6	0.327055	0.327055	1.03528	-0.0214829	0.317109	0.317109	-18.69	0.050494	line2	0.050494	-15	15
2021-07-01 07:32:04	ETH-3	481	STD	7	22213.1	22997.7	0	0	98	1.51029	0.00179691	0	-1.65201	0.00201753	4.46582	0.00170892	11.8071	0.00204401	22.94	0.0619429	-0.794752	78.4011	2.28551	48.8194	0.0974173	16.0607	0.0185901	-0.204025	0	0.106696	STD	0.6132	0.817225	0.817225	-3	3	0.6132	0.6132	1.03528	-0.0214829	0.613348	0.613348	-1.78	-0.127991	-0.127991	line1	-15	15	-1.71162
2021-07-01 07:32:04	ETH-1	481	STD	12	21584.3	22318.2	0	0	94	1.81867	0.00187256	0	-2.1292	0.00176408	4.73805	0.00178818	11.3246	0.00178822	21.8696	0.0569384	-0.887646	63.1756	3.02384	34.6821	0.0696142	15.4901	0.0142123	-0.576243	0	0.0898997	STD	0.2052	non ETH-3	0.738409	-3	3	0.162165	0.162165	1.03528	-0.0214829	0.146403	0.146403	-2.19	-0.0607951	line2	-0.0607951	-15	15
2021-07-01 07:32:04	ETH-3	481	STD	13	17884.2	18492.6	0	0	86	1.46683	0.0015905	0	-1.66374	0.00178279	4.42468	0.00151175	11.7952	0.00180614	23.0842	0.0507161	-0.630276	82.1147	3.30727	52.5015	0.0934846	16.086	0.0180917	-0.125209	0	0.108961	STD	0.6132	0.738409	0.738409	-3	3	0.6132	0.6132	1.03528	-0.0214829	0.613348	0.613348	-1.78	-0.116265	-0.116265	line1	-15	15	-1.72726
2021-07-01 07:32:04	ETH-3	481	STD	19	22492.5	23431.4	0	0	96	1.50649	0.00245842	0	-1.67683	0.00339291	4.46138	0.00239057	11.782	0.00343902	22.7274	0.0544105	-0.952826	41.2715	4.63353	12.7615	0.0216597	16.0685	0.0155317	-0.167315	0	0.0836971	STD	0.6132	0.780515	0.780515	-3	3	0.6132	0.6132	1.03528	-0.0214829	0.613348	0.613348	-1.78	-0.103168	-0.103168	line1	-15	15	-1.73108
2021-07-01 07:32:04	ETH-2	481	STD	21	19965.2	20282.6	0	0	89	-10.3996	0.00178842	0	-18.799	0.00274101	-7.29492	0.00175416	-5.57892	0.00277822	-11.8949	0.0610045	-0.776905	-11.7665	5.12622	6.98502	-0.0285601	-13.5338	0.022113	-0.571324	0	0.128338	STD	0.2085	non ETH-3	0.780515	-3	3	0.209192	0.209192	1.03528	-0.0214829	0.195088	0.195088	-18.69	0.108999	0.108999	line1	-15	15	-18.8532
2021-07-01 07:32:04	ETH-3	481	STD	25	16745.7	17081.5	0	0	82	1.49839	0.00169989	0	-1.7008	0.00210645	4.45295	0.00157956	11.7577	0.00213202	22.6977	0.0602549	-0.933874	33.048	3.61357	4.82066	0.0288645	16.0094	0.0205087	-0.193206	0	0.130007	STD	0.6132	0.806406	0.806013	-3	3	0.612807	0.612807	1.03528	-0.0214829	0.612942	0.612942	-1.78	-0.0791955	-0.0791955	line1	-15	15	-1.75386
2021-07-01 07:32:04	IAEA-C2	481	NW	26	24820.3	25545.7	0	0	91	-8.39331	0.00201387	0	-8.9087	0.00267538	-5.0673	0.00196794	4.43898	0.0027124	7.88828	0.049007	-1.00053	-8.05969	3.16201	-11.3143	-0.0377609	-1.05169	0.018021	-0.163965	0	0.101666	sample	sample	non ETH-3	0.806013	-3	3	0.642048	sample	1.03528	-0.0214829	0.643214	0.643214	sample	sample	line2	sample	-15	15
2021-07-01 07:32:04	ETH-3	481	STD	28	14518.7	14764.1	0	0	80	1.50645	0.0017139	0	-1.63598	0.00191567	4.46278	0.00161951	11.8234	0.00194025	22.9663	0.0703955	-0.80114	57.5452	4.65517	28.5066	0.0804241	16.0853	0.0184809	-0.19242	0	0.111155	STD	0.6132	0.80562	0.806013	-3	3	0.613593	0.613593	1.03528	-0.0214829	0.613755	0.613755	-1.78	-0.144019	line2	-0.144019	-15	15
2021-07-01 07:32:04	ETH-1	481	STD	29	15590.3	16051.2	0	0	76	1.77578	0.00135273	0	-2.17518	0.00174971	4.69626	0.00126445	11.278	0.00177135	21.7182	0.0487583	-0.943515	51.3283	4.74392	23.2905	0.0502417	15.3954	0.0201216	-0.581292	0	0.123445	STD	0.2052	non ETH-3	0.80562	-3	2	0.224328	0.224328	1.03528	-0.0214829	0.210759	0.210759	-2.19	-0.0148152	-0.0148152	line1	-15	15	-2.2172
2021-07-01 07:32:04	ETH-2	481	STD	30	16293.5	16479.9	0	0	78	-10.3837	0.00148724	0	-18.7242	0.00181113	-7.27743	0.00142153	-5.5032	0.00183505	-11.7532	0.0639154	-0.785753	-1.5341	5.32821	17.2409	-0.00651014	-13.4449	0.0164424	-0.574289	0	0.100832	STD	0.2085	non ETH-3	0.80562	-3	1	0.231331	0.231331	1.03528	-0.0214829	0.218008	0.218008	-18.69	0.0342441	line2	0.0342441	-15	15
2021-07-02 10:08:29	ETH-2	482	STD	2	19998.4	20327.2	0	0	87	-10.3838	0.00200075	0	-18.733	0.00251678	-7.27787	0.00193215	-5.51207	0.00255085	-11.7678	0.0521497	-0.782757	-15.0835	4.26816	3.4545	-0.0441888	-13.4309	0.0211771	-0.550901	0	0.119994	STD	0.2085	non ETH-3	0.805346	-1	3	0.254445	0.254445	1.03528	-0.0214829	0.241938	0.241938	-18.69	0.0430026	line2	0.0430026	-15	15
2021-07-02 10:08:29	ETH-1	482	STD	3	17347.1	17700.9	0	0	87	1.84244	0.00174573	0	-2.14273	0.00238082	4.75984	0.00168128	11.311	0.0024125	21.6465	0.0642808	-1.07887	25.6424	3.96088	-1.84203	0.0280886	15.4755	0.0196391	-0.599795	0	0.111161	STD	0.2052	non ETH-3	0.805346	-2	3	0.205551	0.205551	1.03528	-0.0214829	0.191319	0.191319	-2.19	-0.0472724	-0.0472724	line1	-15	15	-2.18475
2021-07-02 10:08:29	ETH-3	482	STD	4	18830.6	19449.3	0	0	87	1.52193	0.00162411	0	-1.67555	0.00205627	4.4759	0.0015361	11.7833	0.00208255	22.7906	0.0605719	-0.893722	24.6643	3.10993	-3.40804	0.0108086	16.0598	0.0154005	-0.192146	0	0.0919727	STD	0.6132	0.805346	0.795333	-3	3	0.603187	0.603187	1.03528	-0.0214829	0.602982	0.602982	-1.78	-0.104449	line2	-0.104449	-15	15
2021-07-02 10:08:29	ETH-3	482	STD	7	17131.6	17406.8	0	0	82	1.46288	0.00178032	0	-1.66032	0.00204869	4.4211	0.0017009	11.7986	0.00207593	22.7772	0.0550413	-0.937007	30.1089	3.86232	1.91597	0.0429871	16.038	0.0195246	-0.17212	0	0.113886	STD	0.6132	0.78532	0.801373	-3	3	0.629253	0.629253	1.03528	-0.0214829	0.629968	0.629968	-1.78	-0.119676	-0.119676	line1	-15	15	-1.73241
2021-07-02 10:08:29	ETH-3	482	STD	10	17706.3	18200.7	0	0	82	1.55484	0.0012707	0	-1.52296	0.00240122	4.51206	0.00123148	11.9379	0.00243243	23.195	0.0538324	-0.803977	24.0906	3.57575	-4.30327	0.0152306	16.2419	0.0191347	-0.200253	0	0.116832	STD	0.6132	0.813453	0.81141	-3	3	0.611157	0.611157	1.03528	-0.0214829	0.611233	0.611233	-1.78	-0.257041	line2	-0.257041	-15	15
2021-07-02 10:08:29	ETH-1	482	STD	12	17957.1	18462.4	0	0	82	1.80727	0.00130284	0	-2.23463	0.0024218	4.72368	0.00125819	11.2179	0.00245317	21.419	0.0596007	-1.11737	26.0024	4.06911	-1.27264	0.0179375	15.3267	0.0199872	-0.618653	0	0.117915	STD	0.2052	non ETH-3	0.824454	-3	3	0.205801	0.205801	1.03528	-0.0214829	0.191578	0.191578	-2.19	0.0446339	line2	0.0446339	-15	15
2021-07-02 10:08:29	ETH-3	482	STD	13	18851.2	19364.4	0	0	86	1.51788	0.00153817	0	-1.741	0.00200571	4.46981	0.00145404	11.7171	0.00203127	22.5853	0.0593284	-0.963384	31.5858	2.93002	3.45952	0.0296725	15.9574	0.0203681	-0.222256	0	0.127609	STD	0.6132	0.835456	0.824454	-3	3	0.602199	0.602199	1.03528	-0.0214829	0.601959	0.601959	-1.78	-0.038999	-0.038999	line1	-15	15	-1.83275
2021-07-02 10:08:29	ETH-3	482	STD	19	16279.4	16622.8	0	0	79	1.55386	0.00140907	0	-1.64744	0.00257986	4.50679	0.0013165	11.8119	0.00261184	22.7324	0.0698455	-1.00685	32.3931	4.03908	4.02066	0.0378762	16.104	0.0194213	-0.20802	0	0.119359	STD	0.6132	0.82122	0.831937	-3	3	0.623917	0.623917	1.03528	-0.0214829	0.624444	0.624444	-1.78	-0.132555	-0.132555	line1	-15	15	-1.76955
2021-07-02 10:08:29	ETH-3	482	STD	22	16280.6	16530.7	0	0	83	1.54207	0.00141209	0	-1.57953	0.0021252	4.49812	0.00135239	11.8806	0.00215284	22.8522	0.0500669	-1.02556	32.3659	4.70479	3.86899	0.0405437	16.1411	0.0235005	-0.229454	0	0.139675	STD	0.6132	0.842654	0.8264	-3	3	0.596946	0.596946	1.03528	-0.0214829	0.596521	0.596521	-1.78	-0.200469	line2	-0.200469	-15	15
2021-07-02 10:08:29	ETH-3	482	STD	25	16447.4	16895.3	0	0	78	1.51885	0.00183822	0	-1.58283	0.0025082	4.47625	0.00174709	11.8772	0.00254052	22.9207	0.0531532	-0.952046	32.4897	4.54289	4.01921	0.0302624	16.1427	0.0209486	-0.202126	0	0.121732	STD	0.6132	0.815326	0.82899	-3	3	0.626864	0.626864	1.03528	-0.0214829	0.627495	0.627495	-1.78	-0.197174	-0.197174	line1	-15	15	-1.71774
2021-07-02 10:08:29	Merck	482	TA	36	19176.3	18984.9	0	0	86	-42.2502	0.00261228	0	-15.6204	0.00351729	-37.0243	0.00255127	-2.42758	0.0035656	-5.6755	0.0562578	-0.830602	-32.7126	5.63941	11.8524	-0.0375987	-40.773	0.0209159	-0.287038	0	0.120163	sample	sample	non ETH-3	0.833871	-3	3	0.546833	sample	1.03528	-0.0214829	0.508158	0.508158	sample	sample	line2	sample	-15	15
2021-07-02 10:08:29	ETH-3	482	STD	37	17637.7	18071	0	0	83	1.49052	0.0015575	0	-1.60906	0.00197873	4.44879	0.00146267	11.8506	0.00200352	22.7644	0.069953	-1.05204	30.9312	3.54406	2.5853	0.0325218	16.0689	0.0242291	-0.220671	0	0.149422	STD	0.6132	0.833871	0.81291	-3	3	0.592239	0.592239	1.03528	-0.0214829	0.591648	0.591648	-1.78	-0.170939	-0.170939	line1	-15	15	-1.71936
2021-07-02 10:08:29	IAEA-C2	482	TA	39	20973.2	21415	0	0	94	-8.33895	0.00189958	0	-8.90439	0.00205339	-5.01621	0.00181398	4.44345	0.00208084	8.0339	0.0449204	-0.865097	-11.3624	2.9077	-14.6684	-0.035151	-0.988756	0.0194986	-0.158333	0	0.116034	sample	sample	non ETH-3	0.81291	-3	3	0.654577	sample	1.03528	-0.0214829	0.643336	0.643336	sample	sample	sample	line1	-15	15	-9.01469
2021-07-02 10:08:29	ETH-3	482	STD	40	19225.1	19959.7	0	0	87	1.4883	0.00159207	0	-1.76605	0.00281155	4.44122	0.00152636	11.6916	0.00284774	22.6084	0.0441807	-0.890592	17.0163	2.55964	-10.6339	-0.00755823	15.9467	0.0132932	-0.178749	0	0.080883	STD	0.6132	0.791949	0.794242	-3	3	0.615493	0.615493	1.03528	-0.0214829	0.615722	0.615722	-1.78	-0.0139514	line2	-0.0139514	-15	15
2021-07-02 10:08:29	ETH-3	482	STD	43	18879.7	19485.3	0	0	85	1.45151	0.00215036	0	-1.81722	0.00283238	4.40497	0.00208537	11.6397	0.00287092	22.395	0.0478075	-0.996634	26.2341	5.70716	-1.52874	0.00832871	15.8932	0.0224312	-0.143705	0	0.12448	STD	0.6132	0.756905	0.774427	-3	3	0.630722	0.630722	1.03528	-0.0214829	0.631489	0.631489	-1.78	0.0372211	0.0372211	line1	-15	15	-1.88408
2021/07/05 21:10:48	IAEA-C2	483	RP	18	21071.9	21288.7	-144.827	-145.863	98	-8.36687	0.00204882	-0.235301	-8.86806	0.00293908	-5.04292	0.00199801	4.43909	0.00297897	8.19589	0.0507698	-0.695852	13.6727	4.30904	10.3169	0.0265308	-1.04896	0.0211775	-0.187935	-0.09	0.11392	sample	sample	non ETH-3	0.887539	-9	15	0.699604	sample	1.03528	-0.0214829	0.612245	0.612245	sample	sample	line2	sample	-15	15
2021/07/06 19:25:52	ETH-2	484	STD	2	16648.7	16751.1	-121.963	-123.126	84	-10.3614	0.00195336	-10.1128	-18.6603	0.00225043	-7.25513	0.00186934	-5.47949	0.00228047	-11.7159	0.0818098	-0.795749	24.3026	5.17993	43.4876	0.0594219	-13.4404	0.0217216	-0.617045	-0.427303	0.129721	STD	0.2085	non ETH-3	0.887539	-6	6	0.270494	0.270494	1.03528	-0.0214829	0.258553	0.258553	-18.69	-0.0296909	line2	-0.0296909	-15	15
2021/07/06 22:18:54	ETH-3	484	STD	7	13653.7	13742.8	-104.81	-105.232	83	1.55904	0.00128077	7.11237	-1.58383	0.00193332	4.51286	0.00121306	11.8351	0.00195788	23.0152	0.060283	-0.776515	29.8248	3.53726	1.47091	0.0710515	16.0662	0.0181492	-0.274339	-0.09	0.115586	STD	0.6132	0.887539	0.810295	-3	3	0.535956	0.535956	1.03528	-0.0214829	0.53338	0.53338	-1.78	-0.196166	-0.196166	line1	-15	15	-1.71068
2021/07/07 11:50:56	ETH-3	484	STD	13	17472.9	17786	-127.436	-129.103	82	1.53194	0.00195029	7.11406	-1.58216	0.00188459	4.48754	0.00185044	11.8367	0.00190946	22.9223	0.0672813	-0.870484	24.0605	3.19829	-4.11148	0.0684129	16.1984	0.0187651	-0.119851	-0.09	0.107761	STD	0.6132	0.733051	0.811127	-3	3	0.691275	0.691275	1.03528	-0.0214829	0.694178	0.694178	-1.78	-0.197843	-0.197843	line1	-15	15	-1.70901
2021/07/07 13:40:33	ETH-3	484	STD	16	19443.9	19839.8	-138.091	-139.593	88	1.56539	0.00198231	7.17712	-1.51965	0.00209686	4.52107	0.00188068	11.9001	0.00212427	22.9035	0.0502762	-1.01399	19.1845	3.72219	-9.01061	0.0504389	16.2149	0.0176039	-0.19959	-0.09	0.103983	STD	0.6132	0.81279	0.79192	-3	3	0.59233	0.59233	1.03528	-0.0214829	0.591742	0.591742	-1.78	-0.260355	line2	-0.260355	-15	15
2021/07/07 15:26:23	ETH-3	484	STD	19	17416.5	17846.1	-127.109	-129.043	81	1.50635	0.00158278	7.10439	-1.59174	0.0019159	4.46322	0.00148707	11.827	0.00193992	22.6359	0.065134	-1.13098	14.1642	3.33679	-13.6913	0.0356196	16.0649	0.0216649	-0.216718	-0.09	0.137425	STD	0.6132	0.829918	0.790849	-3	3	0.574131	0.574131	1.03528	-0.0214829	0.572902	0.572902	-1.78	-0.188258	-0.188258	line1	-15	15	-1.66606
2021/07/07 16:41:25	ETH-2	484	STD	21	19029.9	19293.2	-135.805	-136.549	84	-10.4027	0.00193101	-10.2583	-18.8045	0.00304614	-7.29887	0.00188673	-5.62558	0.00308703	-12.1639	0.0512479	-0.955119	-7.13358	3.73752	11.8021	-0.0170113	-13.5682	0.0195226	-0.556795	-0.496796	0.111232	STD	0.2085	non ETH-3	0.779879	-3	3	0.223084	0.223084	1.03528	-0.0214829	0.209471	0.209471	-18.69	0.114521	0.114521	line1	-15	15	-18.8788
2021/07/07 17:16:40	ETH-3	484	STD	22	18103	18386.8	-130.753	-131.733	85	1.38787	0.00180796	6.86012	-1.8339	0.00208071	4.34372	0.00172471	11.5815	0.0021082	22.1776	0.0620665	-1.09412	15.1266	3.4124	-12.1595	0.0365467	15.7996	0.01834	-0.11664	-0.09	0.105986	STD	0.6132	0.72984	0.788735	-3	3	0.672095	0.672095	1.03528	-0.0214829	0.674321	0.674321	-1.78	0.0539034	line2	0.0539034	-15	15
2021/07/07 19:01:56	ETH-3	484	STD	25	17241.9	17546.6	-126.243	-127.478	82	1.50991	0.00138645	7.08245	-1.6135	0.00197278	4.46579	0.00131587	11.805	0.00199803	22.772	0.0625059	-0.95454	14.4692	3.35585	-13.3552	0.0344691	16.0697	0.0217513	-0.193246	-0.09	0.132202	STD	0.6132	0.806446	0.768143	-3	1	0.574897	0.574897	1.03528	-0.0214829	0.573694	0.573694	-1.78	-0.166502	-0.166502	line1	-15	15	-1.68739
2021/07/07 19:40:21	IAEA-C2	484	TA	26	18474	18623	-133.455	-133.543	85	-8.32882	0.00188243	-0.223687	-8.85655	0.00221073	-5.00687	0.00179175	4.45083	0.00223966	7.99615	0.0609474	-0.917184	-0.701729	4.04307	-4.07079	-0.00137967	-0.949642	0.0219968	-0.137395	#DIV/0!	0.131552	sample	sample	non ETH-3	0.806446	-3	0	0.669051	sample	1.03528	-0.0214829	0.665326	0.665326	sample	sample	line2	sample	-15	15
2021/07/08 11:21:56	ETH-2	485	STD	2	27816	28818.3	-178.608	-182.174	109	-10.4551	0.00301062	-10.3187	-18.8644	0.00464867	-7.35003	0.00295462	-5.6863	0.0047118	-12.0329	0.0516767	-0.700627	-1.15626	2.94148	18.0711	-0.00190019	-13.6688	0.0229771	-0.545513	-1.61514	0.123601	STD	0.2085	non ETH-3	0.771668	-1	3	0.226154	0.226154	1.03528	-0.0214829	0.212649	0.212649	-18.69	0.174384	line2	0.174384	-15	15
2021/07/08 11:58:15	ETH-1	485	STD	3	22629.1	23331.6	-154.883	-157.171	95	1.73907	0.00161687	6.41871	-2.27151	0.0022183	4.65744	0.00155868	11.1392	0.00224782	21.3137	0.0502484	-1.06492	12.1196	1.23229	-14.5666	0.0371555	15.2413	0.0137195	-0.558458	-1.05904	0.0826793	STD	0.2052	non ETH-3	0.771668	-2	3	0.213209	0.213209	1.03528	-0.0214829	0.199247	0.199247	-2.19	0.0815082	0.0815082	line1	-15	15	-2.30437
2021/07/08 12:33:45	ETH-3	485	STD	4	15123	15489.7	-113.969	-115.851	75	1.42586	0.001838	6.87218	-1.82195	0.00209644	4.37973	0.00173229	11.5937	0.00212304	22.4381	0.0693676	-0.863601	32.5708	3.66409	4.75369	0.094944	15.8067	0.0215182	-0.158468	-0.09	0.124852	STD	0.6132	0.771668	0.75161	-3	3	0.593142	0.593142	1.03528	-0.0214829	0.592583	0.592583	-1.78	0.0419509	line2	0.0419509	-15	15
2021/07/08 14:19:40	ETH-3	485	STD	7	16462.5	16500.7	-121.625	-121.752	80	1.42263	0.00218048	6.88168	-1.81253	0.00233528	4.37703	0.00208754	11.6033	0.00236684	22.3987	0.063855	-0.920958	26.8942	4.42077	-0.786143	0.0727476	15.8541	0.0228319	-0.118353	-0.09	0.130545	STD	0.6132	0.731553	0.75161	-3	3	0.633258	0.633258	1.03528	-0.0214829	0.634114	0.634114	-1.78	0.0325305	0.0325305	line1	-15	15	-1.82164
2021/07/08 20:18:16	IAEA-C2	485	NdW	11	21995.1	22251.5	-151.029	-152.858	100	-8.38842	0.00348312	-0.375482	-9.00703	0.00440424	-5.06799	0.00340463	4.29834	0.00446585	8.1762	0.0683367	-0.435273	57.5667	5.44862	54.3831	0.172827	-1.18008	0.0185664	-0.155438	0.232946	0.0922252	sample	sample	non ETH-3	0.806363	-3	3	0.650925	sample	1.03528	-0.0214829	0.646376	0.646376	sample	sample	sample	line1	-15	15	-8.99522
2021/07/08 21:30:11	ETH-3	485	STD	13	23743.4	24698.4	-160.72	-164.155	100	1.46403	0.00186223	6.98607	-1.70905	0.00251203	4.41945	0.00179473	11.7081	0.00254552	22.3718	0.0474683	-1.15435	26.7422	1.53249	-1.18188	0.0741148	15.8498	0.0211934	-0.267974	0.089633	0.122032	STD	0.6132	0.881174	0.876845	-3	3	0.60887	0.60887	1.03528	-0.0214829	0.608866	0.608866	-1.78	-0.0709539	-0.0709539	line1	-15	15	-1.71436
2021/07/08 23:15:38	ETH-3	485	STD	16	24732.5	25643.2	-164.88	-168.159	103	1.45932	0.00196479	7.00154	-1.69371	0.00330827	4.41558	0.00190495	11.7236	0.00335172	22.3458	0.0534241	-1.21039	32.4165	2.28658	4.31168	0.0870967	15.8699	0.0208923	-0.259315	-0.162756	0.120261	STD	0.6132	0.872515	0.876845	-3	3	0.61753	0.61753	1.03528	-0.0214829	0.617831	0.617831	-1.78	-0.0862896	line2	-0.0862896	-15	15
2021/07/09 02:09:33	ETH-2	485	STD	21	21064.8	21390.1	-147.019	-147.831	97	-10.4448	0.00243128	-10.2773	-18.8234	0.00247644	-7.33899	0.00233686	-5.64478	0.00251074	-12.0138	0.060947	-0.764786	14.9065	3.47016	34.3464	0.0377629	-13.6229	0.0234258	-0.551545	-0.09	0.135311	STD	0.2085	non ETH-3	0.811085	-6	6	0.259539	0.259539	1.03528	-0.0214829	0.247212	0.247212	-18.69	0.133396	0.133396	line1	-15	15	-18.8101
2021/07/09 04:23:53	ETH-3	485	STD	25	21744.8	22814.1	-150.735	-155.007	93	1.4402	0.00129911	6.95672	-1.73814	0.00249895	4.3961	0.00125103	11.6786	0.00253109	22.4244	0.0507121	-1.04468	16.9436	1.8752	-10.6327	0.0421313	15.8643	0.0167043	-0.201095	-0.160516	0.107064	STD	0.6132	0.814295	0.780369	-3	3	0.579274	0.579274	1.03528	-0.0214829	0.578226	0.578226	-1.78	-0.041857	-0.041857	line1	-15	15	-1.73609
2021/07/09 05:54:03	ETH-3	485	STD	28	20138.5	20569.4	-142.329	-143.788	89	1.46469	0.00212242	6.94696	-1.74782	0.00263119	4.41871	0.00204981	11.6689	0.00266692	22.3409	0.0552058	-1.10693	29.5259	2.90564	1.60296	0.0719006	15.9472	0.0161971	-0.133243	-0.09	0.0962305	STD	0.6132	0.746443	0.780369	-3	3	0.647126	0.647126	1.03528	-0.0214829	0.648471	0.648471	-1.78	-0.0321797	line2	-0.0321797	-15	15
2021/07/09 12:15:31	ETH-3	485	STD	40	18863.7	19703.7	-135.155	-138.644	87	1.40896	0.00209409	6.76206	-1.93112	0.00534305	4.36007	0.00210054	11.4832	0.00541285	22.0465	0.0504262	-1.02792	29.567	3.32021	2.06639	0.071891	15.6826	0.0201097	-0.153017	-0.087618	0.105116	STD	0.6132	0.766217	0.74539	-3	3	0.592373	0.592373	1.03528	-0.0214829	0.591787	0.591787	-1.78	0.151125	line2	0.151125	-15	15
2021/07/09 13:59:58	ETH-3	485	STD	43	14418.7	14542.7	-109.316	-110.24	76	1.45137	0.00146873	6.92697	-1.76763	0.00208219	4.40553	0.00139564	11.6488	0.00210891	22.5346	0.0738023	-0.878074	31.8763	3.73533	3.94295	0.0761732	15.9359	0.0217463	-0.111364	0.0774286	0.129389	STD	0.6132	0.724564	0.764775	-3	3	0.653411	0.653411	1.03528	-0.0214829	0.654978	0.654978	-1.78	-0.0123661	-0.0123661	line1	-15	15	-1.8174
2021/07/09 14:36:27	ETH-1	485	STD	44	20829.8	21627.5	-145.393	-148.755	93	1.77181	0.00158709	6.46402	-2.22659	0.00240258	4.68969	0.00151716	11.1848	0.00243366	21.3504	0.0429591	-1.119	13.7793	2.24774	-13.0719	0.034087	15.315	0.0195208	-0.563248	-0.228714	0.115906	STD	0.2052	non ETH-3	0.764054	-3	2	0.200806	0.200806	1.03528	-0.0214829	0.186407	0.186407	-2.19	0.0365911	line2	0.0365911	-15	15
2021/07/09 15:12:00	ETH-2	485	STD	45	16055.1	16284.5	-119.315	-120.145	76	-10.4452	0.0017155	-10.3309	-18.8765	0.00305403	-7.34123	0.00166569	-5.69851	0.003094	-12.1533	0.0548622	-0.797916	-5.7231	3.36556	13.432	-0.0138563	-13.6961	0.0204475	-0.570275	-0.09	0.129037	STD	0.2085	non ETH-3	0.764054	-3	1	0.193779	0.193779	1.03528	-0.0214829	0.179132	0.179132	-18.69	0.186465	0.186465	line1	-15	15	-18.9501
2021/07/09 15:48:34	ETH-3	485	STD	46	16628.4	17369.7	-122.045	-126.237	84	1.32309	0.00161462	6.73886	-1.95412	0.00241704	4.2788	0.0015209	11.4597	0.00244742	22.3487	0.0687608	-0.686169	34.9019	2.92509	7.39225	0.0826636	15.5367	0.0181658	-0.190343	#DIV/0!	0.11279	STD	0.6132	0.803543	0.764054	-3	0	0.57371	0.57371	1.03528	-0.0214829	0.572466	0.572466	-1.78	0.174115	line2	0.174115	-15	15
2021/07/15 15:56:16	ETH-3	487	STD	1	18857.9	18996.4	-125.432	-126.149	87	1.60234	0.00148684	7.13529	-1.56111	0.00162523	4.55424	0.00140562	11.8582	0.00164613	21.9891	0.0820361	-1.82436	37.744	3.36	9.08231	0.0740586	16.3334	0.018771	-0.0764013	-0.09	0.113692	STD	0.6132	0.689601	0.728988	0	3	0.652586	0.652586	1.03528	-0.0214829	0.654124	0.654124	-1.78	-0.218891	-0.218891	line1	-15	15	-1.63471
2021/07/15 16:34:00	ETH-2	487	STD	2	17935.6	17988.4	-121.184	-121.486	82	-10.344	0.00108201	-10.0762	-18.624	0.00176415	-7.23749	0.00101509	-5.44266	0.00178613	-11.5767	0.0616646	-0.72901	-9.40536	3.15701	9.05641	-0.0176772	-13.3239	0.0200778	-0.553708	-0.541049	0.124311	STD	0.2085	non ETH-3	0.728988	-1	3	0.17528	0.17528	1.03528	-0.0214829	0.15998	0.15998	-18.69	-0.0660227	line2	-0.0660227	-15	15
2021/07/15 17:11:21	ETH-1	487	STD	3	16225.1	16471.3	-112.837	-114.287	78	1.87408	0.00135884	6.6645	-2.02783	0.00243301	4.79248	0.00126353	11.3862	0.00246294	21.8088	0.0642856	-1.06875	30.1027	2.91987	2.31774	0.0584534	15.6311	0.021142	-0.553361	-0.514445	0.134196	STD	0.2052	non ETH-3	0.728988	-2	3	0.175626	0.175626	1.03528	-0.0214829	0.160339	0.160339	-2.19	-0.162165	-0.162165	line1	-15	15	-2.10144
2021/07/15 17:47:38	ETH-3	487	STD	4	17679	18080.5	-120.587	-122.71	83	1.55543	0.00154987	7.17512	-1.52163	0.00197759	4.51167	0.00143401	11.8981	0.00200132	23.04	0.046982	-0.87669	37.1048	3.08342	8.42817	0.0729727	16.2482	0.0166541	-0.155174	-0.09	0.102932	STD	0.6132	0.768374	0.728988	-3	3	0.573814	0.573814	1.03528	-0.0214829	0.572573	0.572573	-1.78	-0.258371	line2	-0.258371	-15	15
2021/07/15 21:40:03	ETH-3	487	STD	10	17450.2	18157.9	-120.221	-123.699	80	1.56369	0.00170157	7.14356	-1.55291	0.00237006	4.51831	0.00156664	11.8664	0.00239834	23.1471	0.0495277	-0.709548	36.4413	2.27358	7.83802	0.0722238	16.1893	0.0166436	-0.189208	-0.09	0.106178	STD	0.6132	0.802408	0.796118	-3	3	0.60691	0.60691	1.03528	-0.0214829	0.606836	0.606836	-1.78	-0.22709	line2	-0.22709	-15	15
2021/07/15 22:59:40	ETH-1	487	STD	12	18081	18518.7	-124.401	-125.922	81	1.87754	0.00132039	6.65903	-2.03326	0.0019088	4.79553	0.00125529	11.3807	0.00193329	21.8276	0.0558393	-1.03955	34.8168	2.9093	6.91183	0.0677698	15.6525	0.0196996	-0.530173	-0.439352	0.117043	STD	0.2052	non ETH-3	0.796118	-3	3	0.265945	0.265945	1.03528	-0.0214829	0.253843	0.253843	-2.19	-0.156737	line2	-0.156737	-15	15
2021/07/15 23:35:47	ETH-3	487	STD	13	19545.2	20281.8	-131.964	-134.999	87	1.55129	0.00121096	7.07697	-1.61893	0.00225473	4.50437	0.00112943	11.7995	0.0022826	22.8467	0.0622116	-0.870935	23.5784	2.26901	-4.52582	0.046712	16.1215	0.0190927	-0.176628	-0.09	0.11876	STD	0.6132	0.789828	0.804013	-3	3	0.627385	0.627385	1.03528	-0.0214829	0.628034	0.628034	-1.78	-0.161069	-0.161069	line1	-15	15	-1.76019
2021/07/16 01:34:36	ETH-3	487	STD	16	18591.4	19114	-127.138	-129.589	87	1.51847	0.00227219	6.90238	-1.79201	0.00330666	4.46755	0.00219538	11.6242	0.00335056	22.5713	0.0425661	-0.793719	32.4067	3.80608	4.44055	0.0631648	15.8796	0.0171154	-0.206602	-0.09	0.0971194	STD	0.6132	0.819802	0.817845	-3	3	0.611243	0.611243	1.03528	-0.0214829	0.611322	0.611322	-1.78	0.0120118	line2	0.0120118	-15	15
2021/07/16 03:27:02	ETH-3	487	STD	19	16844.4	17308.8	-118.684	-120.493	80	1.55153	0.00146092	7.18607	-1.51077	0.00230742	4.50839	0.00136969	11.9091	0.00233614	23.0612	0.0708614	-0.877642	35.1479	3.30248	6.50755	0.0669445	16.1789	0.0180903	-0.230704	-0.09	0.113961	STD	0.6132	0.843904	0.796127	-3	3	0.565423	0.565423	1.03528	-0.0214829	0.563886	0.563886	-1.78	-0.269231	-0.269231	line1	-15	15	-1.67362
2021/07/16 04:48:41	ETH-2	487	STD	21	19333.7	19244.2	-132.096	-131.536	84	-10.3338	0.00223917	-10.0347	-18.5828	0.00254853	-7.22651	0.0021683	-5.401	0.00258399	-11.6498	0.0582464	-0.886605	-3.32976	4.58429	15.1488	-0.00519813	-13.3077	0.0213666	-0.589944	-0.528726	0.122877	STD	0.2085	non ETH-3	0.784289	-3	3	0.194346	0.194346	1.03528	-0.0214829	0.179719	0.179719	-18.69	-0.107157	-0.107157	line1	-15	15	-18.7425
2021/07/16 05:27:23	ETH-3	487	STD	22	18868.3	19152.6	-130.048	-130.583	86	1.52404	0.00191411	7.05862	-1.63712	0.00421132	4.4782	0.00188119	11.7811	0.00426614	22.5641	0.0550769	-1.11051	24.3287	3.32089	-3.73352	0.0467671	16.1422	0.0222783	-0.111475	-0.09	0.123289	STD	0.6132	0.724675	0.793955	-3	3	0.68248	0.68248	1.03528	-0.0214829	0.685072	0.685072	-1.78	-0.142875	line2	-0.142875	-15	15
2021/07/16 07:23:58	ETH-3	487	STD	25	17791.9	18475.7	-124.32	-127.866	86	1.56349	0.0015294	7.1735	-1.52323	0.00209635	4.51916	0.00145795	11.8965	0.00212351	23.2777	0.0528347	-0.641418	25.2851	2.65166	-3.0695	0.0475814	16.2088	0.0190361	-0.200085	-0.09	0.122856	STD	0.6132	0.813285	0.769256	-3	3	0.569171	0.569171	1.03528	-0.0214829	0.567766	0.567766	-1.78	-0.256772	-0.256772	line1	-15	15	-1.68292
2021/07/16 09:18:44	ETH-3	487	STD	28	16983.1	17379.8	-120.515	-122.138	80	1.57653	0.00142788	7.15595	-1.54063	0.00182205	4.53077	0.00133336	11.8789	0.00184449	23.0693	0.0563138	-0.81016	29.7174	3.54315	1.2621	0.0546438	16.2478	0.0221767	-0.156607	-0.09	0.136204	STD	0.6132	0.769807	0.770171	-3	3	0.613563	0.613563	1.03528	-0.0214829	0.613724	0.613724	-1.78	-0.239369	line2	-0.239369	-15	15
2021/07/16 09:58:42	Merck	487	TA	29	23050.3	23231.9	-151.176	-150.907	96	-42.3427	0.00256777	-7.41259	-15.9834	0.00426331	-37.1271	0.00252545	-2.83664	0.00432075	-6.54812	0.0580387	-0.888259	-48.3029	2.83301	-3.55368	-0.0910484	-41.2566	0.0159852	-0.28478	-0.232302	0.0840625	sample	sample	non ETH-3	0.748614	-3	3	0.463833	sample	1.03528	-0.0214829	0.51053	0.51053	sample	sample	sample	line1	-15	15	-16.1557
2021/07/16 11:20:08	ETH-3	487	STD	31	19741.8	20168.3	-134.93	-136.89	91	1.53354	0.002721	6.93468	-1.75999	0.00586491	4.48279	0.00271147	11.6567	0.00594248	22.573	0.0569109	-0.856149	22.914	3.98973	-4.87484	0.0434679	16.0214	0.0234113	-0.11422	-0.09	0.117382	STD	0.6132	0.72742	0.748614	-3	3	0.634394	0.634394	1.03528	-0.0214829	0.63529	0.63529	-1.78	-0.0200083	-0.0200083	line1	-15	15	-1.94521
2021/07/16 17:03:07	IAEA-C2	487	TA	36	17906.3	18199.7	-125.522	-126.532	87	-8.28944	0.00189934	-0.181872	-8.81509	0.00176687	-4.96852	0.00179613	4.49288	0.00178991	8.19673	0.0565652	-0.80204	26.1183	4.77208	22.5328	0.0539903	-0.836908	0.0223064	-0.105493	-0.105066	0.13179	sample	sample	non ETH-3	0.760124	-3	3	0.654631	sample	1.03528	-0.0214829	0.698832	0.698832	sample	sample	line2	sample	-15	15
2021/07/16 17:41:21	ETH-3	487	STD	37	17232.3	17618.1	-122.071	-123.454	80	1.47426	0.00177574	7.05966	-1.63609	0.00181434	4.4316	0.00167339	11.782	0.00183746	22.9318	0.0587959	-0.75316	40.9146	4.14621	12.4467	0.0823002	16.0585	0.0189187	-0.146924	-0.133802	0.110583	STD	0.6132	0.760124	0.794527	-3	3	0.647603	0.647603	1.03528	-0.0214829	0.648965	0.648965	-1.78	-0.143909	-0.143909	line1	-15	15	-1.80722
2021/07/16 19:36:59	ETH-3	487	STD	40	20279	21301.6	-138.299	-142.599	90	1.53604	0.00152671	7.05421	-1.64149	0.00274897	4.48929	0.00149198	11.7767	0.00278525	22.7424	0.0493264	-0.927579	13.5273	2.7555	-14.2419	0.0274269	16.0435	0.0184095	-0.21573	-0.16271	0.111274	STD	0.6132	0.82893	0.818811	-3	3	0.603081	0.603081	1.03528	-0.0214829	0.602873	0.602873	-1.78	-0.138508	line2	-0.138508	-15	15
2021/07/16 21:33:33	ETH-3	487	STD	43	16593	16936.7	-118.867	-120.288	80	1.55573	0.00125247	7.15356	-1.543	0.00207304	4.5112	0.00116688	11.8764	0.00209857	22.981	0.0611646	-0.891598	31.7263	4.28019	3.241	0.0592187	16.1258	0.0194914	-0.25418	-1.81705	0.121562	STD	0.6132	0.86738	0.854805	-3	2	0.600625	0.600625	1.03528	-0.0214829	0.600329	0.600329	-1.78	-0.236998	-0.236998	line1	-15	15	-1.71571
2021/07/16 23:09:56	ETH-3	487	STD	46	21323.3	22786.2	-143.579	-150.005	93	1.49117	0.00141622	7.03394	-1.66159	0.00235826	4.44655	0.00135915	11.7562	0.00238875	22.5754	0.0501782	-1.05039	-4.47722	1.57562	-31.6704	-0.0081482	15.9389	0.0152145	-0.254903	#DIV/0!	0.0973544	STD	0.6132	0.868103	0.867742	-3	0	0.612838	0.612838	1.03528	-0.0214829	0.612974	0.612974	-1.78	-0.118413	line2	-0.118413	-15	15
2021/07/19 12:00:21	ETH-3	488	STD	1	18366.3	18886.9	-122.851	-125.642	81	1.55583	0.00189639	7.17923	-1.51755	0.00176338	4.51218	0.00178105	11.9022	0.00178558	22.9243	0.0595111	-0.99779	49.0798	4.23645	20.0633	0.0944951	16.3198	0.0201983	-0.0893058	-0.09	0.120296	STD	0.6132	0.702506	0.75092	0	3	0.661615	0.661615	1.03528	-0.0214829	0.663471	0.663471	-1.78	-0.262451	-0.262451	line1	-15	15	-1.69026
2021/07/19 12:36:40	ETH-2	488	STD	2	15977.6	16182.2	-110.778	-111.62	76	-10.3432	0.00155626	-10.041	-18.5891	0.00193802	-7.23558	0.00148116	-5.40737	0.00196323	-11.6081	0.0605541	-0.831585	-10.9786	2.7643	7.38148	-0.0209865	-13.2636	0.0233306	-0.529507	-0.497925	0.146309	STD	0.2085	non ETH-3	0.75092	-1	3	0.221413	0.221413	1.03528	-0.0214829	0.207741	0.207741	-18.69	-0.100881	line2	-0.100881	-15	15
2021/07/19 13:14:01	ETH-1	488	STD	3	17626.9	17953.8	-119.965	-121.236	78	1.87518	0.00191096	6.67325	-2.01917	0.00198109	4.79382	0.00180595	11.395	0.00200662	21.7791	0.0771115	-1.11514	30.0585	2.87308	2.2559	0.0575233	15.6612	0.019542	-0.533729	-0.46987	0.121372	STD	0.2052	non ETH-3	0.75092	-2	3	0.217191	0.217191	1.03528	-0.0214829	0.20337	0.20337	-2.19	-0.170835	-0.170835	line1	-15	15	-2.21733
2021/07/19 13:52:37	ETH-3	488	STD	4	19324.6	19828.3	-128.452	-130.928	88	1.57285	0.00148346	7.18322	-1.51359	0.00190608	4.52827	0.00139658	11.9062	0.00193009	23.0328	0.0530963	-0.89983	20.6025	2.5514	-7.65114	0.0402145	16.2422	0.0169877	-0.186135	-0.09	0.103011	STD	0.6132	0.799335	0.75031	-3	3	0.564175	0.564175	1.03528	-0.0214829	0.562594	0.562594	-1.78	-0.266406	line2	-0.266406	-15	15
2021/07/19 15:50:02	ETH-3	488	STD	7	20869.6	21748.9	-137.043	-140.471	91	1.61505	0.00154705	7.08691	-1.60907	0.00318854	4.56446	0.00150852	11.8097	0.00322993	22.8452	0.0543584	-0.892328	16.8687	2.03734	-11.134	0.0329497	16.2356	0.0182332	-0.13589	-0.09	0.107909	STD	0.6132	0.74909	0.782753	-3	3	0.646863	0.646863	1.03528	-0.0214829	0.648199	0.648199	-1.78	-0.170925	-0.170925	line1	-15	15	-1.73391
2021/07/19 17:43:35	ETH-3	488	STD	10	14679.9	15045.2	-104.727	-106.856	75	1.55464	0.00156815	7.14751	-1.549	0.00248609	4.50996	0.00148476	11.8704	0.00251759	23.0321	0.0607991	-0.829695	41.5494	4.21912	12.8062	0.0777466	16.1871	0.0182336	-0.186635	-0.09	0.110315	STD	0.6132	0.799835	0.796886	-3	3	0.610251	0.610251	1.03528	-0.0214829	0.610295	0.610295	-1.78	-0.231003	line2	-0.231003	-15	15
2021/07/19 19:03:42	ETH-1	488	STD	12	17817.7	18342.2	-122.561	-124.639	83	1.83396	0.00217062	6.50504	-2.18592	0.00438838	4.74935	0.00214144	11.2261	0.00444623	21.4439	0.0598835	-1.10918	28.9812	3.753	1.58293	0.0539554	15.4365	0.0184426	-0.545092	-0.420526	0.103771	STD	0.2052	non ETH-3	0.820783	-3	3	0.275691	0.275691	1.03528	-0.0214829	0.263933	0.263933	-2.19	-0.00407619	line2	-0.00407619	-15	15
2021/07/19 19:40:55	ETH-3	488	STD	13	17201.9	17775.7	-118.783	-121.71	81	1.53377	0.00158232	7.12013	-1.57614	0.00206612	4.48946	0.00150933	11.8428	0.00209305	22.8763	0.0609837	-0.927509	28.4546	3.52723	0.147876	0.0528594	16.096	0.0212355	-0.228532	-0.09	0.133652	STD	0.6132	0.841732	0.825655	-3	3	0.597124	0.597124	1.03528	-0.0214829	0.596705	0.596705	-1.78	-0.203861	-0.203861	line1	-15	15	-1.71674
2021/07/19 21:31:56	ETH-3	488	STD	16	13663.4	13840.1	-99.485	-100.784	75	1.61602	0.00151564	7.34183	-1.35636	0.00194969	4.57423	0.00140995	12.0655	0.00197346	23.4789	0.0710227	-0.778804	44.5157	5.55073	15.2368	0.0820416	16.4108	0.0190282	-0.222199	-0.09	0.117799	STD	0.6132	0.835399	0.830753	-3	3	0.608554	0.608554	1.03528	-0.0214829	0.608539	0.608539	-1.78	-0.423645	line2	-0.423645	-15	15
2021/07/19 22:47:41	IAEA-C2	488	RP	18	17076.6	17233.6	-118.869	-119.558	78	-8.30839	0.00138984	-0.155863	-8.78931	0.00201216	-4.98536	0.00130189	4.51895	0.00203716	8.10573	0.0576064	-0.944083	6.68818	3.42157	3.13794	0.0121646	-0.903722	0.0204378	-0.180395	-0.0617093	0.129626	sample	sample	non ETH-3	0.825264	-3	3	0.644869	sample	1.03528	-0.0214829	0.620164	0.620164	sample	sample	line2	sample	-15	15
2021/07/19 23:27:46	ETH-3	488	STD	19	19715.3	20329.2	-132.977	-135.57	88	1.46012	0.00268756	6.80502	-1.88853	0.00537381	4.40949	0.00268435	11.5264	0.00544578	22.2754	0.0539416	-0.889539	17.367	3.16552	-9.94283	0.0323525	15.7271	0.0166173	-0.201929	-0.09	0.0903074	STD	0.6132	0.815129	0.81831	-3	3	0.616381	0.616381	1.03528	-0.0214829	0.616642	0.616642	-1.78	0.108532	0.108532	line1	-15	15	-1.97944
2021/07/20 00:47:16	ETH-2	488	STD	21	17951.8	18206.2	-123.86	-124.706	92	-10.3858	0.00222855	-10.2253	-18.7718	0.00434614	-7.28191	0.00220534	-5.59238	0.00440389	-11.8977	0.0660928	-0.752671	-5.17038	4.53654	13.7173	-0.00886938	-13.4926	0.021596	-0.530556	-0.425778	0.119426	STD	0.2085	non ETH-3	0.809766	-3	3	0.27921	0.27921	1.03528	-0.0214829	0.267577	0.267577	-18.69	0.0817574	0.0817574	line1	-15	15	-18.8627
2021/07/20 01:24:54	ETH-3	488	STD	22	17010.8	17494.4	-118.978	-121.454	80	1.54728	0.00152811	7.18891	-1.50796	0.00183941	4.50451	0.00141475	11.9119	0.00186143	22.9659	0.0515798	-0.976387	27.7553	3.33889	-0.681881	0.0495717	16.2178	0.0199573	-0.191203	-0.09	0.125604	STD	0.6132	0.804403	0.79443	-3	3	0.603227	0.603227	1.03528	-0.0214829	0.603024	0.603024	-1.78	-0.272041	line2	-0.272041	-15	15
2021/07/20 03:19:41	ETH-3	488	STD	25	20887.7	22277.4	-139.388	-145.616	91	1.53592	0.00121801	7.18688	-1.50997	0.00245196	4.4938	0.00115335	11.9098	0.00248281	22.9753	0.0535695	-0.963077	9.83612	2.02139	-18.0902	0.0182723	16.2459	0.013067	-0.150557	-0.09	0.0848063	STD	0.6132	0.763757	0.77463	-3	3	0.624073	0.624073	1.03528	-0.0214829	0.624605	0.624605	-1.78	-0.270027	-0.270027	line1	-15	15	-1.61522
2021/07/20 05:18:06	ETH-3	488	STD	28	19464.4	20205.5	-132.396	-135.764	91	1.43985	0.00262744	6.72826	-1.96462	0.00597734	4.38784	0.00263285	11.4493	0.00605633	22.0597	0.0431204	-0.94813	20.6032	3.2613	-6.62222	0.0369767	15.6888	0.0225922	-0.142531	-0.09	0.115994	STD	0.6132	0.755731	0.759744	-3	3	0.617213	0.617213	1.03528	-0.0214829	0.617503	0.617503	-1.78	0.184624	line2	0.184624	-15	15
2021/07/20 09:07:17	ETH-3	488	STD	34	14738.8	15149.4	-107.167	-109.192	83	1.56606	0.00168721	7.22475	-1.47243	0.00218004	4.52335	0.00158216	11.9479	0.00220721	23.0921	0.0751761	-0.924248	54.0001	5.02712	24.7445	0.0935427	16.2828	0.0218245	-0.181551	-0.09	0.135419	STD	0.6132	0.794751	0.795858	-3	3	0.614307	0.614307	1.03528	-0.0214829	0.614495	0.614495	-1.78	-0.307572	line2	-0.307572	-15	14
2021/07/20 11:05:23	ETH-3	488	STD	37	16193.1	16568.1	-115.098	-117.252	76	1.51417	0.00197375	7.15923	-1.53738	0.00271291	4.47245	0.00190939	11.882	0.0027493	22.9932	0.060037	-0.89075	48.16	4.45035	19.2513	0.0830422	16.1624	0.0235323	-0.183765	-0.09	0.138856	STD	0.6132	0.796965	0.770935	-3	3	0.587169	0.587169	1.03528	-0.0214829	0.5864	0.5864	-1.78	-0.242625	-0.242625	line1	-15	11	-1.7937
2021/07/20 12:19:00	Merck	488	RP	39	19495.2	19503.6	-133.255	-132.88	91	-42.221	0.00257732	-6.96105	-15.5357	0.0029251	-36.9973	0.0024756	-2.38317	0.00296473	-5.36827	0.0723702	-0.610855	-41.5952	3.97201	2.42975	-0.0716616	-40.6148	0.0179442	-0.201429	-0.158248	0.0985058	sample	sample	non ETH-3	0.759027	-3	3	0.557598	sample	1.03528	-0.0214829	0.598073	0.598073	sample	sample	sample	line1	-15	9	-15.7921
2021/07/20 12:58:17	ETH-3	488	STD	40	17918.8	18410.5	-124.914	-127.69	81	1.22549	0.00120215	7.09417	-1.60187	0.00200512	4.1997	0.00113152	11.8161	0.00203024	22.9544	0.0521046	-0.798417	24.9222	3.64247	-2.92894	0.0432863	15.8898	0.020151	-0.107888	-0.09	0.124092	STD	0.6132	0.721088	0.759027	-3	3	0.651139	0.651139	1.03528	-0.0214829	0.652625	0.652625	-1.78	-0.178125	line2	-0.178125	-15	8
2021/07/20 16:50:00	ETH-3	488	STD	46	14121.5	14626.9	-103.74	-106.308	81	1.41081	0.00154382	6.92879	-1.76583	0.00201123	4.3676	0.00145205	11.6505	0.00203649	22.4897	0.0661948	-0.925347	33.1827	4.61061	5.25132	0.0578774	15.8515	0.023511	-0.157126	-0.09	0.143888	STD	0.6132	0.770326	0.770326	-3	0	0.6132	0.6132	1.03528	-0.0214829	0.613348	0.613348	-1.78	-0.0141722	line2	-0.0141722	-15	2
2021/07/20 19:19:07	ETH-2	489	STD	2	21183.3	21814.7	-142.361	-144.77	97	-10.3606	0.00161137	-10.09	-18.6377	0.0021152	-7.25356	0.00154467	-5.45654	0.00214312	-11.8668	0.0494301	-0.99435	-7.48332	2.10354	11.0594	-0.0157783	-13.3066	0.0172744	-0.505808	-0.459193	0.107373	STD	0.2085	non ETH-3	0.797626	-1	3	0.291818	0.291818	1.03528	-0.0214829	0.280629	0.280629	-18.69	-0.0523483	line2	-0.0523483	-15	15
2021/07/20 20:34:38	ETH-3	489	STD	4	20101	20848.5	-137.113	-140.029	93	1.55618	0.00190498	7.12956	-1.5668	0.00233804	4.51078	0.0018258	11.8523	0.00236914	22.9775	0.0631948	-0.847372	38.45	1.9775	9.82669	0.0859447	16.1724	0.0187414	-0.184426	-0.09	0.112853	STD	0.6132	0.797626	0.783208	-3	3	0.598782	0.598782	1.03528	-0.0214829	0.598422	0.598422	-1.78	-0.213202	line2	-0.213202	-15	15
2021/07/20 22:31:12	ETH-3	489	STD	7	20487	21003.7	-138.533	-140.77	94	1.44144	0.00269287	6.84037	-1.85348	0.00805698	4.39322	0.00276056	11.5618	0.00816214	22.2874	0.0467791	-0.947887	44.7742	2.55213	16.6758	0.0997702	15.7922	0.0228066	-0.15559	-0.09	0.100019	STD	0.6132	0.76879	0.784637	-3	3	0.629047	0.629047	1.03528	-0.0214829	0.629755	0.629755	-1.78	0.0734847	0.0734847	line1	-15	15	-1.81947
2021/07/21 00:06:34	ETH-3	489	STD	10	15793.3	16381.4	-113.133	-116.246	76	1.55824	0.00115526	7.14767	-1.54884	0.00200012	4.51334	0.00108788	11.8705	0.00202518	23.0553	0.0635941	-0.807361	45.4773	2.6132	16.6219	0.0976421	16.2034	0.0180307	-0.174296	-0.109936	0.111512	STD	0.6132	0.787496	0.771504	-3	3	0.597207	0.597207	1.03528	-0.0214829	0.596792	0.596792	-1.78	-0.231159	line2	-0.231159	-15	15
2021/07/21 01:22:27	ETH-1	489	STD	12	21238.7	22074.8	-142.315	-145.81	93	1.8364	0.00171194	6.62468	-2.06731	0.00192648	4.75579	0.00160199	11.3462	0.00195033	21.6676	0.0747448	-1.12766	26.0595	2.69129	-1.50031	0.0589324	15.5526	0.0180017	-0.554119	-0.487963	0.10686	STD	0.2052	non ETH-3	0.772861	-3	3	0.218742	0.218742	1.03528	-0.0214829	0.204975	0.204975	-2.19	-0.122687	line2	-0.122687	-15	15
2021/07/21 01:59:08	ETH-3	489	STD	13	20655.5	21376.3	-139.706	-142.636	92	1.56761	0.00177464	7.15031	-1.54622	0.00280476	4.52221	0.00170958	11.8732	0.00284143	22.9648	0.0603596	-0.900978	25.1188	2.05051	-3.18936	0.055848	16.245	0.0176896	-0.145025	-0.0766646	0.111077	STD	0.6132	0.758225	0.760162	-3	3	0.615137	0.615137	1.03528	-0.0214829	0.615354	0.615354	-1.78	-0.233778	-0.233778	line1	-15	15	-1.44959
2021/07/21 03:56:03	ETH-3	489	STD	16	21228	21995	-142.59	-145.835	94	1.551	0.00212897	7.11603	-1.58021	0.00220355	4.50546	0.00203718	11.8388	0.00223344	22.7417	0.0605514	-1.05093	27.524	2.67355	-0.766214	0.0610836	16.2173	0.0170561	-0.121565	-0.0620752	0.09929	STD	0.6132	0.734765	0.770556	-3	3	0.648991	0.648991	1.03528	-0.0214829	0.650402	0.650402	-1.78	-0.199793	line2	-0.199793	-15	15
2021/07/21 04:35:08	IAEA-C2	489	NW	17	16360.5	16511.5	-117.238	-117.626	84	-8.39074	0.00252116	-0.440524	-9.07151	0.00457298	-5.07242	0.00247863	4.23305	0.00463379	7.90492	0.0614957	-0.574275	25.38	3.92576	22.4299	0.0532665	-1.23703	0.0202191	-0.143952	-0.09	0.110747	sample	sample	non ETH-3	0.776722	-3	3	0.63277	sample	1.03528	-0.0214829	0.633608	0.633608	sample	sample	sample	line1	-15	15	-8.97997
2021/07/21 05:55:11	ETH-3	489	STD	19	22092.7	23189.4	-146.987	-151.51	95	1.45285	0.00201395	6.77626	-1.91705	0.00466012	4.40168	0.00202111	11.4975	0.00472167	21.9669	0.0454121	-1.13406	5.35074	2.107	-21.5733	0.0126324	15.6869	0.0168576	-0.205479	-0.111248	0.0980135	STD	0.6132	0.818679	0.779618	-3	3	0.574139	0.574139	1.03528	-0.0214829	0.57291	0.57291	-1.78	0.137046	0.137046	line1	-15	15	-1.8255
2021/07/21 07:15:35	ETH-2	489	STD	21	16655.2	16690.9	-118.557	-118.825	79	-10.3998	0.00302376	-10.3035	-18.8493	0.00715904	-7.29774	0.0030568	-5.67093	0.00725395	-12.0982	0.0824585	-0.797611	19.7726	5.15745	39.3116	0.0419689	-13.6465	0.0229371	-0.592419	-0.491245	0.1192	STD	0.2085	non ETH-3	0.802045	-3	3	0.209626	0.209626	1.03528	-0.0214829	0.195538	0.195538	-18.69	0.159315	0.159315	line1	-15	15	-18.7578
2021/07/21 07:52:36	ETH-3	489	STD	22	15992.3	16180.6	-115.473	-115.97	79	1.4326	0.00179901	7.00762	-1.68768	0.00198243	4.39075	0.0017061	11.7297	0.0020082	22.7031	0.0711159	-0.873186	42.9462	3.60295	14.5697	0.0902912	15.9385	0.0190242	-0.17221	-0.0842321	0.117443	STD	0.6132	0.78541	0.800444	-3	3	0.628233	0.628233	1.03528	-0.0214829	0.628912	0.628912	-1.78	-0.0923235	line2	-0.0923235	-15	15
2021/07/21 09:51:52	ETH-3	489	STD	25	20663.4	21908.2	-139.977	-145.65	92	1.36049	0.00296692	6.56438	-2.1271	0.00693544	4.30778	0.00298437	11.2846	0.00702712	21.7097	0.0561271	-0.965014	13.9204	2.35362	-12.727	0.0315568	15.4006	0.0207401	-0.184042	-0.125175	0.104414	STD	0.6132	0.797242	0.755634	-3	3	0.571592	0.571592	1.03528	-0.0214829	0.570273	0.570273	-1.78	0.347097	0.347097	line1	-15	15	-2.07458
2021/07/21 11:45:18	ETH-3	489	STD	28	19517.3	20219	-134.758	-137.552	91	1.52253	0.00177466	7.10747	-1.58869	0.00212221	4.47849	0.00167383	11.8301	0.00214916	22.7788	0.0481828	-0.997614	26.4032	2.57229	-1.81071	0.0582003	16.232	0.0203428	-0.0710504	-0.0562902	0.127043	STD	0.6132	0.68425	0.754869	-3	3	0.683818	0.683818	1.03528	-0.0214829	0.686458	0.686458	-1.78	-0.191309	line2	-0.191309	-15	15
2021/07/21 13:47:41	ETH-3	489	STD	31	26072.1	27644.5	-164.507	-170.432	105	1.49193	0.0032496	6.84782	-1.8461	0.00691048	4.44079	0.00326835	11.5694	0.00700295	22.013	0.0462131	-1.23101	-3.95448	1.87453	-30.8053	-0.00783669	15.8348	0.0187081	-0.169914	-0.144204	0.0754863	STD	0.6132	0.783114	0.741411	-3	3	0.571497	0.571497	1.03528	-0.0214829	0.570175	0.570175	-1.78	0.066103	0.066103	line1	-15	15	-1.74941
2021/07/21 15:43:12	ETH-3	489	STD	34	21056.9	21977.9	-141.914	-145.908	95	1.55076	0.00186874	7.10461	-1.59152	0.00182015	4.50484	0.0017711	11.8273	0.00184403	22.6688	0.0530702	-1.09948	13.3441	2.01276	-14.533	0.0301283	16.1829	0.0168344	-0.143669	-0.0973742	0.101183	STD	0.6132	0.756869	0.780819	-3	3	0.63715	0.63715	1.03528	-0.0214829	0.638143	0.638143	-1.78	-0.188475	line2	-0.188475	-15	15
2021/07/21 17:43:19	ETH-3	489	STD	37	20532	21379.9	-139.332	-143.134	90	1.52888	0.00164287	7.07656	-1.61934	0.0026184	4.48336	0.00158425	11.7991	0.00265267	22.5601	0.0583594	-1.14997	15.3157	2.68089	-12.5393	0.0347728	16.0863	0.0189826	-0.189273	-0.118526	0.111402	STD	0.6132	0.802473	0.804117	-3	3	0.614843	0.614843	1.03528	-0.0214829	0.61505	0.61505	-1.78	-0.160664	-0.160664	line1	-15	15	-1.51248
2021/07/21 19:35:32	ETH-3	489	STD	40	23486.2	24953.8	-154.058	-159.374	99	1.53509	0.00169575	7.10597	-1.59018	0.00305306	4.49021	0.00164805	11.8286	0.00309303	22.6039	0.0675125	-1.1655	4.56573	1.93602	-23.0574	0.0113235	16.0712	0.0172145	-0.239808	-0.0907084	0.10299	STD	0.6132	0.853008	0.831482	-3	3	0.591674	0.591674	1.03528	-0.0214829	0.591063	0.591063	-1.78	-0.189818	line2	-0.189818	-15	15
2021/07/21 20:19:00	Merck	489	NW	41	18399.3	17977.9	-128.21	-125.214	84	-42.2598	0.00362816	-7.15467	-15.7277	0.00767638	-37.0404	0.00364256	-2.57759	0.00777897	-6.09361	0.0564607	-0.950311	-13.1564	4.44635	32.6179	-0.0274656	-40.9114	0.0271484	-0.272922	-0.09	0.124229	sample	sample	non ETH-3	0.845987	-3	3	0.573065	sample	1.03528	-0.0214829	0.571798	0.571798	sample	sample	sample	line1	-15	15	-15.6334
2021/07/21 21:36:14	ETH-3	489	STD	43	18835.6	19316.5	-130.469	-132.421	89	1.49865	0.00248679	6.90255	-1.79185	0.006243	4.44899	0.0025081	11.6244	0.00632504	22.2501	0.0542272	-1.1078	27.2593	3.38938	-0.548574	0.059349	15.8409	0.024927	-0.225766	0.198939	0.134619	STD	0.6132	0.838966	0.845356	-3	3	0.619591	0.619591	1.03528	-0.0214829	0.619965	0.619965	-1.78	0.0118454	0.0118454	line1	-15	15	-1.6976
2021/07/21 22:13:19	ETH-1	489	STD	44	16679.7	17318.3	-119.161	-122.142	82	1.85617	0.00137207	6.64302	-2.04914	0.00203339	4.77495	0.0012818	11.3646	0.00205852	21.7797	0.0647958	-1.05457	29.1618	3.45111	1.46282	0.062197	15.508	0.0211073	-0.635597	-0.09	0.130074	STD	0.2052	non ETH-3	0.841531	-3	2	0.205934	0.205934	1.03528	-0.0214829	0.191716	0.191716	-2.19	-0.140863	line2	-0.140863	-15	15
2021/07/21 22:54:00	ETH-2	489	STD	45	23597.1	24761.9	-154.437	-158.849	94	-10.3506	0.0026907	-10.2599	-18.8061	0.00559295	-7.2501	0.00268764	-5.62708	0.00566746	-12.2493	0.0520388	-1.03853	-30.255	2.07375	-11.809	-0.06719	-13.5638	0.0189217	-0.601435	#DIV/0!	0.0989899	STD	0.2085	non ETH-3	0.841531	-3	1	0.240095	0.240095	1.03528	-0.0214829	0.227082	0.227082	-18.69	0.116113	0.116113	line1	-15	15	-18.6997
2021/07/21 23:32:57	ETH-3	489	STD	46	16966.1	17606.2	-120.389	-124.091	81	1.53186	0.00151182	7.11652	-1.57972	0.00234692	4.48754	0.00142899	11.8392	0.00237659	22.9752	0.0632021	-0.823676	30.8196	2.69417	2.45699	0.0659504	16.088	0.019226	-0.230895	#DIV/0!	0.114814	STD	0.6132	0.844095	0.841531	-3	0	0.610635	0.610635	1.03528	-0.0214829	0.610693	0.610693	-1.78	-0.200277	line2	-0.200277	-15	15
2021/07/22 15:46:43	ETH-2	490	STD	2	19197.4	19218.3	-131.126	-130.654	79	-10.3836	0.00181316	-10.1185	-18.6659	0.00274334	-7.27614	0.00174775	-5.48517	0.00277942	-11.5405	0.058213	-0.607006	-11.2558	2.79585	7.29745	-0.0248203	-13.4275	0.0183834	-0.576532	-0.514312	0.109315	STD	0.2085	non ETH-3	0.799001	-1	3	0.222469	0.222469	1.03528	-0.0214829	0.208834	0.208834	-18.69	-0.0241264	line2	-0.0241264	-2	15
2021/07/22 16:22:25	ETH-1	490	STD	3	20085.2	20417.3	-135.631	-136.822	87	1.72814	0.00223758	6.23801	-2.45065	0.00493864	4.64092	0.00224044	10.9578	0.00500409	21.0584	0.0624364	-0.956183	15.797	2.18413	-10.6206	0.0364201	15.0456	0.017372	-0.557914	-0.478903	0.0876096	STD	0.2052	non ETH-3	0.799001	-2	3	0.241087	0.241087	1.03528	-0.0214829	0.228109	0.228109	-2.19	0.260646	0.260646	line1	-3	15	-2.27255
2021/07/22 16:56:20	ETH-3	490	STD	4	16903.7	17017.7	-118.623	-119.101	81	1.5383	0.00134403	7.13752	-1.55891	0.00243954	4.49431	0.00128504	11.8603	0.00247073	23.2192	0.0684985	-0.627044	21.8474	2.84795	-6.31621	0.0489003	16.1617	0.0127582	-0.185801	-0.09	0.0729269	STD	0.6132	0.799001	0.79752	-3	3	0.611719	0.611719	1.03528	-0.0214829	0.611815	0.611815	-1.78	-0.221094	line2	-0.221094	-4	15
2021/07/22 18:45:00	ETH-3	490	STD	7	16061.2	16054.8	-113.95	-114.189	84	1.3794	0.00270154	6.64072	-2.05141	0.00675822	4.32815	0.00271656	11.3613	0.00684685	22.1143	0.054383	-0.720863	22.5158	3.65679	-4.52784	0.0492816	15.4987	0.0179326	-0.182838	-0.09	0.0951421	STD	0.6132	0.796038	0.823721	-3	3	0.640883	0.640883	1.03528	-0.0214829	0.642008	0.642008	-1.78	0.271414	0.271414	line1	-7	15	-1.87332
2021/07/22 20:28:42	ETH-3	490	STD	10	17149	17538.7	-120.394	-122.109	88	1.48684	0.00132215	7.10911	-1.58706	0.0024608	4.4451	0.00126072	11.8317	0.0024921	22.8651	0.0506632	-0.916425	18.312	2.66216	-9.64749	0.039895	16.0037	0.0214218	-0.262924	-0.09	0.131429	STD	0.6132	0.876124	0.832374	-3	3	0.56945	0.56945	1.03528	-0.0214829	0.568055	0.568055	-1.78	-0.192935	line2	-0.192935	-10	15
2021/07/22 21:44:36	ETH-1	490	STD	12	16314.1	16447.7	-116.044	-116.342	92	1.85089	0.00175368	6.66887	-2.0235	0.00238567	4.77091	0.00168249	11.3906	0.00241709	22.2726	0.0626243	-0.623938	23.6946	3.47742	-3.90363	0.0502075	15.5288	0.0156698	-0.63616	-0.497346	0.0988965	STD	0.2052	non ETH-3	0.850542	-3	3	0.214381	0.214381	1.03528	-0.0214829	0.200461	0.200461	-2.19	-0.1665	line2	-0.1665	-12	15
2021/07/22 22:20:33	ETH-3	490	STD	13	19704.1	20131.8	-134.378	-136.161	91	1.42405	0.00238022	6.73369	-1.95924	0.00421862	4.37322	0.00234433	11.4547	0.00427504	22.2188	0.054825	-0.8033	14.4141	2.75475	-12.6409	0.0316862	15.6086	0.0189675	-0.21176	-0.09	0.113073	STD	0.6132	0.82496	0.850542	-3	3	0.638782	0.638782	1.03528	-0.0214829	0.639833	0.639833	-1.78	0.179244	0.179244	line1	-13	15	-1.78115
2021/07/23 01:51:23	ETH-3	490	STD	19	17853.6	18107.1	-124.129	-125.37	88	1.46136	0.00254079	6.85637	-1.83762	0.0043778	4.41244	0.00250438	11.5779	0.00443666	22.4831	0.0589646	-0.788447	18.8478	3.33821	-8.60429	0.03995	15.7126	0.0198424	-0.269354	-0.09	0.119403	STD	0.6132	0.882554	0.852488	-3	3	0.583134	0.583134	1.03528	-0.0214829	0.582222	0.582222	-1.78	0.0576219	0.0576219	line1	-15	15	-1.67132
2021/07/23 03:04:42	ETH-2	490	STD	21	14617.1	14511.8	-106.166	-105.707	75	-10.5245	0.00336591	-10.641	-19.184	0.00870664	-7.42627	0.00342759	-6.01	0.00882152	-12.7037	0.0687093	-0.728609	6.20675	5.22152	26.3147	0.0124311	-14.1703	0.0251549	-0.654661	-0.515395	0.123739	STD	0.2085	non ETH-3	0.852488	-3	3	0.197827	0.197827	1.03528	-0.0214829	0.183323	0.183323	-18.69	0.493954	0.493954	line1	-15	15	-19.0177
2021/07/23 03:39:03	ETH-3	490	STD	22	15346.3	15352.3	-110.653	-110.389	77	1.43871	0.00204034	7.00683	-1.68846	0.00229695	4.39645	0.00193869	11.7289	0.00232696	22.66	0.0688185	-0.913824	32.7164	3.71806	4.61354	0.0677829	15.9061	0.0190603	-0.209222	-0.09	0.108727	STD	0.6132	0.822422	0.836072	-3	3	0.62685	0.62685	1.03528	-0.0214829	0.62748	0.62748	-1.78	-0.0915404	line2	-0.0915404	-15	15
2021/07/23 04:14:04	Merck	490	RP	23	11793.8	11146.8	-88.939	-85.171	89	-42.3052	0.00397299	-7.14176	-15.7149	0.00799579	-37.0825	0.00395998	-2.56473	0.00810251	-5.86593	0.0826402	-0.747224	-16.3897	4.99405	29.2562	-0.0381684	-41.0171	0.02731	-0.350559	-0.237731	0.145944	sample	sample	non ETH-3	0.812831	-3	3	0.462272	sample	1.03528	-0.0214829	0.441444	0.441444	sample	sample	sample	line1	-15	15	-15.5661
2021/07/23 05:23:33	ETH-3	490	STD	25	12384.7	12534.4	-92.984	-93.8595	75	1.50299	0.00192349	6.91095	-1.78352	0.00492101	4.45335	0.00191226	11.6328	0.00498485	22.6348	0.0812073	-0.748569	40.1663	3.23642	11.9883	0.084647	15.89	0.0184336	-0.19004	-0.09	0.11172	STD	0.6132	0.80324	0.779893	-3	3	0.589853	0.589853	1.03528	-0.0214829	0.589178	0.589178	-1.78	0.00351859	0.00351859	line1	-15	15	-1.63474
2021/07/23 06:41:14	ETH-3	490	STD	27	17006	16897	-119.963	-119.216	85	1.49252	0.00277886	6.93907	-1.75564	0.00546111	4.44451	0.00276193	11.661	0.00553399	22.6265	0.0589856	-0.812417	36.8638	4.32858	8.72875	0.0761797	15.9993	0.0169956	-0.100817	0.236788	0.0850844	STD	0.6132	0.714017	0.775386	-3	3	0.674569	0.674569	1.03528	-0.0214829	0.676882	0.676882	-1.78	-0.0243575	-0.0243575	line1	-15	15	-1.60686
2021/07/23 07:16:07	ETH-1	490	STD	28	19845.1	20106.2	-134.883	-135.962	86	1.83699	0.00166261	6.63856	-2.05356	0.00234404	4.75683	0.00159123	11.3601	0.00237462	21.8317	0.0601761	-0.994816	19.5454	3.00736	-7.86753	0.0416134	15.5753	0.016163	-0.546388	-0.09	0.095435	STD	0.2052	non ETH-3	0.775386	-3	2	0.228998	0.228998	1.03528	-0.0214829	0.215594	0.215594	-2.19	-0.136445	line2	-0.136445	-15	15
2021/07/23 07:54:37	ETH-2	490	STD	29	17062.1	17020.6	-120.003	-119.681	75	-10.4339	0.00315386	-10.3271	-18.8727	0.00685419	-7.33053	0.0031313	-5.69468	0.00694442	-12.075	0.0736659	-0.72635	-7.84959	4.03337	11.2441	-0.0155866	-13.7663	0.0272286	-0.656282	#DIV/0!	0.141126	STD	0.2085	non ETH-3	0.761459	-3	1	0.105176	0.105176	1.03528	-0.0214829	0.0874037	0.0874037	-18.69	0.182701	0.182701	line1	-15	15	-18.73
2021/07/23 08:29:58	ETH-3	490	STD	30	15582.3	15726.5	-112.175	-112.66	84	1.37473	0.00155112	6.93981	-1.75491	0.00149571	4.33417	0.00146606	11.6615	0.0015151	22.5979	0.0585053	-0.841318	30.0647	3.93148	2.23167	0.0618001	15.7883	0.0146035	-0.1957	#DIV/0!	0.0919117	STD	0.6132	0.8089	0.761459	-3	0	0.565759	0.565759	1.03528	-0.0214829	0.564233	0.564233	-1.78	-0.0250915	line2	-0.0250915	-15	15
[truncated: 10 more columns]

## Sheet: Samples
Date	SA/STD	Run	ID	Row	Sa m44 [mV]	Ref m44 [mV]	Sa m54 [mV]	Ref m54 [mV]	Weight [μg]	d13C [‰]	d13C SE [‰]	d18O( gas) [‰]	d18Occ [‰]	d18Occ SE [‰]	d45 [‰]	d45 SE [‰]	d46 [‰]	d46 SE [‰]	d48 [‰]	d48 SE [‰]	Δ48 [‰]	d49 [‰]	d49 SE [‰]	Δ49 [‰]	49 parameter [-]	d47 [‰]	d47 SE [‰]	Δ47 Raw [‰]	Δ47 Raw offset correction [‰]	D47 SD [‰]	Type	Accepted values	Offset correction	Average offset correction [‰]	Range offset correction before	Range offset correction after	Offset corrected all [‰]	Offset corrected STDs [‰]	ETH slope [-]	ETF intercept [-]	Final (70 degree AF) [‰]	Final AFF [‰]	Accepted d18O	Offset d18O	Offset Line 1	Offset Line 2	d18O correction range	d18O correction range	Final 18O Offset Line1 corrected [‰]
2021/06/04 22:45:09	SG-126-35	466	NW	8	18799.4	18923.3	-145.056	-145.694	95	0.422774	0.00230074	9.95339	1.23265	0.00233018	3.54696	0.00220696	14.6843	0.00236223	28.5958	0.0495832	-0.960056	42.4784	5.29756	9.22313	0.0927989	17.9959	0.0228792	-0.148979	-0.176011	0.132393	sample	sample	non ETH-3	0.802103	-3	3	0.653124	sample	1.03528	-0.0214829	0.654681	0.654681	sample	sample	line2	sample	-15	15
2021/06/04 23:17:53	SG-126-31	466	NW	9	13031.7	12871.3	-108.992	-107.864	86	0.690749	0.00173144	10.5953	1.86905	0.00253146	3.82037	0.00163955	15.3292	0.00256364	30.1854	0.0910286	-0.686765	39.9344	3.5763	5.21276	0.0863913	18.827	0.0200775	-0.238524	-0.202589	0.116954	sample	sample	non ETH-3	0.802103	-3	3	0.563579	sample	1.03528	-0.0214829	0.561977	0.561977	sample	sample	sample	line1	-15	15	2.31426
2021/06/05 02:10:02	SG-126-16	466	NW	14	13921.8	13682.8	-114.629	-113.343	90	0.575024	0.00179505	11.5863	2.85143	0.00288208	3.74638	0.0017094	16.3236	0.00291895	32.0419	0.0566788	-0.843977	46.971	4.33544	10.1489	0.0990397	19.802	0.0180526	-0.168327	-0.0368818	0.105989	sample	sample	non ETH-3	0.79618	-3	3	0.627853	sample	1.03528	-0.0214829	0.628518	0.628518	sample	sample	line2	sample	-15	15
2021/06/05 02:42:20	SG-126-30	466	NW	15	11893.6	11868	-100.808	-100.68	80	-0.402118	0.00168912	9.02662	0.313882	0.00266601	2.74184	0.00159124	13.7523	0.00269948	26.9722	0.0679971	-0.702159	46.8435	4.04187	16.1501	0.101667	16.1895	0.0233482	-0.193563	-0.0813503	0.144583	sample	sample	non ETH-3	0.79618	-3	3	0.602617	sample	1.03528	-0.0214829	0.602392	0.602392	sample	sample	sample	line1	-15	15	0.700996
2021/06/05 04:28:33	SG-126-9	466	NW	18	14808.7	14756.5	-120.119	-119.896	81	0.0444845	0.00212657	11.8867	3.14928	0.00258013	3.25972	0.0020242	16.624	0.00261379	32.8274	0.0851374	-0.67443	68.8699	4.52013	31.2118	0.144697	19.6349	0.0185027	-0.122425	-0.0411237	0.116276	sample	sample	non ETH-3	0.79618	-3	3	0.673755	sample	1.03528	-0.0214829	0.676039	0.676039	sample	sample	line2	sample	-15	15
2021/06/05 05:37:34	SG-126-39	466	NW	20	16941.6	17154.8	-133.263	-134.407	92	0.424562	0.00169052	11.4019	2.66869	0.00204739	3.59899	0.00159568	16.1383	0.00207343	31.7152	0.0765574	-0.795884	46.7577	3.14178	10.4636	0.0992787	19.5264	0.0146397	-0.107888	-0.0379959	0.0893203	sample	sample	non ETH-3	0.761953	-3	3	0.654065	sample	1.03528	-0.0214829	0.655655	0.655655	sample	sample	line2	sample	-15	15
2021/06/05 11:20:09	SG-126-17	466	NW	30	10541	10480.8	-90.976	-90.835	75	0.00285518	0.00181911	9.99333	1.27225	0.00304119	3.1549	0.00173043	14.7235	0.00307994	28.7442	0.0762485	-0.893136	38.343	5.17013	5.56262	0.0839389	17.5703	0.0239848	-0.201958	-0.113659	0.139911	sample	sample	non ETH-3	0.812507	-3	3	0.610549	sample	1.03528	-0.0214829	0.610604	0.610604	sample	sample	line2	sample	-15	15
2021/06/05 14:08:02	SG-126-22	466	NW	35	13360.2	13057.7	-110.891	-108.796	87	0.0776708	0.0016442	10.4499	1.72484	0.00292784	3.24087	0.00158551	15.1819	0.00296578	29.6757	0.0629359	-0.891291	24.7101	3.91384	-8.61097	0.0517795	18.0671	0.0221092	-0.246225	-0.16899	0.129412	sample	sample	non ETH-3	0.791453	-3	3	0.545227	sample	1.03528	-0.0214829	0.542978	0.542978	sample	sample	sample	line1	-15	15	2.27675
2021/06/05 14:44:35	SG-126-20	466	NW	36	16023.5	15987	-127.618	-127.342	95	0.358954	0.00215325	9.25598	0.541265	0.00291835	3.46292	0.00207233	13.9842	0.0029571	27.3267	0.0700676	-0.81425	24.1531	4.2228	-7.0833	0.050847	17.1986	0.023645	-0.167481	-0.101263	0.132267	sample	sample	non ETH-3	0.791453	-3	3	0.623972	sample	1.03528	-0.0214829	0.624501	0.624501	sample	sample	line2	sample	-15	15
2021/06/05 15:53:38	SG-126-38	466	NW	38	12680.9	12493.9	-106.453	-104.701	85	0.90609	0.00202617	11.2738	2.54162	0.00190466	4.04572	0.00192255	16.0106	0.00192989	31.4303	0.0899615	-0.820737	29.5361	4.08	-6.3871	0.0623126	19.7402	0.0236212	-0.233819	-0.142202	0.140038	sample	sample	non ETH-3	0.867653	-3	3	0.633834	sample	1.03528	-0.0214829	0.63471	0.63471	sample	sample	line2	sample	-15	15
2021/06/05 17:39:29	SG-126-40	466	NW	41	13118.8	13141	-108.889	-108.944	93	-0.106861	0.00155102	9.34917	0.633646	0.00182068	3.0297	0.0014607	14.0767	0.0018437	27.624	0.0739594	-0.707532	39.6963	4.56631	8.26979	0.0832961	16.7886	0.0221516	-0.214827	-0.0765406	0.134826	sample	sample	non ETH-3	0.828403	-3	3	0.613576	sample	1.03528	-0.0214829	0.613738	0.613738	sample	sample	sample	line1	-15	15	1.29371
2021/06/05 18:12:31	SG-126-27	466	NW	42	10904.8	10883.4	-93.218	-93.519	78	0.823144	0.00171463	8.98255	0.270194	0.00313623	3.88836	0.00161908	13.7107	0.00317563	26.7215	0.0681322	-0.863936	34.8173	5.06433	3.3347	0.0752485	17.3159	0.0191798	-0.224274	-0.112154	0.122651	sample	sample	non ETH-3	0.828403	-3	3	0.604129	sample	1.03528	-0.0214829	0.603958	0.603958	sample	sample	line2	sample	-15	15
2021/06/08 20:27:35	SG-127-13	468	NW	6	12700.3	12719	-105.463	-105.844	79	-0.635301	0.00188973	10.2938	1.57014	0.00256041	2.5674	0.00178117	15.0238	0.00259271	29.7139	0.0836065	-0.5429	77.5331	4.97102	43.5607	0.16719	17.2673	0.0217578	-0.186209	-0.0793456	0.135374	sample	sample	non ETH-3	0.815352	-3	3	0.629143	sample	1.03528	-0.0214829	0.629854	0.629854	sample	sample	line2	sample	-15	15
2021/06/08 21:20:25	SG-127-22	468	NW	8	19072.4	19271.4	-145.331	-145.79	98	0.467995	0.00174448	9.02105	0.308365	0.00245311	3.55693	0.00167949	13.7486	0.00248556	26.605	0.066044	-1.05204	18.1674	2.57664	-12.5337	0.0402246	17.0401	0.0188057	-0.191574	-0.09	0.109464	sample	sample	non ETH-3	0.815352	-3	3	0.623778	sample	1.03528	-0.0214829	0.624299	0.624299	sample	sample	line2	sample	-15	15
2021/06/08 21:52:50	SG-127-26	468	NW	9	11402.8	11083.5	-96.16	-94.527	94	0.342303	0.00191295	10.7684	2.04066	0.00288512	3.4999	0.00183731	15.5022	0.00292281	30.3797	0.089624	-0.838883	46.9506	4.0833	12.0002	0.103587	18.6741	0.0220697	-0.2267	-0.119066	0.134377	sample	sample	non ETH-3	0.821642	-6	6	0.594942	sample	1.03528	-0.0214829	0.594446	0.594446	sample	sample	sample	line1	-15	15	2.66624
2021/06/08 23:01:06	SG-127-15	468	NW	11	11736.7	11378.1	-99.215	-96.894	80	-0.573804	0.00237891	9.40017	0.684208	0.00320702	2.59396	0.00231	14.1269	0.00325057	27.6764	0.0874816	-0.755555	61.9304	5.56182	30.2076	0.134863	16.3875	0.0254042	-0.209754	-0.09	0.142954	sample	sample	non ETH-3	0.827932	-3	3	0.618178	sample	1.03528	-0.0214829	0.618502	0.618502	sample	sample	sample	line1	-15	15	1.27258
2021/06/09 00:40:28	SG-127-14	468	NW	14	13215.8	12966.1	-109.052	-107.626	80	-0.744281	0.00215066	9.39661	0.680685	0.00307094	2.4341	0.00207727	14.123	0.00311178	27.5592	0.0641098	-0.861758	41.1548	4.18088	10.2325	0.0881179	16.2237	0.0203648	-0.202618	-0.09	0.120955	sample	sample	non ETH-3	0.828545	-3	3	0.625927	sample	1.03528	-0.0214829	0.626525	0.626525	sample	sample	line2	sample	-15	15
2021/06/09 01:13:39	SG-127-7	468	NW	15	14617.3	14790.6	-118.333	-119.409	82	-0.0109559	0.00194643	10.5386	1.81284	0.00214388	3.16091	0.00182539	15.2708	0.00217063	29.9518	0.0632369	-0.798391	46.2603	4.00234	12.1507	0.0979392	18.1287	0.0191441	-0.189608	-0.085255	0.11439	sample	sample	non ETH-3	0.828545	-3	3	0.638937	sample	1.03528	-0.0214829	0.639994	0.639994	sample	sample	sample	line1	-15	15	2.43141
2021/06/09 02:24:20	SG-127-9	468	NW	17	13457.9	13195.6	-110.76	-108.725	94	0.218643	0.0017093	10.1031	1.38109	0.00334548	3.3609	0.00165609	14.8342	0.00338878	29.076	0.0654047	-0.788754	49.321	4.92295	15.7536	0.104053	17.9196	0.0235811	-0.177823	-0.09	0.138634	sample	sample	non ETH-3	0.829158	-3	3	0.651335	sample	1.03528	-0.0214829	0.652829	0.652829	sample	sample	sample	line1	-15	15	1.71819
2021/06/09 02:56:53	SG-127-18	468	NW	18	14682.1	14709.8	-119.035	-119.023	98	0.618203	0.00156201	10.8679	2.13924	0.00180802	3.76187	0.00147595	15.6026	0.00183115	30.7304	0.0589275	-0.696359	45.0741	3.8794	9.70944	0.0948612	19.0927	0.0181229	-0.182435	-0.105007	0.110411	sample	sample	non ETH-3	0.829158	-3	3	0.646724	sample	1.03528	-0.0214829	0.648055	0.648055	sample	sample	line2	sample	-15	15
2021/06/09 04:02:21	SG-127-12	468	NW	20	14249.7	14059.1	-115.466	-114.906	97	-0.0788247	0.00192425	9.14766	0.433885	0.00263357	3.04897	0.00184981	13.8745	0.0026684	27.1523	0.0788091	-0.7678	50.2662	5.18198	18.8979	0.105068	16.6788	0.0231864	-0.146637	-0.09	0.137593	sample	sample	non ETH-3	0.827878	-3	3	0.681241	sample	1.03528	-0.0214829	0.68379	0.68379	sample	sample	line2	sample	-15	15
2021/06/09 05:45:54	SG-127-17	468	NW	23	14074.4	13920.7	-114.87	-113.711	85	0.100604	0.00188864	10.9063	2.17729	0.00301812	3.27822	0.00183565	15.64	0.00305817	30.5633	0.0633881	-0.931975	38.2346	4.94246	3.54339	0.0802868	18.6182	0.019154	-0.187113	-0.09	0.109457	sample	sample	non ETH-3	0.807308	-3	3	0.620195	sample	1.03528	-0.0214829	0.62059	0.62059	sample	sample	sample	line1	-15	15	2.51438
2021/06/09 06:18:42	SG-127-8	468	NW	24	12529.3	12234	-104.57	-102.522	79	-0.0493246	0.00192436	9.86948	1.14947	0.00343678	3.1017	0.00188163	14.5991	0.0034822	28.5905	0.0852154	-0.797319	38.1998	5.48662	5.72218	0.0803106	17.3966	0.0228761	-0.19736	-0.0469735	0.136418	sample	sample	non ETH-3	0.807308	-3	3	0.609948	sample	1.03528	-0.0214829	0.609982	0.609982	sample	sample	line2	sample	-15	15
2021/06/09 08:04:18	SG-127-21	468	NW	27	13755.5	13588.9	-112.786	-111.501	89	0.0393607	0.00155243	9.00095	0.288442	0.00295248	3.15461	0.00149252	13.7275	0.0029904	26.7999	0.0699347	-0.820835	35.6594	3.85366	4.90102	0.0753858	16.5651	0.0233584	-0.224518	-0.0186782	0.132387	sample	sample	non ETH-3	0.786738	-3	3	0.56222	sample	1.03528	-0.0214829	0.56057	0.56057	sample	sample	sample	line1	-15	15	0.625537
2021/06/09 09:09:16	SG-127-23	468	NW	29	11316.1	11085.9	-95.81	-94.378	76	0.57497	0.00249291	9.21437	0.500015	0.00324637	3.66388	0.00240302	13.9429	0.00328988	27.2676	0.104085	-0.790295	48.1679	5.16575	16.0634	0.104733	17.3414	0.0222381	-0.193653	-0.09	0.130007	sample	sample	non ETH-3	0.683814	-3	3	0.49016	sample	1.03528	-0.0214829	0.485969	0.485969	sample	sample	sample	line1	-15	15	0.828801
2021/06/09 09:43:39	SG-127-11	468	NW	30	17144.7	17239.6	-133.69	-134.275	100	-0.176553	0.00184617	8.90283	0.191161	0.00235872	2.94889	0.00178252	13.6286	0.00239056	26.5114	0.0591496	-0.906571	30.1305	3.98789	-0.0534473	0.0647743	16.4058	0.0227589	-0.0736571	-0.0108652	0.131324	sample	sample	non ETH-3	0.683814	-3	3	0.610157	sample	1.03528	-0.0214829	0.610198	0.610198	sample	sample	line2	sample	-15	15
2021/06/09 10:55:39	SG-127-24	468	NW	32	17240.4	17279.6	-134.101	-134.012	98	0.683932	0.00194949	9.5909	0.873298	0.00268142	3.77906	0.00186786	14.321	0.00271658	28.2063	0.0467901	-0.62286	33.4882	2.8849	0.977721	0.0721034	17.9597	0.0180303	-0.071069	-0.09	0.106667	sample	sample	non ETH-3	0.679412	-3	3	0.608343	sample	1.03528	-0.0214829	0.608321	0.608321	sample	sample	line2	sample	-15	15
2021/06/09 11:28:30	SG-127-27	468	NW	33	15378.2	15254.7	-122.712	-121.934	95	0.0169881	0.0017652	10.6345	1.90788	0.00241162	3.19043	0.00170647	15.3671	0.00244395	30.3054	0.0551178	-0.644968	34.6477	3.73976	0.698535	0.0736881	18.3884	0.0182539	-0.0582382	-0.0456693	0.106424	sample	sample	non ETH-3	0.679412	-3	3	0.621174	sample	1.03528	-0.0214829	0.621604	0.621604	sample	sample	sample	line1	-15	15	2.26682
2021/06/09 13:12:42	SG-127-19	468	NW	36	14801.6	14618.1	-118.844	-118.014	90	0.716072	0.00233451	10.7203	1.99298	0.00286516	3.84844	0.00225471	15.4547	0.00290413	30.551	0.0613599	-0.579294	62.8603	5.10714	27.0924	0.133867	19.1443	0.022687	-0.0776476	0.00528232	0.128368	sample	sample	non ETH-3	0.675011	-3	3	0.597363	sample	1.03528	-0.0214829	0.596953	0.596953	sample	sample	line2	sample	-15	15
2021/06/09 14:18:20	SG-127-10	468	NW	38	15810.7	15591.4	-125.654	-124.224	96	0.00434211	0.0021632	11.0919	2.36135	0.00410619	3.19448	0.0021472	15.8262	0.00416117	31.1603	0.0827322	-0.719612	60.9996	3.3539	25.2699	0.131002	18.7134	0.0178368	-0.187652	-0.09	0.110224	sample	sample	non ETH-3	0.768588	-6	6	0.580936	sample	1.03528	-0.0214829	0.579946	0.579946	sample	sample	line2	sample	-15	15
2021/06/09 16:36:18	SG-127-16	468	NW	42	18949.1	18929.8	-144.276	-143.897	96	0.336723	0.00209667	9.46593	0.749401	0.00219846	3.44939	0.0020062	14.1949	0.00222821	27.6017	0.0577291	-0.961949	16.5798	3.29358	-14.8134	0.0376772	17.4175	0.0196753	-0.142682	0.104575	0.111864	sample	sample	non ETH-3	0.862166	-3	3	0.719483	sample	1.03528	-0.0214829	0.723381	0.723381	sample	sample	line2	sample	-15	15
2021/06/14 20:30:35	SG-126-10	471	NW	6	16419.7	16495.5	-128.145	-128.619	89	-0.133348	0.00250317	10.5258	1.80017	0.00278526	3.04579	0.00240743	15.2577	0.00282329	29.764	0.054382	-0.954886	70.8978	6.13181	36.137	0.16589	18.0306	0.0247123	-0.154867	0.0341385	0.140532	sample	sample	non ETH-3	0.892908	-3	3	0.738041	sample	1.03528	-0.0214829	0.742593	0.742593	sample	sample	line2	sample	-15	15
2021/06/14 22:08:50	SG-126-15	471	NW	9	16200.3	16026.5	-126.498	-125.639	89	0.492067	0.0022125	11.2108	2.47916	0.0024858	3.6556	0.00212216	15.9465	0.00251937	31.0921	0.0562482	-1.02231	33.2427	3.11381	-2.27312	0.0768502	19.299	0.0226193	-0.203534	-0.0356563	0.12962	sample	sample	non ETH-3	0.876009	-3	3	0.672474	sample	1.03528	-0.0214829	0.674714	0.674714	sample	sample	sample	line1	-15	15	2.51619
2021/06/14 23:19:35	SG-127-30	471	NW	11	16343	16306.4	-127.136	-127.457	86	0.0692606	0.00252368	9.54611	0.828886	0.0024174	3.20157	0.00241456	14.2748	0.00245062	27.6163	0.0681139	-1.1052	43.7204	4.62854	11.5986	0.0993712	17.1731	0.0233207	-0.205479	-0.0600608	0.129769	sample	sample	non ETH-3	0.842319	-3	3	0.63684	sample	1.03528	-0.0214829	0.637823	0.637823	sample	sample	sample	line1	-15	15	0.865018
2021/06/15 01:00:12	SG-126-34	471	NW	14	20161	20357.2	-149.247	-150.536	97	0.187112	0.00131706	9.21466	0.500301	0.00209261	3.30048	0.0012608	13.9423	0.00211965	27.1584	0.0687279	-0.895435	18.6721	1.79065	-12.1459	0.0436367	16.9263	0.0143766	-0.227643	-0.112114	0.0837898	sample	sample	non ETH-3	0.816383	-3	3	0.58874	sample	1.03528	-0.0214829	0.588025	0.588025	sample	sample	line2	sample	-15	15
2021/06/15 01:33:23	SG-127-29	471	NW	15	15942.6	15914.7	-124.654	-125.028	90	0.0505988	0.00192924	10.7091	1.98181	0.00266523	3.22451	0.001866	15.442	0.00270095	30.2001	0.0570444	-0.89454	35.0795	2.70991	0.934948	0.079407	18.3361	0.018132	-0.217156	-0.106319	0.105476	sample	sample	non ETH-3	0.816383	-3	3	0.599228	sample	1.03528	-0.0214829	0.598883	0.598883	sample	sample	sample	line1	-15	15	2.01794
2021/06/15 02:42:42	SG-126-36	471	NW	17	18535.3	18486.4	-140.78	-139.514	95	-0.168078	0.00204404	10.6997	1.97252	0.00247424	3.01929	0.00197287	15.4322	0.00250791	29.8812	0.0712819	-1.18442	4.01098	2.42836	-28.8785	0.00990919	18.1428	0.0193758	-0.186355	-0.0731763	0.114102	sample	sample	non ETH-3	0.819897	-3	3	0.633541	sample	1.03528	-0.0214829	0.634407	0.634407	sample	sample	sample	line1	-15	15	2.00865
2021/06/15 03:15:42	SG-126-12	471	NW	18	13100.3	12897.6	-106.788	-105.559	80	-0.323913	0.00153616	10.3022	1.57844	0.00217489	2.85946	0.00144605	15.0328	0.00220222	29.2639	0.0624635	-0.997497	35.0403	4.0475	2.0788	0.0796458	17.5923	0.0240346	-0.176058	-0.0558431	0.144998	sample	sample	non ETH-3	0.819897	-3	3	0.643839	sample	1.03528	-0.0214829	0.645069	0.645069	sample	sample	line2	sample	-15	15
2021/06/15 04:21:48	SG-126-17	471	NW	20	16165.8	16215.5	-126.132	-126.745	93	0.592677	0.00153398	11.3955	2.66229	0.00195318	3.75629	0.00145141	16.1321	0.00197814	31.5435	0.073447	-0.950055	37.6479	3.99702	1.51411	0.0842687	19.6395	0.0149431	-0.152658	-0.0323086	0.0910885	sample	sample	non ETH-3	0.8201	-3	3	0.667441	sample	1.03528	-0.0214829	0.669503	0.669503	sample	sample	line2	sample	-15	15
2021/06/15 06:05:17	SG-126-16	471	NW	23	17560	17417.5	-134.721	-134.01	92	0.695902	0.00178354	11.8198	3.08295	0.00228459	3.86776	0.00169283	16.5583	0.00231402	32.3282	0.0603694	-1.02811	25.7257	3.64056	-10.9253	0.0578688	20.1982	0.018523	-0.13165	-0.0283173	0.11118	sample	sample	non ETH-3	0.804924	-3	3	0.673274	sample	1.03528	-0.0214829	0.675542	0.675542	sample	sample	sample	line1	-15	15	3.10873
2021/06/15 07:50:18	SG-126-21	471	NW	26	17085.2	17228.2	-131.804	-132.613	90	0.849046	0.00162192	9.46644	0.749908	0.00272919	3.92945	0.0015697	14.1964	0.00276494	27.6754	0.0576981	-0.893452	35.203	3.9682	2.72038	0.0781339	17.9085	0.017925	-0.155213	-0.039619	0.0993765	sample	sample	non ETH-3	0.800099	-3	3	0.644887	sample	1.03528	-0.0214829	0.646153	0.646153	sample	sample	line2	sample	-15	15
2021/06/15 08:24:52	SG-126-27	471	NW	27	18030.3	17920.3	-137.193	-136.813	92	1.06633	0.00202987	9.55794	0.840622	0.00242562	4.13622	0.00193958	14.2887	0.00245769	27.6343	0.0577118	-1.11525	30.0163	3.49486	-2.70093	0.0670874	18.2055	0.0192271	-0.165429	-0.0311409	0.108067	sample	sample	non ETH-3	0.800099	-3	3	0.63467	sample	1.03528	-0.0214829	0.635576	0.635576	sample	sample	sample	line1	-15	15	0.851381
2021/06/15 10:03:28	SG-126-24	471	NW	30	16351.9	16277.1	-127.179	-127.262	84	1.00092	0.00171582	10.7679	2.04012	0.0024742	4.11699	0.00165398	15.5031	0.00250692	30.3055	0.063504	-0.912441	38.621	3.74193	3.28943	0.0854495	19.4209	0.0234736	-0.128967	-0.0864724	0.13507	sample	sample	non ETH-3	0.80025	-6	6	0.671282	sample	1.03528	-0.0214829	0.67348	0.67348	sample	sample	line2	sample	-15	15
2021/06/15 10:57:33	SG-126-30	471	NW	32	18685.7	18746.3	-141.375	-141.466	96	0.561151	0.0021448	11.497	2.7629	0.00230889	3.73028	0.00205519	16.2339	0.00234018	31.8541	0.0574712	-0.849488	27.1247	2.93549	-8.81053	0.0612114	19.8459	0.0181039	-0.0220074	-0.09	0.103936	sample	sample	non ETH-3	0.80025	-6	6	0.778242	sample	1.03528	-0.0214829	0.784213	0.784213	sample	sample	line2	sample	-15	15
2021/06/15 14:28:08	SG-126-14	471	NW	36	15678	15784.3	-123.413	-123.855	80	0.298002	0.0021988	9.8971	1.17685	0.00210486	3.4281	0.00208619	14.6275	0.00213267	28.6241	0.055625	-0.82071	68.288	4.50202	34.4542	0.155195	17.8183	0.0183485	-0.146278	-0.0188339	0.11051	sample	sample	non ETH-3	0.8004	-3	3	0.654123	sample	1.03528	-0.0214829	0.655715	0.655715	sample	sample	line2	sample	-15	15
2021/06/15 15:34:37	SG-126-41	471	NW	38	13322.9	13080.6	-108.164	-106.638	81	0.904506	0.00218749	9.73596	1.0171	0.00269769	3.99078	0.00209406	14.4671	0.00273343	28.1843	0.0621285	-0.931983	55.9675	4.37574	22.2305	0.128473	18.2273	0.0220946	-0.167353	-0.09	0.130659	sample	sample	non ETH-3	0.792612	-3	3	0.625259	sample	1.03528	-0.0214829	0.625833	0.625833	sample	sample	line2	sample	-15	15
2021/06/15 16:09:00	SG-126-18	471	NW	39	16030.6	16242.3	-125.311	-126.538	91	0.156867	0.00152536	10.3213	1.59735	0.00193059	3.3106	0.00144437	15.053	0.00195532	29.5381	0.0616139	-0.771086	59.826	3.27977	25.5436	0.135413	18.1192	0.0226791	-0.141944	-0.0764611	0.138828	sample	sample	non ETH-3	0.792612	-3	3	0.650668	sample	1.03528	-0.0214829	0.652138	0.652138	sample	sample	sample	line1	-15	15	1.6048
2021/06/15 17:18:29	SG-126-31	471	NW	41	13467.3	13234.8	-108.909	-107.953	80	0.807438	0.00195218	11.1445	2.41349	0.00245628	3.94879	0.00184929	15.8807	0.00248779	31.1482	0.0764552	-0.838519	62.1423	5.18259	25.4442	0.142019	19.6145	0.0205692	-0.131743	-0.09	0.124088	sample	sample	non ETH-3	0.784391	-3	3	0.652648	sample	1.03528	-0.0214829	0.654188	0.654188	sample	sample	sample	line1	-15	15	2.42095
2021/06/15 17:52:16	SG-126-28	471	NW	42	15466.9	15554.7	-122.296	-122.405	88	0.563084	0.00206914	9.26182	0.547053	0.00231671	3.65439	0.00196841	13.9905	0.00234712	27.2593	0.073259	-0.892181	51.4814	3.82106	19.1923	0.115884	17.4325	0.0200313	-0.140543	0.0438926	0.122273	sample	sample	non ETH-3	0.784391	-3	3	0.643847	sample	1.03528	-0.0214829	0.645077	0.645077	sample	sample	line2	sample	-15	15
2021-06-25 17:40:46	SG-127-6	478	NW	5	13662.4	13776.9	-108.429	-109.167	85	0.729952	0.00198435	11.7886	3.05203	0.00239835	3.89858	0.00188704	16.527	0.00242956	32.6266	0.0665906	-0.677975	68.5258	4.52073	30.3739	0.152705	20.1966	0.0187574	-0.134666	-31.9225	0.104111	sample	sample	non ETH-3	0.699103	-4	3	0.564438	sample	1.03528	-0.0214829	0.562866	0.562866	sample	sample	sample	line1	-15	15	2.93252
2021-06-25 18:16:10	SG-127-11	478	NW	6	9865.27	9675.64	-82.423	-81.264	84	0.0509418	0.0020334	9.5089	0.791997	0.00249404	3.18311	0.00192472	14.2374	0.00252601	27.7843	0.0739919	-0.868202	53.9567	4.65076	21.614	0.130809	17.1185	0.0237484	-0.203944	-63.0214	0.147425	sample	sample	non ETH-3	0.699103	-5	3	0.495159	sample	1.03528	-0.0214829	0.491144	0.491144	sample	sample	line2	sample	-15	15
2021-06-25 19:23:34	SG-127-8	478	NW	8	17281.5	17196.8	-129.655	-129.964	97	0.169093	0.00210404	9.73714	1.01827	0.00329057	3.30175	0.0020569	14.4667	0.00333483	28.4454	0.0666606	-0.677592	61.1599	4.65997	28.0094	0.136269	17.5178	0.0241421	-0.155753	-62.6877	0.134137	sample	sample	non ETH-3	0.801476	-3	3	0.645722	sample	1.03528	-0.0214829	0.647018	0.647018	sample	sample	line2	sample	-15	15
2021-06-25 23:14:13	SG-127-7	478	NW	15	15472.7	15467.6	-118.991	-119.431	89	0.26432	0.00195888	11.2114	2.47984	0.00265551	3.44223	0.00187611	15.9467	0.00269035	31.2844	0.0598737	-0.836423	34.7954	3.64573	-0.547752	0.0767702	19.0893	0.0239139	-0.190171	0.00795524	0.141651	sample	sample	non ETH-3	0.85665	-3	3	0.666479	sample	1.03528	-0.0214829	0.668507	0.668507	sample	sample	sample	line1	-15	15	2.39132
2021-06-26 00:27:04	SG-127-20	478	NW	17	16286.6	16347.1	-124.176	-124.585	83	0.371137	0.00160215	9.98375	1.26275	0.00219762	3.49964	0.00151921	14.7147	0.00222574	28.7806	0.0550303	-0.840337	34.883	3.32907	1.86213	0.0768807	17.9257	0.0235517	-0.198746	-0.09	0.138802	sample	sample	non ETH-3	0.811414	-3	3	0.612668	sample	1.03528	-0.0214829	0.612797	0.612797	sample	sample	sample	line1	-15	15	1.15566
2021-06-26 01:00:34	SG-127-12	478	NW	18	19916.4	20189.2	-145.048	-146.225	98	0.0996379	0.00236371	9.5505	0.833239	0.00389477	3.23019	0.00231237	14.2792	0.00394684	28.0149	0.0551794	-0.726577	27.9849	2.3507	-3.69126	0.0632305	17.251	0.0163894	-0.16266	-0.0654405	0.10395	sample	sample	non ETH-3	0.811414	-3	3	0.648754	sample	1.03528	-0.0214829	0.650157	0.650157	sample	sample	line2	sample	-15	15
2021-06-26 02:09:06	SG-127-21	478	NW	20	19379.5	19814.3	-142.324	-144.037	94	0.324581	0.00178729	9.54125	0.824075	0.00277548	3.44063	0.00172545	14.2704	0.00281198	27.7647	0.0717299	-0.952421	24.3706	2.42944	-7.39906	0.054926	17.461	0.0157791	-0.164166	-0.09	0.0895393	sample	sample	non ETH-3	0.795346	-3	3	0.63118	sample	1.03528	-0.0214829	0.631963	0.631963	sample	sample	line2	sample	-15	15
2021-06-26 03:55:41	SG-127-10	478	NW	23	17653.2	17647.9	-132.551	-132.204	90	-0.0603034	0.00175918	11.0621	2.33181	0.00272455	3.13287	0.00171089	15.7962	0.00276089	30.8935	0.0646659	-0.919081	28.3074	3.30813	-6.19826	0.0625951	18.6439	0.0187754	-0.16345	-0.09	0.106953	sample	sample	non ETH-3	0.780857	-3	3	0.617407	sample	1.03528	-0.0214829	0.617704	0.617704	sample	sample	sample	line1	-15	15	2.19501
2021-06-26 04:28:48	SG-127-14	478	NW	24	18934	18985.3	-140.104	-139.528	91	-0.542312	0.00201591	9.79402	1.07466	0.00283015	2.63716	0.00195766	14.5223	0.00286834	28.3315	0.0572618	-0.897718	16.6388	2.42769	-14.5306	0.0377985	16.8457	0.0181708	-0.186692	-0.124507	0.101553	sample	sample	non ETH-3	0.780857	-3	3	0.594165	sample	1.03528	-0.0214829	0.593641	0.593641	sample	sample	line2	sample	-15	15
2021-06-26 05:42:07	SG-127-24	478	NW	26	18105	18211.6	-135.451	-135.088	93	0.821814	0.00158906	9.94276	1.22212	0.00234801	3.92049	0.00153564	14.6745	0.00237914	28.7051	0.0534646	-0.834557	22.3156	3.22736	-10.6697	0.0501086	18.3968	0.0157926	-0.129658	-0.09	0.0889496	sample	sample	non ETH-3	0.803269	-3	3	0.673612	sample	1.03528	-0.0214829	0.675891	0.675891	sample	sample	line2	sample	-15	15
2021-06-26 06:16:57	SG-127-28	478	NW	27	20003.1	20460.9	-145.668	-147.599	94	0.230878	0.00145451	9.57139	0.853952	0.00241175	3.35388	0.00139128	14.3005	0.00244277	27.7962	0.053051	-0.980992	15.4863	1.75107	-15.9743	0.0351542	17.4043	0.0173484	-0.159769	-0.117314	0.107133	sample	sample	non ETH-3	0.803269	-3	3	0.6435	sample	1.03528	-0.0214829	0.644717	0.644717	sample	sample	sample	line1	-15	15	0.735733
2021-06-26 07:25:35	SG-127-17	478	NW	29	17797.4	17918.1	-133.682	-133.711	88	0.342925	0.00173034	11.5076	2.77339	0.00222909	3.52617	0.00166083	16.2441	0.00225867	31.914	0.0577609	-0.811469	27.945	2.299	-7.82324	0.0618645	19.5237	0.0199242	-0.138049	-0.09	0.114653	sample	sample	non ETH-3	0.822634	-3	3	0.684585	sample	1.03528	-0.0214829	0.687251	0.687251	sample	sample	sample	line1	-15	15	2.6667
2021-06-26 07:58:40	SG-127-9	478	NW	30	18742.7	19262.8	-138.651	-141.411	95	0.411398	0.00127095	10.6491	1.92232	0.00288817	3.56049	0.00124388	15.3826	0.00292551	30.1886	0.0551391	-0.788628	20.081	2.1065	-13.8072	0.0449841	18.7106	0.0123432	-0.137373	-0.0867569	0.0791548	sample	sample	non ETH-3	0.822634	-3	3	0.685261	sample	1.03528	-0.0214829	0.687951	0.687951	sample	sample	line2	sample	-15	15
2021-06-26 09:13:27	SG-127-27	478	NW	32	17639.8	17693.4	-132.468	-132.358	88	0.174293	0.00202269	11.0944	2.3638	0.00234326	3.35381	0.00194469	15.829	0.00237499	31.0007	0.0687461	-0.879866	27.5588	2.79717	-7.21796	0.0610168	18.9259	0.0177563	-0.145751	-0.09	0.106206	sample	sample	non ETH-3	0.803995	-3	3	0.658245	sample	1.03528	-0.0214829	0.659982	0.659982	sample	sample	line2	sample	-15	15
2021-06-26 09:49:34	SG-127-15	478	NW	33	17048.5	17185.7	-129.248	-129.659	96	-0.304304	0.00156273	9.91551	1.1951	0.00271199	2.86439	0.00148118	14.6448	0.00274629	28.5685	0.0714651	-0.908678	23.1936	3.01011	-8.65131	0.0512277	17.2466	0.0177007	-0.144985	-0.0914145	0.108407	sample	sample	non ETH-3	0.803995	-3	3	0.659011	sample	1.03528	-0.0214829	0.660775	0.660775	sample	sample	sample	line1	-15	15	1.08358
2021-06-26 10:57:56	SG-127-19	478	NW	35	13722.2	13909.2	-108.479	-109.716	83	0.722783	0.00164775	10.8073	2.0792	0.00217829	3.85775	0.00157899	15.5421	0.00220698	30.4	0.0700446	-0.897525	40.8436	3.54169	5.63745	0.0899978	19.1774	0.0228749	-0.139209	-0.09	0.13884	sample	sample	non ETH-3	0.805536	-3	3	0.666328	sample	1.03528	-0.0214829	0.66835	0.66835	sample	sample	sample	line1	-15	15	1.97012
2021-06-26 11:36:07	SG-127-25	478	NW	36	16869.6	16792.5	-127.743	-127.177	83	0.81413	0.00213312	10.6799	1.95292	0.00311128	3.93891	0.00207073	15.4144	0.00315298	30.1169	0.0596835	-0.920813	39.6253	3.92464	4.6215	0.0875046	19.1399	0.0178846	-0.135806	-0.0736283	0.0964076	sample	sample	non ETH-3	0.805536	-3	3	0.66973	sample	1.03528	-0.0214829	0.671873	0.671873	sample	sample	line2	sample	-15	15
2021-06-26 12:44:12	SG-127-22	478	NW	38	20617.1	21215	-149.274	-151.385	96	0.640623	0.00159984	9.52227	0.805261	0.00203368	3.7361	0.0015366	14.252	0.00206076	27.8157	0.0536202	-0.866623	16.0405	2.01285	-15.7444	0.0368879	17.7378	0.0179725	-0.178116	-0.09	0.101771	sample	sample	non ETH-3	0.786611	-3	3	0.608495	sample	1.03528	-0.0214829	0.608477	0.608477	sample	sample	line2	sample	-15	15
2021-06-26 13:17:43	SG-127-26	478	NW	39	17547.8	17629.2	-131.988	-132.112	91	0.623245	0.00168783	11.2885	2.55624	0.00137532	3.78121	0.00158761	16.0248	0.00139287	31.556	0.0536384	-0.726948	24.5591	3.04865	-10.9397	0.054725	19.5753	0.0209295	-0.137453	-0.0629961	0.125595	sample	sample	non ETH-3	0.787071	-3	3	0.649618	sample	1.03528	-0.0214829	0.651051	0.651051	sample	sample	sample	line1	-15	15	2.43399
2021-06-26 14:31:12	SG-127-18	478	NW	41	18568.3	18662.4	-137.294	-137.725	92	0.854168	0.00246197	11.3161	2.58361	0.00479827	3.99854	0.00242853	16.053	0.00486177	31.4417	0.0593112	-0.893146	31.9004	3.33101	-4.13777	0.0721535	19.8312	0.02159	-0.137139	-0.09	0.113024	sample	sample	non ETH-3	0.778373	-3	3	0.641234	sample	1.03528	-0.0214829	0.642371	0.642371	sample	sample	sample	line1	-15	15	2.46492
2021-07-01 07:32:04	SG-126-34	481	NW	8	17903.3	18334.5	0	0	91	0.436785	0.00152897	0	0.997612	0.00192972	3.55264	0.00143592	14.4876	0.00195389	28.3527	0.0639565	-0.808708	100.862	4.37174	66.1466	0.137682	17.8121	0.0220508	-0.144034	0	0.132297	sample	sample	non ETH-3	0.817225	-3	3	0.673192	sample	1.03528	-0.0214829	0.675456	0.675456	sample	sample	line2	sample	-15	15
2021-07-01 07:32:04	SG-126-39	481	NW	9	14374	14685.9	0	0	92	0.333323	0.00166876	0	2.42536	0.00206256	3.50556	0.00159865	15.9329	0.00208996	25.3628	0.0917205	-6.54655	94.8341	3.83001	57.3995	0.136114	19.1606	0.0170483	-0.171164	0	0.0989382	sample	sample	non ETH-3	0.817225	-3	3	0.646061	sample	1.03528	-0.0214829	0.647369	0.647369	sample	sample	sample	line1	-15	15	2.36575
2021-07-01 07:32:04	SG-126-32	481	NW	14	18643.6	19207.9	0	0	90	0.839495	0.0013485	0	1.82512	0.00185087	3.95885	0.0012827	15.3263	0.00187475	30.0618	0.0536591	-0.800869	71.7705	3.54458	35.8414	0.0848179	19.0383	0.0205365	-0.169974	0	0.126075	sample	sample	non ETH-3	0.738409	-3	3	0.568435	sample	1.03528	-0.0214829	0.567004	0.567004	sample	sample	line2	sample	-15	15
2021-07-01 07:32:04	SG-126-38	481	NW	17	14127.7	14372.4	0	0	83	0.914679	0.00155143	0	2.59637	0.00197263	4.05621	0.0014669	16.1073	0.00199781	31.7485	0.0592517	-0.702639	89.354	5.31331	51.1374	0.130885	19.9286	0.0168765	-0.152688	0	0.106211	sample	sample	non ETH-3	0.780515	-3	3	0.627827	sample	1.03528	-0.0214829	0.628492	0.628492	sample	sample	sample	line1	-15	15	2.54096
2021-07-01 07:32:04	SG-126-25	481	NW	20	18860.6	19587.9	0	0	89	1.05523	0.0013068	0	1.68636	0.00240995	4.15613	0.00126252	15.1862	0.00244121	29.7482	0.0570965	-0.829465	53.9406	3.19767	18.6718	0.0439397	19.1131	0.0153895	-0.163712	0	0.0954873	sample	sample	non ETH-3	0.780515	-3	3	0.616803	sample	1.03528	-0.0214829	0.617078	0.617078	sample	sample	line2	sample	-15	15
2021-07-01 07:32:04	SG-126-19	481	NW	23	17577.6	18040.5	0	0	83	0.0862903	0.00120261	0	1.16913	0.00176989	3.23025	0.00113501	14.6605	0.00179225	28.688	0.0679748	-0.823533	35.6119	3.06085	2.96187	0.0288259	17.6796	0.0184727	-0.110211	0	0.114711	sample	sample	non ETH-3	0.806406	-3	3	0.696195	sample	1.03528	-0.0214829	0.699271	0.699271	sample	sample	sample	line1	-15	15	1.11607
2021-07-01 07:32:04	SG-126-29	481	NW	27	19046.9	19684.2	0	0	96	0.347449	0.00140181	0	1.76072	0.00203623	3.49559	0.00131698	15.26	0.00206171	29.7175	0.0660681	-1.00447	41.3646	4.25129	7.07929	0.0323777	18.4872	0.0201876	-0.170494	0	0.123119	sample	sample	non ETH-3	0.806013	-3	3	0.635518	sample	1.03528	-0.0214829	0.636454	0.636454	sample	sample	sample	line1	-15	15	1.70766
2021/07/09 00:22:11	SG-126-40	485	NW	18	19517.4	19876.2	-139.271	-140.704	94	0.0361019	0.00133935	9.62438	0.906485	0.00169484	3.17322	0.00126893	14.3533	0.00171658	27.8765	0.0557771	-1.00691	44.2764	2.99834	12.0147	0.112275	17.2797	0.0187755	-0.147603	-0.09	0.109409	sample	sample	non ETH-3	0.872515	-3	3	0.724912	sample	1.03528	-0.0214829	0.729001	0.729001	sample	sample	line2	sample	-15	15
2021/07/09 03:50:21	SG-126-26	485	NW	24	17011.9	17248.7	-125.119	-126.406	95	1.11168	0.00181026	9.85896	1.13903	0.0020313	4.18917	0.00172511	14.591	0.00205812	28.5733	0.0611549	-0.798107	61.0119	4.23447	26.6513	0.146847	18.5956	0.0155405	-0.129691	-0.09	0.0890398	sample	sample	non ETH-3	0.780369	-3	3	0.650678	sample	1.03528	-0.0214829	0.652148	0.652148	sample	sample	line2	sample	-15	15
2021/07/09 06:28:41	SG-126-30	485	NW	29	17099.2	17453.3	-125.523	-126.853	91	0.595209	0.00166076	11.5205	2.78625	0.00195035	3.76301	0.00156895	16.2576	0.00197526	31.8326	0.057598	-0.916945	46.1985	2.96858	9.51484	0.11081	19.7863	0.0205481	-0.13708	-0.0903203	0.126241	sample	sample	non ETH-3	0.780369	-3	3	0.643289	sample	1.03528	-0.0214829	0.644499	0.644499	sample	sample	sample	line1	-15	15	2.82519
2021/07/09 07:03:08	SG-126-35	485	NW	30	17675.3	18302.1	-128.623	-131.686	91	0.372125	0.00162391	10.1841	1.46139	0.0021229	3.50753	0.00152805	14.9158	0.0021496	29.1844	0.0605332	-0.844225	47.9981	2.62956	14.1555	0.114406	18.1894	0.0173924	-0.142678	-0.0924019	0.110959	sample	sample	non ETH-3	0.746443	-3	3	0.603765	sample	1.03528	-0.0214829	0.60358	0.60358	sample	sample	line2	sample	-15	15
2021/07/09 08:46:22	SG-126-37	485	NW	33	14294.1	14434.8	-108.753	-109.762	92	0.58276	0.00213041	9.95346	1.23272	0.00249089	3.69687	0.00204889	14.6847	0.00252461	28.929	0.0714502	-0.637191	66.2145	5.57116	32.0371	0.158085	18.2041	0.0219452	-0.0989873	-0.0254418	0.131475	sample	sample	non ETH-3	0.75633	-6	6	0.657343	sample	1.03528	-0.0214829	0.659048	0.659048	sample	sample	sample	line1	-15	15	1.21348
2021/07/09 09:37:53	SG-126-42	485	NW	35	11832.9	11803.5	-93.029	-93.0975	78	0.934907	0.00206772	10.2755	1.552	0.00287787	4.03802	0.00198166	15.0087	0.00291559	29.5478	0.0973607	-0.674505	69.4225	5.33406	34.1185	0.170922	18.795	0.0215261	-0.183298	-0.09	0.123636	sample	sample	non ETH-3	0.75633	-6	6	0.573032	sample	1.03528	-0.0214829	0.571764	0.571764	sample	sample	sample	line1	-15	15	1.53276
2021/07/09 11:07:13	SG-126-17	485	NW	38	12401	12264.9	-96.693	-95.821	89	0.596055	0.00194985	11.2973	2.565	0.00270911	3.75604	0.00186505	16.0336	0.00274446	31.4127	0.0810248	-0.883062	37.4275	2.9828	1.49226	0.0919432	19.4998	0.0203264	-0.194129	-0.113375	0.118231	sample	sample	non ETH-3	0.766217	-3	3	0.572088	sample	1.03528	-0.0214829	0.570786	0.570786	sample	sample	line2	sample	-15	15
2021/07/09 11:39:14	SG-127-13	485	NW	39	11223.7	11283.6	-88.8	-89.429	80	-0.525373	0.00161679	10.5775	1.85135	0.00204201	2.68026	0.00151083	15.3087	0.00206721	30.1094	0.0807647	-0.720127	49.6251	3.68325	15.8503	0.126402	17.6862	0.0215608	-0.166573	-0.09	0.133521	sample	sample	non ETH-3	0.766217	-3	3	0.599644	sample	1.03528	-0.0214829	0.599314	0.599314	sample	sample	sample	line1	-15	15	1.83211
2021/07/09 12:51:41	SG-126-28	485	NW	41	13736.2	13792.1	-104.856	-105.819	89	0.688453	0.00169424	9.182	0.467926	0.00195036	3.76909	0.00159246	13.9106	0.00197487	27.3287	0.0713081	-0.667258	43.9552	4.31561	11.9309	0.105841	17.4829	0.0215049	-0.131449	-0.0772237	0.136683	sample	sample	non ETH-3	0.74539	-3	3	0.613942	sample	1.03528	-0.0214829	0.614116	0.614116	sample	sample	sample	line1	-15	15	0.418163
2021/07/09 13:25:40	SG-126-21	485	NW	42	15664.1	15821.7	-116.661	-117.766	80	0.863788	0.00202231	9.58012	0.86261	0.00218784	3.94721	0.00190556	14.3106	0.00221564	28.0744	0.0575273	-0.730469	45.0133	3.52495	11.9803	0.106755	18.0622	0.0172676	-0.133051	-0.09	0.101004	sample	sample	non ETH-3	0.74539	-3	3	0.612339	sample	1.03528	-0.0214829	0.612457	0.612457	sample	sample	line2	sample	-15	15
2021/07/20 21:51:28	SG-127-8	489	NW	6	18822.9	19247.1	-129.69	-132.125	94	0.204299	0.00193465	9.78353	1.06426	0.00226675	3.33635	0.00185869	14.5134	0.00229732	28.2589	0.0530555	-0.950681	70.4264	4.31121	36.855	0.155177	17.6234	0.0226313	-0.132772	-0.0575695	0.130005	sample	sample	non ETH-3	0.784637	-3	3	0.651866	sample	1.03528	-0.0214829	0.653378	0.653378	sample	sample	line2	sample	-15	15
2021/07/21 00:45:49	SG-127-16	489	NW	11	15274.7	15529.2	-110.883	-112.011	87	0.586564	0.0016267	10.0776	1.3558	0.00269268	3.70475	0.00152545	14.8093	0.0027262	29.1716	0.0661106	-0.647064	67.9469	4.25386	33.4564	0.146257	18.2793	0.0196902	-0.153951	-0.09	0.119356	sample	sample	non ETH-3	0.771504	-3	3	0.617553	sample	1.03528	-0.0214829	0.617855	0.617855	sample	sample	sample	line1	-15	15	1.45243
2021/07/21 02:39:07	SG-127-7	489	NW	14	23573.1	24879.9	-153.767	-158.48	100	0.318752	0.00180127	11.5163	2.7821	0.00274627	3.50383	0.00173985	16.2529	0.0027825	31.5522	0.0451131	-1.17897	18.7425	1.2401	-16.6987	0.0430614	19.4859	0.0151551	-0.160565	-0.09	0.0866932	sample	sample	non ETH-3	0.746495	-3	3	0.58593	sample	1.03528	-0.0214829	0.585116	0.585116	sample	sample	line2	sample	-15	15
2021/07/21 03:15:43	SG-127-28	489	NW	15	18046.5	18906.6	-126.285	-130.728	90	0.352226	0.00171235	9.45758	0.741124	0.00362759	3.46363	0.00168948	14.1865	0.00367517	27.6188	0.0554862	-0.928904	35.7075	2.60309	3.72476	0.0767997	17.4522	0.0183308	-0.115095	-0.0500673	0.110688	sample	sample	non ETH-3	0.746495	-3	3	0.6314	sample	1.03528	-0.0214829	0.632191	0.632191	sample	sample	sample	line1	-15	15	0.837757
2021/07/21 05:13:48	SG-127-13	489	NW	18	21105.8	21788.7	-142.042	-144.743	93	-0.347775	0.00124221	10.863	2.13438	0.00191506	2.85659	0.00119468	15.5957	0.00194008	30.5689	0.0497358	-0.83921	27.2337	1.97418	-6.55878	0.0598033	18.1851	0.0179435	-0.13569	-0.0615986	0.107519	sample	sample	non ETH-3	0.776722	-3	3	0.641032	sample	1.03528	-0.0214829	0.642162	0.642162	sample	sample	line2	sample	-15	15
2021/07/21 06:32:28	SG-127-18	489	NW	20	14194.4	14544.7	-104.46	-106.256	86	0.916386	0.00130094	11.4206	2.68724	0.00218115	4.06047	0.0012083	16.1581	0.00220789	31.6611	0.0695785	-0.887167	57.4987	4.17245	20.2932	0.120378	19.9312	0.0200358	-0.204369	-0.09	0.122481	sample	sample	non ETH-3	0.802045	-3	3	0.597675	sample	1.03528	-0.0214829	0.597276	0.597276	sample	sample	line2	sample	-15	15
2021/07/21 08:33:10	SG-127-30	489	NW	23	18404.5	18751.9	-128.244	-129.764	94	0.140213	0.00324926	9.56314	0.845777	0.00826579	3.26864	0.00328554	14.292	0.00837448	27.7763	0.0452894	-0.983647	32.9939	3.60867	1.09632	0.0708428	17.3017	0.0277594	-0.164783	-0.09	0.129879	sample	sample	non ETH-3	0.791326	-3	3	0.626543	sample	1.03528	-0.0214829	0.627163	0.627163	sample	sample	sample	line1	-15	15	0.901292
2021/07/21 09:10:19	SG-127-10	489	NW	24	15681.2	15888.5	-113.501	-114.389	80	0.146	0.0016483	11.2448	2.51292	0.00245724	3.33252	0.0015688	15.98	0.00248878	31.1549	0.0625069	-1.02725	44.7292	3.95735	9.09992	0.0948493	19.0383	0.0185644	-0.15953	-0.0927049	0.113161	sample	sample	non ETH-3	0.791326	-3	3	0.631797	sample	1.03528	-0.0214829	0.632601	0.632601	sample	sample	line2	sample	-15	15
2021/07/21 12:23:06	SG-127-12	489	NW	29	13613.3	13808.8	-101.044	-102.309	85	0.15832	0.00207816	9.4547	0.738273	0.00374935	3.28184	0.00204536	14.1832	0.00379932	27.9662	0.0689077	-0.584639	53.0923	4.22056	20.7761	0.113654	17.2877	0.0198397	-0.0866859	-0.09	0.114624	sample	sample	non ETH-3	0.733682	-3	3	0.646996	sample	1.03528	-0.0214829	0.648337	0.648337	sample	sample	sample	line1	-15	15	0.83173
2021/07/21 13:01:45	SG-127-26	489	NW	30	20219.6	21253.9	-137.926	-142.319	96	0.665687	0.00129783	11.3109	2.57846	0.00270806	3.82176	0.00125592	16.0474	0.00274289	31.2869	0.0427692	-1.03206	26.9192	2.39309	-8.74749	0.0598391	19.6839	0.0207282	-0.0944352	-0.0832373	0.120258	sample	sample	non ETH-3	0.733682	-3	3	0.639247	sample	1.03528	-0.0214829	0.640314	0.640314	sample	sample	line2	sample	-15	15
2021/07/21 14:25:11	SG-127-14	489	NW	32	18224.2	18713.1	-127.495	-129.409	89	-0.478514	0.00149328	9.86819	1.14818	0.00193946	2.69951	0.001404	14.5969	0.00196379	28.3668	0.0518344	-1.01029	23.9411	2.75064	-7.66097	0.0522135	17.0419	0.0156775	-0.130222	-0.09	0.0942095	sample	sample	non ETH-3	0.769992	-3	3	0.639769	sample	1.03528	-0.0214829	0.640855	0.640855	sample	sample	line2	sample	-15	15
2021/07/21 15:04:10	SG-127-19	489	NW	33	19243.4	19778	-132.98	-134.991	93	0.686576	0.00255964	10.5597	1.83377	0.0055351	3.81522	0.00255771	15.2935	0.0056085	29.7683	0.0608356	-1.02105	26.3072	3.43605	-7.88614	0.0581825	18.9395	0.0225732	-0.0882896	-0.0450309	0.114611	sample	sample	non ETH-3	0.769992	-3	3	0.681702	sample	1.03528	-0.0214829	0.684267	0.684267	sample	sample	sample	line1	-15	15	1.93046
2021/07/21 16:24:57	SG-126-32	489	NW	35	18261.8	19273.5	-127.345	-132.885	89	0.772151	0.00245754	10.2098	1.48685	0.00623903	3.88324	0.00248534	14.9424	0.00632109	29.2273	0.056128	-0.855065	32.0876	2.72043	-1.69194	0.0697022	18.6123	0.0215425	-0.139332	-0.09	0.0999641	sample	sample	non ETH-3	0.779671	-3	3	0.64034	sample	1.03528	-0.0214829	0.641446	0.641446	sample	sample	sample	line1	-15	15	1.6012
2021/07/21 17:05:54	SG-126-35	489	NW	36	20167.3	20644.1	-137.936	-139.531	96	0.459269	0.00192562	10.4646	1.73949	0.00245996	3.59893	0.00183746	15.1976	0.00249212	29.4806	0.0462849	-1.11143	29.4232	3.24197	-4.45997	0.0651913	18.6039	0.015333	-0.102486	-0.0424468	0.0898983	sample	sample	non ETH-3	0.779671	-3	3	0.677185	sample	1.03528	-0.0214829	0.679591	0.679591	sample	sample	line2	sample	-15	15
2021/07/21 18:17:41	SG-127-29	489	NW	38	11354.6	11584.1	-86.385	-88.2005	79	0.227677	0.00155267	11.0248	2.29483	0.00250996	3.40141	0.0014637	15.7593	0.00254149	31.2505	0.0838595	-0.500547	59.0256	3.66439	23.2705	0.133956	18.8808	0.0216437	-0.171455	-0.09	0.127941	sample	sample	non ETH-3	0.827741	-3	3	0.656286	sample	1.03528	-0.0214829	0.657954	0.657954	sample	sample	line2	sample	-15	15
2021/07/21 18:58:47	SG-126-30	489	NW	39	16706.5	17372.1	-118.909	-122.293	82	0.539161	0.00290487	11.069	2.33863	0.00689169	3.6948	0.00292569	15.8043	0.00698273	30.8675	0.0591939	-0.960344	57.6772	4.28111	21.5588	0.12544	19.2711	0.0176421	-0.133645	-0.0183678	0.0912508	sample	sample	non ETH-3	0.827741	-3	3	0.694096	sample	1.03528	-0.0214829	0.697098	0.697098	sample	sample	sample	line1	-15	15	2.46899
2021/07/21 20:57:06	SG-126-31	489	NW	42	17740.9	18143.4	-125.075	-126.118	93	0.891734	0.00150909	11.2057	2.47418	0.00204054	4.0299	0.00143096	15.9423	0.00206667	31.0127	0.0528299	-1.09101	35.4762	3.31674	-0.505224	0.0767141	19.7199	0.0145485	-0.171421	0.132392	0.0911526	sample	sample	non ETH-3	0.845987	-3	3	0.674566	sample	1.03528	-0.0214829	0.676879	0.676879	sample	sample	line2	sample	-15	15
[truncated: 6 more columns]

## Sheet: ETH-3
Date	SA/STD	Run	ID	Row	Sa m44 [mV]	Ref m44 [mV]	Sa m54 [mV]	Ref m54 [mV]	Weight [μg]	d13C [‰]	d13C SE [‰]	d18O( gas) [‰]	d18Occ [‰]	d18Occ SE [‰]	d45 [‰]	d45 SE [‰]	d46 [‰]	d46 SE [‰]	d48 [‰]	d48 SE [‰]	Δ48 [‰]	d49 [‰]	d49 SE [‰]	Δ49 [‰]	49 parameter [-]	d47 [‰]	d47 SE [‰]	Δ47 Raw [‰]	Δ47 Raw offset correction [‰]	D47 SD [‰]	Type	Accepted values [‰]	Offset correction [‰]	Average offset correction [‰]	Range offset correction before	Range offset correction after	Offset corrected all [‰]	Offset corrected STDs [‰]	ETF slope [-]	ETF intercept [-]	Final (70 degree AF) [‰]	Final AFF [‰]	Accepted d18O [‰]	Offset d18O [‰]	Offset Line 1 [‰]	Offset Line 2 [‰]	d18O correction range	d18O correction range	Final 18O Offset Line1 corrected [‰]
2021/05/27 13:04:30	ETH-3	461	STD	4	15336.9	15168.8	-122.475	-121.407	93	1.33942	0.00198829	6.6675	-2.02486	0.00273066	4.29162	0.00191192	11.3881	0.00276678	21.8054	0.0660899	-1.07586	22.0117	3.07299	-5.03076	0.0444816	15.4701	0.0169732	-0.199516	-0.09	0.0990907	STD	0.6132	0.812716	0.78611	-3	3	0.586594	0.586594	1.03528	-0.0214829	0.585804	0.585804	-1.78	0.244864	line2	0.244864	-15	15
2021/05/27 14:53:59	ETH-3	461	STD	7	19549.3	19353.6	-146.19	-144.664	92	1.34769	0.00205877	6.67874	-2.01372	0.00299134	4.29977	0.00199862	11.3994	0.00303146	21.7241	0.0637153	-1.17764	17.5441	3.89667	-9.41076	0.0375161	15.5438	0.0177812	-0.146303	-0.09	0.102085	STD	0.6132	0.759503	0.773115	-3	3	0.626812	0.626812	1.03528	-0.0214829	0.62744	0.62744	-1.78	0.23372	0.23372	line1	-15	15	-1.64657
2021/05/27 16:41:35	ETH-3	461	STD	10	18196.2	18288.3	-137.747	-138.208	92	1.31876	0.0017226	6.64333	-2.04883	0.00206682	4.27142	0.00163262	11.3638	0.00209345	21.8614	0.0547769	-0.973075	26.209	3.11321	-0.875835	0.057595	15.4917	0.0176089	-0.133926	-0.09	0.108633	STD	0.6132	0.747126	0.747318	-3	3	0.613393	0.613393	1.03528	-0.0214829	0.613548	0.613548	-1.78	0.268829	line2	0.268829	-15	15
2021/05/27 18:31:16	ETH-3	461	STD	13	20948.6	21110.2	-152.799	-153.155	91	1.32674	0.00197206	6.57313	-2.11842	0.00231258	4.27646	0.00189438	11.2934	0.00234376	21.6527	0.0547223	-1.03793	18.481	2.33915	-8.26941	0.0417275	15.4394	0.0159818	-0.122126	-0.09	0.091172	STD	0.6132	0.735326	0.752507	-3	3	0.630381	0.630381	1.03528	-0.0214829	0.631135	0.631135	-1.78	0.338416	0.338416	line1	-15	15	-1.77598
2021/05/27 20:19:46	ETH-3	461	STD	16	20485.7	20644.2	-150.551	-150.477	94	1.37137	0.00248128	6.69501	-1.99759	0.00277633	4.32251	0.00239199	11.4158	0.00281451	21.9525	0.0582199	-0.986693	22.7355	3.00829	-4.41248	0.051138	15.5679	0.0216892	-0.161869	-0.09	0.12369	STD	0.6132	0.775069	0.773582	-3	3	0.611713	0.611713	1.03528	-0.0214829	0.611809	0.611809	-1.78	0.217589	line2	0.217589	-15	15
2021/05/27 22:05:30	ETH-3	461	STD	19	19672.4	19602.6	-145.631	-145.541	91	1.3594	0.00205967	6.63632	-2.05577	0.0030954	4.30926	0.00201573	11.3569	0.0031374	21.7536	0.0432357	-1.06469	17.63	3.60907	-9.25531	0.0396631	15.4601	0.0210804	-0.19715	-0.09	0.118314	STD	0.6132	0.81035	0.787315	-3	3	0.590166	0.590166	1.03528	-0.0214829	0.589502	0.589502	-1.78	0.275771	0.275771	line1	-15	15	-1.78764
2021/05/27 23:55:27	ETH-3	461	STD	22	20743.1	20925	-151.787	-152.008	94	1.34207	0.00208939	6.68238	-2.01011	0.00269767	4.29463	0.00200176	11.403	0.00273329	21.7541	0.0525569	-1.15549	11.2506	2.95194	-15.5389	0.0258517	15.5248	0.0174365	-0.163327	-0.09	0.0989069	STD	0.6132	0.776527	0.798285	-3	3	0.634958	0.634958	1.03528	-0.0214829	0.635874	0.635874	-1.78	0.230115	line2	0.230115	-15	15
2021/05/28 01:41:43	ETH-3	461	STD	25	22013.9	22293.6	-158.598	-159.082	98	1.35011	0.00193162	6.69374	-1.99885	0.00260676	4.30255	0.0018707	11.4145	0.00264192	22.0474	0.0596182	-0.891352	10.6961	2.59421	-16.1088	0.025198	15.5124	0.0179188	-0.194779	-0.09	0.107075	STD	0.6132	0.807979	0.7853	-3	3	0.590521	0.590521	1.03528	-0.0214829	0.58987	0.58987	-1.78	0.218846	0.218846	line1	-15	15	-1.71482
2021/05/28 03:31:38	ETH-3	461	STD	28	20653	20747.6	-150.809	-150.75	93	1.29909	0.00241457	6.61718	-2.07474	0.00237187	4.25208	0.00231048	11.3375	0.00240433	21.7969	0.0636528	-0.984179	14.7979	2.49231	-11.915	0.0339292	15.4209	0.0181696	-0.158195	-0.09	0.0989826	STD	0.6132	0.771395	0.783597	-3	3	0.625402	0.625402	1.03528	-0.0214829	0.625981	0.625981	-1.78	0.294744	line2	0.294744	-15	15
2021/05/28 05:22:41	ETH-3	461	STD	31	20771.2	20719.9	-151.382	-150.862	92	1.42079	0.00228477	6.86573	-1.82835	0.00327127	4.37476	0.00222921	11.5872	0.00331573	22.2952	0.0682138	-0.990395	19.7479	3.02702	-7.70641	0.0451628	15.7954	0.0158029	-0.158216	-0.09	0.0859757	STD	0.6132	0.771416	0.776595	-3	3	0.618379	0.618379	1.03528	-0.0214829	0.61871	0.61871	-1.78	0.0483467	0.0483467	line1	-15	15	-1.55605
2021/05/28 07:10:06	ETH-3	461	STD	34	19996.1	20078.8	-147.538	-147.295	90	1.28128	0.00208018	6.57024	-2.12128	0.00256707	4.23377	0.00201393	11.2904	0.0026022	21.6153	0.0459394	-1.06855	13.3619	2.52584	-13.2038	0.0305823	15.3394	0.0177843	-0.173774	-0.09	0.104412	STD	0.6132	0.786974	0.779195	-3	1	0.605421	0.605421	1.03528	-0.0214829	0.605295	0.605295	-1.78	0.341285	line2	0.341285	-15	15
2021/05/28 16:28:58	ETH-3	462	STD	1	21345.3	21597.4	-155.631	-157.401	96	1.35058	0.00319693	6.68572	-2.0068	0.00512578	4.30271	0.00316095	11.4064	0.00519588	21.9708	0.0583162	-0.950325	19.711	4.89931	-7.31933	0.0454355	15.578	0.027561	-0.122459	-0.09	0.132974	STD	0.6132	0.735659	0.805897	0	3	0.683438	0.683438	1.03528	-0.0214829	0.686064	0.686064	-1.78	0.226802	0.226802	line1	-15	15	-1.73816
2021/05/28 18:07:57	ETH-3	462	STD	4	11099	10934.3	-93.162	-92.4005	95	1.30428	0.00189763	6.58541	-2.10625	0.00250995	4.25584	0.00181409	11.3056	0.00254281	22.0104	0.07644	-0.712431	24.9838	4.18952	-1.93957	0.054781	15.287	0.0236066	-0.262935	-0.09	0.14071	STD	0.6132	0.876135	0.825606	-3	3	0.562672	0.562672	1.03528	-0.0214829	0.561038	0.561038	-1.78	0.326249	line2	0.326249	-15	15
2021/05/28 19:53:23	ETH-3	462	STD	7	13666.5	13544.9	-110.852	-109.939	75	1.30403	0.00174084	6.65594	-2.03633	0.00288081	4.25806	0.00167868	11.3764	0.00291837	22.1344	0.0489662	-0.73109	31.6114	3.76146	4.37347	0.0668628	15.3704	0.0200144	-0.251825	-0.09	0.119256	STD	0.6132	0.865025	0.867163	-3	3	0.615337	0.615337	1.03528	-0.0214829	0.615561	0.615561	-1.78	0.256325	0.256325	line1	-15	15	-1.70088
2021/05/28 21:34:23	ETH-3	462	STD	10	16879.5	16812.8	-130.549	-130.296	84	1.28788	0.00171363	6.67703	-2.01541	0.00245012	4.24366	0.00164567	11.3976	0.00248229	21.9686	0.0601862	-0.934962	23.1379	3.21355	-3.90203	0.0492015	15.3811	0.0199612	-0.247128	-0.09	0.113508	STD	0.6132	0.860328	0.867076	-3	3	0.619948	0.619948	1.03528	-0.0214829	0.620334	0.620334	-1.78	0.235413	line2	0.235413	-15	15
2021/05/28 23:21:30	ETH-3	462	STD	13	14294	13960.6	-114.622	-112.427	76	1.34864	0.00232022	6.66212	-2.03019	0.00360326	4.30007	0.00226022	11.3827	0.00365146	22.0187	0.0612907	-0.856639	24.7179	4.35986	-2.39533	0.0515965	15.4095	0.0208946	-0.262675	-0.09	0.111072	STD	0.6132	0.875875	0.8495	-3	3	0.586825	0.586825	1.03528	-0.0214829	0.586043	0.586043	-1.78	0.250193	0.250193	line1	-15	15	-1.64044
2021/05/29 01:09:18	ETH-3	462	STD	16	14206.6	13877.3	-113.929	-112.297	77	1.34962	0.00282106	6.67144	-2.02095	0.00313698	4.30131	0.00272676	11.3921	0.00318057	22.0101	0.0711121	-0.883529	30.0583	5.15334	2.7839	0.0624043	15.4846	0.0231271	-0.199097	-0.09	0.129645	STD	0.6132	0.812297	0.835849	-3	3	0.636752	0.636752	1.03528	-0.0214829	0.637731	0.637731	-1.78	0.240955	line2	0.240955	-15	15
2021/05/29 02:51:38	ETH-3	462	STD	19	15907.1	15722.9	-124.522	-123.512	79	1.17876	0.00286234	6.21302	-2.47542	0.00659458	4.12529	0.00286485	10.9316	0.0066815	21.3521	0.0637263	-0.616939	30.8901	2.7843	4.68039	0.0652176	14.8393	0.0254016	-0.206175	-0.09	0.134378	STD	0.6132	0.819375	0.815836	-3	0	0.609661	0.609661	1.03528	-0.0214829	0.609685	0.609685	-1.78	0.695417	0.695417	line1	-15	15	-2.01885
2021/05/31 14:03:38	ETH-3	463	STD	4	18920	18862.8	-145.431	-145.472	95	1.30479	0.00211439	6.5767	-2.11488	0.00256766	4.25601	0.00203346	11.2969	0.00260221	21.5969	0.0569655	-1.09948	19.9663	3.4957	-6.80867	0.0551573	15.3402	0.0216529	-0.202162	-0.09	0.122538	STD	0.6132	0.815362	0.792155	-3	3	0.589993	0.589993	1.03528	-0.0214829	0.589323	0.589323	-1.78	0.33488	line2	0.33488	-15	15
2021/05/31 15:51:02	ETH-3	463	STD	7	18993.3	18930	-145.77	-145.284	87	1.26203	0.00220528	6.48226	-2.2085	0.00323003	4.21267	0.00215499	11.202	0.00327391	21.5566	0.0551779	-0.951426	17.8112	2.81857	-8.67887	0.0464982	15.2485	0.0184385	-0.155749	-0.09	0.102464	STD	0.6132	0.768949	0.800998	-3	3	0.645249	0.645249	1.03528	-0.0214829	0.646528	0.646528	-1.78	0.428501	0.428501	line1	-15	15	-1.72351
2021/05/31 17:30:50	ETH-3	463	STD	10	16105.5	16231	-128.541	-129.252	81	1.2745	0.00195965	6.55614	-2.13526	0.0036154	4.22692	0.00192137	11.2762	0.00366319	21.9506	0.0717678	-0.712768	30.0679	2.81369	3.09904	0.0755298	15.2861	0.0234504	-0.205483	-0.09	0.134712	STD	0.6132	0.818683	0.769809	-3	3	0.564325	0.564325	1.03528	-0.0214829	0.56275	0.56275	-1.78	0.355259	line2	0.355259	-15	15
2021/05/31 19:16:31	ETH-3	463	STD	13	20017.3	20094.5	-151.384	-151.234	94	1.22183	0.00196366	6.28478	-2.40428	0.00306335	4.16814	0.00191557	11.0037	0.00310441	21.1032	0.061232	-1.00306	11.1516	2.67785	-14.7389	0.02849	15.0542	0.0173899	-0.108594	-0.09	0.0921611	STD	0.6132	0.721794	0.790795	-3	3	0.682201	0.682201	1.03528	-0.0214829	0.684784	0.684784	-1.78	0.624278	0.624278	line1	-15	15	-1.91065
2021/05/31 21:04:18	ETH-3	463	STD	16	17900.9	17787.1	-138.903	-138.089	85	1.30318	0.00213651	6.587	-2.10467	0.00341433	4.25486	0.00209673	11.3072	0.00346043	22.1144	0.0585955	-0.613876	34.1869	3.25118	7.01939	0.0835396	15.3324	0.0199974	-0.218708	-0.09	0.111573	STD	0.6132	0.831908	0.795239	-3	3	0.57653	0.57653	1.03528	-0.0214829	0.575385	0.575385	-1.78	0.324665	line2	0.324665	-15	15
2021/05/31 22:46:48	ETH-3	463	STD	19	16800.3	16791.9	-132.11	-132.602	82	1.30597	0.00222908	6.61083	-2.08105	0.0025717	4.25831	0.00212491	11.3312	0.00260558	21.9657	0.0606694	-0.806559	25.3604	2.81328	-1.62491	0.0604218	15.3596	0.0209842	-0.218813	-0.09	0.117978	STD	0.6132	0.832013	0.821498	-3	3	0.602685	0.602685	1.03528	-0.0214829	0.602462	0.602462	-1.78	0.301045	0.301045	line1	-15	15	-1.64006
2021/06/01 00:33:06	ETH-3	463	STD	22	19902.8	20069.7	-150.084	-150.978	92	1.29657	0.00141368	6.56313	-2.12833	0.00245561	4.24785	0.0013755	11.2833	0.00248794	21.7836	0.0512751	-0.889961	16.2926	2.1478	-10.3508	0.0397123	15.3333	0.0167783	-0.187372	-0.09	0.101072	STD	0.6132	0.800572	0.8296	-3	3	0.642228	0.642228	1.03528	-0.0214829	0.643401	0.643401	-1.78	0.348333	line2	0.348333	-15	15
2021/06/01 02:13:50	ETH-3	463	STD	25	17642.2	17813.4	-137.152	-138.038	84	1.30116	0.00163218	6.60111	-2.09069	0.00223442	4.25347	0.00156538	11.3214	0.0022638	21.8987	0.06253	-0.852768	24.9454	3.36078	-2.00479	0.0586825	15.3203	0.0207654	-0.243015	-0.09	0.120003	STD	0.6132	0.856215	0.810032	-3	3	0.567017	0.567017	1.03528	-0.0214829	0.565536	0.565536	-1.78	0.310685	0.310685	line1	-15	15	-1.6623
2021/06/01 03:57:53	ETH-3	463	STD	28	18395.8	18312.1	-141.237	-141.506	86	1.18919	0.00310967	6.19238	-2.49588	0.00674573	4.13434	0.00311821	10.9109	0.00683546	21.1376	0.0643236	-0.785965	24.5568	2.79658	-1.46158	0.057437	14.8751	0.022127	-0.160109	-0.09	0.117435	STD	0.6132	0.773309	0.800132	-3	3	0.640023	0.640023	1.03528	-0.0214829	0.641118	0.641118	-1.78	0.71588	line2	0.71588	-15	15
2021/06/01 05:44:52	ETH-3	463	STD	31	22459.7	22669.7	-164.06	-164.019	92	1.3055	0.00213275	6.54065	-2.15062	0.00291015	4.25543	0.00206617	11.2607	0.00294937	21.6152	0.0492749	-1.01015	8.80845	2.44448	-17.6039	0.0226407	15.3491	0.0181361	-0.157673	-0.09	0.0967142	STD	0.6132	0.770873	0.779341	-3	3	0.621668	0.621668	1.03528	-0.0214829	0.622115	0.622115	-1.78	0.370617	0.370617	line1	-15	15	-1.74362
2021/06/01 07:25:59	ETH-3	463	STD	34	19057.2	19161.6	-145.108	-145.626	88	1.21437	0.00165794	6.34293	-2.34663	0.00304471	4.16317	0.00161224	11.0621	0.00308452	21.4866	0.0571289	-0.74332	17.685	2.85092	-8.47995	0.0422849	15.0335	0.0165812	-0.18064	-0.09	0.0933957	STD	0.6132	0.79384	0.816417	-3	3	0.635777	0.635777	1.03528	-0.0214829	0.636721	0.636721	-1.78	0.566632	line2	0.566632	-15	15
2021/06/01 09:13:24	ETH-3	463	STD	37	17466.2	17327.2	-135.964	-134.811	84	1.29594	0.00230943	6.55849	-2.13293	0.00283471	4.24709	0.00223903	11.2786	0.0028737	21.7535	0.0568011	-0.910227	21.4633	3.63654	-5.30643	0.050329	15.2426	0.0206486	-0.271337	-0.09	0.114579	STD	0.6132	0.884537	0.804209	-3	3	0.532872	0.532872	1.03528	-0.0214829	0.530187	0.530187	-1.78	0.352927	0.352927	line1	-15	15	-1.73297
2021/06/01 10:56:26	ETH-3	463	STD	40	18058.6	18002.6	-139.548	-138.82	85	1.29647	0.00246859	6.45424	-2.23628	0.00372855	4.24396	0.00239487	11.174	0.00377822	21.7004	0.0685137	-0.755395	21.0369	3.17851	-5.5162	0.0496803	15.2887	0.0235893	-0.121049	-0.09	0.135142	STD	0.6132	0.734249	0.776065	-3	3	0.655016	0.655016	1.03528	-0.0214829	0.656639	0.656639	-1.78	0.456278	line2	0.456278	-15	15
2021/06/01 12:42:23	ETH-3	463	STD	43	21658.4	21671.4	-159.738	-158.642	92	1.27197	0.001882	6.41425	-2.27592	0.00282359	4.21962	0.00183067	11.1338	0.00286144	21.3285	0.0630427	-1.03968	-1.30914	2.6625	-27.1796	-0.00201701	15.2489	0.0199955	-0.0962095	-0.09	0.113097	STD	0.6132	0.709409	0.721829	-3	1	0.62562	0.62562	1.03528	-0.0214829	0.626207	0.626207	-1.78	0.495923	0.495923	line1	-15	15	-1.85811
2021/06/02 12:27:58	ETH-3	464	STD	4	18103.5	18036.9	-143.09	-142.566	95	1.27252	0.00164853	6.52458	-2.16655	0.00323104	4.22397	0.00160167	11.2445	0.00327299	21.9769	0.058304	-0.624452	11.9223	2.8511	-14.5075	0.0225911	15.292	0.017978	-0.16582	-0.09	0.101021	STD	0.6132	0.77902	0.785581	-3	3	0.619761	0.619761	1.03528	-0.0214829	0.62014	0.62014	-1.78	0.386548	line2	0.386548	-15	15
2021/06/02 14:12:31	ETH-3	464	STD	7	17735.4	17511.9	-139.757	-138.74	75	1.28423	0.00247676	6.53257	-2.15863	0.00341736	4.23522	0.00241472	11.2526	0.00346402	21.814	0.0715176	-0.79957	15.9458	4.22303	-10.6171	0.0316088	15.2984	0.0190236	-0.178941	-0.09	0.0991831	STD	0.6132	0.792141	0.800624	-3	3	0.621683	0.621683	1.03528	-0.0214829	0.62213	0.62213	-1.78	0.378627	0.378627	line1	-15	15	-1.72539
2021/06/02 15:57:00	ETH-3	464	STD	10	18857.5	19135.2	-145.705	-146.67	84	1.32616	0.00157744	6.57763	-2.11396	0.00199138	4.27607	0.00150378	11.2979	0.00201738	21.8797	0.0583953	-0.82489	8.66666	2.6558	-17.8341	0.0185129	15.3465	0.0161799	-0.21751	-0.09	0.0994754	STD	0.6132	0.83071	0.811426	-3	3	0.593916	0.593916	1.03528	-0.0214829	0.593384	0.593384	-1.78	0.333959	line2	0.333959	-15	15
2021/06/02 19:30:22	ETH-3	464	STD	16	15308	14976.1	-123.724	-121.564	77	1.24414	0.00381302	6.32341	-2.36599	0.00567012	4.19039	0.00372284	11.0425	0.00574681	21.395	0.0587152	-0.794346	27.9201	5.09275	1.49945	0.0569329	15.0237	0.0236963	-0.199203	-0.09	0.118434	STD	0.6132	0.812403	0.839701	-3	3	0.640498	0.640498	1.03528	-0.0214829	0.641609	0.641609	-1.78	0.585986	line2	0.585986	-15	15
2021/06/02 21:15:55	ETH-3	464	STD	19	14188.7	14189.9	-116.751	-116.697	79	1.27516	0.00147505	6.46287	-2.22773	0.00224798	4.2243	0.00140778	11.1826	0.00227695	21.7145	0.0689265	-0.758646	25.9084	3.75053	-0.766507	0.0532121	15.1419	0.0197587	-0.253799	-0.09	0.118452	STD	0.6132	0.866999	0.839701	-3	3	0.585902	0.585902	1.03528	-0.0214829	0.585088	0.585088	-1.78	0.447727	0.447727	line1	-15	15	-1.76271
2021/06/03 00:07:14	ETH-3	464	STD	25	18679.8	18519.7	-143.923	-142.678	88	1.25734	0.00190186	6.44182	-2.2486	0.00350144	4.20687	0.0018578	11.1614	0.0035475	21.5662	0.0629171	-0.8618	13.7442	2.53765	-12.556	0.0296952	15.1104	0.0198568	-0.246358	-0.179172	0.112225	STD	0.6132	0.859558	0.842955	-3	3	0.596598	0.596598	1.03528	-0.0214829	0.596161	0.596161	-1.78	0.468595	0.468595	line1	-15	15	-1.76893
2021/06/03 02:51:33	ETH-3	464	STD	31	17184.6	16909.6	-134.738	-132.922	81	1.28223	0.00249602	6.49379	-2.19708	0.00312502	4.232	0.00240767	11.2136	0.00316724	21.7329	0.0652609	-0.802008	12.7464	3.71884	-13.6545	0.0279615	15.2218	0.016322	-0.213153	-0.129015	0.0847722	STD	0.6132	0.826353	0.835355	-3	3	0.622202	0.622202	1.03528	-0.0214829	0.622668	0.622668	-1.78	0.417078	0.417078	line1	-15	15	-1.75235
2021/06/03 05:31:47	ETH-3	464	STD	37	16502.1	16464.7	-130.187	-130.326	80	1.21195	0.00213931	6.29048	-2.39863	0.00348686	4.15908	0.00209339	11.0094	0.00353356	21.1665	0.0741965	-0.952361	24.5647	4.40533	-1.67128	0.0542661	14.9505	0.0207357	-0.206955	-0.106439	0.119227	STD	0.6132	0.820155	0.820575	-3	3	0.61362	0.61362	1.03528	-0.0214829	0.613784	0.613784	-1.78	0.618629	0.618629	line1	-15	15	-1.9539
2021/06/03 08:14:20	ETH-3	464	STD	43	17006.9	16839.3	-133.308	-132.231	86	1.25926	0.0018588	6.45103	-2.23946	0.00334449	4.20899	0.00180181	11.1707	0.00338812	21.6665	0.0683416	-0.782008	13.7538	2.47067	-12.5666	0.0316373	15.1667	0.0204232	-0.202018	#DIV/0!	0.119872	STD	0.6132	0.815218	0.817686	-3	0	0.615669	0.615669	1.03528	-0.0214829	0.615904	0.615904	-1.78	0.459463	0.459463	line1	-15	15	-1.80775
2021/06/03 15:03:21	ETH-3	465	STD	4	17673.8	17686	-137.93	-137.156	83	1.3271	0.0019951	6.64012	-2.05201	0.00304372	4.27913	0.00193721	11.3606	0.00308428	22.0243	0.0631779	-0.807452	20.652	2.68149	-6.28834	0.0553039	15.4174	0.0167	-0.211883	-0.09	0.0947947	STD	0.6132	0.825083	0.81025	-3	3	0.598367	0.598367	1.03528	-0.0214829	0.597992	0.597992	-1.78	0.272008	line2	0.272008	-15	15
2021/06/03 16:50:00	ETH-3	465	STD	7	19166.5	19005.1	-146.061	-145.008	88	1.36494	0.00276868	6.67736	-2.01509	0.00275224	4.31588	0.0026712	11.3981	0.00279118	21.9966	0.0545215	-0.908558	21.3587	2.89806	-5.71153	0.0559691	15.5228	0.0171613	-0.182217	-0.09	0.0946577	STD	0.6132	0.795417	0.812006	-3	3	0.62979	0.62979	1.03528	-0.0214829	0.630523	0.630523	-1.78	0.235085	0.235085	line1	-15	15	-1.58813
2021/06/03 18:33:20	ETH-3	465	STD	10	17526.1	17509.5	-136.847	-136.666	93	1.262	0.00185094	6.4877	-2.20311	0.00270291	4.21283	0.00178806	11.2075	0.00273877	21.7733	0.0532887	-0.750341	30.8713	3.03267	4.03061	0.0783908	15.2068	0.0173145	-0.202319	-0.09	0.0978334	STD	0.6132	0.815519	0.82339	-3	3	0.621072	0.621072	1.03528	-0.0214829	0.621498	0.621498	-1.78	0.423107	line2	0.423107	-15	15
2021/06/03 20:21:27	ETH-3	465	STD	13	22092.5	22304.6	-162.132	-162.846	97	1.30827	0.00219274	6.57089	-2.12064	0.00283856	4.25908	0.00212124	11.2911	0.002877	21.7913	0.0559969	-0.897929	14.2831	2.09979	-12.3346	0.0378807	15.2931	0.0166634	-0.246036	-0.09	0.0927572	STD	0.6132	0.859236	0.835251	-3	3	0.589214	0.589214	1.03528	-0.0214829	0.588517	0.588517	-1.78	0.340637	0.340637	line1	-15	15	-1.74004
2021/06/03 22:08:02	ETH-3	465	STD	16	20204.7	20262.8	-151.733	-151.938	90	1.42858	0.00222276	6.85989	-1.83413	0.00391746	4.38185	0.0022006	11.5814	0.0039703	22.4545	0.0588072	-0.823222	21.8236	3.12849	-5.68307	0.0557237	15.7365	0.0215934	-0.217797	-0.09	0.120641	STD	0.6132	0.830997	0.836502	-3	3	0.618705	0.618705	1.03528	-0.0214829	0.619048	0.619048	-1.78	0.0541303	line2	0.0541303	-15	15
2021/06/03 23:53:06	ETH-3	465	STD	19	17728.8	17594.1	-137.547	-136.623	90	1.31851	0.00205132	6.62054	-2.07141	0.00319454	4.2704	0.00199821	11.3409	0.00323726	21.9085	0.0511007	-0.88184	28.1884	2.92529	1.09656	0.0700528	15.3947	0.0158559	-0.206074	-0.09	0.0839544	STD	0.6132	0.819274	0.824807	-3	3	0.618733	0.618733	1.03528	-0.0214829	0.619076	0.619076	-1.78	0.291413	0.291413	line1	-15	15	-1.73342
2021/06/04 01:39:46	ETH-3	465	STD	22	19825.7	19992.4	-149.488	-150.019	91	1.28563	0.00219038	6.62124	-2.07073	0.00253965	4.23962	0.00210529	11.3416	0.00257401	21.9882	0.0557568	-0.805148	23.0418	1.87915	-3.88267	0.0579806	15.3583	0.0192469	-0.210949	-0.09	0.115065	STD	0.6132	0.824149	0.811534	-3	3	0.600585	0.600585	1.03528	-0.0214829	0.600288	0.600288	-1.78	0.290728	line2	0.290728	-15	15
2021/06/04 03:23:29	ETH-3	465	STD	25	22719.1	23370.5	-165.25	-167.276	95	1.30706	0.00205151	6.62778	-2.06424	0.00241977	4.25992	0.00197369	11.3482	0.00245251	21.7703	0.0448969	-1.03128	8.97968	1.79157	-17.6084	0.0236007	15.4195	0.016233	-0.177978	-0.09	0.0952766	STD	0.6132	0.791178	0.795087	-3	3	0.617109	0.617109	1.03528	-0.0214829	0.617396	0.617396	-1.78	0.284239	0.284239	line1	-15	12	-1.70566
2021/06/04 05:10:30	ETH-3	465	STD	28	17902.8	18022.3	-138.557	-139.181	84	1.30526	0.00203965	6.56313	-2.12833	0.0019717	4.25599	0.00193723	11.2833	0.00199786	21.8425	0.0567391	-0.832429	25.0989	2.85547	-1.78407	0.0616113	15.3729	0.0197908	-0.156735	-0.09	0.121584	STD	0.6132	0.769935	0.784379	-3	3	0.627645	0.627645	1.03528	-0.0214829	0.628303	0.628303	-1.78	0.348332	line2	0.348332	-15	9
2021/06/04 06:40:48	ETH-3	465	STD	31	18676.6	18706.1	-142.693	-142.859	87	1.31211	0.00249774	6.62221	-2.06976	0.00311252	4.26445	0.00242487	11.3426	0.00315537	21.9703	0.0598569	-0.824689	26.9659	3.25114	-0.0907245	0.0667812	15.4179	0.025791	-0.178825	-0.216566	0.135866	STD	0.6132	0.792025	0.78098	-3	3	0.602155	0.602155	1.03528	-0.0214829	0.601914	0.601914	-1.78	0.289761	0.289761	line1	-15	7	-1.68227
2021/06/04 13:32:01	ETH-3	465	STD	39	20547.3	20757.2	-153.749	-154.975	85	1.22297	0.00196061	6.3482	-2.3414	0.00244334	4.17141	0.00189213	11.0674	0.00247642	21.4317	0.0552789	-0.807545	20.0186	2.18353	-6.2251	0.0581877	15.0665	0.018861	-0.161783	-0.00498914	0.106998	STD	0.6132	0.774983	0.774983	-3	2	0.6132	0.6132	1.03528	-0.0214829	0.613348	0.613348	-1.78	0.561404	0.561404	line1	-15	2	-1.75458
2021/06/04 20:27:50	ETH-3	466	STD	4	17945.5	17924.7	-139.85	-139.418	94	1.37175	0.00224991	6.71495	-1.97782	0.00299629	4.32356	0.00217782	11.4358	0.00303674	21.9608	0.0544704	-1.01809	12.3012	3.96336	-14.6094	0.0279868	15.521	0.0191068	-0.228601	-0.09	0.113091	STD	0.6132	0.841801	0.841801	-3	3	0.6132	0.6132	1.03528	-0.0214829	0.613348	0.613348	-1.78	0.197824	line2	0.197824	-15	15
2021/06/04 23:52:38	ETH-3	466	STD	10	17279.7	17328.3	-135.746	-135.957	90	0.948446	0.00230281	5.69843	-2.98556	0.00269445	3.8916	0.00222783	10.4146	0.00273161	19.8093	0.0614927	-1.10521	26.505	3.7099	1.66145	0.0572937	14.103	0.0156596	-0.188903	-0.09	0.094756	STD	0.6132	0.802103	0.802103	-3	3	0.6132	0.6132	1.03528	-0.0214829	0.613348	0.613348	-1.78	1.20556	line2	1.20556	-15	15
2021/06/05 03:23:08	ETH-3	466	STD	16	17247.1	17327.7	-135.411	-135.401	87	0.853656	0.00283221	5.49864	-3.18363	0.00333856	3.79584	0.00274165	10.2139	0.00338463	19.4194	0.0466334	-1.09026	15.7633	4.43283	-8.3329	0.0342646	13.8112	0.0222824	-0.18298	-0.09	0.121072	STD	0.6132	0.79618	0.79618	-3	3	0.6132	0.6132	1.03528	-0.0214829	0.613348	0.613348	-1.78	1.40363	line2	1.40363	-15	15
2021/06/05 06:49:13	ETH-3	466	STD	22	16667.2	16532.9	-131.547	-130.645	83	1.38942	0.00311646	6.8432	-1.85068	0.00526802	4.34458	0.00306675	11.5646	0.00533887	22.4888	0.0679451	-0.756457	41.1683	3.78749	13.2136	0.0867944	15.7511	0.0206708	-0.148753	-0.09	0.0997624	STD	0.6132	0.761953	0.761953	-3	3	0.6132	0.6132	1.03528	-0.0214829	0.613348	0.613348	-1.78	0.0706793	line2	0.0706793	-15	15
2021/06/05 11:55:48	ETH-3	466	STD	31	14788.7	14463.5	-119.892	-118.085	76	1.33618	0.00211426	6.63918	-2.05294	0.00328998	4.2876	0.00205036	11.3597	0.0033336	21.959	0.0740138	-0.869509	26.9095	5.49738	-0.203968	0.055497	15.4381	0.0158827	-0.199307	-0.09	0.0896939	STD	0.6132	0.812507	0.80198	-3	3	0.602673	0.602673	1.03528	-0.0214829	0.60245	0.60245	-1.78	0.27294	0.27294	line1	-15	15	-1.49167
2021/06/05 13:34:44	ETH-3	466	STD	34	18084.2	18218.5	-140.513	-140.829	88	1.34707	0.00190667	6.67372	-2.01869	0.00264435	4.29901	0.00184118	11.3944	0.00267963	21.8121	0.0711629	-1.08163	21.8346	3.71751	-5.22329	0.046803	15.5056	0.0199735	-0.178253	-0.09	0.11337	STD	0.6132	0.791453	0.80198	-3	3	0.623727	0.623727	1.03528	-0.0214829	0.624247	0.624247	-1.78	0.238693	line2	0.238693	-15	15
2021/06/05 17:03:47	ETH-3	466	STD	40	14904.4	14983.6	-120.434	-120.642	77	1.05322	0.00144822	5.97518	-2.71121	0.00185655	3.99939	0.00137332	10.6926	0.00188041	20.5669	0.0709923	-0.912984	19.8922	3.36689	-5.44236	0.0417106	14.4232	0.0173069	-0.254453	-0.09	0.105254	STD	0.6132	0.867653	0.828403	-3	3	0.57395	0.57395	1.03528	-0.0214829	0.572714	0.572714	-1.78	0.931208	line2	0.931208	-15	15
2021/06/05 18:47:10	ETH-3	466	STD	43	19374.1	19579.7	-147.376	-148.017	94	0.754326	0.00206084	5.26299	-3.41725	0.00219489	3.69458	0.00197436	9.97712	0.00222466	18.9306	0.054519	-1.10109	7.97829	3.32673	-15.3733	0.0183054	13.4792	0.0214226	-0.175954	-0.09	0.126518	STD	0.6132	0.789154	0.821886	-3	3	0.645933	0.645933	1.03528	-0.0214829	0.647236	0.647236	-1.78	1.63725	1.63725	line1	-15	15	-2.75719
2021/06/05 20:29:49	ETH-3	466	STD	46	17034.9	16905.8	-133.901	-132.278	85	1.00576	0.00204	5.88712	-2.7985	0.00257529	3.95186	0.00196823	10.6041	0.00261005	20.3248	0.056094	-0.97506	15.775	3.48083	-9.23731	0.0340024	14.346	0.0252593	-0.195652	-0.09	0.148709	STD	0.6132	0.808852	0.799003	-3	0	0.603351	0.603351	1.03528	-0.0214829	0.603152	0.603152	-1.78	1.0185	line2	1.0185	-15	15
2021/06/07 13:28:42	ETH-3	467	STD	4	14536.2	14556.9	-119.285	-119.489	78	1.03183	0.00176281	5.88659	-2.79903	0.00185697	3.97628	0.00167136	10.6036	0.00188119	20.3654	0.0689117	-0.934361	21.2437	3.58901	-3.92773	0.0467257	14.4085	0.0162791	-0.158632	-0.09	0.101737	STD	0.6132	0.771832	0.773767	-3	3	0.615135	0.615135	1.03528	-0.0214829	0.615352	0.615352	-1.78	1.01903	line2	1.01903	-4	15
2021/06/07 15:10:58	ETH-3	467	STD	7	17547.7	17539	-138.196	-138.022	90	1.30601	0.00193772	6.51659	-2.17447	0.00250456	4.25507	0.00186154	11.2366	0.00253786	21.709	0.0541061	-0.870643	32.5258	4.15118	5.54003	0.0730953	15.32	0.0212436	-0.162502	-0.09	0.121758	STD	0.6132	0.775702	0.791913	-3	3	0.629411	0.629411	1.03528	-0.0214829	0.630131	0.630131	-1.78	0.394466	0.394466	line1	-7	15	-1.78963
2021/06/07 16:50:59	ETH-3	467	STD	10	16420.3	16332.2	-130.622	-130.294	82	1.31437	0.00233141	6.56558	-2.12591	0.00296173	4.26461	0.00225271	11.2857	0.00300183	21.8939	0.0604826	-0.787071	32.9239	4.19427	5.82105	0.0732055	15.3252	0.0254326	-0.215005	-0.09	0.141808	STD	0.6132	0.828205	0.777784	-3	3	0.562779	0.562779	1.03528	-0.0214829	0.561149	0.561149	-1.78	0.345907	line2	0.345907	-10	15
2021/06/07 18:37:04	ETH-3	467	STD	13	18365.1	18334.8	-142.646	-141.645	89	1.40761	0.00170295	6.79399	-1.89947	0.00168277	4.35991	0.00160916	11.5152	0.00170452	22.3315	0.0606729	-0.812642	18.5375	2.47652	-8.72937	0.0426156	15.7514	0.0220695	-0.116245	-0.09	0.127988	STD	0.6132	0.729445	0.796533	-3	3	0.680288	0.680288	1.03528	-0.0214829	0.682803	0.682803	-1.78	0.11947	0.11947	line1	-13	15	-1.51463
2021/06/07 20:18:50	ETH-3	467	STD	16	14129.1	14111	-115.743	-115.959	75	1.16379	0.00208192	6.2853	-2.40376	0.00272879	4.11377	0.00199818	11.0041	0.00276492	21.2971	0.0761896	-0.814197	30.0588	4.37583	3.74107	0.0676834	14.8861	0.0215712	-0.21875	-0.09	0.126881	STD	0.6132	0.83195	0.776584	-3	3	0.557834	0.557834	1.03528	-0.0214829	0.556029	0.556029	-1.78	0.623763	line2	0.623763	-15	15
2021/06/07 21:59:25	ETH-3	467	STD	19	18618.8	18712.4	-143.988	-143.527	86	1.28834	0.00179787	6.54622	-2.1451	0.00271834	4.23955	0.00174091	11.2663	0.00275441	21.5904	0.0616991	-1.04531	15.4226	2.91516	-11.1568	0.0361131	15.3406	0.0155554	-0.155157	-0.09	0.0873825	STD	0.6132	0.768357	0.806902	-3	3	0.651745	0.651745	1.03528	-0.0214829	0.653253	0.653253	-1.78	0.365096	0.365096	line1	-15	15	-1.75637
2021/06/07 23:45:48	ETH-3	467	STD	22	20932.4	21282.1	-156.227	-157.483	96	1.0756	0.00157308	6.03401	-2.65288	0.0018756	4.02241	0.0015074	10.7517	0.00190062	20.6639	0.0612866	-0.934885	4.8738	1.86632	-20.2242	0.0122243	14.5534	0.0144123	-0.207199	-0.09	0.0886401	STD	0.6132	0.820399	0.791232	-3	3	0.584033	0.584033	1.03528	-0.0214829	0.583153	0.583153	-1.78	0.872884	line2	0.872884	-15	15
2021/06/08 01:27:26	ETH-3	467	STD	25	20563.7	20970	-154.588	-155.964	95	1.28678	0.00186182	6.50929	-2.18171	0.00199398	4.2368	0.00177085	11.2292	0.00202026	21.6294	0.0655624	-0.933936	9.88065	2.27116	-16.4798	0.0244619	15.2843	0.0188477	-0.17174	-0.09	0.111799	STD	0.6132	0.78494	0.800385	-3	3	0.628645	0.628645	1.03528	-0.0214829	0.629338	0.629338	-1.78	0.40171	0.40171	line1	-15	15	-1.6477
2021/06/08 03:11:58	ETH-3	467	STD	28	20980.8	21386.3	-156.256	-157.947	97	1.2304	0.00228729	6.48556	-2.20523	0.00245288	4.18315	0.00218132	11.2053	0.00248553	21.4405	0.0639025	-1.07136	3.63812	2.00385	-22.4583	0.00968821	15.1936	0.0170844	-0.182616	-0.09	0.0992942	STD	0.6132	0.795816	0.782678	-3	3	0.600063	0.600063	1.03528	-0.0214829	0.599748	0.599748	-1.78	0.425228	line2	0.425228	-15	13
2021/06/08 04:58:11	ETH-3	467	STD	31	19408.6	19470.9	-147.882	-147.538	92	1.19135	0.00227661	6.37202	-2.3178	0.00276221	4.14261	0.00220025	11.0912	0.00279993	21.3017	0.0511967	-0.98177	15.6671	3.02699	-10.4805	0.0380352	15.0678	0.022378	-0.154079	-0.09	0.125283	STD	0.6132	0.767279	0.781547	-3	3	0.627468	0.627468	1.03528	-0.0214829	0.62812	0.62812	-1.78	0.537796	0.537796	line1	-15	10	-1.83249
2021/06/08 10:14:03	ETH-3	467	STD	37	16522	16827.5	-129.724	-132.601	82	1.22857	0.00322587	6.30109	-2.38811	0.0039626	4.17502	0.00313714	11.0201	0.00401759	21.4952	0.0774549	-0.651951	39.9343	4.49595	13.2662	0.0951482	15.0475	0.0229745	-0.138227	-0.0620338	0.123972	STD	0.6132	0.751427	0.775203	-3	3	0.636976	0.636976	1.03528	-0.0214829	0.637963	0.637963	-1.78	0.608114	0.608114	line1	-15	5	-1.90368
2021/06/08 13:21:16	ETH-3	467	STD	43	14758.6	14570.3	-118.84	-117.929	75	1.26657	0.00232676	6.46272	-2.22787	0.00301266	4.21624	0.0022466	11.1824	0.00305325	21.8448	0.0586995	-0.630871	21.0999	3.03894	-5.44172	0.0530984	15.2024	0.0194565	-0.185778	-0.09	0.111925	STD	0.6132	0.798978	0.785151	-3	3	0.599372	0.599372	1.03528	-0.0214829	0.599033	0.599033	-1.78	0.447875	0.447875	line1	-15	4	-1.82616
2021/06/08 15:06:58	ETH-3	467	STD	46	18584.8	18704.7	-142.33	-142.595	89	1.31041	0.00181343	6.57922	-2.11238	0.00220668	4.26138	0.00175287	11.2994	0.00223681	21.8059	0.0538062	-0.900178	15.6834	2.72874	-10.9895	0.0401677	15.3588	0.0212655	-0.191846	-0.09	0.119931	STD	0.6132	0.805046	0.802012	-3	0	0.610166	0.610166	1.03528	-0.0214829	0.610207	0.610207	-1.78	0.332376	line2	0.332376	-15	1
2021/06/08 19:19:07	ETH-3	468	STD	4	21337.3	21815.7	-157.518	-159.273	94	1.00857	0.00143699	5.85178	-2.83354	0.00217814	3.95327	0.00139193	10.5686	0.00220706	20.3057	0.0545986	-0.923588	8.25165	1.89038	-16.5086	0.0192598	14.3058	0.0199528	-0.202152	-0.09	0.120975	STD	0.6132	0.815352	0.815352	-3	3	0.6132	0.6132	1.03528	-0.0214829	0.613348	0.613348	-1.78	1.05354	line2	1.05354	-15	15
2021/06/09 00:07:15	ETH-3	468	STD	13	14565.7	14608.6	-117.499	-118.613	90	1.3258	0.00125232	6.58243	-2.1092	0.00272542	4.2759	0.00117726	11.3027	0.00275941	22.2018	0.0680991	-0.519437	43.1633	3.095	15.747	0.0914684	15.3539	0.0225396	-0.214732	-0.0997354	0.136268	STD	0.6132	0.827932	0.828545	-3	3	0.613813	0.613813	1.03528	-0.0214829	0.613983	0.613983	-1.78	0.329202	0.329202	line1	-15	15	-1.52477
2021/06/09 01:50:11	ETH-3	468	STD	16	13596.6	13259.3	-111.748	-109.297	88	1.29742	0.0026401	6.59236	-2.09935	0.00345787	4.24966	0.00255415	11.3126	0.00350462	21.9701	0.0698108	-0.765588	47.27	5.70491	19.7533	0.0997114	15.3351	0.0200957	-0.215958	-0.11987	0.107407	STD	0.6132	0.829158	0.828545	-3	3	0.612587	0.612587	1.03528	-0.0214829	0.612714	0.612714	-1.78	0.31935	line2	0.31935	-15	15
2021/06/09 05:11:59	ETH-3	468	STD	22	14366	14426.9	-116.496	-116.977	83	1.29114	0.00184364	6.53274	-2.15846	0.00233824	4.2417	0.00176142	11.2527	0.00236894	21.7802	0.0692624	-0.832993	41.1939	3.46004	13.9643	0.0866215	15.269	0.0176223	-0.214678	-0.131057	0.105452	STD	0.6132	0.827878	0.807308	-3	3	0.59263	0.59263	1.03528	-0.0214829	0.592053	0.592053	-1.78	0.37846	line2	0.37846	-15	15
2021/06/09 06:53:12	ETH-3	468	STD	25	20357.7	20521	-152.293	-152.702	98	1.28708	0.00191513	6.50863	-2.18237	0.00225054	4.23706	0.00185078	11.2285	0.00228145	21.5569	0.0567094	-1.00356	13.7033	2.56384	-12.7561	0.0311255	15.2821	0.0212817	-0.173538	0.0301215	0.122796	STD	0.6132	0.786738	0.807308	-3	3	0.63377	0.63377	1.03528	-0.0214829	0.634644	0.634644	-1.78	0.402365	0.402365	line1	-15	15	-1.84527
2021/06/09 10:21:58	ETH-3	468	STD	31	21917.8	22372.8	-160.538	-162.201	95	1.34283	0.00232758	6.76085	-1.93232	0.00240533	4.29806	0.00222404	11.4818	0.00243778	22.0773	0.0555475	-0.995098	8.07657	2.53475	-18.7824	0.0195852	15.7003	0.0164669	-0.0706139	-0.0486835	0.0938748	STD	0.6132	0.683814	0.679412	-3	3	0.608799	0.608799	1.03528	-0.0214829	0.608792	0.608792	-1.78	0.152323	0.152323	line1	-15	15	-1.57339
2021/06/09 12:03:31	ETH-3	468	STD	34	18050.1	18140.2	-139.276	-139.103	97	1.505	0.00211232	7.08692	-1.60906	0.00234916	4.46135	0.00203336	11.8094	0.00238134	22.9128	0.0572556	-0.825858	26.9987	2.75248	-1.1735	0.0589366	16.2031	0.0200185	-0.061811	-0.0177422	0.114169	STD	0.6132	0.675011	0.679412	-3	3	0.617601	0.617601	1.03528	-0.0214829	0.617905	0.617905	-1.78	-0.170936	line2	-0.170936	-15	15
2021/06/09 17:09:10	ETH-3	468	STD	43	14718.1	14621.1	-118.356	-117.9	96	1.31204	0.00206394	6.61595	-2.07597	0.00200575	4.26418	0.00195371	11.3363	0.00203192	22.0895	0.0766626	-0.695736	23.3357	3.05773	-3.61232	0.0504689	15.3401	0.0177424	-0.248966	0.118227	0.10966	STD	0.6132	0.862166	0.862166	-3	3	0.6132	0.6132	1.03528	-0.0214829	0.613348	0.613348	-1.78	0.295968	0.295968	line1	-15	15	-1.68722
2021/06/10 13:30:18	ETH-3	469	STD	4	18730.5	18908.2	-143.543	-143.974	92	1.17154	0.00173021	6.19762	-2.49069	0.00185316	4.11799	0.00164588	10.9161	0.0018776	20.9725	0.0508348	-0.957864	24.3232	3.51435	-1.68127	0.053784	14.9352	0.0206882	-0.0891737	-0.09	0.12122	STD	0.6132	0.702374	0.753243	-3	3	0.664069	0.664069	1.03528	-0.0214829	0.666012	0.666012	-1.78	0.710691	line2	0.710691	-4	15
2021/06/10 15:14:06	ETH-3	469	STD	7	18300	18530.6	-140.46	-141.84	93	1.28201	0.00178889	6.538	-2.15325	0.00237056	4.23333	0.0017041	11.258	0.00240131	21.6704	0.0561901	-0.950747	21.5194	2.78964	-5.19695	0.0473148	15.2896	0.0205105	-0.190911	-0.09	0.125138	STD	0.6132	0.804111	0.764578	-3	3	0.573667	0.573667	1.03528	-0.0214829	0.572421	0.572421	-1.78	0.373247	0.373247	line1	-7	15	-1.74752
2021/06/10 16:56:34	ETH-3	469	STD	10	16368.5	16361.6	-129.292	-128.94	88	1.32678	0.00184579	6.66593	-2.02642	0.00214705	4.27972	0.00177004	11.3865	0.00217587	22.0181	0.0489445	-0.864759	14.7935	3.51753	-12.0425	0.0318943	15.482	0.0225881	-0.17405	-0.09	0.134889	STD	0.6132	0.78725	0.813397	-3	3	0.639347	0.639347	1.03528	-0.0214829	0.640418	0.640418	-1.78	0.246422	line2	0.246422	-10	15
2021/06/10 18:38:40	ETH-3	469	STD	13	16059.6	16084	-127.375	-127.349	90	1.29041	0.00122313	6.54406	-2.14724	0.00229167	4.24141	0.00118231	11.2641	0.00232134	21.9029	0.0571958	-0.735453	22.0378	3.40596	-4.71247	0.0473061	15.2587	0.0198503	-0.235629	-0.09	0.117249	STD	0.6132	0.848829	0.818039	-3	3	0.58241	0.58241	1.03528	-0.0214829	0.581473	0.581473	-1.78	0.367235	0.367235	line1	-13	15	-1.74151
2021/06/10 21:50:51	ETH-3	469	STD	19	14265.6	14092.7	-116.015	-114.919	76	1.21031	0.00213057	6.43268	-2.25765	0.00256101	4.16249	0.00204204	11.1521	0.00259517	21.5707	0.063698	-0.839099	21.401	3.8243	-5.03308	0.0458607	15.0471	0.0218564	-0.254074	0.0697903	0.130472	STD	0.6132	0.867274	0.84375	-3	2	0.589675	0.589675	1.03528	-0.0214829	0.588994	0.588994	-1.78	0.477651	0.477651	line1	-15	15	-1.85192
2021/06/10 23:17:49	ETH-3	469	STD	22	18085	18228.8	-139.263	-139.971	86	1.28711	0.00170809	6.50386	-2.18709	0.00265513	4.23692	0.0016617	11.2237	0.00269055	21.4894	0.0559071	-1.06009	18.3759	3.27563	-8.19621	0.0398316	15.2432	0.0194613	-0.207025	#DIV/0!	0.107172	STD	0.6132	0.820225	0.84375	-3	0	0.636725	0.636725	1.03528	-0.0214829	0.637703	0.637703	-1.78	0.407089	line2	0.407089	-15	15
2021/06/11 21:26:06	ETH-3	470	STD	7	15540.5	15588.7	-123.531	-123.998	78	1.34125	0.00179286	6.63211	-2.05995	0.00237228	4.2921	0.00171648	11.3526	0.00240346	21.3635	0.0777068	-1.43773	24.4435	3.88901	-2.59493	0.0648017	15.3602	0.0208159	-0.273731	-389.132	0.120132	STD	0.6132	0.886931	0.869737	-3	3	0.596006	0.596006	1.03528	-0.0214829	0.595547	0.595547	-1.78	0.279951	0.279951	line1	-15	15	-1.70533
2021/06/11 23:03:24	ETH-3	470	STD	10	19088.9	19529.2	-145.08	-147.493	90	1.27214	0.00154018	6.56953	-2.12199	0.00264553	4.22517	0.00149533	11.2896	0.00268028	21.5193	0.0600117	-1.16098	16.3293	2.38146	-10.3036	0.0420626	15.2631	0.0130004	-0.239342	-291.676	0.0728465	STD	0.6132	0.852542	0.869737	-3	3	0.630394	0.630394	1.03528	-0.0214829	0.631149	0.631149	-1.78	0.341991	line2	0.341991	-15	15
2021/06/12 02:13:29	ETH-3	470	STD	16	17571.9	17746.6	-135.812	-136.754	84	1.28658	0.00216863	6.64644	-2.04574	0.00208636	4.24138	0.00207265	11.3669	0.00211487	21.8436	0.0734646	-0.996525	24.3022	3.60119	-2.70667	0.0592861	15.4057	0.0201986	-0.190697	-0.0964278	0.117626	STD	0.6132	0.803897	0.803897	-3	3	0.6132	0.6132	1.03528	-0.0214829	0.613348	0.613348	-1.78	0.265744	line2	0.265744	-15	15
2021/06/12 05:24:13	ETH-3	470	STD	22	18755.6	18764.5	-142.926	-143.252	87	1.30848	0.00187463	6.64284	-2.04932	0.00225668	4.26178	0.00179243	11.3633	0.00228655	21.7045	0.072428	-1.12542	15.3477	2.81205	-11.4394	0.03654	15.3665	0.019285	-0.246729	-0.09	0.116271	STD	0.6132	0.859929	0.859929	-3	3	0.6132	0.6132	1.03528	-0.0214829	0.613348	0.613348	-1.78	0.269315	line2	0.269315	-15	15
2021/06/14 19:20:14	ETH-3	471	STD	4	11595.2	11373.4	-97.231	-95.2955	78	1.44871	0.0015041	6.94605	-1.74872	0.00264095	4.40371	0.0014403	11.6679	0.00267486	22.4848	0.076749	-0.964493	32.6494	2.95207	4.65987	0.0815429	15.7797	0.0231246	-0.281816	-0.09	0.138292	STD	0.6132	0.895016	0.892908	-3	3	0.611093	0.611093	1.03528	-0.0214829	0.611167	0.611167	-1.78	-0.031283	line2	-0.031283	-15	15
2021/06/14 21:03:02	ETH-3	471	STD	7	10079	9886.57	-86.166	-84.9125	95	1.41986	0.00185215	6.91729	-1.77723	0.00264366	4.37568	0.00173923	11.639	0.00267669	22.1608	0.0851746	-1.22401	27.524	4.2234	-0.240677	0.0693564	15.7261	0.0237178	-0.277601	-0.09	0.147154	STD	0.6132	0.890801	0.882344	-3	3	0.604744	0.604744	1.03528	-0.0214829	0.604594	0.604594	-1.78	-0.00277161	-0.00277161	line1	-15	15	-1.7402
2021/06/14 22:41:39	ETH-3	471	STD	10	15885.4	15954.1	-125.043	-125.305	81	1.41402	0.00150581	6.93461	-1.76006	0.00235615	4.37081	0.00140849	11.6564	0.00238535	22.5595	0.0557212	-0.868719	30.1708	3.0036	2.30604	0.0694937	15.7683	0.0181969	-0.248016	-0.09	0.114053	STD	0.6132	0.861216	0.85848	-3	3	0.610463	0.610463	1.03528	-0.0214829	0.610515	0.610515	-1.78	-0.0199444	line2	-0.0199444	-15	15
2021/06/15 00:27:28	ETH-3	471	STD	13	20336	20457.2	-149.966	-151.226	92	1.467	0.00158687	6.91331	-1.78118	0.00226001	4.41971	0.00152449	11.6351	0.00228971	22.5276	0.05055	-0.857842	15.3212	2.03516	-12.1525	0.0363886	15.8367	0.0158292	-0.210222	-0.09	0.0961508	STD	0.6132	0.823422	0.831328	-3	3	0.621105	0.621105	1.03528	-0.0214829	0.621532	0.621532	-1.78	0.0011808	0.0011808	line1	-15	15	-1.74505
2021/06/15 02:09:46	ETH-3	471	STD	16	20381.4	20596.1	-151.019	-151.995	96	1.42859	0.00221941	6.85405	-1.83993	0.0027368	4.38166	0.00214751	11.5755	0.00277419	22.1694	0.0540764	-1.09024	23.2472	2.91197	-4.28587	0.054291	15.7525	0.0173854	-0.196144	-0.09	0.0998273	STD	0.6132	0.809344	0.821072	-3	3	0.624928	0.624928	1.03528	-0.0214829	0.62549	0.62549	-1.78	0.059929	line2	0.059929	-15	15
2021/06/15 03:48:52	ETH-3	471	STD	19	11703.9	11539.8	-97.513	-96.5785	79	1.46138	0.00225857	6.89307	-1.80125	0.00332978	4.41374	0.00218589	11.6148	0.00337407	22.3608	0.0949133	-0.980675	37.2979	4.79573	9.27501	0.0857926	15.8033	0.0174663	-0.21725	-0.09	0.0997528	STD	0.6132	0.83045	0.816514	-3	3	0.599265	0.599265	1.03528	-0.0214829	0.598921	0.598921	-1.78	0.0212458	0.0212458	line1	-15	15	-1.78819
2021/06/15 05:32:24	ETH-3	471	STD	22	15383	15461.9	-121.348	-122.181	84	1.35001	0.00283057	6.56634	-2.12515	0.00585147	4.29803	0.00281102	11.2866	0.00592897	21.8487	0.0604322	-0.832959	38.8694	4.50039	11.5724	0.0859942	15.3796	0.0217025	-0.196549	-0.09	0.113622	STD	0.6132	0.809749	0.813433	-3	3	0.616883	0.616883	1.03528	-0.0214829	0.617162	0.617162	-1.78	0.345146	line2	0.345146	-15	15
2021/06/15 07:11:45	ETH-3	471	STD	25	19085.3	19546.7	-143.585	-145.922	97	1.42344	0.00140131	6.88166	-1.81256	0.00252053	4.37779	0.00134782	11.6032	0.00255305	22.524	0.0552108	-0.798433	15.9793	1.92844	-11.4069	0.0364919	15.7852	0.0152298	-0.186899	-0.09	0.0982541	STD	0.6132	0.800099	0.804924	-3	3	0.618025	0.618025	1.03528	-0.0214829	0.618344	0.618344	-1.78	0.0325571	0.0325571	line1	-15	15	-1.78678
2021/06/15 15:01:37	ETH-3	471	STD	37	19495.9	19503.2	-145.643	-145.734	94	1.44081	0.00194305	6.86594	-1.82813	0.00311464	4.39352	0.00190616	11.5875	0.00315665	22.4569	0.059133	-0.832882	37.5417	2.67141	9.58783	0.0874427	15.7858	0.0182319	-0.1872	-0.0848019	0.10264	STD	0.6132	0.8004	0.792612	-3	3	0.605411	0.605411	1.03528	-0.0214829	0.605285	0.605285	-1.78	0.0481337	0.0481337	line1	-15	15	-1.82068
2021/06/15 16:42:06	ETH-3	471	STD	40	17056.3	17274.2	-131.68	-132.857	96	1.41207	0.00140901	6.90591	-1.78851	0.002656	4.36798	0.00135174	11.6276	0.00269004	22.8028	0.0627211	-0.574031	43.2419	1.90181	15.0835	0.0989284	15.8145	0.0172174	-0.171623	-0.11801	0.101795	STD	0.6132	0.784823	0.789727	-3	3	0.618104	0.618104	1.03528	-0.0214829	0.618426	0.618426	-1.78	0.00850866	line2	0.00850866	-15	15
2021/06/15 18:25:25	ETH-3	471	STD	43	19579.3	19898.8	-145.888	-147.764	97	1.44654	0.00157494	6.96424	-1.73068	0.00250162	4.4023	0.00151502	11.6862	0.00253423	22.7085	0.0573191	-0.782029	30.8067	2.70654	2.83292	0.0719536	15.9091	0.0188262	-0.170758	0.156371	0.108024	STD	0.6132	0.783958	0.815777	-3	3	0.645019	0.645019	1.03528	-0.0214829	0.64629	0.64629	-1.78	-0.049319	-0.049319	line1	-15	15	-1.72825
2021/06/15 20:05:43	ETH-3	471	STD	46	21383.4	21959.7	-155.461	-158.27	97	1.43088	0.00163029	6.89883	-1.79553	0.00241851	4.38536	0.00155969	11.6205	0.00244989	22.4594	0.0533939	-0.895646	24.0711	1.90471	-3.57468	0.0572417	15.7304	0.0137985	-0.265351	#DIV/0!	0.0803506	STD	0.6132	0.878551	0.831255	-3	0	0.565904	0.565904	1.03528	-0.0214829	0.564384	0.564384	-1.78	0.0155304	line2	0.0155304	-15	15
2021-06-16 11:44:29	ETH-3	472	STD	1	19589.6	19636.2	-144.871	-145.621	87	1.51444	0.00283109	7.04383	-1.65178	0.00366344	4.46869	0.00276648	11.7662	0.00371439	22.8502	0.0579078	-0.801661	42.4713	4.81751	13.9506	0.0985977	16.1981	0.0248811	-0.0322559	-0.09	0.12727	STD	0.6132	0.645456	0.70561	0	3	0.673354	0.673354	1.03528	-0.0214829	0.675625	0.675625	-1.78	-0.12822	-0.12822	line1	-15	15	-1.67733
2021-06-16 13:27:34	ETH-3	472	STD	4	19775.4	19756	-145.903	-146.166	91	1.52434	0.00167004	7.11831	-1.57794	0.00228152	4.48056	0.00159979	11.841	0.00231145	22.842	0.067319	-0.957293	17.4085	2.77742	-10.5815	0.0415806	16.1621	0.0203382	-0.152564	-0.09	0.120272	STD	0.6132	0.765764	0.70561	-3	3	0.553046	0.553046	1.03528	-0.0214829	0.551072	0.551072	-1.78	-0.202055	line2	-0.202055	-15	15
2021-06-16 16:54:16	ETH-3	472	STD	10	17192.5	17370	-131.594	-132.927	83	1.57804	0.0024939	7.11907	-1.5772	0.00242859	4.5309	0.00238328	11.8419	0.00246168	22.8618	0.0534638	-0.939698	40.8852	4.47437	12.1932	0.095414	16.2415	0.0205634	-0.126977	-0.09	0.116769	STD	0.6132	0.740177	0.799263	-3	3	0.672286	0.672286	1.03528	-0.0214829	0.674519	0.674519	-1.78	-0.202803	line2	-0.202803	-15	15
2021-06-16 18:40:47	ETH-3	472	STD	13	20783.9	21191.8	-151.634	-153.418	94	1.5115	0.00196878	7.08138	-1.61456	0.00197827	4.46725	0.00187569	11.8039	0.00200473	22.6801	0.0495521	-1.04227	11.1366	2.14922	-16.596	0.0274318	16.0174	0.0174466	-0.245149	-0.09	0.104482	STD	0.6132	0.858349	0.819794	-3	3	0.574645	0.574645	1.03528	-0.0214829	0.573433	0.573433	-1.78	-0.165444	-0.165444	line1	-15	15	-1.68366
2021-06-16 20:24:22	ETH-3	472	STD	16	15448.5	15463.8	-120.706	-120.889	78	1.50668	0.00213749	7.07278	-1.62308	0.00228537	4.46243	0.00203373	11.7953	0.00231554	22.8914	0.0718807	-0.81878	35.6036	3.42428	7.22188	0.0823287	16.0013	0.0167846	-0.247656	-0.09	0.0993367	STD	0.6132	0.860856	0.844768	-3	3	0.597112	0.597112	1.03528	-0.0214829	0.596692	0.596692	-1.78	-0.156921	line2	-0.156921	-15	15
2021-06-16 22:09:22	ETH-3	472	STD	19	16713.7	16940.6	-128.582	-130.049	84	1.48323	0.0018277	7.03749	-1.65807	0.00180578	4.43923	0.0017167	11.7598	0.00182848	22.7668	0.0622757	-0.870402	20.5106	2.84055	-7.36444	0.0472258	15.9886	0.019977	-0.201898	-0.09	0.11717	STD	0.6132	0.815098	0.824262	-3	3	0.622364	0.622364	1.03528	-0.0214829	0.622836	0.622836	-1.78	-0.121931	-0.121931	line1	-15	15	-1.79832
2021-06-16 23:51:59	ETH-3	472	STD	22	16690.9	16777.3	-128.897	-129.476	77	1.51777	0.00192917	7.08175	-1.61419	0.00221133	4.47314	0.00183078	11.8043	0.00224005	22.7599	0.0625017	-0.965051	22.2123	3.38742	-5.83102	0.0509175	16.0865	0.0175805	-0.183633	-0.09	0.104832	STD	0.6132	0.796833	0.805708	-3	3	0.622075	0.622075	1.03528	-0.0214829	0.622537	0.622537	-1.78	-0.165809	line2	-0.165809	-15	15
2021-06-17 01:35:32	ETH-3	472	STD	25	15157.7	15334.8	-119.56	-120.411	90	1.53521	0.00153667	7.13014	-1.56622	0.00232388	4.49116	0.00143563	11.8529	0.0023526	23.0518	0.0633939	-0.775889	26.259	3.55364	-2.00858	0.0596533	16.1448	0.0161089	-0.191994	-0.09	0.0993767	STD	0.6132	0.805194	0.810386	-3	3	0.618392	0.618392	1.03528	-0.0214829	0.618724	0.618724	-1.78	-0.213781	-0.213781	line1	-15	15	-1.71145
2021-06-17 03:21:50	ETH-3	472	STD	28	16102.6	16240	-125.607	-126.505	78	1.4987	0.00118255	7.09955	-1.59654	0.0019993	4.45589	0.00111914	11.8221	0.00202455	22.9347	0.0660753	-0.829482	25.92	3.28331	-2.24119	0.0589441	16.0533	0.0183236	-0.215931	-0.09	0.113104	STD	0.6132	0.829131	0.815344	-3	3	0.599413	0.599413	1.03528	-0.0214829	0.599075	0.599075	-1.78	-0.18346	line2	-0.18346	-15	15
2021-06-17 05:08:11	ETH-3	472	STD	31	16895.3	16970.2	-130.179	-130.593	84	1.51567	0.00183586	7.12045	-1.57582	0.0024518	4.47251	0.00176235	11.8431	0.00248421	23.0109	0.0683576	-0.796618	26.4769	3.5978	-1.75825	0.0604383	16.1091	0.0212357	-0.198507	-0.09	0.129721	STD	0.6132	0.811707	0.805316	-3	3	0.606809	0.606809	1.03528	-0.0214829	0.606732	0.606732	-1.78	-0.204176	-0.204176	line1	-15	15	-1.71702
2021-06-17 06:53:10	ETH-3	472	STD	34	17788.8	17923.4	-134.915	-135.745	87	1.50429	0.00178593	7.06683	-1.62898	0.00215233	4.45999	0.00171289	11.7893	0.00218108	22.6467	0.0573486	-1.04595	22.1898	2.95532	-5.81019	0.0513033	16.08	0.019474	-0.16191	-0.09	0.112224	STD	0.6132	0.77511	0.778124	-3	3	0.616214	0.616214	1.03528	-0.0214829	0.616469	0.616469	-1.78	-0.15102	line2	-0.15102	-15	15
2021-06-17 08:40:22	ETH-3	472	STD	37	21767.5	21877.5	-157.174	-157.353	96	1.51185	0.00169199	7.08612	-1.60985	0.00225864	4.46774	0.00162118	11.8087	0.00228835	22.7389	0.0610095	-0.994228	14.0304	2.10584	-13.7911	0.0339721	16.1353	0.0180185	-0.134356	-0.09	0.102717	STD	0.6132	0.747556	0.761333	-3	3	0.626977	0.626977	1.03528	-0.0214829	0.627612	0.627612	-1.78	-0.170145	-0.170145	line1	-15	15	-1.77312
2021-06-18 05:44:38	ETH-3	473	STD	21	19801.4	19877.8	-146.179	-146.41	91	1.53253	0.00229134	7.09294	-1.60309	0.00231429	4.48735	0.00220207	11.8155	0.00234639	22.7593	0.0649221	-0.987866	30.2403	3.52592	1.93942	0.0733699	16.1567	0.0176657	-0.140123	-0.0822924	0.101965	STD	0.6132	0.753323	0.771483	-3	3	0.63136	0.63136	1.03528	-0.0214829	0.632149	0.632149	-1.78	-0.176905	-0.176905	line1	-15	15	-1.69686
2021-06-18 07:28:09	ETH-3	473	STD	24	15410.3	15575.5	-121.207	-122.058	77	1.524	0.00191413	7.10735	-1.58881	0.00204251	4.47986	0.00179208	11.83	0.00206783	23.0738	0.0715987	-0.70923	37.9395	3.31441	9.40721	0.0872748	16.1262	0.016584	-0.176443	-0.110561	0.101887	STD	0.6132	0.789643	0.780211	-3	3	0.603768	0.603768	1.03528	-0.0214829	0.603583	0.603583	-1.78	-0.19119	line2	-0.19119	-15	15
2021-06-18 09:12:46	ETH-3	473	STD	27	17487.9	17496.1	-133.939	-133.5	85	1.53728	0.00212996	7.10442	-1.59172	0.00283834	4.4922	0.00204397	11.8271	0.00287583	22.8018	0.0700222	-0.969091	29.6085	3.47399	1.29741	0.0694591	16.128	0.0178939	-0.184467	0.144219	0.106027	STD	0.6132	0.797667	0.788908	-3	3	0.604442	0.604442	1.03528	-0.0214829	0.604281	0.604281	-1.78	-0.188284	-0.188284	line1	-15	15	-1.68548
2021-06-18 10:56:36	ETH-3	473	STD	30	20464.6	20873.7	-150.528	-151.732	92	1.47064	0.00172883	7.0028	-1.69246	0.00241483	4.42623	0.001659	11.7249	0.00244656	22.4613	0.0559829	-1.10006	17.3797	2.16628	-10.3292	0.0420171	15.9769	0.0183407	-0.166215	#DIV/0!	0.107471	STD	0.6132	0.779415	0.788541	-3	0	0.622326	0.622326	1.03528	-0.0214829	0.622796	0.622796	-1.78	-0.0875439	line2	-0.0875439	-15	15
2021-06-19 07:12:21	ETH-3	474	STD	34	20151.9	20292.5	-148.652	-148.242	105	1.53514	0.0019254	7.15506	-1.54151	0.00242696	4.49196	0.00186474	11.8779	0.00246008	22.8806	0.0604977	-0.992531	42.9256	3.2673	14.1485	0.0949415	16.1919	0.0177577	-0.170733	-0.0836385	0.0990002	STD	0.6132	0.783933	0.783933	-3	3	0.6132	0.6132	1.03528	-0.0214829	0.613348	0.613348	-1.78	-0.238487	line2	-0.238487	-15	15
2021-06-19 10:39:53	ETH-3	474	STD	40	20974.6	21335	-152.717	-153.607	96	1.4968	0.00154653	7.08808	-1.60791	0.00209691	4.45371	0.00146316	11.8106	0.00212361	22.7384	0.0565408	-0.998466	28.9071	2.35903	0.688553	0.0641638	16.1416	0.0159024	-0.115591	-4.76293	0.092741	STD	0.6132	0.728791	0.728791	-3	3	0.6132	0.6132	1.03528	-0.0214829	0.613348	0.613348	-1.78	-0.172089	line2	-0.172089	-15	15
2021-06-19 13:50:50	ETH-3	474	STD	46	17492.7	17660.5	-132.86	-133.803	95	1.55247	0.00179995	7.13485	-1.56155	0.0022604	4.5075	0.00172637	11.8576	0.00229043	22.9103	0.060843	-0.92357	34.5001	3.01279	5.9787	0.0746214	16.1813	0.0212301	-0.177469	#DIV/0!	0.121752	STD	0.6132	0.790669	0.790669	-3	0	0.6132	0.6132	1.03528	-0.0214829	0.613348	0.613348	-1.78	-0.218451	line2	-0.218451	-15	15
2021-06-21 12:16:06	ETH-3	475	STD	1	12708.2	12389	-100.94	-99.2555	90	1.37855	0.00135735	7.11971	-1.57656	0.00278091	4.344	0.0013043	11.8421	0.00281645	21.8751	0.0781258	-1.9039	49.0045	6.49415	20.2904	0.092197	16.0352	0.0222327	-0.138242	-0.09	0.13113	STD	0.6132	0.751442	0.718445	0	3	0.580203	0.580203	1.03528	-0.0214829	0.579187	0.579187	-1.78	-0.203438	-0.203438	line1	-15	15	-1.79619
2021-06-21 13:58:55	ETH-3	475	STD	4	19631.9	19819.9	-143.475	-144.511	90	1.69325	0.00204371	7.36336	-1.33501	0.00193125	4.64735	0.00195085	12.0873	0.00195757	23.2084	0.0572939	-1.08584	47.1242	3.59191	17.6497	0.091397	16.661	0.0202944	-0.0722479	-0.09	0.117665	STD	0.6132	0.685448	0.737636	-3	3	0.665388	0.665388	1.03528	-0.0214829	0.667378	0.667378	-1.78	-0.444987	line2	-0.444987	-15	15
2021-06-21 15:42:40	ETH-3	475	STD	7	16172	16037.2	-123.62	-122.839	79	1.54779	0.00139699	7.13847	-1.55796	0.00228654	4.50323	0.00132166	11.8613	0.00231543	23.0699	0.0664877	-0.774819	30.9291	3.51908	2.50369	0.0601836	16.1953	0.0168222	-0.162819	-0.09	0.10413	STD	0.6132	0.776019	0.75164	-3	3	0.588821	0.588821	1.03528	-0.0214829	0.58811	0.58811	-1.78	-0.222041	-0.222041	line1	-15	15	-1.69037
2021-06-21 17:22:26	ETH-3	475	STD	10	16376.2	16549.3	-125.508	-125.89	79	1.52534	0.00175464	7.18103	-1.51577	0.00224799	4.48367	0.00164497	11.9039	0.00227599	23.1172	0.0574817	-0.812864	39.3165	3.093	10.5971	0.0771764	16.1993	0.0148113	-0.180254	-0.09	0.0922925	STD	0.6132	0.793454	0.778055	-3	3	0.597801	0.597801	1.03528	-0.0214829	0.597406	0.597406	-1.78	-0.264231	line2	-0.264231	-15	15
2021-06-21 19:08:07	ETH-3	475	STD	13	18469.9	18664.3	-136.485	-137.868	83	1.54183	0.00162018	7.14993	-1.5466	0.00202603	4.49804	0.00153107	11.8728	0.00205185	22.9876	0.0511345	-0.877915	29.8673	2.57107	1.45452	0.059195	16.2128	0.020456	-0.151493	-0.09	0.11868	STD	0.6132	0.764693	0.817476	-3	3	0.665983	0.665983	1.03528	-0.0214829	0.667994	0.667994	-1.78	-0.233398	-0.233398	line1	-15	15	-1.6898
2021-06-21 20:56:00	ETH-3	475	STD	16	16005.3	15844.1	-122.806	-121.928	79	1.50838	0.0022489	7.10008	-1.59602	0.00274363	4.46497	0.00214708	11.8227	0.00277973	22.997	0.0795248	-0.769706	38.704	4.15395	10.1805	0.075576	15.9971	0.0223238	-0.281081	-0.09	0.129748	STD	0.6132	0.894281	0.825229	-3	3	0.544148	0.544148	1.03528	-0.0214829	0.541861	0.541861	-1.78	-0.183979	line2	-0.183979	-15	15
2021-06-21 22:37:00	ETH-3	475	STD	19	17230.5	17217	-130.302	-129.872	83	1.54633	0.00204192	7.11978	-1.57649	0.0021803	4.50121	0.00195671	11.8425	0.00220988	22.9875	0.0540824	-0.818271	28.2048	3.12409	-0.106961	0.0549759	16.1333	0.01777	-0.203515	-0.09	0.10645	STD	0.6132	0.816715	0.854071	-3	3	0.650556	0.650556	1.03528	-0.0214829	0.652023	0.652023	-1.78	-0.203508	-0.203508	line1	-15	15	-1.70764
2021-06-22 00:21:27	ETH-3	475	STD	22	16881.3	17044.5	-128.296	-129.468	82	1.5233	0.00112281	7.11513	-1.5811	0.00229454	4.47947	0.00105273	11.8378	0.00232308	23.0811	0.0645353	-0.717542	25.6909	2.84024	-2.5194	0.0501294	16.0709	0.0144295	-0.238018	-0.09	0.0878377	STD	0.6132	0.851218	0.831759	-3	3	0.593742	0.593742	1.03528	-0.0214829	0.593204	0.593204	-1.78	-0.198902	line2	-0.198902	-15	15
2021-06-22 02:05:08	ETH-3	475	STD	25	15941.8	16044.7	-123.244	-123.636	78	1.54354	0.00183931	7.11338	-1.58283	0.0025346	4.49838	0.00173964	11.8361	0.00256682	23.1229	0.0711605	-0.67325	26.812	3.79744	-1.44609	0.052	16.1132	0.0179402	-0.214146	-0.09	0.106899	STD	0.6132	0.827346	0.818764	-3	3	0.604618	0.604618	1.03528	-0.0214829	0.604464	0.604464	-1.78	-0.197165	-0.197165	line1	-15	15	-1.72012
2021-06-22 03:48:37	ETH-3	475	STD	28	17146.2	17191.2	-129.714	-130.155	82	1.53495	0.00180624	7.09207	-1.60396	0.00207894	4.48959	0.00172508	11.8147	0.00210651	22.9855	0.0720623	-0.765153	27.1469	3.41058	-1.06941	0.0532402	16.1333	0.0179691	-0.164528	-0.09	0.107623	STD	0.6132	0.777728	0.802537	-3	3	0.638009	0.638009	1.03528	-0.0214829	0.639032	0.639032	-1.78	-0.176039	line2	-0.176039	-15	15
2021-06-22 07:02:04	ETH-3	475	STD	34	19062.5	19392.5	-141.249	-142.505	88	1.53896	0.00169037	7.14906	-1.54746	0.00180491	4.49532	0.00162001	11.8719	0.00182941	22.8972	0.0460406	-0.964404	13.1717	2.60094	-14.7762	0.0266782	16.1604	0.0186169	-0.199338	-0.854855	0.108116	STD	0.6132	0.812538	0.781572	-3	3	0.582234	0.582234	1.03528	-0.0214829	0.58129	0.58129	-1.78	-0.232537	line2	-0.232537	-15	15
2021-06-22 08:50:56	ETH-3	475	STD	37	19704.9	19916.6	-144.841	-145.105	90	1.53964	0.00170289	7.16939	-1.52731	0.00249725	4.49667	0.00163973	11.8923	0.00253013	22.9747	0.0600868	-0.929012	14.9667	2.73559	-13.0713	0.030751	16.2449	0.0203077	-0.137406	-0.10927	0.118954	STD	0.6132	0.750606	0.781572	-3	3	0.644166	0.644166	1.03528	-0.0214829	0.645407	0.645407	-1.78	-0.252694	-0.252694	line1	-15	15	-1.65074
2021-06-22 12:12:00	ETH-3	475	STD	43	18946	19076.5	-140.488	-140.966	88	1.46463	0.00193217	7.0072	-1.68809	0.00224918	4.42075	0.00185827	11.7293	0.00227965	22.7264	0.0560614	-0.849724	17.663	2.96979	-10.0566	0.0360771	16.0451	0.0185757	-0.0977151	-249.871	0.105523	STD	0.6132	0.710915	0.727098	-3	3	0.629383	0.629383	1.03528	-0.0214829	0.630102	0.630102	-1.78	-0.0919081	-0.0919081	line1	-15	15	-1.87403
2021-06-22 13:54:26	ETH-3	475	STD	46	21256.9	21551	-152.742	-153.773	94	1.51949	0.00247678	7.08692	-1.60907	0.00299772	4.47493	0.00239843	11.8095	0.00303892	22.8951	0.0470661	-0.843251	35.879	3.96536	7.44803	0.0757423	16.1479	0.0195681	-0.130081	#DIV/0!	0.107325	STD	0.6132	0.743281	0.727098	-3	0	0.597017	0.597017	1.03528	-0.0214829	0.596594	0.596594	-1.78	-0.170931	line2	-0.170931	-15	15
2021-06-22 16:32:46	ETH-3	476	STD	1	20077.1	20208.7	-146.134	-147.528	84	1.53522	0.00271762	7.10384	-1.59229	0.00373927	4.49025	0.00265084	11.8265	0.00379042	22.9409	0.0586335	-0.832137	40.1494	5.4534	11.5505	0.091998	16.1359	0.0213811	-0.174172	-0.09	0.111573	STD	0.6132	0.787372	0.820148	0	3	0.645976	0.645976	1.03528	-0.0214829	0.64728	0.64728	-1.78	-0.187708	-0.187708	line1	-15	15	-1.77567
2021-06-22 18:16:22	ETH-3	476	STD	4	12311	12075.4	-99.743	-98.2695	75	1.62997	0.00341874	7.24428	-1.45306	0.00731391	4.58391	0.00342375	11.9676	0.00741125	23.1631	0.0815518	-0.893884	17.8608	4.71865	-10.4951	0.0410281	16.3064	0.0222753	-0.239724	-0.09	0.123023	STD	0.6132	0.852924	0.830161	-3	3	0.590437	0.590437	1.03528	-0.0214829	0.589782	0.589782	-1.78	-0.326937	line2	-0.326937	-15	15
2021-06-22 20:06:37	ETH-3	476	STD	7	20741.3	21193.2	-149.975	-151.53	90	1.54074	0.00173328	7.12778	-1.56855	0.00189784	4.49626	0.00163704	11.8505	0.00192216	22.7053	0.0589789	-1.10965	3.90116	2.10983	-23.7513	0.00968573	16.1021	0.0195445	-0.236985	-0.09	0.118471	STD	0.6132	0.850185	0.852281	-3	3	0.615295	0.615295	1.03528	-0.0214829	0.615518	0.615518	-1.78	-0.211445	-0.211445	line1	-15	15	-1.72725
2021-06-22 21:53:10	ETH-3	476	STD	10	18386.4	18727.1	-137.092	-138.192	86	1.54354	0.00142678	7.16877	-1.52793	0.00191387	4.5003	0.00133816	11.8917	0.00193772	22.8088	0.0581881	-1.08989	14.0132	2.75637	-14.0008	0.0323766	16.1433	0.0157694	-0.240533	-0.09	0.0953939	STD	0.6132	0.853733	0.851034	-3	3	0.610501	0.610501	1.03528	-0.0214829	0.610554	0.610554	-1.78	-0.252075	line2	-0.252075	-15	15
2021-06-22 23:41:44	ETH-3	476	STD	13	21133.4	21692.7	-152.371	-154.06	94	1.52687	0.00203513	7.08914	-1.60686	0.00218268	4.48192	0.00194481	11.8117	0.00221197	22.441	0.0506857	-1.2912	4.62369	1.83763	-22.9602	0.0112486	16.0498	0.0186029	-0.235984	-0.09	0.117284	STD	0.6132	0.849184	0.841214	-3	3	0.60523	0.60523	1.03528	-0.0214829	0.605097	0.605097	-1.78	-0.173139	-0.173139	line1	-15	15	-1.74498
2021-06-23 01:31:20	ETH-3	476	STD	16	23073.7	23653.4	-162.093	-164.391	94	1.50437	0.00200359	7.02586	-1.66959	0.00248893	4.45864	0.00193839	11.7482	0.00252288	22.3575	0.0489525	-1.2473	-0.471351	2.57066	-27.7716	0.00023779	15.9917	0.0177507	-0.207524	-0.09	0.103833	STD	0.6132	0.820724	0.80911	-3	3	0.601586	0.601586	1.03528	-0.0214829	0.601325	0.601325	-1.78	-0.110406	line2	-0.110406	-15	15
2021-06-23 03:13:47	ETH-3	476	STD	19	21275.4	21672.1	-153.661	-154.258	93	1.52293	0.00154317	7.06848	-1.62735	0.00169443	4.47751	0.00148691	11.791	0.00171777	22.4929	0.0596573	-1.19953	4.04045	2.28409	-23.4836	0.0100174	16.118	0.0193877	-0.144223	-0.09	0.11627	STD	0.6132	0.757423	0.794935	-3	3	0.650712	0.650712	1.03528	-0.0214829	0.652183	0.652183	-1.78	-0.152652	-0.152652	line1	-15	15	-1.75554
2021-06-23 05:01:30	ETH-3	476	STD	22	22687.8	23243.7	-160.218	-161.954	95	1.50642	0.00136108	7.03977	-1.65581	0.00241561	4.46104	0.00132579	11.7621	0.00244739	22.3937	0.0473894	-1.23951	0.94085	1.97978	-26.4266	0.00308675	16.0223	0.0176432	-0.193457	-0.09	0.103076	STD	0.6132	0.806657	0.786817	-3	3	0.59336	0.59336	1.03528	-0.0214829	0.592808	0.592808	-1.78	-0.124192	line2	-0.124192	-15	15
2021-06-23 06:44:41	ETH-3	476	STD	25	28062.7	29107	-185.456	-188.74	78	1.49817	0.00260569	6.97748	-1.71756	0.00379238	4.45114	0.00255204	11.6996	0.0038442	22.0177	0.0504712	-1.48333	-8.12948	1.38213	-35.1216	-0.0196702	15.9606	0.0148687	-0.18317	-0.09	0.0766096	STD	0.6132	0.79637	0.801957	-3	3	0.618788	0.618788	1.03528	-0.0214829	0.619133	0.619133	-1.78	-0.0624377	-0.0624377	line1	-15	15	-1.84765
2021-06-23 08:32:55	ETH-3	476	STD	28	22057.3	22436.3	-157.368	-158.212	94	1.51344	0.00177068	7.08917	-1.60684	0.00226524	4.46933	0.00168989	11.8117	0.00229486	22.599	0.0490167	-1.13684	3.07049	2.2537	-24.4579	0.00802271	16.0838	0.0217669	-0.189645	-0.09	0.125994	STD	0.6132	0.802845	0.799608	-3	3	0.609962	0.609962	1.03528	-0.0214829	0.609996	0.609996	-1.78	-0.173165	line2	-0.173165	-15	15
2021-06-23 13:38:22	ETH-3	476	STD	37	14673.1	14530.8	-114.997	-114.243	75	1.5558	0.00171594	7.13733	-1.55909	0.00297303	4.5107	0.00163121	11.8601	0.00301081	22.9301	0.0657111	-0.909105	25.5967	4.10096	-2.68772	0.0582361	16.1175	0.0232657	-0.245941	-0.212844	0.137127	STD	0.6132	0.859141	0.825727	-3	3	0.579786	0.579786	1.03528	-0.0214829	0.578756	0.578756	-1.78	-0.22091	-0.22091	line1	-15	15	-1.66173
2021-06-23 15:22:55	ETH-3	476	STD	40	18937.3	19342.6	-140.179	-141.825	88	1.4996	0.00139681	7.05211	-1.64357	0.00200032	4.45508	0.00133905	11.7745	0.00202648	22.5677	0.0588209	-1.09393	7.73111	3.32424	-19.8395	0.0183465	16.0428	0.0168056	-0.179114	-0.130885	0.0994385	STD	0.6132	0.792314	0.819814	-3	3	0.640701	0.640701	1.03528	-0.0214829	0.641819	0.641819	-1.78	-0.136428	line2	-0.136428	-15	15
2021-06-23 17:10:07	ETH-3	476	STD	43	19482.3	19792.6	-143.161	-144.387	89	1.52242	0.00213009	7.08354	-1.61241	0.00252302	4.47755	0.00203799	11.8061	0.00255655	22.7264	0.0648689	-1.00132	14.4695	2.85264	-13.3696	0.0339346	16.0815	0.0198884	-0.194788	0.172802	0.116727	STD	0.6132	0.807988	0.796688	-3	3	0.6019	0.6019	1.03528	-0.0214829	0.60165	0.60165	-1.78	-0.167588	-0.167588	line1	-15	15	-1.73164
2021-06-23 18:52:38	ETH-3	476	STD	46	16916.3	17165	-128.257	-129.569	79	1.51184	0.00151746	7.04548	-1.65015	0.00171087	4.46631	0.00143402	11.7679	0.0017328	22.7198	0.0634399	-0.932251	27.2354	2.65354	-0.86761	0.0625116	16.0506	0.0221373	-0.176563	#DIV/0!	0.133638	STD	0.6132	0.789763	0.798876	-3	0	0.622313	0.622313	1.03528	-0.0214829	0.622783	0.622783	-1.78	-0.129851	line2	-0.129851	-15	15
2021-06-24 13:16:20	ETH-3	477	STD	4	17715.6	17695.6	-131.289	-131.379	86	1.57863	0.00163815	7.21581	-1.48128	0.00224576	4.53482	0.00155928	11.939	0.00227476	23.3151	0.075283	-0.688788	32.2663	3.41357	3.61886	0.062027	16.3134	0.0239979	-0.154616	-0.09	0.136934	STD	0.6132	0.767816	0.78771	-3	3	0.633095	0.633095	1.03528	-0.0214829	0.633945	0.633945	-1.78	-0.298717	line2	-0.298717	-15	15
2021-06-24 15:03:13	ETH-3	477	STD	7	16139.8	16123.5	-122.356	-122.046	79	1.52098	0.00231434	6.98256	-1.71252	0.00387518	4.47269	0.00225359	11.7047	0.00392647	22.7945	0.0766322	-0.734667	39.8354	3.35339	11.5042	0.0760768	15.9768	0.0203934	-0.194405	-0.09	0.111531	STD	0.6132	0.807605	0.792633	-3	3	0.598228	0.598228	1.03528	-0.0214829	0.597848	0.597848	-1.78	-0.0674793	-0.0674793	line1	-15	15	-1.8431
2021-06-24 16:43:26	ETH-3	477	STD	10	17367.8	17604.6	-129.662	-130.821	80	1.51234	0.00154516	7.04609	-1.64954	0.00275232	4.4668	0.00149584	11.7685	0.00278819	22.8003	0.0652295	-0.854904	24.7254	2.95369	-3.31081	0.0477329	16.0388	0.0215938	-0.189278	-0.09	0.126359	STD	0.6132	0.802478	0.81556	-3	3	0.626282	0.626282	1.03528	-0.0214829	0.626892	0.626892	-1.78	-0.130461	line2	-0.130461	-15	15
2021-06-24 18:28:18	ETH-3	477	STD	13	15435.9	15386.2	-118.797	-118.368	77	1.53785	0.0014664	7.12553	-1.57079	0.00236189	4.49347	0.00142756	11.8483	0.0023933	23.0914	0.0669832	-0.728163	36.3698	4.01522	7.82999	0.0671125	16.1107	0.0226699	-0.223397	-0.09	0.138231	STD	0.6132	0.836597	0.823989	-3	3	0.600592	0.600592	1.03528	-0.0214829	0.600295	0.600295	-1.78	-0.209214	-0.209214	line1	-15	15	-1.69396
2021-06-24 20:11:56	ETH-3	477	STD	16	17065.6	16947.8	-128.382	-127.879	81	1.54524	0.00214084	7.20971	-1.48734	0.00286407	4.50332	0.00207181	11.9328	0.00290269	23.1655	0.0520098	-0.822605	38.4973	3.98239	9.72233	0.069995	16.2082	0.021439	-0.219692	-0.09	0.119129	STD	0.6132	0.832892	0.826402	-3	3	0.606709	0.606709	1.03528	-0.0214829	0.606629	0.606629	-1.78	-0.292662	line2	-0.292662	-15	15
2021-06-24 21:49:59	ETH-3	477	STD	19	16842.4	16961.9	-127.539	-127.9	82	1.58013	0.00194344	7.18011	-1.51668	0.00215009	4.53498	0.00184451	11.9031	0.00217812	23.1684	0.0623792	-0.76132	32.1016	2.52881	3.52854	0.0580797	16.2356	0.0221821	-0.196515	-0.09	0.134542	STD	0.6132	0.809715	0.816822	-3	3	0.620307	0.620307	1.03528	-0.0214829	0.620706	0.620706	-1.78	-0.26332	-0.26332	line1	-15	15	-1.68481
2021-06-24 23:39:12	ETH-3	477	STD	22	15743.3	15558.8	-120.748	-119.803	77	1.53977	0.00175968	7.1688	-1.52789	0.00247582	4.49677	0.00167781	11.8917	0.00250785	23.0112	0.062224	-0.892217	26.7527	2.96165	-1.60976	0.0478466	16.1863	0.0205932	-0.194658	-0.09	0.120846	STD	0.6132	0.807858	0.808787	-3	3	0.614128	0.614128	1.03528	-0.0214829	0.61431	0.61431	-1.78	-0.252106	line2	-0.252106	-15	15
2021-06-25 02:53:16	ETH-3	477	STD	28	15725.3	15592.9	-120.741	-120.18	76	1.51527	0.00223049	7.14091	-1.55554	0.00277965	4.47284	0.00213584	11.8637	0.00281645	23.0627	0.0656112	-0.786535	36.858	4.19659	8.29655	0.0649273	16.1483	0.017922	-0.180154	-0.105556	0.10452	STD	0.6132	0.793354	0.795897	-3	3	0.615743	0.615743	1.03528	-0.0214829	0.615981	0.615981	-1.78	-0.224458	line2	-0.224458	-15	15
2021-06-25 04:38:29	ETH-3	477	STD	31	15900.6	15705.1	-121.849	-120.809	77	1.52258	0.00250302	7.16235	-1.53429	0.00335849	4.48044	0.00242733	11.8852	0.00340398	23.0509	0.0699007	-0.840611	35.8229	5.01375	7.23908	0.0638523	16.1724	0.0200422	-0.185239	-0.103906	0.111972	STD	0.6132	0.798439	0.798438	-3	3	0.613199	0.613199	1.03528	-0.0214829	0.613347	0.613347	-1.78	-0.245709	-0.245709	line1	-15	15	-1.68668
2021-06-25 06:21:31	ETH-3	477	STD	34	18124.3	18415.9	-135.479	-136.72	85	1.51933	0.00159308	7.12433	-1.57198	0.00222813	4.47608	0.00150806	11.847	0.00225649	22.9158	0.0439917	-0.897176	21.4026	2.75702	-6.70398	0.0390367	16.125	0.0204227	-0.19032	-0.105101	0.127114	STD	0.6132	0.80352	0.806415	-3	3	0.616095	0.616095	1.03528	-0.0214829	0.616346	0.616346	-1.78	-0.20802	line2	-0.20802	-15	15
2021-06-25 08:08:55	ETH-3	477	STD	37	17496	17536.6	-131.734	-131.758	83	1.548	0.00134209	7.16103	-1.5356	0.00235702	4.50421	0.00127505	11.8839	0.00238693	23.0079	0.0643577	-0.880102	21.1961	3.48329	-7.00574	0.0381612	16.1768	0.0207121	-0.204086	-0.894768	0.124592	STD	0.6132	0.817286	0.802561	-3	3	0.598475	0.598475	1.03528	-0.0214829	0.598104	0.598104	-1.78	-0.244404	-0.244404	line1	-15	15	-1.67411
2021-06-25 09:35:54	ETH-3	477	STD	40	16552.1	16632.1	-126.294	-126.139	79	1.4655	0.00197615	6.89668	-1.79766	0.00436356	4.41773	0.00197586	11.6184	0.0044213	22.6762	0.0512777	-0.679694	13.7056	2.74966	-13.6908	0.0245851	15.8553	0.0188248	-0.173678	-0.679286	0.0962012	STD	0.6132	0.786878	0.801212	-3	3	0.627535	0.627535	1.03528	-0.0214829	0.628189	0.628189	-1.78	0.0176629	line2	0.0176629	-15	15
2021-06-25 11:21:38	ETH-3	477	STD	43	19386.8	19546.4	-142.229	-142.75	88	1.52132	0.00154937	7.15216	-1.54439	0.00211385	4.47891	0.00148531	11.875	0.00214163	23.0143	0.0609572	-0.856094	14.2161	2.88132	-13.7493	0.0267402	16.1596	0.0150684	-0.186274	0.0151957	0.0897709	STD	0.6132	0.799474	0.787583	-3	3	0.601309	0.601309	1.03528	-0.0214829	0.601038	0.601038	-1.78	-0.235608	-0.235608	line1	-15	15	-1.69494
2021-06-25 13:05:26	ETH-3	477	STD	46	16656.7	16907.9	-126.56	-127.835	80	1.50055	0.00172409	7.03696	-1.65859	0.00309458	4.45544	0.00165104	11.7593	0.00313426	22.846	0.0601825	-0.792102	30.4176	3.30411	2.25533	0.0547828	16.0444	0.0211762	-0.163198	#DIV/0!	0.124954	STD	0.6132	0.776398	0.787936	-3	0	0.624738	0.624738	1.03528	-0.0214829	0.625293	0.625293	-1.78	-0.121409	line2	-0.121409	-15	15
2021-06-25 15:24:39	ETH-3	478	STD	1	20041.5	20331	-144.887	-147.775	95	1.46771	0.00306937	6.88824	-1.80603	0.0055859	4.4195	0.00305334	11.6099	0.00566139	22.8112	0.0639976	-0.531045	38.0513	4.90907	10.0101	0.0863447	15.938	0.0263606	-0.0859034	-0.09	0.133197	STD	0.6132	0.699103	0.699103	0	3	0.6132	0.6132	1.03528	-0.0214829	0.613348	0.613348	-1.78	0.0260257	0.0260257	line1	-15	15	-1.95658
2021-06-25 20:31:41	ETH-3	478	STD	10	19644.6	20066.5	-143.274	-145.391	92	1.50468	0.00125966	7.04219	-1.65341	0.00214279	4.45949	0.00118022	11.7645	0.00216943	22.7581	0.0476299	-0.888316	22.4586	1.90376	-5.50005	0.0510373	16.0283	0.0191453	-0.188276	-0.09	0.118405	STD	0.6132	0.801476	0.84179	-3	3	0.653514	0.653514	1.03528	-0.0214829	0.655085	0.655085	-1.78	-0.126591	line2	-0.126591	-15	15
2021-06-25 22:04:38	ETH-3	478	STD	13	16321.5	16409.9	-124.256	-124.799	82	1.50727	0.00155869	7.05491	-1.6408	0.00193827	4.46236	0.00149347	11.7773	0.00196398	22.8622	0.0561512	-0.811836	24.5938	2.78367	-3.4511	0.053707	15.962	0.0194345	-0.268904	-0.0622234	0.119135	STD	0.6132	0.882104	0.838258	-3	3	0.569354	0.569354	1.03528	-0.0214829	0.567956	0.567956	-1.78	-0.139199	-0.139199	line1	-15	15	-1.74771
2021-06-25 23:52:53	ETH-3	478	STD	16	19556.8	19715.9	-143.267	-143.36	91	1.5228	0.00181314	7.05389	-1.64181	0.00273668	4.47688	0.0017477	11.7763	0.00277268	22.7841	0.050537	-0.886231	27.6345	3.37132	-0.507692	0.0627304	16.0279	0.0189714	-0.217995	-0.0645589	0.106642	STD	0.6132	0.831195	0.834977	-3	3	0.616982	0.616982	1.03528	-0.0214829	0.617264	0.617264	-1.78	-0.138192	line2	-0.138192	-15	15
2021-06-26 01:35:13	ETH-3	478	STD	19	20393.6	20880.9	-147.099	-149.816	92	1.51415	0.00135252	7.04662	-1.64902	0.0023692	4.46852	0.00129672	11.769	0.00239968	22.6099	0.0589436	-1.04196	17.4109	2.49307	-10.428	0.040052	16.0521	0.0135057	-0.178433	-0.0927402	0.0845228	STD	0.6132	0.791633	0.807295	-3	3	0.628863	0.628863	1.03528	-0.0214829	0.629564	0.629564	-1.78	-0.130985	-0.130985	line1	-15	15	-1.77829
2021-06-26 03:21:58	ETH-3	478	STD	22	15686.3	15772.9	-120.539	-121.112	78	1.46969	0.0016218	6.99128	-1.70388	0.00210887	4.42493	0.00154771	11.7134	0.0021364	22.6001	0.0655417	-0.941599	33.7164	3.73302	5.58641	0.0738496	15.9442	0.0162834	-0.185858	-0.11217	0.093511	STD	0.6132	0.799058	0.784449	-3	3	0.59859	0.59859	1.03528	-0.0214829	0.598224	0.598224	-1.78	-0.0761209	line2	-0.0761209	-15	15
2021-06-26 05:03:14	ETH-3	478	STD	25	20300.2	20732.2	-146.96	-149.1	91	1.48193	0.00162826	7.0594	-1.63635	0.00196857	4.43878	0.00153405	11.7818	0.00199346	22.7955	0.0606258	-0.885809	14.8701	2.27148	-12.8925	0.0342297	16.0631	0.0189476	-0.149455	-0.0985338	0.110971	STD	0.6132	0.762655	0.801866	-3	3	0.65241	0.65241	1.03528	-0.0214829	0.653942	0.653942	-1.78	-0.143649	-0.143649	line1	-15	15	-1.77315
2021-06-26 06:51:32	ETH-3	478	STD	28	17793.1	17776.6	-133.285	-133.025	85	1.53536	0.00164088	7.13366	-1.56272	0.00194597	4.49142	0.00155525	11.8564	0.00197107	22.8516	0.0583936	-0.978402	22.0899	2.40317	-6.06986	0.0487902	16.1092	0.0167743	-0.230683	-0.185431	0.100225	STD	0.6132	0.843883	0.802641	-3	3	0.571958	0.571958	1.03528	-0.0214829	0.570652	0.570652	-1.78	-0.217276	line2	-0.217276	-15	15
2021-06-26 08:37:37	ETH-3	478	STD	31	17334.9	17203.4	-130.737	-129.506	83	1.54632	0.00208602	7.09479	-1.60127	0.00239515	4.50034	0.00200148	11.8174	0.00242742	22.9172	0.0772945	-0.837333	23.0595	3.49384	-5.06145	0.0510942	16.1232	0.0202132	-0.188185	-0.135001	0.120462	STD	0.6132	0.801385	0.817291	-3	3	0.629107	0.629107	1.03528	-0.0214829	0.629816	0.629816	-1.78	-0.178735	-0.178735	line1	-15	15	-1.71038
2021-06-26 10:22:32	ETH-3	478	STD	34	20026.6	20491	-145.624	-147.602	90	1.50629	0.00172765	7.05076	-1.64491	0.00242721	4.4613	0.00166657	11.7731	0.00245946	22.8197	0.0600109	-0.845171	14.0052	2.21435	-13.7409	0.0320209	16.0335	0.013376	-0.193406	-0.142016	0.0794954	STD	0.6132	0.806606	0.804152	-3	3	0.610747	0.610747	1.03528	-0.0214829	0.610809	0.610809	-1.78	-0.135088	line2	-0.135088	-15	15
2021-06-26 12:10:33	ETH-3	478	STD	37	15174.4	15211.9	-117.989	-117.689	78	1.54154	0.00184679	7.12765	-1.56868	0.00212052	4.497	0.00173103	11.8504	0.00214692	22.8515	0.0619359	-0.966659	27.1698	4.06902	-1.12417	0.0594894	16.1492	0.0187468	-0.191267	-0.11612	0.113617	STD	0.6132	0.804467	0.793276	-3	3	0.602009	0.602009	1.03528	-0.0214829	0.601762	0.601762	-1.78	-0.211316	-0.211316	line1	-15	15	-1.69094
2021-06-26 13:50:46	ETH-3	478	STD	40	17354.8	17581	-130.545	-131.757	83	1.52125	0.00141598	7.10388	-1.59226	0.00226962	4.47716	0.00135172	11.8265	0.00229878	22.9948	0.0771538	-0.779492	25.7471	2.27375	-2.44026	0.0576499	16.1412	0.0153983	-0.155555	-0.0947569	0.0927575	STD	0.6132	0.768755	0.787071	-3	3	0.631516	0.631516	1.03528	-0.0214829	0.632311	0.632311	-1.78	-0.187744	line2	-0.187744	-15	15
2021-06-26 15:25:44	ETH-3	478	STD	43	16648.1	16877.3	-126.417	-127.879	94	1.48341	0.00320718	6.9213	-1.77326	0.00462688	4.43536	0.00314537	11.6432	0.00469039	22.6052	0.0579869	-0.797963	29.5762	3.69601	1.68346	0.0660428	15.897	0.0168207	-0.174791	0.121946	0.0860925	STD	0.6132	0.787991	0.785739	-3	3	0.610948	0.610948	1.03528	-0.0214829	0.611017	0.611017	-1.78	-0.00674467	-0.00674467	line1	-15	15	-1.89195
2021-06-26 17:12:01	ETH-3	478	STD	46	20786.7	21660	-149.604	-152.944	92	1.46523	0.00151661	6.92543	-1.76916	0.00230268	4.41847	0.00144838	11.6473	0.0023324	22.2654	0.0623085	-1.13805	7.74502	1.89843	-19.5455	0.0185907	15.8707	0.0144713	-0.187271	#DIV/0!	0.0822264	STD	0.6132	0.800471	0.794231	-3	0	0.60696	0.60696	1.03528	-0.0214829	0.606888	0.606888	-1.78	-0.0108377	line2	-0.0108377	-15	15
2021-06-28 11:07:15	ETH-3	479	STD	1	16194.8	16289.5	-119.289	-119.68	83	1.53003	0.00173803	7.04169	-1.65391	0.00175479	4.48323	0.00163613	11.7641	0.00177706	22.5018	0.0678517	-1.13777	51.5465	4.00826	22.7674	0.0962591	16.1701	0.0198062	-0.0726786	-0.09	0.116298	STD	0.6132	0.685879	0.747145	0	3	0.674467	0.674467	1.03528	-0.0214829	0.676776	0.676776	-1.78	-0.126093	-0.126093	line1	-15	15	-1.7726
2021-06-28 12:49:23	ETH-3	479	STD	4	13536.8	13546.6	-104.121	-104.251	74	1.50987	0.00149164	7.05467	-1.64103	0.00247009	4.46479	0.00142898	11.7771	0.00250195	22.9564	0.0602015	-0.719389	34.5724	3.49656	6.25214	0.0638553	16.0392	0.0193776	-0.195212	-0.09	0.117477	STD	0.6132	0.808412	0.747145	-3	3	0.551933	0.551933	1.03528	-0.0214829	0.54992	0.54992	-1.78	-0.138968	line2	-0.138968	-15	15
2021-06-28 16:14:38	ETH-3	479	STD	10	18340.9	18692.9	-132.917	-134.974	84	1.57926	0.00154766	7.15629	-1.54029	0.0024871	4.53334	0.00149168	11.8792	0.0025196	23.2727	0.0551539	-0.612181	30.3175	2.81244	1.84195	0.05592	16.1727	0.0177895	-0.233416	-0.09	0.106445	STD	0.6132	0.846616	0.846616	-3	3	0.6132	0.6132	1.03528	-0.0214829	0.613348	0.613348	-1.78	-0.23971	line2	-0.23971	-15	15
2021-06-28 19:53:56	ETH-3	479	STD	16	16508.6	16611.7	-123.383	-123.858	79	1.54241	0.00217474	7.12023	-1.57605	0.0020425	4.49756	0.00207095	11.8429	0.00207004	22.9518	0.06831	-0.85394	36.1623	4.17802	7.63439	0.0641379	16.1149	0.0192184	-0.218348	-0.09	0.113168	STD	0.6132	0.831548	0.813047	-3	3	0.594699	0.594699	1.03528	-0.0214829	0.594195	0.594195	-1.78	-0.203953	line2	-0.203953	-15	15
2021-06-28 21:40:13	ETH-3	479	STD	19	16719.8	16775.1	-124.998	-125.359	79	1.49968	0.00138836	7.18925	-1.50762	0.00278853	4.45991	0.00135278	11.9121	0.00282479	23.1031	0.0549787	-0.842831	27.5682	3.20957	-0.817393	0.0482153	16.1815	0.020553	-0.181347	-0.09	0.121282	STD	0.6132	0.794547	0.816011	-3	3	0.634664	0.634664	1.03528	-0.0214829	0.63557	0.63557	-1.78	-0.272378	-0.272378	line1	-15	15	-1.51164
2021-06-28 23:29:00	ETH-3	479	STD	22	20489	20746.8	-146.344	-146.975	93	1.54225	0.00142564	7.07463	-1.62125	0.00159744	4.49582	0.00135085	11.7972	0.00161811	22.9023	0.0547865	-0.811922	15.904	2.30508	-11.9763	0.029005	16.0776	0.0195434	-0.208739	-0.09	0.117528	STD	0.6132	0.821939	0.815985	-3	3	0.607247	0.607247	1.03528	-0.0214829	0.607185	0.607185	-1.78	-0.158753	line2	-0.158753	-15	15
2021-06-29 01:13:59	ETH-3	479	STD	25	13775	14005.2	-107.544	-108.927	83	1.50597	0.00127903	7.02922	-1.66627	0.00209404	4.46025	0.00119805	11.7515	0.00212006	22.9011	0.0782819	-0.722908	42.0573	4.91128	13.5875	0.073479	15.9858	0.0233105	-0.218271	-0.09	0.143494	STD	0.6132	0.831471	0.838533	-3	3	0.620262	0.620262	1.03528	-0.0214829	0.620659	0.620659	-1.78	-0.113734	-0.113734	line1	-15	15	-1.72259
2021-06-29 03:00:50	ETH-3	479	STD	28	14436.7	14598.4	-111.777	-112.631	75	1.40911	0.0014721	7.09594	-1.60012	0.00195771	4.37181	0.00137795	11.8183	0.00198198	22.8938	0.0574017	-0.861948	31.4916	3.78485	3.27448	0.0550242	15.9282	0.0200578	-0.248988	-0.09	0.125603	STD	0.6132	0.862188	0.846829	-3	3	0.597841	0.597841	1.03528	-0.0214829	0.597448	0.597448	-1.78	-0.179879	line2	-0.179879	-15	15
2021-06-29 06:16:20	ETH-3	479	STD	34	20206.5	20868.6	-145.334	-148.25	91	1.55367	0.0017158	7.1194	-1.57686	0.00284427	4.50808	0.00166007	11.8421	0.00288156	22.9265	0.0453687	-0.877094	21.2997	3.10959	-6.82868	0.0391181	16.1569	0.0163645	-0.187062	-0.103277	0.0974913	STD	0.6132	0.800262	0.822644	-3	3	0.635582	0.635582	1.03528	-0.0214829	0.63652	0.63652	-1.78	-0.203135	line2	-0.203135	-15	15
2021-06-29 07:47:53	ETH-3	479	STD	37	15191.6	15302.4	-116.849	-117.148	75	1.55564	0.00153389	7.12961	-1.56674	0.0017799	4.51028	0.00143157	11.8524	0.00180174	22.9654	0.0694858	-0.859316	38.8373	3.58821	10.2038	0.067223	16.1238	0.0166433	-0.231826	-0.0491975	0.100659	STD	0.6132	0.845026	0.822644	-3	3	0.590818	0.590818	1.03528	-0.0214829	0.590177	0.590177	-1.78	-0.213259	-0.213259	line1	-15	15	-1.61693
2021-06-29 12:51:48	ETH-3	479	STD	46	14753.2	14930.9	-113.842	-114.817	74	1.54499	0.00206089	7.17676	-1.52	0.00269865	4.50194	0.00195283	11.8997	0.00273321	23.2407	0.0556394	-0.683867	35.1261	4.83395	6.51096	0.0616791	16.234	0.020655	-0.16076	-0.09	0.117545	STD	0.6132	0.77396	0.77396	-3	0	0.6132	0.6132	1.03528	-0.0214829	0.613348	0.613348	-1.78	-0.260002	line2	-0.260002	-15	15
2021-06-29 16:46:23	ETH-3	480	STD	4	23252.4	24284.4	-161.01	-164.599	102	1.50208	0.00193303	7.03012	-1.66538	0.0026245	4.45664	0.00186451	11.7524	0.00265953	22.4434	0.0511539	-1.17176	0.0693082	1.59766	-27.2515	0.000853991	15.9955	0.0206712	-0.205827	-0.09	0.118779	STD	0.6132	0.819027	0.770376	-3	3	0.564549	0.564549	1.03528	-0.0214829	0.562981	0.562981	-1.78	-0.114622	line2	-0.114622	-15	15
2021-06-29 18:33:29	ETH-3	480	STD	7	14395.7	14455.5	-111.608	-111.566	78	1.52927	0.00147405	7.1576	-1.53899	0.00161439	4.48654	0.00138071	11.8804	0.00163444	23.024	0.0697901	-0.857467	23.8378	3.36689	-4.41124	0.0511497	16.252	0.019663	-0.108525	-0.09	0.12082	STD	0.6132	0.721725	0.806747	-3	3	0.698222	0.698222	1.03528	-0.0214829	0.701369	0.701369	-1.78	-0.241005	-0.241005	line1	-15	15	-1.67535
2021-06-29 20:19:33	ETH-3	480	STD	10	24379.2	25618.9	-166.595	-170.817	100	1.5213	0.00196859	7.0299	-1.6656	0.00222276	4.47464	0.00189983	11.7522	0.00225339	22.2434	0.0464497	-1.36686	-8.44802	1.68901	-35.5542	-0.0185335	15.9527	0.016912	-0.266287	-0.09	0.0991003	STD	0.6132	0.879487	0.827382	-3	3	0.561095	0.561095	1.03528	-0.0214829	0.559405	0.559405	-1.78	-0.114405	line2	-0.114405	-15	15
2021-06-29 22:05:08	ETH-3	480	STD	13	18293.4	18793.7	-135.105	-137.306	93	1.48383	0.00151184	7.04088	-1.65471	0.00171615	4.43991	0.00142586	11.7632	0.00173798	22.5738	0.0441645	-1.0657	11.8282	1.77043	-15.8167	0.0255899	15.9258	0.020601	-0.267734	-0.09	0.123697	STD	0.6132	0.880934	0.86563	-3	3	0.597896	0.597896	1.03528	-0.0214829	0.597505	0.597505	-1.78	-0.12529	-0.12529	line1	-15	15	-1.78857
2021-06-29 23:52:08	ETH-3	480	STD	16	18615.5	18929	-135.993	-138.066	101	1.5345	0.00161217	7.11473	-1.5815	0.0022279	4.48996	0.00154791	11.8374	0.00225725	22.8572	0.0643198	-0.935433	19.2113	3.91506	-8.83139	0.0417683	16.0965	0.018907	-0.223268	-0.09	0.114139	STD	0.6132	0.836468	0.841534	-3	3	0.618265	0.618265	1.03528	-0.0214829	0.618593	0.618593	-1.78	-0.198501	line2	-0.198501	-15	15
2021-06-30 01:35:57	ETH-3	480	STD	19	14396.6	14635.6	-111.913	-113.297	89	1.48083	0.00145441	7.15812	-1.53848	0.00236887	4.44118	0.00134218	11.8809	0.00239757	23.24	0.064398	-0.647348	29.6198	3.48644	1.25852	0.0621606	16.1182	0.0159939	-0.194	-0.09	0.101423	STD	0.6132	0.8072	0.831066	-3	3	0.637067	0.637067	1.03528	-0.0214829	0.638057	0.638057	-1.78	-0.241522	-0.241522	line1	-15	15	-1.69745
2021-06-30 03:21:12	ETH-3	480	STD	22	14046.5	13937.1	-109.888	-109.005	88	1.53882	0.00134874	7.15197	-1.54458	0.00209834	4.4953	0.00128435	11.8748	0.00212523	23.0947	0.0628842	-0.777331	27.7254	3.62149	-0.629452	0.0582004	16.1257	0.0220216	-0.236332	-0.09	0.135492	STD	0.6132	0.849532	0.822137	-3	3	0.585806	0.585806	1.03528	-0.0214829	0.584988	0.584988	-1.78	-0.235424	line2	-0.235424	-15	15
2021-06-30 05:03:43	ETH-3	480	STD	25	18613.5	19182	-136.802	-139.613	96	1.51697	0.00144437	7.11199	-1.58421	0.00183144	4.47343	0.00137261	11.8346	0.00185513	22.927	0.0514945	-0.861789	14.4222	2.28089	-13.4657	0.0312332	16.1037	0.0135872	-0.196481	-0.09	0.0840526	STD	0.6132	0.809681	0.825313	-3	3	0.628832	0.628832	1.03528	-0.0214829	0.629532	0.629532	-1.78	-0.195793	-0.195793	line1	-15	15	-1.72677
2021-06-30 06:52:49	ETH-3	480	STD	28	20428.4	20992.9	-146.571	-148.918	92	1.52076	0.00154163	7.0512	-1.64448	0.00208425	4.47488	0.0014803	11.7736	0.00211177	22.6803	0.0543071	-0.982254	7.75325	2.11329	-19.8367	0.0175531	16.0378	0.0152156	-0.203528	-0.09	0.0912647	STD	0.6132	0.816728	0.804223	-3	3	0.600695	0.600695	1.03528	-0.0214829	0.600403	0.600403	-1.78	-0.135521	line2	-0.135521	-15	15
2021-06-30 08:43:19	ETH-3	480	STD	31	21106.8	21603	-150.115	-152.095	94	1.5322	0.00190085	7.0396	-1.65598	0.00323017	4.48519	0.001873	11.762	0.00327366	22.5999	0.0614806	-1.03783	10.0458	3.31879	-17.596	0.0233843	16.0681	0.0181479	-0.173061	-0.09	0.0985875	STD	0.6132	0.786261	0.798654	-3	3	0.625593	0.625593	1.03528	-0.0214829	0.626179	0.626179	-1.78	-0.124022	-0.124022	line1	-15	15	-1.79321
2021-06-30 10:25:15	ETH-3	480	STD	34	15561.1	15910.2	-118.901	-121.12	79	1.48276	0.00164009	6.98309	-1.712	0.00427722	4.4369	0.00162258	11.7052	0.00433243	22.7401	0.0555668	-0.788634	34.8101	3.92595	6.65322	0.0735108	15.9548	0.0199892	-0.179773	-0.09	0.122996	STD	0.6132	0.792973	0.789617	-3	3	0.609844	0.609844	1.03528	-0.0214829	0.609874	0.609874	-1.78	-0.0680039	line2	-0.0680039	-15	15
2021-06-30 14:00:37	ETH-3	480	STD	40	19175.9	19560.8	-139.46	-141.6	90	1.53604	0.00168314	7.1205	-1.57577	0.00156302	4.4916	0.00159241	11.8432	0.00158345	22.8603	0.0628544	-0.943871	14.5667	2.77684	-13.3607	0.0323409	16.1404	0.0204933	-0.187344	-0.09	0.126	STD	0.6132	0.800544	0.783771	-3	3	0.596428	0.596428	1.03528	-0.0214829	0.595985	0.595985	-1.78	-0.20423	line2	-0.20423	-15	15
2021-06-30 15:34:33	ETH-3	480	STD	43	17931.3	18173	-132.74	-134.125	84	1.51509	0.00236392	7.01397	-1.68139	0.00393051	4.46827	0.00232403	11.7362	0.00398342	22.7056	0.0721546	-0.883732	24.9191	4.58924	-3.06278	0.0542621	16.0446	0.0223305	-0.153799	-2.3404	0.117911	STD	0.6132	0.766999	0.780385	-3	2	0.626585	0.626585	1.03528	-0.0214829	0.627206	0.627206	-1.78	-0.0986142	-0.0986142	line1	-15	15	-1.7927
2021-06-30 17:01:47	ETH-3	480	STD	46	21383.3	22328.1	-151.368	-155.288	94	1.4937	0.00140839	7.02293	-1.6725	0.00231086	4.44853	0.00134961	11.7452	0.0023407	22.5023	0.0569561	-1.1	-5.0195	1.63431	-32.1792	-0.0108433	16.0261	0.0143916	-0.160411	#DIV/0!	0.0865935	STD	0.6132	0.773611	0.770305	-3	0	0.609894	0.609894	1.03528	-0.0214829	0.609926	0.609926	-1.78	-0.107496	line2	-0.107496	-15	15
2021-07-01 07:32:04	ETH-3	481	STD	7	22213.1	22997.7	0	0	98	1.51029	0.00179691	0	-1.65201	0.00201753	4.46582	0.00170892	11.8071	0.00204401	22.94	0.0619429	-0.794752	78.4011	2.28551	48.8194	0.0974173	16.0607	0.0185901	-0.204025	0	0.106696	STD	0.6132	0.817225	0.817225	-3	3	0.6132	0.6132	1.03528	-0.0214829	0.613348	0.613348	-1.78	-0.127991	-0.127991	line1	-15	15	-1.71162
2021-07-01 07:32:04	ETH-3	481	STD	13	17884.2	18492.6	0	0	86	1.46683	0.0015905	0	-1.66374	0.00178279	4.42468	0.00151175	11.7952	0.00180614	23.0842	0.0507161	-0.630276	82.1147	3.30727	52.5015	0.0934846	16.086	0.0180917	-0.125209	0	0.108961	STD	0.6132	0.738409	0.738409	-3	3	0.6132	0.6132	1.03528	-0.0214829	0.613348	0.613348	-1.78	-0.116265	-0.116265	line1	-15	15	-1.72726
2021-07-01 07:32:04	ETH-3	481	STD	19	22492.5	23431.4	0	0	96	1.50649	0.00245842	0	-1.67683	0.00339291	4.46138	0.00239057	11.782	0.00343902	22.7274	0.0544105	-0.952826	41.2715	4.63353	12.7615	0.0216597	16.0685	0.0155317	-0.167315	0	0.0836971	STD	0.6132	0.780515	0.780515	-3	3	0.6132	0.6132	1.03528	-0.0214829	0.613348	0.613348	-1.78	-0.103168	-0.103168	line1	-15	15	-1.73108
2021-07-01 07:32:04	ETH-3	481	STD	25	16745.7	17081.5	0	0	82	1.49839	0.00169989	0	-1.7008	0.00210645	4.45295	0.00157956	11.7577	0.00213202	22.6977	0.0602549	-0.933874	33.048	3.61357	4.82066	0.0288645	16.0094	0.0205087	-0.193206	0	0.130007	STD	0.6132	0.806406	0.806013	-3	3	0.612807	0.612807	1.03528	-0.0214829	0.612942	0.612942	-1.78	-0.0791955	-0.0791955	line1	-15	15	-1.75386
2021-07-01 07:32:04	ETH-3	481	STD	28	14518.7	14764.1	0	0	80	1.50645	0.0017139	0	-1.63598	0.00191567	4.46278	0.00161951	11.8234	0.00194025	22.9663	0.0703955	-0.80114	57.5452	4.65517	28.5066	0.0804241	16.0853	0.0184809	-0.19242	0	0.111155	STD	0.6132	0.80562	0.806013	-3	3	0.613593	0.613593	1.03528	-0.0214829	0.613755	0.613755	-1.78	-0.144019	line2	-0.144019	-15	15
2021-07-02 10:08:29	ETH-3	482	STD	4	18830.6	19449.3	0	0	87	1.52193	0.00162411	0	-1.67555	0.00205627	4.4759	0.0015361	11.7833	0.00208255	22.7906	0.0605719	-0.893722	24.6643	3.10993	-3.40804	0.0108086	16.0598	0.0154005	-0.192146	0	0.0919727	STD	0.6132	0.805346	0.795333	-3	3	0.603187	0.603187	1.03528	-0.0214829	0.602982	0.602982	-1.78	-0.104449	line2	-0.104449	-15	15
2021-07-02 10:08:29	ETH-3	482	STD	7	17131.6	17406.8	0	0	82	1.46288	0.00178032	0	-1.66032	0.00204869	4.4211	0.0017009	11.7986	0.00207593	22.7772	0.0550413	-0.937007	30.1089	3.86232	1.91597	0.0429871	16.038	0.0195246	-0.17212	0	0.113886	STD	0.6132	0.78532	0.801373	-3	3	0.629253	0.629253	1.03528	-0.0214829	0.629968	0.629968	-1.78	-0.119676	-0.119676	line1	-15	15	-1.73241
2021-07-02 10:08:29	ETH-3	482	STD	10	17706.3	18200.7	0	0	82	1.55484	0.0012707	0	-1.52296	0.00240122	4.51206	0.00123148	11.9379	0.00243243	23.195	0.0538324	-0.803977	24.0906	3.57575	-4.30327	0.0152306	16.2419	0.0191347	-0.200253	0	0.116832	STD	0.6132	0.813453	0.81141	-3	3	0.611157	0.611157	1.03528	-0.0214829	0.611233	0.611233	-1.78	-0.257041	line2	-0.257041	-15	15
2021-07-02 10:08:29	ETH-3	482	STD	13	18851.2	19364.4	0	0	86	1.51788	0.00153817	0	-1.741	0.00200571	4.46981	0.00145404	11.7171	0.00203127	22.5853	0.0593284	-0.963384	31.5858	2.93002	3.45952	0.0296725	15.9574	0.0203681	-0.222256	0	0.127609	STD	0.6132	0.835456	0.824454	-3	3	0.602199	0.602199	1.03528	-0.0214829	0.601959	0.601959	-1.78	-0.038999	-0.038999	line1	-15	15	-1.83275
2021-07-02 10:08:29	ETH-3	482	STD	19	16279.4	16622.8	0	0	79	1.55386	0.00140907	0	-1.64744	0.00257986	4.50679	0.0013165	11.8119	0.00261184	22.7324	0.0698455	-1.00685	32.3931	4.03908	4.02066	0.0378762	16.104	0.0194213	-0.20802	0	0.119359	STD	0.6132	0.82122	0.831937	-3	3	0.623917	0.623917	1.03528	-0.0214829	0.624444	0.624444	-1.78	-0.132555	-0.132555	line1	-15	15	-1.76955
2021-07-02 10:08:29	ETH-3	482	STD	22	16280.6	16530.7	0	0	83	1.54207	0.00141209	0	-1.57953	0.0021252	4.49812	0.00135239	11.8806	0.00215284	22.8522	0.0500669	-1.02556	32.3659	4.70479	3.86899	0.0405437	16.1411	0.0235005	-0.229454	0	0.139675	STD	0.6132	0.842654	0.8264	-3	3	0.596946	0.596946	1.03528	-0.0214829	0.596521	0.596521	-1.78	-0.200469	line2	-0.200469	-15	15
2021-07-02 10:08:29	ETH-3	482	STD	25	16447.4	16895.3	0	0	78	1.51885	0.00183822	0	-1.58283	0.0025082	4.47625	0.00174709	11.8772	0.00254052	22.9207	0.0531532	-0.952046	32.4897	4.54289	4.01921	0.0302624	16.1427	0.0209486	-0.202126	0	0.121732	STD	0.6132	0.815326	0.82899	-3	3	0.626864	0.626864	1.03528	-0.0214829	0.627495	0.627495	-1.78	-0.197174	-0.197174	line1	-15	15	-1.71774
2021-07-02 10:08:29	ETH-3	482	STD	37	17637.7	18071	0	0	83	1.49052	0.0015575	0	-1.60906	0.00197873	4.44879	0.00146267	11.8506	0.00200352	22.7644	0.069953	-1.05204	30.9312	3.54406	2.5853	0.0325218	16.0689	0.0242291	-0.220671	0	0.149422	STD	0.6132	0.833871	0.81291	-3	3	0.592239	0.592239	1.03528	-0.0214829	0.591648	0.591648	-1.78	-0.170939	-0.170939	line1	-15	15	-1.71936
2021-07-02 10:08:29	ETH-3	482	STD	40	19225.1	19959.7	0	0	87	1.4883	0.00159207	0	-1.76605	0.00281155	4.44122	0.00152636	11.6916	0.00284774	22.6084	0.0441807	-0.890592	17.0163	2.55964	-10.6339	-0.00755823	15.9467	0.0132932	-0.178749	0	0.080883	STD	0.6132	0.791949	0.794242	-3	3	0.615493	0.615493	1.03528	-0.0214829	0.615722	0.615722	-1.78	-0.0139514	line2	-0.0139514	-15	15
2021-07-02 10:08:29	ETH-3	482	STD	43	18879.7	19485.3	0	0	85	1.45151	0.00215036	0	-1.81722	0.00283238	4.40497	0.00208537	11.6397	0.00287092	22.395	0.0478075	-0.996634	26.2341	5.70716	-1.52874	0.00832871	15.8932	0.0224312	-0.143705	0	0.12448	STD	0.6132	0.756905	0.774427	-3	3	0.630722	0.630722	1.03528	-0.0214829	0.631489	0.631489	-1.78	0.0372211	0.0372211	line1	-15	15	-1.88408
2021/07/06 22:18:54	ETH-3	484	STD	7	13653.7	13742.8	-104.81	-105.232	83	1.55904	0.00128077	7.11237	-1.58383	0.00193332	4.51286	0.00121306	11.8351	0.00195788	23.0152	0.060283	-0.776515	29.8248	3.53726	1.47091	0.0710515	16.0662	0.0181492	-0.274339	-0.09	0.115586	STD	0.6132	0.887539	0.810295	-3	3	0.535956	0.535956	1.03528	-0.0214829	0.53338	0.53338	-1.78	-0.196166	-0.196166	line1	-15	15	-1.71068
2021/07/07 11:50:56	ETH-3	484	STD	13	17472.9	17786	-127.436	-129.103	82	1.53194	0.00195029	7.11406	-1.58216	0.00188459	4.48754	0.00185044	11.8367	0.00190946	22.9223	0.0672813	-0.870484	24.0605	3.19829	-4.11148	0.0684129	16.1984	0.0187651	-0.119851	-0.09	0.107761	STD	0.6132	0.733051	0.811127	-3	3	0.691275	0.691275	1.03528	-0.0214829	0.694178	0.694178	-1.78	-0.197843	-0.197843	line1	-15	15	-1.70901
2021/07/07 13:40:33	ETH-3	484	STD	16	19443.9	19839.8	-138.091	-139.593	88	1.56539	0.00198231	7.17712	-1.51965	0.00209686	4.52107	0.00188068	11.9001	0.00212427	22.9035	0.0502762	-1.01399	19.1845	3.72219	-9.01061	0.0504389	16.2149	0.0176039	-0.19959	-0.09	0.103983	STD	0.6132	0.81279	0.79192	-3	3	0.59233	0.59233	1.03528	-0.0214829	0.591742	0.591742	-1.78	-0.260355	line2	-0.260355	-15	15
2021/07/07 15:26:23	ETH-3	484	STD	19	17416.5	17846.1	-127.109	-129.043	81	1.50635	0.00158278	7.10439	-1.59174	0.0019159	4.46322	0.00148707	11.827	0.00193992	22.6359	0.065134	-1.13098	14.1642	3.33679	-13.6913	0.0356196	16.0649	0.0216649	-0.216718	-0.09	0.137425	STD	0.6132	0.829918	0.790849	-3	3	0.574131	0.574131	1.03528	-0.0214829	0.572902	0.572902	-1.78	-0.188258	-0.188258	line1	-15	15	-1.66606
2021/07/07 17:16:40	ETH-3	484	STD	22	18103	18386.8	-130.753	-131.733	85	1.38787	0.00180796	6.86012	-1.8339	0.00208071	4.34372	0.00172471	11.5815	0.0021082	22.1776	0.0620665	-1.09412	15.1266	3.4124	-12.1595	0.0365467	15.7996	0.01834	-0.11664	-0.09	0.105986	STD	0.6132	0.72984	0.788735	-3	3	0.672095	0.672095	1.03528	-0.0214829	0.674321	0.674321	-1.78	0.0539034	line2	0.0539034	-15	15
2021/07/07 19:01:56	ETH-3	484	STD	25	17241.9	17546.6	-126.243	-127.478	82	1.50991	0.00138645	7.08245	-1.6135	0.00197278	4.46579	0.00131587	11.805	0.00199803	22.772	0.0625059	-0.95454	14.4692	3.35585	-13.3552	0.0344691	16.0697	0.0217513	-0.193246	-0.09	0.132202	STD	0.6132	0.806446	0.768143	-3	1	0.574897	0.574897	1.03528	-0.0214829	0.573694	0.573694	-1.78	-0.166502	-0.166502	line1	-15	15	-1.68739
2021/07/08 12:33:45	ETH-3	485	STD	4	15123	15489.7	-113.969	-115.851	75	1.42586	0.001838	6.87218	-1.82195	0.00209644	4.37973	0.00173229	11.5937	0.00212304	22.4381	0.0693676	-0.863601	32.5708	3.66409	4.75369	0.094944	15.8067	0.0215182	-0.158468	-0.09	0.124852	STD	0.6132	0.771668	0.75161	-3	3	0.593142	0.593142	1.03528	-0.0214829	0.592583	0.592583	-1.78	0.0419509	line2	0.0419509	-15	15
2021/07/08 14:19:40	ETH-3	485	STD	7	16462.5	16500.7	-121.625	-121.752	80	1.42263	0.00218048	6.88168	-1.81253	0.00233528	4.37703	0.00208754	11.6033	0.00236684	22.3987	0.063855	-0.920958	26.8942	4.42077	-0.786143	0.0727476	15.8541	0.0228319	-0.118353	-0.09	0.130545	STD	0.6132	0.731553	0.75161	-3	3	0.633258	0.633258	1.03528	-0.0214829	0.634114	0.634114	-1.78	0.0325305	0.0325305	line1	-15	15	-1.82164
2021/07/08 21:30:11	ETH-3	485	STD	13	23743.4	24698.4	-160.72	-164.155	100	1.46403	0.00186223	6.98607	-1.70905	0.00251203	4.41945	0.00179473	11.7081	0.00254552	22.3718	0.0474683	-1.15435	26.7422	1.53249	-1.18188	0.0741148	15.8498	0.0211934	-0.267974	0.089633	0.122032	STD	0.6132	0.881174	0.876845	-3	3	0.60887	0.60887	1.03528	-0.0214829	0.608866	0.608866	-1.78	-0.0709539	-0.0709539	line1	-15	15	-1.71436
2021/07/08 23:15:38	ETH-3	485	STD	16	24732.5	25643.2	-164.88	-168.159	103	1.45932	0.00196479	7.00154	-1.69371	0.00330827	4.41558	0.00190495	11.7236	0.00335172	22.3458	0.0534241	-1.21039	32.4165	2.28658	4.31168	0.0870967	15.8699	0.0208923	-0.259315	-0.162756	0.120261	STD	0.6132	0.872515	0.876845	-3	3	0.61753	0.61753	1.03528	-0.0214829	0.617831	0.617831	-1.78	-0.0862896	line2	-0.0862896	-15	15
2021/07/09 04:23:53	ETH-3	485	STD	25	21744.8	22814.1	-150.735	-155.007	93	1.4402	0.00129911	6.95672	-1.73814	0.00249895	4.3961	0.00125103	11.6786	0.00253109	22.4244	0.0507121	-1.04468	16.9436	1.8752	-10.6327	0.0421313	15.8643	0.0167043	-0.201095	-0.160516	0.107064	STD	0.6132	0.814295	0.780369	-3	3	0.579274	0.579274	1.03528	-0.0214829	0.578226	0.578226	-1.78	-0.041857	-0.041857	line1	-15	15	-1.73609
2021/07/09 05:54:03	ETH-3	485	STD	28	20138.5	20569.4	-142.329	-143.788	89	1.46469	0.00212242	6.94696	-1.74782	0.00263119	4.41871	0.00204981	11.6689	0.00266692	22.3409	0.0552058	-1.10693	29.5259	2.90564	1.60296	0.0719006	15.9472	0.0161971	-0.133243	-0.09	0.0962305	STD	0.6132	0.746443	0.780369	-3	3	0.647126	0.647126	1.03528	-0.0214829	0.648471	0.648471	-1.78	-0.0321797	line2	-0.0321797	-15	15
2021/07/09 12:15:31	ETH-3	485	STD	40	18863.7	19703.7	-135.155	-138.644	87	1.40896	0.00209409	6.76206	-1.93112	0.00534305	4.36007	0.00210054	11.4832	0.00541285	22.0465	0.0504262	-1.02792	29.567	3.32021	2.06639	0.071891	15.6826	0.0201097	-0.153017	-0.087618	0.105116	STD	0.6132	0.766217	0.74539	-3	3	0.592373	0.592373	1.03528	-0.0214829	0.591787	0.591787	-1.78	0.151125	line2	0.151125	-15	15
2021/07/09 13:59:58	ETH-3	485	STD	43	14418.7	14542.7	-109.316	-110.24	76	1.45137	0.00146873	6.92697	-1.76763	0.00208219	4.40553	0.00139564	11.6488	0.00210891	22.5346	0.0738023	-0.878074	31.8763	3.73533	3.94295	0.0761732	15.9359	0.0217463	-0.111364	0.0774286	0.129389	STD	0.6132	0.724564	0.764775	-3	3	0.653411	0.653411	1.03528	-0.0214829	0.654978	0.654978	-1.78	-0.0123661	-0.0123661	line1	-15	15	-1.8174
2021/07/09 15:48:34	ETH-3	485	STD	46	16628.4	17369.7	-122.045	-126.237	84	1.32309	0.00161462	6.73886	-1.95412	0.00241704	4.2788	0.0015209	11.4597	0.00244742	22.3487	0.0687608	-0.686169	34.9019	2.92509	7.39225	0.0826636	15.5367	0.0181658	-0.190343	#DIV/0!	0.11279	STD	0.6132	0.803543	0.764054	-3	0	0.57371	0.57371	1.03528	-0.0214829	0.572466	0.572466	-1.78	0.174115	line2	0.174115	-15	15
2021/07/15 15:56:16	ETH-3	487	STD	1	18857.9	18996.4	-125.432	-126.149	87	1.60234	0.00148684	7.13529	-1.56111	0.00162523	4.55424	0.00140562	11.8582	0.00164613	21.9891	0.0820361	-1.82436	37.744	3.36	9.08231	0.0740586	16.3334	0.018771	-0.0764013	-0.09	0.113692	STD	0.6132	0.689601	0.728988	0	3	0.652586	0.652586	1.03528	-0.0214829	0.654124	0.654124	-1.78	-0.218891	-0.218891	line1	-15	15	-1.63471
2021/07/15 17:47:38	ETH-3	487	STD	4	17679	18080.5	-120.587	-122.71	83	1.55543	0.00154987	7.17512	-1.52163	0.00197759	4.51167	0.00143401	11.8981	0.00200132	23.04	0.046982	-0.87669	37.1048	3.08342	8.42817	0.0729727	16.2482	0.0166541	-0.155174	-0.09	0.102932	STD	0.6132	0.768374	0.728988	-3	3	0.573814	0.573814	1.03528	-0.0214829	0.572573	0.572573	-1.78	-0.258371	line2	-0.258371	-15	15
2021/07/15 21:40:03	ETH-3	487	STD	10	17450.2	18157.9	-120.221	-123.699	80	1.56369	0.00170157	7.14356	-1.55291	0.00237006	4.51831	0.00156664	11.8664	0.00239834	23.1471	0.0495277	-0.709548	36.4413	2.27358	7.83802	0.0722238	16.1893	0.0166436	-0.189208	-0.09	0.106178	STD	0.6132	0.802408	0.796118	-3	3	0.60691	0.60691	1.03528	-0.0214829	0.606836	0.606836	-1.78	-0.22709	line2	-0.22709	-15	15
2021/07/15 23:35:47	ETH-3	487	STD	13	19545.2	20281.8	-131.964	-134.999	87	1.55129	0.00121096	7.07697	-1.61893	0.00225473	4.50437	0.00112943	11.7995	0.0022826	22.8467	0.0622116	-0.870935	23.5784	2.26901	-4.52582	0.046712	16.1215	0.0190927	-0.176628	-0.09	0.11876	STD	0.6132	0.789828	0.804013	-3	3	0.627385	0.627385	1.03528	-0.0214829	0.628034	0.628034	-1.78	-0.161069	-0.161069	line1	-15	15	-1.76019
2021/07/16 01:34:36	ETH-3	487	STD	16	18591.4	19114	-127.138	-129.589	87	1.51847	0.00227219	6.90238	-1.79201	0.00330666	4.46755	0.00219538	11.6242	0.00335056	22.5713	0.0425661	-0.793719	32.4067	3.80608	4.44055	0.0631648	15.8796	0.0171154	-0.206602	-0.09	0.0971194	STD	0.6132	0.819802	0.817845	-3	3	0.611243	0.611243	1.03528	-0.0214829	0.611322	0.611322	-1.78	0.0120118	line2	0.0120118	-15	15
2021/07/16 03:27:02	ETH-3	487	STD	19	16844.4	17308.8	-118.684	-120.493	80	1.55153	0.00146092	7.18607	-1.51077	0.00230742	4.50839	0.00136969	11.9091	0.00233614	23.0612	0.0708614	-0.877642	35.1479	3.30248	6.50755	0.0669445	16.1789	0.0180903	-0.230704	-0.09	0.113961	STD	0.6132	0.843904	0.796127	-3	3	0.565423	0.565423	1.03528	-0.0214829	0.563886	0.563886	-1.78	-0.269231	-0.269231	line1	-15	15	-1.67362
2021/07/16 05:27:23	ETH-3	487	STD	22	18868.3	19152.6	-130.048	-130.583	86	1.52404	0.00191411	7.05862	-1.63712	0.00421132	4.4782	0.00188119	11.7811	0.00426614	22.5641	0.0550769	-1.11051	24.3287	3.32089	-3.73352	0.0467671	16.1422	0.0222783	-0.111475	-0.09	0.123289	STD	0.6132	0.724675	0.793955	-3	3	0.68248	0.68248	1.03528	-0.0214829	0.685072	0.685072	-1.78	-0.142875	line2	-0.142875	-15	15
2021/07/16 07:23:58	ETH-3	487	STD	25	17791.9	18475.7	-124.32	-127.866	86	1.56349	0.0015294	7.1735	-1.52323	0.00209635	4.51916	0.00145795	11.8965	0.00212351	23.2777	0.0528347	-0.641418	25.2851	2.65166	-3.0695	0.0475814	16.2088	0.0190361	-0.200085	-0.09	0.122856	STD	0.6132	0.813285	0.769256	-3	3	0.569171	0.569171	1.03528	-0.0214829	0.567766	0.567766	-1.78	-0.256772	-0.256772	line1	-15	15	-1.68292
2021/07/16 09:18:44	ETH-3	487	STD	28	16983.1	17379.8	-120.515	-122.138	80	1.57653	0.00142788	7.15595	-1.54063	0.00182205	4.53077	0.00133336	11.8789	0.00184449	23.0693	0.0563138	-0.81016	29.7174	3.54315	1.2621	0.0546438	16.2478	0.0221767	-0.156607	-0.09	0.136204	STD	0.6132	0.769807	0.770171	-3	3	0.613563	0.613563	1.03528	-0.0214829	0.613724	0.613724	-1.78	-0.239369	line2	-0.239369	-15	15
2021/07/16 11:20:08	ETH-3	487	STD	31	19741.8	20168.3	-134.93	-136.89	91	1.53354	0.002721	6.93468	-1.75999	0.00586491	4.48279	0.00271147	11.6567	0.00594248	22.573	0.0569109	-0.856149	22.914	3.98973	-4.87484	0.0434679	16.0214	0.0234113	-0.11422	-0.09	0.117382	STD	0.6132	0.72742	0.748614	-3	3	0.634394	0.634394	1.03528	-0.0214829	0.63529	0.63529	-1.78	-0.0200083	-0.0200083	line1	-15	15	-1.94521
2021/07/16 17:41:21	ETH-3	487	STD	37	17232.3	17618.1	-122.071	-123.454	80	1.47426	0.00177574	7.05966	-1.63609	0.00181434	4.4316	0.00167339	11.782	0.00183746	22.9318	0.0587959	-0.75316	40.9146	4.14621	12.4467	0.0823002	16.0585	0.0189187	-0.146924	-0.133802	0.110583	STD	0.6132	0.760124	0.794527	-3	3	0.647603	0.647603	1.03528	-0.0214829	0.648965	0.648965	-1.78	-0.143909	-0.143909	line1	-15	15	-1.80722
2021/07/16 19:36:59	ETH-3	487	STD	40	20279	21301.6	-138.299	-142.599	90	1.53604	0.00152671	7.05421	-1.64149	0.00274897	4.48929	0.00149198	11.7767	0.00278525	22.7424	0.0493264	-0.927579	13.5273	2.7555	-14.2419	0.0274269	16.0435	0.0184095	-0.21573	-0.16271	0.111274	STD	0.6132	0.82893	0.818811	-3	3	0.603081	0.603081	1.03528	-0.0214829	0.602873	0.602873	-1.78	-0.138508	line2	-0.138508	-15	15
2021/07/16 21:33:33	ETH-3	487	STD	43	16593	16936.7	-118.867	-120.288	80	1.55573	0.00125247	7.15356	-1.543	0.00207304	4.5112	0.00116688	11.8764	0.00209857	22.981	0.0611646	-0.891598	31.7263	4.28019	3.241	0.0592187	16.1258	0.0194914	-0.25418	-1.81705	0.121562	STD	0.6132	0.86738	0.854805	-3	2	0.600625	0.600625	1.03528	-0.0214829	0.600329	0.600329	-1.78	-0.236998	-0.236998	line1	-15	15	-1.71571
2021/07/16 23:09:56	ETH-3	487	STD	46	21323.3	22786.2	-143.579	-150.005	93	1.49117	0.00141622	7.03394	-1.66159	0.00235826	4.44655	0.00135915	11.7562	0.00238875	22.5754	0.0501782	-1.05039	-4.47722	1.57562	-31.6704	-0.0081482	15.9389	0.0152145	-0.254903	#DIV/0!	0.0973544	STD	0.6132	0.868103	0.867742	-3	0	0.612838	0.612838	1.03528	-0.0214829	0.612974	0.612974	-1.78	-0.118413	line2	-0.118413	-15	15
2021/07/19 12:00:21	ETH-3	488	STD	1	18366.3	18886.9	-122.851	-125.642	81	1.55583	0.00189639	7.17923	-1.51755	0.00176338	4.51218	0.00178105	11.9022	0.00178558	22.9243	0.0595111	-0.99779	49.0798	4.23645	20.0633	0.0944951	16.3198	0.0201983	-0.0893058	-0.09	0.120296	STD	0.6132	0.702506	0.75092	0	3	0.661615	0.661615	1.03528	-0.0214829	0.663471	0.663471	-1.78	-0.262451	-0.262451	line1	-15	15	-1.69026
2021/07/19 13:52:37	ETH-3	488	STD	4	19324.6	19828.3	-128.452	-130.928	88	1.57285	0.00148346	7.18322	-1.51359	0.00190608	4.52827	0.00139658	11.9062	0.00193009	23.0328	0.0530963	-0.89983	20.6025	2.5514	-7.65114	0.0402145	16.2422	0.0169877	-0.186135	-0.09	0.103011	STD	0.6132	0.799335	0.75031	-3	3	0.564175	0.564175	1.03528	-0.0214829	0.562594	0.562594	-1.78	-0.266406	line2	-0.266406	-15	15
2021/07/19 15:50:02	ETH-3	488	STD	7	20869.6	21748.9	-137.043	-140.471	91	1.61505	0.00154705	7.08691	-1.60907	0.00318854	4.56446	0.00150852	11.8097	0.00322993	22.8452	0.0543584	-0.892328	16.8687	2.03734	-11.134	0.0329497	16.2356	0.0182332	-0.13589	-0.09	0.107909	STD	0.6132	0.74909	0.782753	-3	3	0.646863	0.646863	1.03528	-0.0214829	0.648199	0.648199	-1.78	-0.170925	-0.170925	line1	-15	15	-1.73391
2021/07/19 17:43:35	ETH-3	488	STD	10	14679.9	15045.2	-104.727	-106.856	75	1.55464	0.00156815	7.14751	-1.549	0.00248609	4.50996	0.00148476	11.8704	0.00251759	23.0321	0.0607991	-0.829695	41.5494	4.21912	12.8062	0.0777466	16.1871	0.0182336	-0.186635	-0.09	0.110315	STD	0.6132	0.799835	0.796886	-3	3	0.610251	0.610251	1.03528	-0.0214829	0.610295	0.610295	-1.78	-0.231003	line2	-0.231003	-15	15
2021/07/19 19:40:55	ETH-3	488	STD	13	17201.9	17775.7	-118.783	-121.71	81	1.53377	0.00158232	7.12013	-1.57614	0.00206612	4.48946	0.00150933	11.8428	0.00209305	22.8763	0.0609837	-0.927509	28.4546	3.52723	0.147876	0.0528594	16.096	0.0212355	-0.228532	-0.09	0.133652	STD	0.6132	0.841732	0.825655	-3	3	0.597124	0.597124	1.03528	-0.0214829	0.596705	0.596705	-1.78	-0.203861	-0.203861	line1	-15	15	-1.71674
2021/07/19 21:31:56	ETH-3	488	STD	16	13663.4	13840.1	-99.485	-100.784	75	1.61602	0.00151564	7.34183	-1.35636	0.00194969	4.57423	0.00140995	12.0655	0.00197346	23.4789	0.0710227	-0.778804	44.5157	5.55073	15.2368	0.0820416	16.4108	0.0190282	-0.222199	-0.09	0.117799	STD	0.6132	0.835399	0.830753	-3	3	0.608554	0.608554	1.03528	-0.0214829	0.608539	0.608539	-1.78	-0.423645	line2	-0.423645	-15	15
2021/07/19 23:27:46	ETH-3	488	STD	19	19715.3	20329.2	-132.977	-135.57	88	1.46012	0.00268756	6.80502	-1.88853	0.00537381	4.40949	0.00268435	11.5264	0.00544578	22.2754	0.0539416	-0.889539	17.367	3.16552	-9.94283	0.0323525	15.7271	0.0166173	-0.201929	-0.09	0.0903074	STD	0.6132	0.815129	0.81831	-3	3	0.616381	0.616381	1.03528	-0.0214829	0.616642	0.616642	-1.78	0.108532	0.108532	line1	-15	15	-1.97944
2021/07/20 01:24:54	ETH-3	488	STD	22	17010.8	17494.4	-118.978	-121.454	80	1.54728	0.00152811	7.18891	-1.50796	0.00183941	4.50451	0.00141475	11.9119	0.00186143	22.9659	0.0515798	-0.976387	27.7553	3.33889	-0.681881	0.0495717	16.2178	0.0199573	-0.191203	-0.09	0.125604	STD	0.6132	0.804403	0.79443	-3	3	0.603227	0.603227	1.03528	-0.0214829	0.603024	0.603024	-1.78	-0.272041	line2	-0.272041	-15	15
2021/07/20 03:19:41	ETH-3	488	STD	25	20887.7	22277.4	-139.388	-145.616	91	1.53592	0.00121801	7.18688	-1.50997	0.00245196	4.4938	0.00115335	11.9098	0.00248281	22.9753	0.0535695	-0.963077	9.83612	2.02139	-18.0902	0.0182723	16.2459	0.013067	-0.150557	-0.09	0.0848063	STD	0.6132	0.763757	0.77463	-3	3	0.624073	0.624073	1.03528	-0.0214829	0.624605	0.624605	-1.78	-0.270027	-0.270027	line1	-15	15	-1.61522
2021/07/20 05:18:06	ETH-3	488	STD	28	19464.4	20205.5	-132.396	-135.764	91	1.43985	0.00262744	6.72826	-1.96462	0.00597734	4.38784	0.00263285	11.4493	0.00605633	22.0597	0.0431204	-0.94813	20.6032	3.2613	-6.62222	0.0369767	15.6888	0.0225922	-0.142531	-0.09	0.115994	STD	0.6132	0.755731	0.759744	-3	3	0.617213	0.617213	1.03528	-0.0214829	0.617503	0.617503	-1.78	0.184624	line2	0.184624	-15	15
2021/07/20 09:07:17	ETH-3	488	STD	34	14738.8	15149.4	-107.167	-109.192	83	1.56606	0.00168721	7.22475	-1.47243	0.00218004	4.52335	0.00158216	11.9479	0.00220721	23.0921	0.0751761	-0.924248	54.0001	5.02712	24.7445	0.0935427	16.2828	0.0218245	-0.181551	-0.09	0.135419	STD	0.6132	0.794751	0.795858	-3	3	0.614307	0.614307	1.03528	-0.0214829	0.614495	0.614495	-1.78	-0.307572	line2	-0.307572	-15	14
2021/07/20 11:05:23	ETH-3	488	STD	37	16193.1	16568.1	-115.098	-117.252	76	1.51417	0.00197375	7.15923	-1.53738	0.00271291	4.47245	0.00190939	11.882	0.0027493	22.9932	0.060037	-0.89075	48.16	4.45035	19.2513	0.0830422	16.1624	0.0235323	-0.183765	-0.09	0.138856	STD	0.6132	0.796965	0.770935	-3	3	0.587169	0.587169	1.03528	-0.0214829	0.5864	0.5864	-1.78	-0.242625	-0.242625	line1	-15	11	-1.7937
2021/07/20 12:58:17	ETH-3	488	STD	40	17918.8	18410.5	-124.914	-127.69	81	1.22549	0.00120215	7.09417	-1.60187	0.00200512	4.1997	0.00113152	11.8161	0.00203024	22.9544	0.0521046	-0.798417	24.9222	3.64247	-2.92894	0.0432863	15.8898	0.020151	-0.107888	-0.09	0.124092	STD	0.6132	0.721088	0.759027	-3	3	0.651139	0.651139	1.03528	-0.0214829	0.652625	0.652625	-1.78	-0.178125	line2	-0.178125	-15	8
2021/07/20 16:50:00	ETH-3	488	STD	46	14121.5	14626.9	-103.74	-106.308	81	1.41081	0.00154382	6.92879	-1.76583	0.00201123	4.3676	0.00145205	11.6505	0.00203649	22.4897	0.0661948	-0.925347	33.1827	4.61061	5.25132	0.0578774	15.8515	0.023511	-0.157126	-0.09	0.143888	STD	0.6132	0.770326	0.770326	-3	0	0.6132	0.6132	1.03528	-0.0214829	0.613348	0.613348	-1.78	-0.0141722	line2	-0.0141722	-15	2
2021/07/20 20:34:38	ETH-3	489	STD	4	20101	20848.5	-137.113	-140.029	93	1.55618	0.00190498	7.12956	-1.5668	0.00233804	4.51078	0.0018258	11.8523	0.00236914	22.9775	0.0631948	-0.847372	38.45	1.9775	9.82669	0.0859447	16.1724	0.0187414	-0.184426	-0.09	0.112853	STD	0.6132	0.797626	0.783208	-3	3	0.598782	0.598782	1.03528	-0.0214829	0.598422	0.598422	-1.78	-0.213202	line2	-0.213202	-15	15
2021/07/20 22:31:12	ETH-3	489	STD	7	20487	21003.7	-138.533	-140.77	94	1.44144	0.00269287	6.84037	-1.85348	0.00805698	4.39322	0.00276056	11.5618	0.00816214	22.2874	0.0467791	-0.947887	44.7742	2.55213	16.6758	0.0997702	15.7922	0.0228066	-0.15559	-0.09	0.100019	STD	0.6132	0.76879	0.784637	-3	3	0.629047	0.629047	1.03528	-0.0214829	0.629755	0.629755	-1.78	0.0734847	0.0734847	line1	-15	15	-1.81947
2021/07/21 00:06:34	ETH-3	489	STD	10	15793.3	16381.4	-113.133	-116.246	76	1.55824	0.00115526	7.14767	-1.54884	0.00200012	4.51334	0.00108788	11.8705	0.00202518	23.0553	0.0635941	-0.807361	45.4773	2.6132	16.6219	0.0976421	16.2034	0.0180307	-0.174296	-0.109936	0.111512	STD	0.6132	0.787496	0.771504	-3	3	0.597207	0.597207	1.03528	-0.0214829	0.596792	0.596792	-1.78	-0.231159	line2	-0.231159	-15	15
2021/07/21 01:59:08	ETH-3	489	STD	13	20655.5	21376.3	-139.706	-142.636	92	1.56761	0.00177464	7.15031	-1.54622	0.00280476	4.52221	0.00170958	11.8732	0.00284143	22.9648	0.0603596	-0.900978	25.1188	2.05051	-3.18936	0.055848	16.245	0.0176896	-0.145025	-0.0766646	0.111077	STD	0.6132	0.758225	0.760162	-3	3	0.615137	0.615137	1.03528	-0.0214829	0.615354	0.615354	-1.78	-0.233778	-0.233778	line1	-15	15	-1.44959
2021/07/21 03:56:03	ETH-3	489	STD	16	21228	21995	-142.59	-145.835	94	1.551	0.00212897	7.11603	-1.58021	0.00220355	4.50546	0.00203718	11.8388	0.00223344	22.7417	0.0605514	-1.05093	27.524	2.67355	-0.766214	0.0610836	16.2173	0.0170561	-0.121565	-0.0620752	0.09929	STD	0.6132	0.734765	0.770556	-3	3	0.648991	0.648991	1.03528	-0.0214829	0.650402	0.650402	-1.78	-0.199793	line2	-0.199793	-15	15
2021/07/21 05:55:11	ETH-3	489	STD	19	22092.7	23189.4	-146.987	-151.51	95	1.45285	0.00201395	6.77626	-1.91705	0.00466012	4.40168	0.00202111	11.4975	0.00472167	21.9669	0.0454121	-1.13406	5.35074	2.107	-21.5733	0.0126324	15.6869	0.0168576	-0.205479	-0.111248	0.0980135	STD	0.6132	0.818679	0.779618	-3	3	0.574139	0.574139	1.03528	-0.0214829	0.57291	0.57291	-1.78	0.137046	0.137046	line1	-15	15	-1.8255
2021/07/21 07:52:36	ETH-3	489	STD	22	15992.3	16180.6	-115.473	-115.97	79	1.4326	0.00179901	7.00762	-1.68768	0.00198243	4.39075	0.0017061	11.7297	0.0020082	22.7031	0.0711159	-0.873186	42.9462	3.60295	14.5697	0.0902912	15.9385	0.0190242	-0.17221	-0.0842321	0.117443	STD	0.6132	0.78541	0.800444	-3	3	0.628233	0.628233	1.03528	-0.0214829	0.628912	0.628912	-1.78	-0.0923235	line2	-0.0923235	-15	15
2021/07/21 09:51:52	ETH-3	489	STD	25	20663.4	21908.2	-139.977	-145.65	92	1.36049	0.00296692	6.56438	-2.1271	0.00693544	4.30778	0.00298437	11.2846	0.00702712	21.7097	0.0561271	-0.965014	13.9204	2.35362	-12.727	0.0315568	15.4006	0.0207401	-0.184042	-0.125175	0.104414	STD	0.6132	0.797242	0.755634	-3	3	0.571592	0.571592	1.03528	-0.0214829	0.570273	0.570273	-1.78	0.347097	0.347097	line1	-15	15	-2.07458
2021/07/21 11:45:18	ETH-3	489	STD	28	19517.3	20219	-134.758	-137.552	91	1.52253	0.00177466	7.10747	-1.58869	0.00212221	4.47849	0.00167383	11.8301	0.00214916	22.7788	0.0481828	-0.997614	26.4032	2.57229	-1.81071	0.0582003	16.232	0.0203428	-0.0710504	-0.0562902	0.127043	STD	0.6132	0.68425	0.754869	-3	3	0.683818	0.683818	1.03528	-0.0214829	0.686458	0.686458	-1.78	-0.191309	line2	-0.191309	-15	15
2021/07/21 13:47:41	ETH-3	489	STD	31	26072.1	27644.5	-164.507	-170.432	105	1.49193	0.0032496	6.84782	-1.8461	0.00691048	4.44079	0.00326835	11.5694	0.00700295	22.013	0.0462131	-1.23101	-3.95448	1.87453	-30.8053	-0.00783669	15.8348	0.0187081	-0.169914	-0.144204	0.0754863	STD	0.6132	0.783114	0.741411	-3	3	0.571497	0.571497	1.03528	-0.0214829	0.570175	0.570175	-1.78	0.066103	0.066103	line1	-15	15	-1.74941
2021/07/21 15:43:12	ETH-3	489	STD	34	21056.9	21977.9	-141.914	-145.908	95	1.55076	0.00186874	7.10461	-1.59152	0.00182015	4.50484	0.0017711	11.8273	0.00184403	22.6688	0.0530702	-1.09948	13.3441	2.01276	-14.533	0.0301283	16.1829	0.0168344	-0.143669	-0.0973742	0.101183	STD	0.6132	0.756869	0.780819	-3	3	0.63715	0.63715	1.03528	-0.0214829	0.638143	0.638143	-1.78	-0.188475	line2	-0.188475	-15	15
2021/07/21 17:43:19	ETH-3	489	STD	37	20532	21379.9	-139.332	-143.134	90	1.52888	0.00164287	7.07656	-1.61934	0.0026184	4.48336	0.00158425	11.7991	0.00265267	22.5601	0.0583594	-1.14997	15.3157	2.68089	-12.5393	0.0347728	16.0863	0.0189826	-0.189273	-0.118526	0.111402	STD	0.6132	0.802473	0.804117	-3	3	0.614843	0.614843	1.03528	-0.0214829	0.61505	0.61505	-1.78	-0.160664	-0.160664	line1	-15	15	-1.51248
2021/07/21 19:35:32	ETH-3	489	STD	40	23486.2	24953.8	-154.058	-159.374	99	1.53509	0.00169575	7.10597	-1.59018	0.00305306	4.49021	0.00164805	11.8286	0.00309303	22.6039	0.0675125	-1.1655	4.56573	1.93602	-23.0574	0.0113235	16.0712	0.0172145	-0.239808	-0.0907084	0.10299	STD	0.6132	0.853008	0.831482	-3	3	0.591674	0.591674	1.03528	-0.0214829	0.591063	0.591063	-1.78	-0.189818	line2	-0.189818	-15	15
2021/07/21 21:36:14	ETH-3	489	STD	43	18835.6	19316.5	-130.469	-132.421	89	1.49865	0.00248679	6.90255	-1.79185	0.006243	4.44899	0.0025081	11.6244	0.00632504	22.2501	0.0542272	-1.1078	27.2593	3.38938	-0.548574	0.059349	15.8409	0.024927	-0.225766	0.198939	0.134619	STD	0.6132	0.838966	0.845356	-3	3	0.619591	0.619591	1.03528	-0.0214829	0.619965	0.619965	-1.78	0.0118454	0.0118454	line1	-15	15	-1.6976
2021/07/21 23:32:57	ETH-3	489	STD	46	16966.1	17606.2	-120.389	-124.091	81	1.53186	0.00151182	7.11652	-1.57972	0.00234692	4.48754	0.00142899	11.8392	0.00237659	22.9752	0.0632021	-0.823676	30.8196	2.69417	2.45699	0.0659504	16.088	0.019226	-0.230895	#DIV/0!	0.114814	STD	0.6132	0.844095	0.841531	-3	0	0.610635	0.610635	1.03528	-0.0214829	0.610693	0.610693	-1.78	-0.200277	line2	-0.200277	-15	15
2021/07/22 16:56:20	ETH-3	490	STD	4	16903.7	17017.7	-118.623	-119.101	81	1.5383	0.00134403	7.13752	-1.55891	0.00243954	4.49431	0.00128504	11.8603	0.00247073	23.2192	0.0684985	-0.627044	21.8474	2.84795	-6.31621	0.0489003	16.1617	0.0127582	-0.185801	-0.09	0.0729269	STD	0.6132	0.799001	0.79752	-3	3	0.611719	0.611719	1.03528	-0.0214829	0.611815	0.611815	-1.78	-0.221094	line2	-0.221094	-4	15
2021/07/22 18:45:00	ETH-3	490	STD	7	16061.2	16054.8	-113.95	-114.189	84	1.3794	0.00270154	6.64072	-2.05141	0.00675822	4.32815	0.00271656	11.3613	0.00684685	22.1143	0.054383	-0.720863	22.5158	3.65679	-4.52784	0.0492816	15.4987	0.0179326	-0.182838	-0.09	0.0951421	STD	0.6132	0.796038	0.823721	-3	3	0.640883	0.640883	1.03528	-0.0214829	0.642008	0.642008	-1.78	0.271414	0.271414	line1	-7	15	-1.87332
2021/07/22 20:28:42	ETH-3	490	STD	10	17149	17538.7	-120.394	-122.109	88	1.48684	0.00132215	7.10911	-1.58706	0.0024608	4.4451	0.00126072	11.8317	0.0024921	22.8651	0.0506632	-0.916425	18.312	2.66216	-9.64749	0.039895	16.0037	0.0214218	-0.262924	-0.09	0.131429	STD	0.6132	0.876124	0.832374	-3	3	0.56945	0.56945	1.03528	-0.0214829	0.568055	0.568055	-1.78	-0.192935	line2	-0.192935	-10	15
2021/07/22 22:20:33	ETH-3	490	STD	13	19704.1	20131.8	-134.378	-136.161	91	1.42405	0.00238022	6.73369	-1.95924	0.00421862	4.37322	0.00234433	11.4547	0.00427504	22.2188	0.054825	-0.8033	14.4141	2.75475	-12.6409	0.0316862	15.6086	0.0189675	-0.21176	-0.09	0.113073	STD	0.6132	0.82496	0.850542	-3	3	0.638782	0.638782	1.03528	-0.0214829	0.639833	0.639833	-1.78	0.179244	0.179244	line1	-13	15	-1.78115
2021/07/23 01:51:23	ETH-3	490	STD	19	17853.6	18107.1	-124.129	-125.37	88	1.46136	0.00254079	6.85637	-1.83762	0.0043778	4.41244	0.00250438	11.5779	0.00443666	22.4831	0.0589646	-0.788447	18.8478	3.33821	-8.60429	0.03995	15.7126	0.0198424	-0.269354	-0.09	0.119403	STD	0.6132	0.882554	0.852488	-3	3	0.583134	0.583134	1.03528	-0.0214829	0.582222	0.582222	-1.78	0.0576219	0.0576219	line1	-15	15	-1.67132
2021/07/23 03:39:03	ETH-3	490	STD	22	15346.3	15352.3	-110.653	-110.389	77	1.43871	0.00204034	7.00683	-1.68846	0.00229695	4.39645	0.00193869	11.7289	0.00232696	22.66	0.0688185	-0.913824	32.7164	3.71806	4.61354	0.0677829	15.9061	0.0190603	-0.209222	-0.09	0.108727	STD	0.6132	0.822422	0.836072	-3	3	0.62685	0.62685	1.03528	-0.0214829	0.62748	0.62748	-1.78	-0.0915404	line2	-0.0915404	-15	15
2021/07/23 05:23:33	ETH-3	490	STD	25	12384.7	12534.4	-92.984	-93.8595	75	1.50299	0.00192349	6.91095	-1.78352	0.00492101	4.45335	0.00191226	11.6328	0.00498485	22.6348	0.0812073	-0.748569	40.1663	3.23642	11.9883	0.084647	15.89	0.0184336	-0.19004	-0.09	0.11172	STD	0.6132	0.80324	0.779893	-3	3	0.589853	0.589853	1.03528	-0.0214829	0.589178	0.589178	-1.78	0.00351859	0.00351859	line1	-15	15	-1.63474
2021/07/23 06:41:14	ETH-3	490	STD	27	17006	16897	-119.963	-119.216	85	1.49252	0.00277886	6.93907	-1.75564	0.00546111	4.44451	0.00276193	11.661	0.00553399	22.6265	0.0589856	-0.812417	36.8638	4.32858	8.72875	0.0761797	15.9993	0.0169956	-0.100817	0.236788	0.0850844	STD	0.6132	0.714017	0.775386	-3	3	0.674569	0.674569	1.03528	-0.0214829	0.676882	0.676882	-1.78	-0.0243575	-0.0243575	line1	-15	15	-1.60686
2021/07/23 08:29:58	ETH-3	490	STD	30	15582.3	15726.5	-112.175	-112.66	84	1.37473	0.00155112	6.93981	-1.75491	0.00149571	4.33417	0.00146606	11.6615	0.0015151	22.5979	0.0585053	-0.841318	30.0647	3.93148	2.23167	0.0618001	15.7883	0.0146035	-0.1957	#DIV/0!	0.0919117	STD	0.6132	0.8089	0.761459	-3	0	0.565759	0.565759	1.03528	-0.0214829	0.564233	0.564233	-1.78	-0.0250915	line2	-0.0250915	-15	15
[truncated: 6 more columns]

## Sheet: ETH-2
Date	SA/STD	Run	ID	Row	Sa m44 [mV]	Ref m44 [mV]	Sa m54 [mV]	Ref m54 [mV]	Weight [μg]	d13C [‰]	d13C SE [‰]	d18O( gas) [‰]	d18Occ [‰]	d18Occ SE [‰]	d45 [‰]	d45 SE [‰]	d46 [‰]	d46 SE [‰]	d48 [‰]	d48 SE [‰]	Δ48 [‰]	d49 [‰]	d49 SE [‰]	Δ49 [‰]	49 parameter [-]	d47 [‰]	d47 SE [‰]	Δ47 Raw [‰]	Δ47 Raw offset correction [‰]	D47 SD [‰]	Type	Accepted values	Offset correction	Average offset correction [‰]	Range offset correction before	Range offset correction after	Offset corrected all [‰]	Offset corrected STDs [‰]	ETF slope [-]	ETF intercept [-]	Final (70 degree AF) [‰]	Final AFF [‰]	Accepted d18O	Offset d18O	Offset Line 1	Offset Line 2	d18O correction range	d18O correction range	Final 18O Offset Line1 corrected [‰]
2021/05/27 11:54:02	ETH-2	461	STD	2	14239	14084.6	-116.604	-115.465	94	-10.6135	0.00179891	-10.5959	-19.1392	0.00292169	-7.50813	0.00175257	-5.96485	0.00296054	-12.3248	0.0628739	-0.435899	-19.1304	3.00735	0.472112	-0.0395885	-14.1686	0.0183177	-0.612544	-0.642239	0.109372	STD	0.2085	non ETH-3	0.812716	-1	3	0.200172	0.200172	1.03528	-0.0214829	0.18575	0.18575	-18.69	0.449167	line2	0.449167	-15	15
2021/05/27 23:19:36	ETH-2	461	STD	21	19709.8	19556	-145.958	-145.037	90	-10.5826	0.00303007	-10.6408	-19.1837	0.00335859	-7.48075	0.00292625	-6.00983	0.00340515	-12.6985	0.056114	-0.72368	-7.7735	3.75836	12.1155	-0.01692	-14.1407	0.0206349	-0.568304	-0.483702	0.10967	STD	0.2085	non ETH-3	0.793439	-3	3	0.225135	0.225135	1.03528	-0.0214829	0.211594	0.211594	-18.69	0.493662	0.493662	line1	-15	15	-18.9214
2021/05/28 17:03:11	ETH-2	462	STD	2	19819.7	19630.2	-147.86	-145.99	87	-10.556	0.00213603	-10.5233	-19.0672	0.00286138	-7.45175	0.00207147	-5.8919	0.00290016	-12.6184	0.048117	-0.879698	-31.7449	3.51467	-12.5971	-0.0673051	-14.032	0.0187502	-0.604731	-0.525447	0.102392	STD	0.2085	non ETH-3	0.805897	-1	3	0.201166	0.201166	1.03528	-0.0214829	0.186779	0.186779	-18.69	0.377234	line2	0.377234	-15	15
2021/05/31 12:55:49	ETH-2	463	STD	2	21739.1	21568.3	-162.334	-160.769	97	-10.5791	0.00247382	-10.6416	-19.1845	0.00356305	-7.4775	0.00240763	-6.01069	0.00361116	-12.6958	0.0496676	-0.719224	0.50097	2.95721	20.5543	0.00207812	-14.0949	0.0232375	-0.524402	-0.511785	0.126018	STD	0.2085	non ETH-3	0.815362	-1	3	0.29096	0.29096	1.03528	-0.0214829	0.279741	0.279741	-18.69	0.494514	line2	0.494514	-15	15
2021/05/31 23:59:56	ETH-2	463	STD	21	22397	22284.1	-163.906	-162.171	95	-10.6108	0.00271593	-10.7589	-19.3008	0.00423278	-7.51124	0.00267701	-6.12846	0.00429064	-13.0752	0.0523646	-0.866435	-19.7788	3.33212	0.136793	-0.0465426	-14.2927	0.0229749	-0.573425	-0.465573	0.11987	STD	0.2085	non ETH-3	0.816292	-3	3	0.242867	0.242867	1.03528	-0.0214829	0.229951	0.229951	-18.69	0.610775	0.610775	line1	-15	15	-18.8598
2021/06/02 11:21:51	ETH-2	464	STD	2	19144.7	18911.8	-150.149	-148.346	87	-10.6579	0.00211655	-10.8894	-19.4301	0.0041719	-7.55987	0.00209132	-6.25954	0.00422716	-13.1115	0.0477417	-0.639684	-17.5918	2.91716	2.68099	-0.0296621	-14.3902	0.0190068	-0.492153	-0.469228	0.103512	STD	0.2085	non ETH-3	0.77902	-1	3	0.286867	0.286867	1.03528	-0.0214829	0.275504	0.275504	-18.69	0.74014	line2	0.74014	-15	15
2021/06/03 13:54:06	ETH-2	465	STD	2	23341.6	23272.5	-169.732	-168.864	87	-10.5747	0.00228702	-10.5958	-19.1391	0.00433607	-7.47172	0.00225927	-5.96472	0.00439377	-12.6032	0.0464895	-0.717985	-9.74415	2.60278	10.0058	-0.0258865	-14.0959	0.0235091	-0.576852	-0.521364	0.13312	STD	0.2085	non ETH-3	0.825083	-1	3	0.248231	0.248231	1.03528	-0.0214829	0.235505	0.235505	-18.69	0.449121	line2	0.449121	-15	15
2021/06/04 01:04:20	ETH-2	465	STD	21	24414.3	24610.9	-173.687	-174.156	99	-10.6138	0.00232413	-10.7347	-19.2768	0.00446527	-7.51325	0.00230646	-6.10422	0.00452494	-12.836	0.0495265	-0.673092	-8.56798	2.28339	11.5296	-0.020817	-14.304	0.0190897	-0.606768	-0.487444	0.10281	STD	0.2085	non ETH-3	0.821711	-3	3	0.214943	0.214943	1.03528	-0.0214829	0.201043	0.201043	-18.69	0.586826	0.586826	line1	-15	15	-18.9069
2021/06/04 14:46:50	ETH-2	465	STD	41	23558.8	23642.5	-170.033	-169.271	97	-10.736	0.00354868	-11.0713	-19.6105	0.00782086	-7.63942	0.00357546	-6.44234	0.00792518	-13.6302	0.0630861	-0.797362	-12.942	2.70114	7.87608	-0.0353828	-14.663	0.024776	-0.505394	-0.09	0.115815	STD	0.2085	non ETH-3	0.774983	-3	0	0.269589	0.269589	1.03528	-0.0214829	0.257616	0.257616	-18.69	0.92052	0.92052	line1	-15	2	-19.3263
2021/06/05 06:14:04	ETH-2	466	STD	21	15912	15775.6	-126.656	-126.183	81	-10.3341	0.00238959	-9.99522	-18.5437	0.00315496	-7.22544	0.00231184	-5.36137	0.00319756	-11.2801	0.0679178	-0.592538	24.1806	4.31044	43.0864	0.0506109	-13.2113	0.0184215	-0.532521	-0.468199	0.113894	STD	0.2085	non ETH-3	0.761953	-3	3	0.229432	0.229432	1.03528	-0.0214829	0.216042	0.216042	-18.69	-0.146292	-0.146292	line1	-15	15	-18.4804
2021/06/05 19:55:18	ETH-2	466	STD	45	14601.9	14498	-118.281	-117.417	77	-10.627	0.00181121	-10.6281	-19.1712	0.00241187	-7.52184	0.00173236	-5.99727	0.00244347	-12.7851	0.061166	-0.836611	-14.5831	3.45307	5.18961	-0.0315615	-14.2469	0.0192964	-0.645629	-0.546543	0.124409	STD	0.2085	non ETH-3	0.799003	-3	1	0.153374	0.153374	1.03528	-0.0214829	0.137301	0.137301	-18.69	0.481164	0.481164	line1	-15	15	-18.6012
2021/06/07 12:22:47	ETH-2	467	STD	2	15019.7	14888.5	-122.843	-122.192	81	-10.6226	0.00197646	-10.7544	-19.2964	0.00266861	-7.52219	0.00192265	-6.12404	0.002705	-12.5346	0.0745794	-0.328111	22.6087	4.76778	43.389	0.0499	-14.2781	0.0236949	-0.551627	-0.490119	0.142929	STD	0.2085	non ETH-3	0.771832	-1	3	0.220205	0.220205	1.03528	-0.0214829	0.20649	0.20649	-18.69	0.606378	line2	0.606378	-2	15
2021/06/07 23:11:18	ETH-2	467	STD	21	21606.9	21651.6	-160.246	-159.707	97	-10.5981	0.00247699	-10.6611	-19.2038	0.00303875	-7.49592	0.00241232	-6.03026	0.0030811	-12.8759	0.0543792	-0.862183	-21.1603	3.02197	-1.48261	-0.0485258	-14.2079	0.019423	-0.600469	-0.500617	0.107495	STD	0.2085	non ETH-3	0.794378	-3	3	0.193909	0.193909	1.03528	-0.0214829	0.179267	0.179267	-18.69	0.513802	0.513802	line1	-15	15	-18.7837
2021/06/08 14:32:26	ETH-2	467	STD	45	16708.2	16599.2	-130.764	-130.279	81	-10.905	0.00201892	-11.4321	-19.9682	0.00259182	-7.81035	0.001941	-6.80485	0.00262639	-14.1836	0.0591972	-0.628835	-14.9586	2.56896	6.72456	-0.0371729	-15.3139	0.0187863	-0.629661	-0.529837	0.109112	STD	0.2085	non ETH-3	0.785151	-3	1	0.15549	0.15549	1.03528	-0.0214829	0.139492	0.139492	-18.69	1.27821	1.27821	line1	-15	2	-19.5665
2021/06/08 18:05:48	ETH-2	468	STD	2	24743.3	25040.9	-175.845	-175.744	95	-10.8556	0.00250521	-11.2864	-19.8237	0.00411852	-7.75898	0.00246765	-6.65844	0.00417424	-14.0704	0.0449288	-0.8087	-24.912	2.22697	-3.79181	-0.0563414	-15.0533	0.0158457	-0.563373	-0.49936	0.0799269	STD	0.2085	non ETH-3	0.815352	-1	3	0.25198	0.25198	1.03528	-0.0214829	0.239386	0.239386	-18.69	1.13371	line2	1.13371	-15	15
2021/06/09 04:38:31	ETH-2	468	STD	21	13248.7	13088.5	-109.311	-108.349	88	-10.5883	0.00250913	-10.6113	-19.1545	0.00234829	-7.48503	0.00239781	-5.98031	0.00238053	-12.6475	0.0730249	-0.731393	10.8772	4.45107	31.0851	0.0224782	-14.1508	0.0215873	-0.60327	-0.53314	0.133126	STD	0.2085	non ETH-3	0.827878	-3	3	0.224609	0.224609	1.03528	-0.0214829	0.211049	0.211049	-18.69	0.464488	0.464488	line1	-15	15	-18.8174
2021/06/09 18:19:49	ETH-2	468	STD	45	16855.9	16671.6	-131.295	-130.179	97	-10.591	0.00227023	-10.6265	-19.1695	0.00321753	-7.48809	0.00220219	-5.99555	0.00326077	-12.7236	0.0559463	-0.777833	-16.0452	3.59885	3.65789	-0.0344614	-14.1994	0.0171297	-0.634261	#DIV/0!	0.0992404	STD	0.2085	non ETH-3	0.862166	-3	1	0.227905	0.227905	1.03528	-0.0214829	0.214461	0.214461	-18.69	0.479535	0.479535	line1	-15	15	-18.7844
2021/06/10 12:22:26	ETH-2	469	STD	2	21227.9	21201.6	-157.625	-157.418	94	-10.6939	0.00224974	-10.8947	-19.4354	0.00320043	-7.59382	0.00218961	-6.26499	0.00324373	-13.2228	0.0613499	-0.741432	-3.30699	3.56097	17.3085	-0.00608973	-14.4394	0.019554	-0.501331	-0.502513	0.106946	STD	0.2085	non ETH-3	0.702374	-1	3	0.201043	0.201043	1.03528	-0.0214829	0.186652	0.186652	-18.69	0.74545	line2	0.74545	-1	15
2021/06/10 22:44:02	ETH-2	469	STD	21	11088.5	10838.1	-94.181	-92.58	76	-10.5271	0.00233763	-10.439	-18.9836	0.00297645	-7.42172	0.00224824	-5.8072	0.00301623	-12.4425	0.0674054	-0.872035	-12.5142	4.32485	6.81291	-0.033456	-13.9756	0.0239921	-0.662484	-0.09	0.139222	STD	0.2085	non ETH-3	0.84375	-3	1	0.181265	0.181265	1.03528	-0.0214829	0.166177	0.166177	-18.69	0.293641	0.293641	line1	-15	15	-18.6253
2021/06/11 18:49:26	ETH-2	470	STD	2	23630.5	23839.8	-169.966	-170.591	99	-10.5857	0.00192062	-10.6286	-19.1716	0.00381157	-7.48323	0.00190571	-5.9976	0.00386226	-12.4811	0.0634257	-0.528278	-4.97915	1.81451	14.9448	-0.0141511	-14.1497	0.0192368	-0.586875	-0.549787	0.118487	STD	0.2085	non ETH-3	0.886931	-1	5	0.300056	0.300056	1.03528	-0.0214829	0.289158	0.289158	-18.69	0.481577	line2	0.481577	-15	15
2021/06/14 18:14:43	ETH-2	471	STD	2	19062.6	19036.6	-143.896	-143.615	88	-10.4781	0.00243353	-10.3858	-18.9309	0.00354874	-7.37391	0.00235705	-5.75373	0.00359608	-11.9319	0.0671297	-0.462892	7.42412	3.0746	26.9803	0.018971	-13.7799	0.0190838	-0.566707	-0.469177	0.102788	STD	0.2085	non ETH-3	0.895016	-1	3	0.328309	0.328309	1.03528	-0.0214829	0.318407	0.318407	-18.69	0.24093	line2	0.24093	-15	15
2021/06/15 19:32:44	ETH-2	471	STD	45	20521.1	20893.2	-150.979	-152.894	93	-10.4452	0.00154824	-10.2553	-18.8016	0.00255263	-7.33861	0.00150383	-5.62268	0.00258634	-11.8951	0.0500746	-0.689123	-8.54546	2.23505	10.4012	-0.0189418	-13.636	0.0189885	-0.587004	#DIV/0!	0.116656	STD	0.2085	non ETH-3	0.831255	-3	1	0.244251	0.244251	1.03528	-0.0214829	0.231384	0.231384	-18.69	0.111568	0.111568	line1	-15	15	-18.8271
2021-06-16 12:19:12	ETH-2	472	STD	2	21138.4	20862.6	-154.083	-151.948	95	-10.3901	0.00216747	-10.137	-18.6843	0.00286676	-7.28283	0.00210225	-5.50379	0.0029057	-11.7066	0.0532163	-0.737464	-15.3345	2.92638	3.18621	-0.0341158	-13.3948	0.0185077	-0.518133	-0.535774	0.102909	STD	0.2085	non ETH-3	0.70561	-1	3	0.187477	0.187477	1.03528	-0.0214829	0.172608	0.172608	-18.69	-0.00574871	line2	-0.00574871	-15	15
2021-06-16 23:18:30	ETH-2	472	STD	21	14911.8	14468.4	-117.803	-115.359	77	-10.3938	0.00233062	-10.1469	-18.6941	0.0039136	-7.28663	0.00228748	-5.51374	0.00396606	-11.7499	0.0734534	-0.76132	-1.25177	4.86548	17.5571	-0.00327272	-13.5182	0.02445	-0.62929	-0.529569	0.138425	STD	0.2085	non ETH-3	0.805965	-3	3	0.176676	0.176676	1.03528	-0.0214829	0.161425	0.161425	-18.69	0.00407357	0.00407357	line1	-15	15	-18.8343
2021-06-17 12:11:49	ETH-2	472	STD	44	17912.6	17579.8	-136.39	-134.087	82	-10.5011	0.00302105	-10.5048	-19.0489	0.00619906	-7.3996	0.0030228	-5.87317	0.00628195	-12.4336	0.0575352	-0.730422	-14.9239	3.41211	4.46241	-0.0332606	-13.8513	0.0260886	-0.49432	-660.724	0.129487	STD	0.2085	non ETH-3	0.747556	-6	6	0.253236	0.253236	1.03528	-0.0214829	0.240686	0.240686	-18.69	0.358852	line2	0.358852	-15	15
2021-06-17 18:32:36	ETH-2	473	STD	2	16885.5	16705.2	-129.964	-128.982	92	-10.4677	0.0015488	-10.3021	-18.848	0.00251147	-7.36125	0.0014969	-5.66969	0.00254441	-11.8058	0.0589189	-0.504285	-0.54481	2.99577	18.674	-0.000899956	-13.6898	0.0209813	-0.571567	-0.527309	0.129359	STD	0.2085	non ETH-3	0.747556	-9	3	0.175989	0.175989	1.03528	-0.0214829	0.160714	0.160714	-18.69	0.157951	line2	0.157951	-15	15
2021-06-18 10:22:24	ETH-2	473	STD	29	21914.5	22240.1	-157.392	-158.904	93	-10.4073	0.00198881	-10.2274	-18.7739	0.00269226	-7.30211	0.00191952	-5.59457	0.00272826	-11.9331	0.0649153	-0.784069	-15.2196	2.38819	3.50432	-0.0355942	-13.5783	0.0180986	-0.594296	#DIV/0!	0.103358	STD	0.2085	non ETH-3	0.788541	-3	1	0.194245	0.194245	1.03528	-0.0214829	0.179615	0.179615	-18.69	0.0838848	0.0838848	line1	-15	15	-18.8677
2021-06-18 13:22:17	ETH-2	474	STD	2	19841.2	19831.9	-147.537	-146.987	91	-10.4562	0.0020759	-10.3151	-18.8608	0.00286841	-7.35098	0.00202	-5.68267	0.0029074	-12.1039	0.0486219	-0.77974	-6.20206	3.86908	12.9223	-0.0119109	-13.5981	0.0189977	-0.476535	-0.457333	0.107955	STD	0.2085	non ETH-3	0.779415	-3	3	0.302881	0.302881	1.03528	-0.0214829	0.292082	0.292082	-18.69	0.170796	line2	0.170796	-15	15
2021-06-19 12:40:16	ETH-2	474	STD	44	23811.2	24212.9	-167.143	-168.269	102	-10.4396	0.00148911	-10.2285	-18.775	0.00261926	-7.33239	0.00144466	-5.59574	0.00265355	-12.025	0.0417691	-0.874672	-21.9798	1.56942	-3.34952	-0.0487838	-13.604	0.0203004	-0.58769	-1.99913	0.116584	STD	0.2085	non ETH-3	0.75973	-3	2	0.17204	0.17204	1.03528	-0.0214829	0.156627	0.156627	-18.69	0.0849639	line2	0.0849639	-15	15
2021-06-21 12:51:10	ETH-2	475	STD	2	19827.1	19840.5	-144.319	-144.275	87	-10.3768	0.00170655	-10.1289	-18.6762	0.0021297	-7.27008	0.00161458	-5.49566	0.00215694	-11.6759	0.0547897	-0.722784	-11.5843	2.23963	6.97752	-0.0209852	-13.3179	0.0164342	-0.461456	-0.435212	0.0994016	STD	0.2085	non ETH-3	0.718445	-1	3	0.256989	0.256989	1.03528	-0.0214829	0.244572	0.244572	-18.69	-0.0137507	line2	-0.0137507	-15	15
2021-06-21 23:49:06	ETH-2	475	STD	21	19317.8	19345	-142.161	-142.077	86	-10.4287	0.00248707	-10.3449	-18.8903	0.00549453	-7.32619	0.00249544	-5.71253	0.00556749	-12.1133	0.0456403	-0.72919	-12.2194	3.48581	6.82124	-0.0230074	-13.7212	0.0249192	-0.597437	-0.46092	0.127206	STD	0.2085	non ETH-3	0.833966	-3	3	0.236529	0.236529	1.03528	-0.0214829	0.22339	0.22339	-18.69	0.200347	0.200347	line1	-15	15	-19.0418
2021-06-22 17:06:40	ETH-2	476	STD	2	19201.5	19175.1	-141.815	-141.097	86	-10.3671	0.00190641	-10.0743	-18.6221	0.00242515	-7.25914	0.00182592	-5.44085	0.0024572	-11.692	0.0508941	-0.849175	-18.3552	2.25596	-0.0407092	-0.0415404	-13.4768	0.0179168	-0.68796	-0.581937	0.103986	STD	0.2085	non ETH-3	0.820148	-1	3	0.132188	0.132188	1.03528	-0.0214829	0.115368	0.115368	-18.69	-0.0678658	line2	-0.0678658	-15	15
2021-06-23 04:25:14	ETH-2	476	STD	21	15395.3	15329.2	-119.65	-119.612	76	-10.3725	0.00241357	-10.1011	-18.6487	0.00280704	-7.26511	0.00232231	-5.46775	0.00284513	-11.5096	0.0724693	-0.610785	0.535465	4.84533	19.2624	0.000351147	-13.4401	0.0194281	-0.618024	-0.530978	0.112151	STD	0.2085	non ETH-3	0.78204	-3	3	0.164016	0.164016	1.03528	-0.0214829	0.148319	0.148319	-18.69	-0.04131	-0.04131	line1	-15	15	-18.7923
2021-06-23 18:17:47	ETH-2	476	STD	45	17984.7	17848	-134.608	-133.583	82	-10.3723	0.00195449	-10.1217	-18.6691	0.0025652	-7.26559	0.00188895	-5.48837	0.00259977	-11.6904	0.0591247	-0.752047	-4.2877	2.99914	14.3913	-0.00948496	-13.4506	0.0190876	-0.607724	#DIV/0!	0.107413	STD	0.2085	non ETH-3	0.798876	-3	1	0.191151	0.191151	1.03528	-0.0214829	0.176412	0.176412	-18.69	-0.0209427	-0.0209427	line1	-15	15	-18.8063
2021-06-24 12:07:48	ETH-2	477	STD	2	18691.8	18456.2	-136.117	-134.743	94	-10.3549	0.00190523	-10.1054	-18.6529	0.00276207	-7.2488	0.00184443	-5.47198	0.0027989	-11.5727	0.0500843	-0.666012	-11.5159	3.60149	6.97659	-0.0214049	-13.3898	0.0168365	-0.579779	-0.554137	0.101005	STD	0.2085	non ETH-3	0.767816	-1	3	0.188037	0.188037	1.03528	-0.0214829	0.173187	0.173187	-18.69	-0.0370873	line2	-0.0370873	-15	15
2021-06-24 23:01:13	ETH-2	477	STD	21	19505.1	19269.2	-142.634	-140.702	86	-10.3665	0.00152662	-10.0874	-18.6351	0.00349012	-7.25903	0.00152235	-5.45395	0.003536	-11.5522	0.0610282	-0.681568	-19.0219	3.79347	-0.694568	-0.0333991	-13.4451	0.0211386	-0.643029	-0.537751	0.123332	STD	0.2085	non ETH-3	0.808787	-3	3	0.165758	0.165758	1.03528	-0.0214829	0.150123	0.150123	-18.69	-0.0549196	-0.0549196	line1	-15	15	-18.8159
2021-06-25 12:30:56	ETH-2	477	STD	45	19467.9	19686.6	-142.522	-143.653	87	-10.3632	0.00210453	-10.0936	-18.6412	0.00271349	-7.25609	0.00204477	-5.46015	0.00275068	-11.6727	0.0595104	-0.790833	-15.6609	2.90853	2.73861	-0.027652	-13.3624	0.0201164	-0.556153	-0.09	0.116195	STD	0.2085	non ETH-3	0.787936	-3	1	0.231782	0.231782	1.03528	-0.0214829	0.218476	0.218476	-18.69	-0.0487878	-0.0487878	line1	-15	15	-18.7918
2021-06-25 15:59:20	ETH-2	478	STD	2	17945.7	18089.9	-134.33	-134.909	87	-10.3883	0.00183117	-10.1451	-18.6922	0.00251094	-7.28146	0.00176544	-5.51187	0.00254437	-11.6253	0.0527084	-0.638984	-11.2697	3.20543	7.34219	-0.0241033	-13.4196	0.0176103	-0.536654	-0.79213	0.102777	STD	0.2085	non ETH-3	0.699103	-1	3	0.162449	0.162449	1.03528	-0.0214829	0.146697	0.146697	-18.69	0.00224098	line2	0.00224098	-15	15
2021-06-26 02:47:24	ETH-2	478	STD	21	15896.5	15795.5	-121.931	-121.58	88	-10.3802	0.00191123	-10.1257	-18.6731	0.00309742	-7.27321	0.00186216	-5.49247	0.00313863	-11.6125	0.0540906	-0.665045	6.44959	3.96158	25.3463	0.0141918	-13.4812	0.0206053	-0.626766	-0.552839	0.123158	STD	0.2085	non ETH-3	0.795346	-3	3	0.16858	0.16858	1.03528	-0.0214829	0.153043	0.153043	-18.69	-0.0169041	-0.0169041	line1	-15	15	-18.795
2021-06-26 16:35:05	ETH-2	478	STD	45	15621.4	15455.9	-120.083	-119.262	80	-10.3701	0.00175808	-10.0838	-18.6315	0.00282726	-7.26223	0.00169845	-5.45032	0.00286435	-11.6176	0.0703815	-0.754948	-13.8002	3.29523	4.62118	-0.0313146	-13.4383	0.0193931	-0.636334	-0.09	0.117932	STD	0.2085	non ETH-3	0.794231	-3	1	0.157896	0.157896	1.03528	-0.0214829	0.141983	0.141983	-18.69	-0.0585123	-0.0585123	line1	-15	15	-18.7502
2021-06-28 11:40:08	ETH-2	479	STD	2	22150.3	22288.5	-151.517	-152.323	94	-10.3859	0.00136654	-10.1166	-18.664	0.00206338	-7.27815	0.00131503	-5.48329	0.00209043	-11.4718	0.0469662	-0.541284	-17.7759	2.03071	0.653733	-0.0330318	-13.3412	0.012224	-0.488941	-0.465418	0.0779762	STD	0.2085	non ETH-3	0.747145	-1	3	0.258205	0.258205	1.03528	-0.0214829	0.24583	0.24583	-18.69	-0.0259804	line2	-0.0259804	-15	15
2021-06-28 22:53:39	ETH-2	479	STD	21	19567.3	19409.8	-141.572	-140.185	86	-10.4866	0.00326343	-10.5201	-19.0641	0.00614684	-7.38658	0.00325134	-5.88854	0.00622963	-12.4369	0.0657574	-0.70285	-12.312	3.71721	7.14205	-0.02051	-13.9409	0.0226472	-0.58349	-0.473882	0.119613	STD	0.2085	non ETH-3	0.808243	-3	3	0.224752	0.224752	1.03528	-0.0214829	0.211198	0.211198	-18.69	0.374067	0.374067	line1	-15	15	-19.1204
2021-06-29 12:15:01	ETH-2	479	STD	45	16182.4	16166.5	-122.388	-122.319	81	-10.3718	0.00201957	-10.1146	-18.6621	0.002503	-7.26492	0.0019232	-5.4813	0.00253564	-11.713	0.0717059	-0.789123	-8.09592	3.92046	10.497	-0.0143552	-13.4077	0.0152292	-0.571942	-637.258	0.0905899	STD	0.2085	non ETH-3	0.77396	-3	1	0.202018	0.202018	1.03528	-0.0214829	0.187662	0.187662	-18.69	-0.0279202	-0.0279202	line1	-15	15	-18.7994
2021-06-29 15:35:52	ETH-2	480	STD	2	17481.7	17501.5	-129.662	-130.086	91	-10.383	0.0021249	-10.1363	-18.6836	0.00302802	-7.27619	0.00207265	-5.50311	0.00306918	-11.7926	0.0610648	-0.8258	-11.1643	3.8675	7.42619	-0.0238462	-13.443	0.0169868	-0.574498	-0.526956	0.0938544	STD	0.2085	non ETH-3	0.819027	-1	3	0.244529	0.244529	1.03528	-0.0214829	0.231672	0.231672	-18.69	-0.00640595	line2	-0.00640595	-15	15
2021-06-30 02:47:44	ETH-2	480	STD	21	19198	19114.5	-140.304	-139.633	92	-10.3822	0.00203	-10.1164	-18.6638	0.00260685	-7.2747	0.00195339	-5.48307	0.00264169	-11.7422	0.0640784	-0.815145	-14.3043	3.55309	4.18595	-0.0292529	-13.4131	0.0175391	-0.56551	-0.433289	0.10464	STD	0.2085	non ETH-3	0.828366	-3	3	0.262856	0.262856	1.03528	-0.0214829	0.250645	0.250645	-18.69	-0.0261942	-0.0261942	line1	-15	15	-18.8228
2021-07-01 07:32:04	ETH-2	481	STD	2	21840.6	22511.7	0	0	104	-10.3979	0.00158432	0	-18.7405	0.0023304	-7.29126	0.00153975	-5.51968	0.00236166	-11.4833	0.0536475	-0.479742	58.0998	2.88008	78.0474	0.0668088	-13.3921	0.0166737	-0.490171	0	0.100629	STD	0.2085	non ETH-3	0.817225	-6	6	0.327055	0.327055	1.03528	-0.0214829	0.317109	0.317109	-18.69	0.050494	line2	0.050494	-15	15
2021-07-01 07:32:04	ETH-2	481	STD	21	19965.2	20282.6	0	0	89	-10.3996	0.00178842	0	-18.799	0.00274101	-7.29492	0.00175416	-5.57892	0.00277822	-11.8949	0.0610045	-0.776905	-11.7665	5.12622	6.98502	-0.0285601	-13.5338	0.022113	-0.571324	0	0.128338	STD	0.2085	non ETH-3	0.780515	-3	3	0.209192	0.209192	1.03528	-0.0214829	0.195088	0.195088	-18.69	0.108999	0.108999	line1	-15	15	-18.8532
2021-07-01 07:32:04	ETH-2	481	STD	30	16293.5	16479.9	0	0	78	-10.3837	0.00148724	0	-18.7242	0.00181113	-7.27743	0.00142153	-5.5032	0.00183505	-11.7532	0.0639154	-0.785753	-1.5341	5.32821	17.2409	-0.00651014	-13.4449	0.0164424	-0.574289	0	0.100832	STD	0.2085	non ETH-3	0.80562	-3	1	0.231331	0.231331	1.03528	-0.0214829	0.218008	0.218008	-18.69	0.0342441	line2	0.0342441	-15	15
2021-07-02 10:08:29	ETH-2	482	STD	2	19998.4	20327.2	0	0	87	-10.3838	0.00200075	0	-18.733	0.00251678	-7.27787	0.00193215	-5.51207	0.00255085	-11.7678	0.0521497	-0.782757	-15.0835	4.26816	3.4545	-0.0441888	-13.4309	0.0211771	-0.550901	0	0.119994	STD	0.2085	non ETH-3	0.805346	-1	3	0.254445	0.254445	1.03528	-0.0214829	0.241938	0.241938	-18.69	0.0430026	line2	0.0430026	-15	15
2021/07/06 19:25:52	ETH-2	484	STD	2	16648.7	16751.1	-121.963	-123.126	84	-10.3614	0.00195336	-10.1128	-18.6603	0.00225043	-7.25513	0.00186934	-5.47949	0.00228047	-11.7159	0.0818098	-0.795749	24.3026	5.17993	43.4876	0.0594219	-13.4404	0.0217216	-0.617045	-0.427303	0.129721	STD	0.2085	non ETH-3	0.887539	-6	6	0.270494	0.270494	1.03528	-0.0214829	0.258553	0.258553	-18.69	-0.0296909	line2	-0.0296909	-15	15
2021/07/07 16:41:25	ETH-2	484	STD	21	19029.9	19293.2	-135.805	-136.549	84	-10.4027	0.00193101	-10.2583	-18.8045	0.00304614	-7.29887	0.00188673	-5.62558	0.00308703	-12.1639	0.0512479	-0.955119	-7.13358	3.73752	11.8021	-0.0170113	-13.5682	0.0195226	-0.556795	-0.496796	0.111232	STD	0.2085	non ETH-3	0.779879	-3	3	0.223084	0.223084	1.03528	-0.0214829	0.209471	0.209471	-18.69	0.114521	0.114521	line1	-15	15	-18.8788
2021/07/08 11:21:56	ETH-2	485	STD	2	27816	28818.3	-178.608	-182.174	109	-10.4551	0.00301062	-10.3187	-18.8644	0.00464867	-7.35003	0.00295462	-5.6863	0.0047118	-12.0329	0.0516767	-0.700627	-1.15626	2.94148	18.0711	-0.00190019	-13.6688	0.0229771	-0.545513	-1.61514	0.123601	STD	0.2085	non ETH-3	0.771668	-1	3	0.226154	0.226154	1.03528	-0.0214829	0.212649	0.212649	-18.69	0.174384	line2	0.174384	-15	15
2021/07/09 02:09:33	ETH-2	485	STD	21	21064.8	21390.1	-147.019	-147.831	97	-10.4448	0.00243128	-10.2773	-18.8234	0.00247644	-7.33899	0.00233686	-5.64478	0.00251074	-12.0138	0.060947	-0.764786	14.9065	3.47016	34.3464	0.0377629	-13.6229	0.0234258	-0.551545	-0.09	0.135311	STD	0.2085	non ETH-3	0.811085	-6	6	0.259539	0.259539	1.03528	-0.0214829	0.247212	0.247212	-18.69	0.133396	0.133396	line1	-15	15	-18.8101
2021/07/09 15:12:00	ETH-2	485	STD	45	16055.1	16284.5	-119.315	-120.145	76	-10.4452	0.0017155	-10.3309	-18.8765	0.00305403	-7.34123	0.00166569	-5.69851	0.003094	-12.1533	0.0548622	-0.797916	-5.7231	3.36556	13.432	-0.0138563	-13.6961	0.0204475	-0.570275	-0.09	0.129037	STD	0.2085	non ETH-3	0.764054	-3	1	0.193779	0.193779	1.03528	-0.0214829	0.179132	0.179132	-18.69	0.186465	0.186465	line1	-15	15	-18.9501
2021/07/15 16:34:00	ETH-2	487	STD	2	17935.6	17988.4	-121.184	-121.486	82	-10.344	0.00108201	-10.0762	-18.624	0.00176415	-7.23749	0.00101509	-5.44266	0.00178613	-11.5767	0.0616646	-0.72901	-9.40536	3.15701	9.05641	-0.0176772	-13.3239	0.0200778	-0.553708	-0.541049	0.124311	STD	0.2085	non ETH-3	0.728988	-1	3	0.17528	0.17528	1.03528	-0.0214829	0.15998	0.15998	-18.69	-0.0660227	line2	-0.0660227	-15	15
2021/07/16 04:48:41	ETH-2	487	STD	21	19333.7	19244.2	-132.096	-131.536	84	-10.3338	0.00223917	-10.0347	-18.5828	0.00254853	-7.22651	0.0021683	-5.401	0.00258399	-11.6498	0.0582464	-0.886605	-3.32976	4.58429	15.1488	-0.00519813	-13.3077	0.0213666	-0.589944	-0.528726	0.122877	STD	0.2085	non ETH-3	0.784289	-3	3	0.194346	0.194346	1.03528	-0.0214829	0.179719	0.179719	-18.69	-0.107157	-0.107157	line1	-15	15	-18.7425
2021/07/19 12:36:40	ETH-2	488	STD	2	15977.6	16182.2	-110.778	-111.62	76	-10.3432	0.00155626	-10.041	-18.5891	0.00193802	-7.23558	0.00148116	-5.40737	0.00196323	-11.6081	0.0605541	-0.831585	-10.9786	2.7643	7.38148	-0.0209865	-13.2636	0.0233306	-0.529507	-0.497925	0.146309	STD	0.2085	non ETH-3	0.75092	-1	3	0.221413	0.221413	1.03528	-0.0214829	0.207741	0.207741	-18.69	-0.100881	line2	-0.100881	-15	15
2021/07/20 00:47:16	ETH-2	488	STD	21	17951.8	18206.2	-123.86	-124.706	92	-10.3858	0.00222855	-10.2253	-18.7718	0.00434614	-7.28191	0.00220534	-5.59238	0.00440389	-11.8977	0.0660928	-0.752671	-5.17038	4.53654	13.7173	-0.00886938	-13.4926	0.021596	-0.530556	-0.425778	0.119426	STD	0.2085	non ETH-3	0.809766	-3	3	0.27921	0.27921	1.03528	-0.0214829	0.267577	0.267577	-18.69	0.0817574	0.0817574	line1	-15	15	-18.8627
2021/07/20 19:19:07	ETH-2	489	STD	2	21183.3	21814.7	-142.361	-144.77	97	-10.3606	0.00161137	-10.09	-18.6377	0.0021152	-7.25356	0.00154467	-5.45654	0.00214312	-11.8668	0.0494301	-0.99435	-7.48332	2.10354	11.0594	-0.0157783	-13.3066	0.0172744	-0.505808	-0.459193	0.107373	STD	0.2085	non ETH-3	0.797626	-1	3	0.291818	0.291818	1.03528	-0.0214829	0.280629	0.280629	-18.69	-0.0523483	line2	-0.0523483	-15	15
2021/07/21 07:15:35	ETH-2	489	STD	21	16655.2	16690.9	-118.557	-118.825	79	-10.3998	0.00302376	-10.3035	-18.8493	0.00715904	-7.29774	0.0030568	-5.67093	0.00725395	-12.0982	0.0824585	-0.797611	19.7726	5.15745	39.3116	0.0419689	-13.6465	0.0229371	-0.592419	-0.491245	0.1192	STD	0.2085	non ETH-3	0.802045	-3	3	0.209626	0.209626	1.03528	-0.0214829	0.195538	0.195538	-18.69	0.159315	0.159315	line1	-15	15	-18.7578
2021/07/21 22:54:00	ETH-2	489	STD	45	23597.1	24761.9	-154.437	-158.849	94	-10.3506	0.0026907	-10.2599	-18.8061	0.00559295	-7.2501	0.00268764	-5.62708	0.00566746	-12.2493	0.0520388	-1.03853	-30.255	2.07375	-11.809	-0.06719	-13.5638	0.0189217	-0.601435	#DIV/0!	0.0989899	STD	0.2085	non ETH-3	0.841531	-3	1	0.240095	0.240095	1.03528	-0.0214829	0.227082	0.227082	-18.69	0.116113	0.116113	line1	-15	15	-18.6997
2021/07/22 15:46:43	ETH-2	490	STD	2	19197.4	19218.3	-131.126	-130.654	79	-10.3836	0.00181316	-10.1185	-18.6659	0.00274334	-7.27614	0.00174775	-5.48517	0.00277942	-11.5405	0.058213	-0.607006	-11.2558	2.79585	7.29745	-0.0248203	-13.4275	0.0183834	-0.576532	-0.514312	0.109315	STD	0.2085	non ETH-3	0.799001	-1	3	0.222469	0.222469	1.03528	-0.0214829	0.208834	0.208834	-18.69	-0.0241264	line2	-0.0241264	-2	15
2021/07/23 03:04:42	ETH-2	490	STD	21	14617.1	14511.8	-106.166	-105.707	75	-10.5245	0.00336591	-10.641	-19.184	0.00870664	-7.42627	0.00342759	-6.01	0.00882152	-12.7037	0.0687093	-0.728609	6.20675	5.22152	26.3147	0.0124311	-14.1703	0.0251549	-0.654661	-0.515395	0.123739	STD	0.2085	non ETH-3	0.852488	-3	3	0.197827	0.197827	1.03528	-0.0214829	0.183323	0.183323	-18.69	0.493954	0.493954	line1	-15	15	-19.0177
2021/07/23 07:54:37	ETH-2	490	STD	29	17062.1	17020.6	-120.003	-119.681	75	-10.4339	0.00315386	-10.3271	-18.8727	0.00685419	-7.33053	0.0031313	-5.69468	0.00694442	-12.075	0.0736659	-0.72635	-7.84959	4.03337	11.2441	-0.0155866	-13.7663	0.0272286	-0.656282	#DIV/0!	0.141126	STD	0.2085	non ETH-3	0.761459	-3	1	0.105176	0.105176	1.03528	-0.0214829	0.0874037	0.0874037	-18.69	0.182701	0.182701	line1	-15	15	-18.73
[truncated: 6 more columns]

## Sheet: Merck
Date	SA/STD	Run	ID	Row	Sa m44 [mV]	Ref m44 [mV]	Sa m54 [mV]	Ref m54 [mV]	Weight [μg]	d13C [‰]	d13C SE [‰]	d18O( gas) [‰]	d18Occ [‰]	d18Occ SE [‰]	d45 [‰]	d45 SE [‰]	d46 [‰]	d46 SE [‰]	d48 [‰]	d48 SE [‰]	Δ48 [‰]	d49 [‰]	d49 SE [‰]	Δ49 [‰]	49 parameter [-]	d47 [‰]	d47 SE [‰]	Δ47 Raw [‰]	Δ47 Raw offset correction [‰]	D47 SD [‰]	Type	Accepted values	Offset correction	Average offset correction [‰]	Range offset correction before	Range offset correction after	Offset corrected all [‰]	Offset corrected STDs [‰]	ETF slope [-]	ETF intercept [-]	Final (70 degree AF) [‰]	Final AFF [‰]	Accepted d18O	Offset d18O	Offset Line 1	Offset Line 2	d18O correction range	d18O correction range	Final 18O Offset Line1 corrected [‰]
2021/06/01 06:17:51	Merck	463	TA	32	19765.9	18850.1	-149.293	-144.012	95	-42.1827	0.00223811	-7.3807	-15.9518	0.00486882	-36.9761	0.00225052	-2.8043	0.00493375	-6.24219	0.07637	-0.645426	-23.3796	3.58156	22.3049	-0.0535099	-41.0818	0.0172147	-0.296261	-0.220932	0.0947908	sample	sample	non ETH-3	0.782357	-3	3	0.486096	sample	1.03528	-0.0214829	0.498472	0.498472	sample	sample	line2	sample	-15	15
2021/06/03 06:24:36	Merck	464	RP	39	16676.5	16060.3	-131.317	-127.425	84	-42.5301	0.00272386	-7.81872	-16.386	0.00380937	-37.3167	0.00265106	-3.24469	0.00386106	-7.26219	0.0723709	-0.788798	-40.2468	3.73036	5.90086	-0.0900949	-41.9096	0.0216996	-0.360455	-0.248348	0.118815	sample	sample	non ETH-3	0.817686	-3	2	0.457232	sample	1.03528	-0.0214829	0.43105	0.43105	sample	sample	sample	line1	-15	15	-15.9543
2021/06/09 07:30:13	Merck	468	NW	26	15639.2	14949.2	-124.233	-120.103	81	-42.3502	0.003262	-7.4644	-16.0347	0.00481128	-37.1359	0.00319766	-2.88867	0.00487699	-6.45935	0.0620204	-0.694705	-16.4118	4.96714	29.9516	-0.0347803	-41.3744	0.0220643	-0.346933	-0.09	0.116103	sample	sample	non ETH-3	0.786738	-3	3	0.439805	sample	1.03528	-0.0214829	0.433837	0.433837	sample	sample	line2	sample	-15	15
2021/06/12 07:10:43	Merck	470	TA	26	12582.7	11853.7	-104.178	-99.533	86	-42.4584	0.00330767	-7.49663	-16.0667	0.00455492	-37.2384	0.00322213	-2.92124	0.00461703	-6.75516	0.0856355	-0.926975	-42.8899	4.27142	2.40389	-0.114895	-41.581	0.0286983	-0.420393	-18.4444	0.16886	sample	sample	non ETH-3	0.859929	-3	1	0.439536	sample	1.03528	-0.0214829	0.368098	0.368098	sample	sample	line2	sample	-15	15
2021/06/14 21:35:33	Merck	471	NW	8	17494.5	16969.2	-134.861	-131.392	85	-42.2823	0.00239294	-7.13459	-15.7078	0.00318563	-37.0608	0.00232547	-2.55748	0.00322907	-5.73983	0.0562696	-0.635001	-15.433	3.74098	30.2199	-0.0353937	-40.9992	0.0182545	-0.362394	-0.184655	0.104844	sample	sample	non ETH-3	0.876009	-3	3	0.513614	sample	1.03528	-0.0214829	0.51025	0.51025	sample	sample	line2	sample	-15	15
2021-06-22 00:56:36	Merck	475	TA	23	19839.7	19146.4	-145.401	-141.2	90	-42.2125	0.00292084	-6.94753	-15.5223	0.00338667	-36.9889	0.002839	-2.36958	0.00343418	-5.47724	0.0459915	-0.747573	-28.8078	4.16459	15.7676	-0.0552692	-40.6804	0.0226682	-0.292258	-0.152197	0.124501	sample	sample	non ETH-3	0.839282	-3	3	0.547024	sample	1.03528	-0.0214829	0.502676	0.502676	sample	sample	sample	line1	-15	15	-15.6596
2021-06-23 14:46:57	Merck	476	RP	39	17199.1	16798	-130.109	-127.803	83	-42.2331	0.00270076	-6.97816	-15.5527	0.00377157	-37.0093	0.00262427	-2.40036	0.00382257	-5.38761	0.0641936	-0.595849	-28.6723	3.14111	15.9943	-0.065201	-40.7251	0.0204512	-0.286588	-0.237542	0.11662	sample	sample	non ETH-3	0.825727	-3	3	0.539139	sample	1.03528	-0.0214829	0.508631	0.508631	sample	sample	sample	line1	-15	15	-15.6606
2021-06-25 07:34:36	Merck	477	TA	36	20222.7	19527.6	-146.563	-142.655	91	-42.2207	0.0025151	-6.92287	-15.4979	0.00394276	-36.9957	0.00246824	-2.34484	0.00399616	-5.28277	0.0576991	-0.601737	-34.12	4.38565	10.1698	-0.0598641	-40.6516	0.0175735	-0.279206	-0.580225	0.0983834	sample	sample	non ETH-3	0.802561	-3	3	0.523356	sample	1.03528	-0.0214829	0.516385	0.516385	sample	sample	line2	sample	-15	15
2021-06-25 22:39:08	Merck	478	NW	14	16633.4	15890	-126.299	-121.892	89	-42.4237	0.00267973	-7.46941	-16.0397	0.00415233	-37.205	0.00263687	-2.89385	0.00420897	-6.62558	0.0623518	-0.851516	-20.3936	4.27992	25.8719	-0.0448777	-41.4369	0.0195572	-0.332816	-0.09	0.106039	sample	sample	non ETH-3	0.838258	-3	3	0.505442	sample	1.03528	-0.0214829	0.501789	0.501789	sample	sample	line2	sample	-15	15
2021-06-29 08:56:18	Merck	479	RP	39	12770.6	12103.1	-101.134	-97.065	86	-42.2241	0.00261106	-6.95764	-15.5324	0.00371301	-37.0001	0.00253966	-2.37975	0.00376319	-5.57209	0.088209	-0.822517	-46.3195	4.6551	-2.51586	-0.0874447	-40.7863	0.0230947	-0.380559	-0.09	0.137829	sample	sample	non ETH-3	0.845026	-3	3	0.464466	sample	1.03528	-0.0214829	0.409934	0.409934	sample	sample	sample	line1	-15	15	-15.6674
2021-07-02 10:08:29	Merck	482	TA	36	19176.3	18984.9	0	0	86	-42.2502	0.00261228	0	-15.6204	0.00351729	-37.0243	0.00255127	-2.42758	0.0035656	-5.6755	0.0562578	-0.830602	-32.7126	5.63941	11.8524	-0.0375987	-40.773	0.0209159	-0.287038	0	0.120163	sample	sample	non ETH-3	0.833871	-3	3	0.546833	sample	1.03528	-0.0214829	0.508158	0.508158	sample	sample	line2	sample	-15	15
2021/07/16 09:58:42	Merck	487	TA	29	23050.3	23231.9	-151.176	-150.907	96	-42.3427	0.00256777	-7.41259	-15.9834	0.00426331	-37.1271	0.00252545	-2.83664	0.00432075	-6.54812	0.0580387	-0.888259	-48.3029	2.83301	-3.55368	-0.0910484	-41.2566	0.0159852	-0.28478	-0.232302	0.0840625	sample	sample	non ETH-3	0.748614	-3	3	0.463833	sample	1.03528	-0.0214829	0.51053	0.51053	sample	sample	sample	line1	-15	15	-16.1557
2021/07/20 12:19:00	Merck	488	RP	39	19495.2	19503.6	-133.255	-132.88	91	-42.221	0.00257732	-6.96105	-15.5357	0.0029251	-36.9973	0.0024756	-2.38317	0.00296473	-5.36827	0.0723702	-0.610855	-41.5952	3.97201	2.42975	-0.0716616	-40.6148	0.0179442	-0.201429	-0.158248	0.0985058	sample	sample	non ETH-3	0.759027	-3	3	0.557598	sample	1.03528	-0.0214829	0.598073	0.598073	sample	sample	sample	line1	-15	9	-15.7921
2021/07/21 20:19:00	Merck	489	NW	41	18399.3	17977.9	-128.21	-125.214	84	-42.2598	0.00362816	-7.15467	-15.7277	0.00767638	-37.0404	0.00364256	-2.57759	0.00777897	-6.09361	0.0564607	-0.950311	-13.1564	4.44635	32.6179	-0.0274656	-40.9114	0.0271484	-0.272922	-0.09	0.124229	sample	sample	non ETH-3	0.845987	-3	3	0.573065	sample	1.03528	-0.0214829	0.571798	0.571798	sample	sample	sample	line1	-15	15	-15.6334
2021/07/23 04:14:04	Merck	490	RP	23	11793.8	11146.8	-88.939	-85.171	89	-42.3052	0.00397299	-7.14176	-15.7149	0.00799579	-37.0825	0.00395998	-2.56473	0.00810251	-5.86593	0.0826402	-0.747224	-16.3897	4.99405	29.2562	-0.0381684	-41.0171	0.02731	-0.350559	-0.237731	0.145944	sample	sample	non ETH-3	0.812831	-3	3	0.462272	sample	1.03528	-0.0214829	0.441444	0.441444	sample	sample	sample	line1	-15	15	-15.5661
2021/06/01 06:17:51	Merck	463	TA	32	19765.9	18850.1	-149.293	-144.012	95	-42.1827	0.00223811	-7.3807	-15.9518	0.00486882	-36.9761	0.00225052	-2.8043	0.00493375	-6.24219	0.07637	-0.645426	-23.3796	3.58156	22.3049	-0.0535099	-41.0818	0.0172147	-0.296261	-0.220932	0.0947908	sample	sample	non ETH-3	0.782357	-3	3	0.486096	sample	1.05028	0.80963	114	200	0.498472	65.2543	sample	sample	line2	sample	-15
2021/06/03 06:24:36	Merck	464	RP	39	16676.5	16060.3	-131.317	-127.425	84	-42.5301	0.00272386	-7.81872	-16.386	0.00380937	-37.3167	0.00265106	-3.24469	0.00386106	-7.26219	0.0723709	-0.788798	-40.2468	3.73036	5.90086	-0.0900949	-41.9096	0.0216996	-0.360455	-0.248348	0.118815	sample	sample	non ETH-3	0.817686	-3	2	0.457232	sample	1.05028	0.80963	156	200	0.43105	103.9	sample	sample	sample	line1	-15
2021/06/05 12:28:03	Merck	466	NW	32	6662.72	6129.5	-60.529	-56.502	85	-42.4042	0.00333546	-7.52295	-16.0928	0.00451379	-37.1885	0.00321235	-2.94754	0.00457383	-7.75042	0.106416	-1.87541	-71.4045	4.25621	-27.4636	-0.230358	-41.6379	0.0300433	-0.507264	-0.404975	0.184093	sample								1.03528	-0.0214829	200	200							-15
2021/06/08 06:04:32	Merck	467	JF	33	13220.6	12604.3	-109.58	-105.447	92	-42.4132	0.00332711	-7.5749	-16.1443	0.00447696	-37.1988	0.0032516	-2.9997	0.00453874	-6.66486	0.0738704	-0.67886	-29.2302	3.94039	16.8229	-0.0698197	-41.5777	0.0240683	-0.382051	-0.316424	0.150904	sample								1.05028	0.80963	200	200							-15
2021/06/09 07:30:13	Merck	468	NW	26	15639.2	14949.2	-124.233	-120.103	81	-42.3502	0.003262	-7.4644	-16.0347	0.00481128	-37.1359	0.00319766	-2.88867	0.00487699	-6.45935	0.0620204	-0.694705	-16.4118	4.96714	29.9516	-0.0347803	-41.3744	0.0220643	-0.346933	-0.09	0.116103	sample	sample	non ETH-3	0.786738	-3	3	0.439805	sample	1.03528	-0.0214829	200	200	0.433837	102.032	sample	sample	line2	sample	-15
2021/06/12 07:10:43	Merck	470	TA	26	12582.7	11853.7	-104.178	-99.533	86	-42.4584	0.00330767	-7.49663	-16.0667	0.00455492	-37.2384	0.00322213	-2.92124	0.00461703	-6.75516	0.0856355	-0.926975	-42.8899	4.27142	2.40389	-0.114895	-41.581	0.0286983	-0.420393	-18.4444	0.16886	sample	sample	non ETH-3	0.859929	-3	1	0.439536	sample	1.05028	0.80963	200	200	0.368098	155.269	sample	sample	line2	sample	-15
2021/06/14 21:35:33	Merck	471	NW	8	17494.5	16969.2	-134.861	-131.392	85	-42.2823	0.00239294	-7.13459	-15.7078	0.00318563	-37.0608	0.00232547	-2.55748	0.00322907	-5.73983	0.0562696	-0.635001	-15.433	3.74098	30.2199	-0.0353937	-40.9992	0.0182545	-0.362394	-0.184655	0.104844	sample	sample	non ETH-3	0.876009	-3	3	0.513614	sample	1.03528	-0.0214829	200	200	0.51025	59.6483	sample	sample	line2	sample	-15
44364.4	Merck	472	RP	39	7915.03	7392.05	-68.914	-65.286	78	-42.4783	0.148029	-7.02964	-15.6037	0.050257	-37.2408	0.140094	-2.45255	0.0511304	6.02901	7.29546	10.9853	226.915	184.165	284.4	0.747259	-37.7912	1.53812	3.08355	3.07817	11.2807	sample								1.05028	0.80963	200	200							-15
44365.9	Merck	474	NdW	15	15029	14537	-118.061	-115.305	85	-42.2051	0.00255925	-6.87471	-15.4501	0.00366826	-36.9794	0.00250108	-2.29647	0.00371829	-4.66625	0.0630405	-0.0792895	92.248	4.50896	142.205	0.198553	-40.5604	0.0207541	-0.249379	-0.282283	0.121174	sample								1.05028	0.80963	200	200							-15
44369	Merck	475	TA	23	19839.7	19146.4	-145.401	-141.2	90	-42.2125	0.00292084	-6.94753	-15.5223	0.00338667	-36.9889	0.002839	-2.36958	0.00343418	-5.47724	0.0459915	-0.747573	-28.8078	4.16459	15.7676	-0.0552692	-40.6804	0.0226682	-0.292258	-0.152197	0.124501	sample	sample	non ETH-3	0.839282	-3	3	0.547024	sample	1.05028	0.80963	200	200	0.502676	63.2207	sample	sample	sample	line1	-15
44370.6	Merck	476	RP	39	17199.1	16798	-130.109	-127.803	83	-42.2331	0.00270076	-6.97816	-15.5527	0.00377157	-37.0093	0.00262427	-2.40036	0.00382257	-5.38761	0.0641936	-0.595849	-28.6723	3.14111	15.9943	-0.065201	-40.7251	0.0204512	-0.286588	-0.237542	0.11662	sample	sample	non ETH-3	0.825727	-3	3	0.539139	sample	1.05028	0.80963	200	200	0.508631	60.4022	sample	sample	sample	line1	-15
44372.3	Merck	477	TA	36	20222.7	19527.6	-146.563	-142.655	91	-42.2207	0.0025151	-6.92287	-15.4979	0.00394276	-36.9957	0.00246824	-2.34484	0.00399616	-5.28277	0.0576991	-0.601737	-34.12	4.38565	10.1698	-0.0598641	-40.6516	0.0175735	-0.279206	-0.580225	0.0983834	sample	sample	non ETH-3	0.802561	-3	3	0.523356	sample	1.05028	0.80963	200	200	0.516385	56.8363	sample	sample	line2	sample	-15
44372.9	Merck	478	NW	14	16633.4	15890	-126.299	-121.892	89	-42.4237	0.00267973	-7.46941	-16.0397	0.00415233	-37.205	0.00263687	-2.89385	0.00420897	-6.62558	0.0623518	-0.851516	-20.3936	4.27992	25.8719	-0.0448777	-41.4369	0.0195572	-0.332816	-0.09	0.106039	sample	sample	non ETH-3	0.838258	-3	3	0.505442	sample	1.03528	-0.0214829	200	200	0.501789	63.6467	sample	sample	line2	sample	-15
44376.4	Merck	479	RP	39	12770.6	12103.1	-101.134	-97.065	86	-42.2241	0.00261106	-6.95764	-15.5324	0.00371301	-37.0001	0.00253966	-2.37975	0.00376319	-5.57209	0.088209	-0.822517	-46.3195	4.6551	-2.51586	-0.0874447	-40.7863	0.0230947	-0.380559	-0.09	0.137829	sample	sample	non ETH-3	0.845026	-3	3	0.464466	sample	1.05028	0.80963	200	200	0.409934	119.018	sample	sample	sample	line1	-15
44377.4	Merck	480	NdW	33	13060.5	12403.1	-103.202	-99.2205	90	-42.2111	0.0023773	-6.92582	-15.5008	0.00376593	-36.9868	0.00232698	-2.34778	0.00381661	-5.53781	0.0836703	-0.852111	-24.2361	4.35325	20.503	-0.0544973	-40.6911	0.0176559	-0.327083	-0.239548	0.104473	sample								1.05028	0.80963	200	200							-15
44378.3	Merck	481	NW	5	10818.2	10474.9	0	0	81	-42.109	0.00239211	0	-15.5892	0.00342977	-36.891	0.00229486	-2.3957	0.00347456	-4.95055	0.0823405	-0.166023	66.736	6.86389	115.648	0.21868	-40.607	0.0286623	-0.288537	0	0.166302	sample	0	0	0	0	0	0	0	1.03528	-0.0214829	200	200	0	0	0	0	0	0	-15
44379.4	Merck	482	TA	36	19176.3	18984.9	0	0	86	-42.2502	0.00261228	0	-15.6204	0.00351729	-37.0243	0.00255127	-2.42758	0.0035656	-5.6755	0.0562578	-0.830602	-32.7126	5.63941	11.8524	-0.0375987	-40.773	0.0209159	-0.287038	0	0.120163	sample	sample	non ETH-3	0.833871	-3	3	0.546833	sample	1.05028	0.80963	200	200	0.508158	60.6235	sample	sample	line2	sample	-15
2021/07/16 09:58:42	Merck	487	TA	29	23050.3	23231.9	-151.176	-150.907	96	-42.3427	0.00256777	-7.41259	-15.9834	0.00426331	-37.1271	0.00252545	-2.83664	0.00432075	-6.54812	0.0580387	-0.888259	-48.3029	2.83301	-3.55368	-0.0910484	-41.2566	0.0159852	-0.28478	-0.232302	0.0840625	sample	sample	non ETH-3	0.748614	-3	3	0.463833	sample	1.05028	0.80963	200	200	0.51053	59.5184	sample	sample	sample	line1	-15
2021/07/20 12:19:00	Merck	488	RP	39	19495.2	19503.6	-133.255	-132.88	91	-42.221	0.00257732	-6.96105	-15.5357	0.0029251	-36.9973	0.0024756	-2.38317	0.00296473	-5.36827	0.0723702	-0.610855	-41.5952	3.97201	2.42975	-0.0716616	-40.6148	0.0179442	-0.201429	-0.158248	0.0985058	sample	sample	non ETH-3	0.759027	-3	3	0.557598	sample	1.05028	0.80963	200	200	0.598073	25.11	sample	sample	sample	line1	-15
2021/07/21 20:19:00	Merck	489	NW	41	18399.3	17977.9	-128.21	-125.214	84	-42.2598	0.00362816	-7.15467	-15.7277	0.00767638	-37.0404	0.00364256	-2.57759	0.00777897	-6.09361	0.0564607	-0.950311	-13.1564	4.44635	32.6179	-0.0274656	-40.9114	0.0271484	-0.272922	-0.09	0.124229	sample	sample	non ETH-3	0.845987	-3	3	0.573065	sample	1.03528	-0.0214829	200	200	0.571798	34.2981	sample	sample	sample	line1	-15
2021/07/23 04:14:04	Merck	490	RP	23	11793.8	11146.8	-88.939	-85.171	89	-42.3052	0.00397299	-7.14176	-15.7149	0.00799579	-37.0825	0.00395998	-2.56473	0.00810251	-5.86593	0.0826402	-0.747224	-16.3897	4.99405	29.2562	-0.0381684	-41.0171	0.02731	-0.350559	-0.237731	0.145944	sample	sample	non ETH-3	0.812831	-3	3	0.462272	sample	1.05028	0.80963	200	200	0.441444	97.0728	sample	sample	sample	line1	-15
[truncated: 14 more columns]

## Sheet: ETH-1
Date	SA/STD	Run	ID	Row	Sa m44 [mV]	Ref m44 [mV]	Sa m54 [mV]	Ref m54 [mV]	Weight [μg]	d13C [‰]	d13C SE [‰]	d18O( gas) [‰]	d18Occ [‰]	d18Occ SE [‰]	d45 [‰]	d45 SE [‰]	d46 [‰]	d46 SE [‰]	d48 [‰]	d48 SE [‰]	Δ48 [‰]	d49 [‰]	d49 SE [‰]	Δ49 [‰]	49 parameter [-]	d47 [‰]	d47 SE [‰]	Δ47 Raw [‰]	Δ47 Raw offset correction [‰]	D47 SD [‰]	Type	Accepted values	Offset correction	Average offset correction [‰]	Range offset correction before	Range offset correction after	Offset corrected all [‰]	Offset corrected STDs [‰]	ETF slope [-]	ETF intercept [-]	Final (70 degree AF) [‰]	Final AFF [‰]	Accepted d18O	Offset d18O	Offset Line 1	Offset Line 2	d18O correction range	d18O correction range	Final 18O Offset Line1 corrected [‰]
2021/05/27 12:30:52	ETH-1	461	STD	3	21944.9	22181.8	-160.972	-161.669	95	1.60824	0.00226202	6.00243	-2.68419	0.00368953	4.52038	0.00219976	10.7211	0.00373841	20.3777	0.0486743	-1.15458	-3.33201	2.9623	-28.6813	-0.00554973	14.7256	0.0200524	-0.519218	-0.479307	0.111939	STD	0.2052	non ETH-3	0.812716	-2	3	0.293498	0.293498	1.03528	-0.0214829	0.282369	0.282369	-2.19	0.494187	0.494187	line1	-15	15	-2.32875
2021/05/27 17:56:06	ETH-1	461	STD	12	20875.9	20881.9	-153.348	-152.01	90	1.56932	0.00273446	5.88764	-2.79798	0.00381293	4.47993	0.00266406	10.6058	0.00386481	20.2809	0.0506069	-1.02144	14.6855	2.87043	-10.8579	0.0330052	14.5654	0.0180679	-0.523379	-0.48732	0.0992619	STD	0.2052	non ETH-3	0.741226	-3	3	0.217847	0.217847	1.03528	-0.0214829	0.204049	0.204049	-2.19	0.607985	line2	0.607985	-15	15
2021/05/28 17:35:43	ETH-1	462	STD	3	16927.7	16867.6	-130.659	-130.392	79	1.62594	0.00190899	6.11122	-2.57634	0.00295383	4.54075	0.0018582	10.8304	0.00299331	20.7484	0.0854115	-1.0076	4.7163	3.21906	-21.0666	0.0107467	14.7499	0.0166258	-0.622375	-0.496266	0.0949323	STD	0.2052	non ETH-3	0.805897	-2	3	0.183522	0.183522	1.03528	-0.0214829	0.168513	0.168513	-2.19	0.386341	0.386341	line1	-15	15	-2.3452
2021/05/28 22:47:52	ETH-1	462	STD	12	20972.5	21200.1	-152.996	-153.785	91	1.64109	0.00197921	6.10875	-2.57879	0.00321888	4.55486	0.00193033	10.8279	0.00326176	20.7081	0.0533169	-1.04225	3.18232	2.46099	-22.5711	0.00820939	14.7939	0.0171794	-0.591187	-0.423694	0.098016	STD	0.2052	non ETH-3	0.868101	-3	3	0.276915	0.276915	1.03528	-0.0214829	0.2652	0.2652	-2.19	0.388793	line2	0.388793	-15	15
2021/05/31 13:29:03	ETH-1	463	STD	3	16888.3	16773.1	-134.016	-133.498	85	1.60482	0.0020132	6.01199	-2.67471	0.00281393	4.51752	0.00193234	10.7307	0.00285091	20.7536	0.0716327	-0.805596	21.8755	2.45294	-4.1302	0.0627325	14.6538	0.0183836	-0.596327	-0.533938	0.104413	STD	0.2052	non ETH-3	0.815362	-2	3	0.219035	0.219035	1.03528	-0.0214829	0.205279	0.205279	-2.19	0.484712	0.484712	line1	-15	15	-2.21814
2021/05/31 18:41:07	ETH-1	463	STD	12	20756.1	20930	-155.306	-155.734	88	1.60096	0.0023659	6.04358	-2.6434	0.00291193	4.51499	0.00229097	10.7624	0.00295182	20.4518	0.0578044	-1.16366	14.0592	2.71577	-11.8059	0.0359374	14.7554	0.0183438	-0.524442	-0.473552	0.100079	STD	0.2052	non ETH-3	0.770239	-3	3	0.245796	0.245796	1.03528	-0.0214829	0.232984	0.232984	-2.19	0.453399	line2	0.453399	-15	15
2021/06/01 13:18:14	ETH-1	463	STD	44	23104.6	23260.9	-167.215	-166.4	97	1.63445	0.00225601	6.08561	-2.60173	0.00298433	4.54783	0.00219127	10.8047	0.00302502	20.4886	0.0453272	-1.21113	-1.29315	2.12622	-26.8805	-0.00202977	14.8217	0.020895	-0.533922	#DIV/0!	0.111878	STD	0.2052	non ETH-3	0.709409	-3	0	0.175488	0.175488	1.03528	-0.0214829	0.160195	0.160195	-2.19	0.411727	line2	0.411727	-15	15
2021/06/02 11:54:40	ETH-1	464	STD	3	19005.7	19178.1	-149.112	-149.811	79	1.56372	0.00163431	6.00567	-2.68098	0.00208106	4.47878	0.00155837	10.7243	0.00210822	20.7323	0.0624288	-0.813672	5.33964	2.50792	-20.1923	0.010275	14.6866	0.0162534	-0.517988	-0.468616	0.0949994	STD	0.2052	non ETH-3	0.77902	-2	3	0.261032	0.261032	1.03528	-0.0214829	0.248758	0.248758	-2.19	0.49098	0.49098	line1	-15	15	-2.25137
2021/06/02 17:08:49	ETH-1	464	STD	12	17354.3	17301.2	-136.729	-136.196	91	1.60851	0.00193936	6.06669	-2.62049	0.00236664	4.52287	0.00186817	10.7856	0.00239861	20.7332	0.073069	-0.934062	21.5278	3.3332	-4.58095	0.0440272	14.7169	0.0201914	-0.593028	-0.467713	0.110802	STD	0.2052	non ETH-3	0.83071	-3	3	0.237682	0.237682	1.03528	-0.0214829	0.224583	0.224583	-2.19	0.430489	line2	0.430489	-15	15
2021/06/03 14:28:57	ETH-1	465	STD	3	22871.2	23105.5	-166.712	-166.982	94	1.59105	0.00235597	6.03036	-2.65651	0.00243005	4.50524	0.00227545	10.7491	0.00246429	20.5123	0.0533203	-1.07816	12.6529	2.52459	-13.1406	0.0359698	14.6752	0.0191091	-0.580567	-0.491882	0.108335	STD	0.2052	non ETH-3	0.825083	-2	3	0.244516	0.244516	1.03528	-0.0214829	0.231659	0.231659	-2.19	0.466506	0.466506	line1	-15	15	-2.22708
2021/06/04 14:07:01	ETH-1	465	STD	40	18912.1	18917.5	-144.454	-144.187	96	1.62214	0.00216536	6.104	-2.5835	0.0031082	4.53694	0.00210049	10.8231	0.00314989	20.7887	0.0623286	-0.953819	18.6477	2.61381	-7.47463	0.053173	14.7881	0.0190545	-0.573747	-0.287653	0.103557	STD	0.2052	non ETH-3	0.774983	-3	1	0.201236	0.201236	1.03528	-0.0214829	0.186851	0.186851	-2.19	0.393502	line2	0.393502	-15	1
2021/06/05 19:21:20	ETH-1	466	STD	44	19104.4	19314.3	-145.47	-146.252	91	1.65623	0.00171636	6.19469	-2.49359	0.00224109	4.57203	0.00164115	10.9142	0.00227049	20.8527	0.0440587	-1.07126	8.35465	2.66098	-17.7141	0.0189715	14.8683	0.0159403	-0.619392	-0.526872	0.0923112	STD	0.2052	non ETH-3	0.799003	-3	2	0.179611	0.179611	1.03528	-0.0214829	0.164464	0.164464	-2.19	0.303594	line2	0.303594	-15	15
2021/06/07 12:55:33	ETH-1	467	STD	3	14353.3	14295.3	-118.273	-118.293	77	1.56682	0.00124194	5.98196	-2.70448	0.00248259	4.48086	0.00119493	10.7005	0.0025144	20.5958	0.0562763	-0.900272	26.0559	3.22513	0.0416119	0.0573285	14.5734	0.0166392	-0.608524	-0.543455	0.0997433	STD	0.2052	non ETH-3	0.771832	-2	3	0.163307	0.163307	1.03528	-0.0214829	0.147585	0.147585	-2.19	0.514482	0.514482	line1	-3	15	-2.31964
2021/06/08 13:55:42	ETH-1	467	STD	44	23643.8	23997.9	-170.129	-170.386	97	1.54136	0.00218131	5.9663	-2.72001	0.00286445	4.45646	0.00212326	10.6847	0.00290377	20.2227	0.0485666	-1.23439	0.174545	2.18648	-25.1286	0.00192428	14.6001	0.0197341	-0.541838	-0.444037	0.106299	STD	0.2052	non ETH-3	0.785151	-3	2	0.243312	0.243312	1.03528	-0.0214829	0.230413	0.230413	-2.19	0.530007	line2	0.530007	-15	3
2021/06/08 23:35:04	ETH-1	468	STD	12	18072.1	18285	-139.754	-140.55	89	1.41931	0.00195269	5.95548	-2.73074	0.00229922	4.34173	0.00187464	10.6736	0.00233013	20.3898	0.0580045	-1.04873	28.8486	3.48756	2.96388	0.0624761	14.4515	0.0216174	-0.559674	-0.442298	0.125932	STD	0.2052	non ETH-3	0.827932	-3	3	0.268258	0.268258	1.03528	-0.0214829	0.256239	0.256239	-2.19	0.540736	line2	0.540736	-15	15
2021/06/09 17:45:28	ETH-1	468	STD	44	23978.3	24538.2	-170.955	-172.624	89	1.53816	0.00201034	6.01838	-2.66838	0.00301259	4.45527	0.00197091	10.737	0.00305363	20.4354	0.0576018	-1.12943	-6.4939	1.96447	-31.7255	-0.0139847	14.6146	0.0163202	-0.577127	-0.09	0.0883563	STD	0.2052	non ETH-3	0.862166	-3	2	0.285038	0.285038	1.03528	-0.0214829	0.27361	0.27361	-2.19	0.478378	line2	0.478378	-15	15
2021/06/10 12:54:44	ETH-1	469	STD	3	15004.9	15023.6	-120.514	-121.327	80	1.52761	0.00172814	5.85268	-2.83265	0.00234765	4.43963	0.00161911	10.5706	0.00237683	20.3209	0.0638127	-0.912648	21.6801	3.19456	-3.92814	0.048358	14.4576	0.0193006	-0.554049	-0.555053	0.118668	STD	0.2052	non ETH-3	0.702374	-2	3	0.148325	0.148325	1.03528	-0.0214829	0.132075	0.132075	-2.19	0.642646	0.642646	line1	-2	15	-2.42692
2021/06/10 18:05:53	ETH-1	469	STD	12	15552	15545.9	-123.468	-123.784	78	1.61081	0.001643	6.05252	-2.63453	0.00241473	4.52453	0.001581	10.7714	0.00244648	20.6681	0.0678544	-0.969661	23.8322	3.51246	-2.30958	0.0515333	14.701	0.0156562	-0.59657	-0.471467	0.0932507	STD	0.2052	non ETH-3	0.818039	-3	3	0.221469	0.221469	1.03528	-0.0214829	0.207799	0.207799	-2.19	0.444529	line2	0.444529	-12	15
2021/06/14 18:47:40	ETH-1	471	STD	3	17245.4	17457.6	-133.266	-134.657	84	1.70018	0.00145925	6.37136	-2.31844	0.00218307	4.61935	0.00138255	11.0916	0.00221082	21.2593	0.0643419	-1.02407	22.0718	2.24472	-4.74445	0.0531923	15.1028	0.0167335	-0.609463	-0.46479	0.10406	STD	0.2052	non ETH-3	0.895016	-2	3	0.285553	0.285553	1.03528	-0.0214829	0.274143	0.274143	-2.19	0.128444	0.128444	line1	-15	15	-2.27616
2021/06/14 23:54:44	ETH-1	471	STD	12	16278.3	16438.6	-127.252	-127.873	83	1.68843	0.00173054	6.37454	-2.31529	0.00247553	4.60845	0.0016334	11.0948	0.00250681	21.1916	0.0571681	-1.09661	29.5856	3.55823	2.57731	0.0676155	15.0708	0.0212813	-0.632916	-0.500095	0.12759	STD	0.2052	non ETH-3	0.842319	-3	3	0.209404	0.209404	1.03528	-0.0214829	0.195308	0.195308	-2.19	0.125293	line2	0.125293	-15	15
2021/06/15 18:59:47	ETH-1	471	STD	44	14743.6	14751.5	-117.628	-117.292	85	1.72252	0.00203339	6.44578	-2.24467	0.00197788	4.64287	0.00193152	11.1664	0.00200411	21.5422	0.0641666	-0.89507	44.0167	3.29317	16.4514	0.0998844	15.2515	0.0204355	-0.559823	-0.09	0.122695	STD	0.2052	non ETH-3	0.831255	-3	2	0.271432	0.271432	1.03528	-0.0214829	0.259524	0.259524	-2.19	0.0546715	line2	0.0546715	-15	15
2021-06-16 12:54:14	ETH-1	472	STD	3	16922.7	16966.5	-129.362	-130.136	79	1.81237	0.00170904	6.47068	-2.21999	0.00207792	4.72792	0.00162775	11.1915	0.00210507	21.4892	0.0621933	-0.996708	22.9567	3.10439	-4.19119	0.0528214	15.3772	0.0189374	-0.547897	-0.525435	0.111721	STD	0.2052	non ETH-3	0.70561	-2	3	0.157713	0.157713	1.03528	-0.0214829	0.141794	0.141794	-2.19	0.0299883	0.0299883	line1	-15	15	-2.24554
2021-06-16 18:07:39	ETH-1	472	STD	12	19809.7	19802.9	-146.233	-146.133	91	1.83967	0.00182216	6.6082	-2.08365	0.00249017	4.75829	0.0017805	11.3296	0.00252442	21.6084	0.0604522	-1.15296	18.9797	2.56979	-8.36091	0.0454646	15.4977	0.0229319	-0.594636	-0.478877	0.131786	STD	0.2052	non ETH-3	0.799263	-3	3	0.204627	0.204627	1.03528	-0.0214829	0.190363	0.190363	-2.19	-0.106346	line2	-0.106346	-15	15
2021-06-17 19:07:33	ETH-1	473	STD	3	21136.6	21565.5	-153.788	-155.502	93	1.82499	0.00199879	6.56644	-2.12505	0.0024356	4.74308	0.00191555	11.2877	0.00246801	21.7137	0.0627425	-0.967057	39.6959	2.34563	11.8983	0.0964271	15.5003	0.0187083	-0.535733	-0.499811	0.107116	STD	0.2052	non ETH-3	0.747556	-10	3	0.211823	0.211823	1.03528	-0.0214829	0.197812	0.197812	-2.19	-0.0649473	-0.0649473	line1	-15	15	-2.2426
2021-06-18 09:47:51	ETH-1	473	STD	28	20299.8	20692.5	-149.231	-150.659	97	1.83079	0.00172375	6.60104	-2.09075	0.00190597	4.74971	0.00165993	11.3224	0.00193214	21.4788	0.0491393	-1.2654	18.8058	2.27916	-8.50709	0.045723	15.5285	0.0162735	-0.548557	-0.09	0.0959393	STD	0.2052	non ETH-3	0.788541	-3	2	0.239984	0.239984	1.03528	-0.0214829	0.226967	0.226967	-2.19	-0.0992528	line2	-0.0992528	-15	15
2021-06-21 18:33:26	ETH-1	475	STD	12	17140.3	17239.3	-129.544	-130.335	84	1.8481	0.00136547	6.66999	-2.0224	0.00217628	4.76834	0.00130585	11.3917	0.00220434	22.0739	0.0535445	-0.820414	25.8887	2.99406	-1.76808	0.0511006	15.5648	0.0163792	-0.599158	-0.528079	0.105057	STD	0.2052	non ETH-3	0.779073	-3	3	0.179915	0.179915	1.03528	-0.0214829	0.164779	0.164779	-2.19	-0.167602	line2	-0.167602	-15	15
2021-06-22 12:47:39	ETH-1	475	STD	44	19635.4	20039.6	-145.272	-145.93	86	1.84556	0.00173239	6.62143	-2.07053	0.00183191	4.76427	0.00163799	11.3429	0.00185553	21.6905	0.0529318	-1.09889	7.20772	2.60005	-19.8483	0.0153678	15.6129	0.0139915	-0.500317	-500.074	0.0801251	STD	0.2052	non ETH-3	0.727098	-3	2	0.226781	0.226781	1.03528	-0.0214829	0.213298	0.213298	-2.19	-0.119469	line2	-0.119469	-15	15
2021-06-22 23:05:41	ETH-1	476	STD	12	20636.5	21045	-149.858	-151.381	90	1.83888	0.00189353	6.54473	-2.14657	0.00257336	4.75534	0.00180714	11.2659	0.00260682	21.473	0.0542776	-1.15951	4.84289	2.26621	-21.9941	0.0118119	15.4202	0.0234248	-0.605941	-0.458441	0.137409	STD	0.2052	non ETH-3	0.851458	-3	3	0.245517	0.245517	1.03528	-0.0214829	0.232695	0.232695	-2.19	-0.0434288	line2	-0.0434288	-15	15
2021-06-23 17:42:48	ETH-1	476	STD	44	15332.5	15593.6	-118.848	-120.529	75	1.83176	0.00130104	6.63283	-2.05924	0.00204004	4.75173	0.00123954	11.3543	0.00206619	21.9291	0.0771156	-0.888138	33.6486	2.91581	5.87353	0.0777995	15.4918	0.0168635	-0.61768	-0.09	0.108718	STD	0.2052	non ETH-3	0.798876	-3	2	0.181196	0.181196	1.03528	-0.0214829	0.166105	0.166105	-2.19	-0.130764	line2	-0.130764	-15	15
2021-06-24 17:53:51	ETH-1	477	STD	12	17389.2	17338	-130.174	-129.911	78	1.80097	0.00186803	6.57368	-2.11788	0.00213506	4.72082	0.00179375	11.2949	0.00216392	21.9077	0.0636583	-0.791682	27.7112	3.46567	0.243489	0.0520261	15.3737	0.0173733	-0.644455	-0.52243	0.100545	STD	0.2052	non ETH-3	0.819538	-3	3	0.175083	0.175083	1.03528	-0.0214829	0.159777	0.159777	-2.19	-0.072122	line2	-0.072122	-15	15
2021-06-25 11:56:08	ETH-1	477	STD	44	19848.7	20241.5	-144.92	-146.109	86	1.82004	0.00201732	6.59587	-2.09588	0.00247894	4.73946	0.00194481	11.3172	0.00251247	21.75	0.0677491	-0.989928	13.755	2.22828	-13.4018	0.0259608	15.5152	0.0196159	-0.546039	-0.212228	0.114209	STD	0.2052	non ETH-3	0.787936	-3	2	0.241897	0.241897	1.03528	-0.0214829	0.228947	0.228947	-2.19	-0.0941249	line2	-0.0941249	-15	15
2021-06-25 16:33:22	ETH-1	478	STD	3	17288.7	17251	-130.78	-129.94	94	1.84186	0.00209999	6.66856	-2.02381	0.00296812	4.76244	0.00203487	11.3902	0.00300793	22.0958	0.0571384	-0.796113	27.7386	2.61013	0.0409096	0.0611528	15.5728	0.0184232	-0.583888	-1.09074	0.0976717	STD	0.2052	non ETH-3	0.699103	-2	3	0.115216	0.115216	1.03528	-0.0214829	0.0977973	0.0977973	-2.19	-0.166186	-0.166186	line1	-15	15	-2.15798
2021-06-26 16:00:44	ETH-1	478	STD	44	22750.9	23304.2	-159.67	-161.275	98	1.8285	0.00187639	6.58375	-2.10789	0.00252664	4.74697	0.00180408	11.3051	0.00256013	21.4013	0.0472707	-1.30689	-0.696035	2.11742	-27.4504	-0.000679027	15.4926	0.0165582	-0.564117	-0.142582	0.0921862	STD	0.2052	non ETH-3	0.785739	-3	2	0.221621	0.221621	1.03528	-0.0214829	0.207956	0.207956	-2.19	-0.0821086	line2	-0.0821086	-15	15
2021-06-28 12:14:39	ETH-1	479	STD	3	18589.8	18949.7	-133.55	-135.675	84	1.85074	0.0011676	6.6328	-2.05926	0.00158574	4.76951	0.00109497	11.3544	0.00160549	22.0334	0.0580166	-0.786248	25.9495	1.99709	-1.63752	0.0481373	15.6198	0.0193501	-0.510037	-0.44567	0.121767	STD	0.2052	non ETH-3	0.747145	-2	3	0.237108	0.237108	1.03528	-0.0214829	0.223989	0.223989	-2.19	-0.130738	-0.130738	line1	-15	15	-2.16594
2021-06-28 17:30:14	ETH-1	479	STD	12	19020.9	19290.5	-137.291	-138.429	85	1.85318	0.00137826	6.63044	-2.0616	0.00202798	4.77171	0.00132421	11.352	0.00205456	21.9229	0.0486377	-0.889593	22.0171	2.80155	-5.4621	0.0406486	15.5393	0.0185269	-0.589169	-0.471304	0.114257	STD	0.2052	non ETH-3	0.846616	-3	3	0.257447	0.257447	1.03528	-0.0214829	0.245046	0.245046	-2.19	-0.128398	line2	-0.128398	-15	15
2021-06-29 11:41:00	ETH-1	479	STD	44	17214.2	17369.4	-128.526	-129.447	80	1.83829	0.00250003	6.59685	-2.0949	0.00320894	4.7566	0.00240869	11.3182	0.00325199	21.9618	0.0588335	-0.784913	41.6487	5.65603	13.7232	0.0739363	15.544	0.0232717	-0.536249	-1273.98	0.129272	STD	0.2052	non ETH-3	0.77396	-3	2	0.237711	0.237711	1.03528	-0.0214829	0.224614	0.224614	-2.19	-0.0950974	line2	-0.0950974	-15	15
2021-06-29 16:11:23	ETH-1	480	STD	3	16787.6	17116.6	-126.295	-127.662	82	1.83251	0.00144407	6.58091	-2.11071	0.00178128	4.75063	0.00137141	11.3022	0.00180432	21.7088	0.0547023	-1.00059	15.8623	3.06709	-11.3337	0.0350783	15.4345	0.0169194	-0.622319	-0.540634	0.102412	STD	0.2052	non ETH-3	0.819027	-2	3	0.196708	0.196708	1.03528	-0.0214829	0.182165	0.182165	-2.19	-0.0792927	-0.0792927	line1	-15	15	-2.24806
2021-06-29 21:29:01	ETH-1	480	STD	12	25023.1	25839.5	-168.964	-172.54	102	1.80517	0.00220696	6.50182	-2.18912	0.00389681	4.72226	0.00216957	11.2228	0.0039488	21.2346	0.0426979	-1.3074	0.366446	1.79719	-26.2354	0.0020511	15.3239	0.0168899	-0.624842	-0.447591	0.0946483	STD	0.2052	non ETH-3	0.88021	-3	3	0.255368	0.255368	1.03528	-0.0214829	0.242894	0.242894	-2.19	-0.000884091	line2	-0.000884091	-15	15
2021-07-01 07:32:04	ETH-1	481	STD	12	21584.3	22318.2	0	0	94	1.81867	0.00187256	0	-2.1292	0.00176408	4.73805	0.00178818	11.3246	0.00178822	21.8696	0.0569384	-0.887646	63.1756	3.02384	34.6821	0.0696142	15.4901	0.0142123	-0.576243	0	0.0898997	STD	0.2052	non ETH-3	0.738409	-3	3	0.162165	0.162165	1.03528	-0.0214829	0.146403	0.146403	-2.19	-0.0607951	line2	-0.0607951	-15	15
2021-07-01 07:32:04	ETH-1	481	STD	29	15590.3	16051.2	0	0	76	1.77578	0.00135273	0	-2.17518	0.00174971	4.69626	0.00126445	11.278	0.00177135	21.7182	0.0487583	-0.943515	51.3283	4.74392	23.2905	0.0502417	15.3954	0.0201216	-0.581292	0	0.123445	STD	0.2052	non ETH-3	0.80562	-3	2	0.224328	0.224328	1.03528	-0.0214829	0.210759	0.210759	-2.19	-0.0148152	-0.0148152	line1	-15	15	-2.2172
2021-07-02 10:08:29	ETH-1	482	STD	3	17347.1	17700.9	0	0	87	1.84244	0.00174573	0	-2.14273	0.00238082	4.75984	0.00168128	11.311	0.0024125	21.6465	0.0642808	-1.07887	25.6424	3.96088	-1.84203	0.0280886	15.4755	0.0196391	-0.599795	0	0.111161	STD	0.2052	non ETH-3	0.805346	-2	3	0.205551	0.205551	1.03528	-0.0214829	0.191319	0.191319	-2.19	-0.0472724	-0.0472724	line1	-15	15	-2.18475
2021-07-02 10:08:29	ETH-1	482	STD	12	17957.1	18462.4	0	0	82	1.80727	0.00130284	0	-2.23463	0.0024218	4.72368	0.00125819	11.2179	0.00245317	21.419	0.0596007	-1.11737	26.0024	4.06911	-1.27264	0.0179375	15.3267	0.0199872	-0.618653	0	0.117915	STD	0.2052	non ETH-3	0.824454	-3	3	0.205801	0.205801	1.03528	-0.0214829	0.191578	0.191578	-2.19	0.0446339	line2	0.0446339	-15	15
2021/07/08 11:58:15	ETH-1	485	STD	3	22629.1	23331.6	-154.883	-157.171	95	1.73907	0.00161687	6.41871	-2.27151	0.0022183	4.65744	0.00155868	11.1392	0.00224782	21.3137	0.0502484	-1.06492	12.1196	1.23229	-14.5666	0.0371555	15.2413	0.0137195	-0.558458	-1.05904	0.0826793	STD	0.2052	non ETH-3	0.771668	-2	3	0.213209	0.213209	1.03528	-0.0214829	0.199247	0.199247	-2.19	0.0815082	0.0815082	line1	-15	15	-2.30437
2021/07/09 14:36:27	ETH-1	485	STD	44	20829.8	21627.5	-145.393	-148.755	93	1.77181	0.00158709	6.46402	-2.22659	0.00240258	4.68969	0.00151716	11.1848	0.00243366	21.3504	0.0429591	-1.119	13.7793	2.24774	-13.0719	0.034087	15.315	0.0195208	-0.563248	-0.228714	0.115906	STD	0.2052	non ETH-3	0.764054	-3	2	0.200806	0.200806	1.03528	-0.0214829	0.186407	0.186407	-2.19	0.0365911	line2	0.0365911	-15	15
2021/07/15 17:11:21	ETH-1	487	STD	3	16225.1	16471.3	-112.837	-114.287	78	1.87408	0.00135884	6.6645	-2.02783	0.00243301	4.79248	0.00126353	11.3862	0.00246294	21.8088	0.0642856	-1.06875	30.1027	2.91987	2.31774	0.0584534	15.6311	0.021142	-0.553361	-0.514445	0.134196	STD	0.2052	non ETH-3	0.728988	-2	3	0.175626	0.175626	1.03528	-0.0214829	0.160339	0.160339	-2.19	-0.162165	-0.162165	line1	-15	15	-2.10144
2021/07/15 22:59:40	ETH-1	487	STD	12	18081	18518.7	-124.401	-125.922	81	1.87754	0.00132039	6.65903	-2.03326	0.0019088	4.79553	0.00125529	11.3807	0.00193329	21.8276	0.0558393	-1.03955	34.8168	2.9093	6.91183	0.0677698	15.6525	0.0196996	-0.530173	-0.439352	0.117043	STD	0.2052	non ETH-3	0.796118	-3	3	0.265945	0.265945	1.03528	-0.0214829	0.253843	0.253843	-2.19	-0.156737	line2	-0.156737	-15	15
2021/07/19 13:14:01	ETH-1	488	STD	3	17626.9	17953.8	-119.965	-121.236	78	1.87518	0.00191096	6.67325	-2.01917	0.00198109	4.79382	0.00180595	11.395	0.00200662	21.7791	0.0771115	-1.11514	30.0585	2.87308	2.2559	0.0575233	15.6612	0.019542	-0.533729	-0.46987	0.121372	STD	0.2052	non ETH-3	0.75092	-2	3	0.217191	0.217191	1.03528	-0.0214829	0.20337	0.20337	-2.19	-0.170835	-0.170835	line1	-15	15	-2.21733
2021/07/19 19:03:42	ETH-1	488	STD	12	17817.7	18342.2	-122.561	-124.639	83	1.83396	0.00217062	6.50504	-2.18592	0.00438838	4.74935	0.00214144	11.2261	0.00444623	21.4439	0.0598835	-1.10918	28.9812	3.753	1.58293	0.0539554	15.4365	0.0184426	-0.545092	-0.420526	0.103771	STD	0.2052	non ETH-3	0.820783	-3	3	0.275691	0.275691	1.03528	-0.0214829	0.263933	0.263933	-2.19	-0.00407619	line2	-0.00407619	-15	15
2021/07/21 01:22:27	ETH-1	489	STD	12	21238.7	22074.8	-142.315	-145.81	93	1.8364	0.00171194	6.62468	-2.06731	0.00192648	4.75579	0.00160199	11.3462	0.00195033	21.6676	0.0747448	-1.12766	26.0595	2.69129	-1.50031	0.0589324	15.5526	0.0180017	-0.554119	-0.487963	0.10686	STD	0.2052	non ETH-3	0.772861	-3	3	0.218742	0.218742	1.03528	-0.0214829	0.204975	0.204975	-2.19	-0.122687	line2	-0.122687	-15	15
2021/07/21 22:13:19	ETH-1	489	STD	44	16679.7	17318.3	-119.161	-122.142	82	1.85617	0.00137207	6.64302	-2.04914	0.00203339	4.77495	0.0012818	11.3646	0.00205852	21.7797	0.0647958	-1.05457	29.1618	3.45111	1.46282	0.062197	15.508	0.0211073	-0.635597	-0.09	0.130074	STD	0.2052	non ETH-3	0.841531	-3	2	0.205934	0.205934	1.03528	-0.0214829	0.191716	0.191716	-2.19	-0.140863	line2	-0.140863	-15	15
2021/07/22 16:22:25	ETH-1	490	STD	3	20085.2	20417.3	-135.631	-136.822	87	1.72814	0.00223758	6.23801	-2.45065	0.00493864	4.64092	0.00224044	10.9578	0.00500409	21.0584	0.0624364	-0.956183	15.797	2.18413	-10.6206	0.0364201	15.0456	0.017372	-0.557914	-0.478903	0.0876096	STD	0.2052	non ETH-3	0.799001	-2	3	0.241087	0.241087	1.03528	-0.0214829	0.228109	0.228109	-2.19	0.260646	0.260646	line1	-3	15	-2.27255
2021/07/22 21:44:36	ETH-1	490	STD	12	16314.1	16447.7	-116.044	-116.342	92	1.85089	0.00175368	6.66887	-2.0235	0.00238567	4.77091	0.00168249	11.3906	0.00241709	22.2726	0.0626243	-0.623938	23.6946	3.47742	-3.90363	0.0502075	15.5288	0.0156698	-0.63616	-0.497346	0.0988965	STD	0.2052	non ETH-3	0.850542	-3	3	0.214381	0.214381	1.03528	-0.0214829	0.200461	0.200461	-2.19	-0.1665	line2	-0.1665	-12	15
2021/07/23 07:16:07	ETH-1	490	STD	28	19845.1	20106.2	-134.883	-135.962	86	1.83699	0.00166261	6.63856	-2.05356	0.00234404	4.75683	0.00159123	11.3601	0.00237462	21.8317	0.0601761	-0.994816	19.5454	3.00736	-7.86753	0.0416134	15.5753	0.016163	-0.546388	-0.09	0.095435	STD	0.2052	non ETH-3	0.775386	-3	2	0.228998	0.228998	1.03528	-0.0214829	0.215594	0.215594	-2.19	-0.136445	line2	-0.136445	-15	15
[truncated: 6 more columns]

## Sheet: IAEA-C2
Date	SA/STD	Run	ID	Row	Sa m44 [mV]	Ref m44 [mV]	Sa m54 [mV]	Ref m54 [mV]	Weight [μg]	d13C [‰]	d13C SE [‰]	d18O( gas) [‰]	d18Occ [‰]	d18Occ SE [‰]	d45 [‰]	d45 SE [‰]	d46 [‰]	d46 SE [‰]	d48 [‰]	d48 SE [‰]	Δ48 [‰]	d49 [‰]	d49 SE [‰]	Δ49 [‰]	49 parameter [-]	d47 [‰]	d47 SE [‰]	Δ47 Raw [‰]	Δ47 Raw offset correction [‰]	D47 SD [‰]	Type	Accepted values	Offset correction	Average offset correction [‰]	Range offset correction before	Range offset correction after	Offset corrected all [‰]	Offset corrected STDs [‰]	ETF slope [-]	ETF intercept [-]	Final (70 degree AF) [‰]	Final AFF [‰]	Accepted d18O	Offset d18O	Offset Line 1	Offset Line 2	d18O correction range	d18O correction range	Final 18O Offset Line1 corrected [‰]
2021/05/29 02:18:17	IAEA-C2	462	RP	18	22930.1	22880.3	-163.941	-162.746	96	-8.56344	0.0023467	-0.68201	-9.31091	0.00295963	-5.24263	0.00226998	3.9903	0.00299988	7.06444	0.0615956	-0.924736	-11.7423	2.26056	-13.937	-0.0248689	-1.62604	0.0169918	-0.11932	-0.00550461	0.0949046	sample	sample	non ETH-3	0.815836	-3	1	0.696516	sample	1.03528	-0.0214829	0.68431	0.68431	sample	sample	line2	sample	-15	15
2021/06/01 03:24:09	IAEA-C2	463	TA	27	18468.2	18238.8	-142.259	-140.584	80	-8.52658	0.00191811	-0.667687	-9.29671	0.00347719	-5.2076	0.00188028	4.00475	0.00352324	7.30702	0.0678468	-0.712855	10.0087	3.002	7.69904	0.0237707	-1.6283	0.0205387	-0.17206	-0.0743158	0.120343	sample	sample	non ETH-3	0.814762	-3	3	0.642702	sample	1.03528	-0.0214829	0.628918	0.628918	sample	sample	sample	line1	-15	15	-8.86832
2021/06/02 20:41:54	IAEA-C2	464	RP	18	16124.2	15840.5	-128.881	-126.849	96	-8.62749	0.0026413	-0.962359	-9.58884	0.00480422	-5.31239	0.00259141	3.70877	0.00486789	6.5944	0.0551676	-0.830766	1.00654	3.91701	-0.592126	0.0022118	-2.06858	0.0224603	-0.214594	-0.0689939	0.121801	sample	sample	non ETH-3	0.839701	-3	3	0.625107	sample	1.03528	-0.0214829	0.584245	0.584245	sample	sample	line2	sample	-15	15
2021/06/05 16:29:57	IAEA-C2	466	NW	39	21334.3	21454.1	-158.453	-158.564	96	-8.7912	0.00221233	-0.83958	-9.46712	0.00296773	-5.46152	0.00213755	3.83166	0.00300757	6.70563	0.0551305	-0.965022	-13.1982	2.80504	-14.853	-0.0273857	-2.02401	0.0161279	-0.135596	-0.00756027	0.0941558	sample	sample	non ETH-3	0.867653	-3	3	0.732057	sample	1.03528	-0.0214829	0.736399	0.736399	sample	sample	sample	line1	-15	15	-8.80706
2021/06/07 15:43:34	IAEA-C2	467	JF	8	13812.8	13523.9	-114.394	-112.184	80	-8.64836	0.0017595	-0.89215	-9.51924	0.00309961	-5.32951	0.00170284	3.7792	0.00314002	6.93731	0.0768893	-0.630649	0.668059	3.34967	-1.04876	0.000945878	-2.01328	0.0220474	-0.210408	-0.120406	0.132782	sample	sample	non ETH-3	0.801953	-3	3	0.591545	sample	1.03528	-0.0214829	0.588642	0.588642	sample	sample	line2	sample	-8	15
2021/06/15 06:38:49	IAEA-C2	471	NW	24	17722	17709.2	-135.633	-135.562	89	-8.53078	0.00183464	-0.61424	-9.24373	0.00241507	-5.20967	0.00176011	4.05839	0.002447	7.36709	0.0616775	-0.760028	2.47041	2.72249	0.0756907	0.00605261	-1.60351	0.020558	-0.197592	-0.0974762	0.121138	sample	sample	non ETH-3	0.804924	-3	3	0.607332	sample	1.03528	-0.0214829	0.607274	0.607274	sample	sample	line2	sample	-15	15
2021-06-16 21:34:38	IAEA-C2	472	RP	18	18192.9	18235.8	-137.539	-137.368	81	-8.35817	0.00214347	-0.244856	-8.87753	0.00263204	-5.0351	0.00206163	4.42952	0.0026674	7.92833	0.0511338	-0.942009	3.99151	2.889	0.678613	0.00987265	-1.05884	0.0177127	-0.19655	-0.0693992	0.100773	sample	sample	non ETH-3	0.837977	-3	3	0.641427	sample	1.03528	-0.0214829	0.603197	0.603197	sample	sample	line2	sample	-15	15
[truncated: 16 more rows]
[truncated: 6 more columns]
