# Supplementary material for: The fossil bivalve Angulus benedeni benedeni: a potential seasonally resolved stable isotope-based climate archive to investigate Pliocene temperatures in the southern North Sea basin
Source: Copernicus journal article supplement (doi:10.5194/egusphere-2022-951), 2022-10-12
Supplement: Supplementary file 2 [file d18O_GasBench_Benedeni_benedeni.xlsx]

## Sheet: calc
Line	Sample	Δ13c [‰]	std dev [‰]	δ18O [‰]	std dev [‰]	weight [μg]	Ampl 44 [mV]		δ13C corr [‰]	δ13C corr2 [‰]	δ18O regr [‰]
1	acid1	-27.3828	0.0248636	-33.6182	0.0191755	0	2455
2	acid2	-27.365	0.00644205	-33.6154	0.0206591	0	2451
3	acid3	-27.347	0.0188812	-33.5756	0.0250958	0	2456
4	acid4	-27.3454	0.0105499	-33.5878	0.017427	0	2453
5	acid5	-27.3624	0.0158209	-33.5948	0.0195371	0	2451
6	acid6	-27.336	0.0135831	-33.5846	0.0239958	0	2445
7	acid7	-27.4058	0.00804363	-33.5746	0.0217555	0	2448
8	acid8	-27.3544	0.0171697	-33.58	0.0147817	0	2450
9	naxos-1	2.4226	0.0278352	-7.1396	0.0337165	113	6023			2.11967	-6.72542
10	naxos-2	2.1554	0.0192302	-7.4064	0.0428637	85	3847			1.85247	-6.86884
11	Kiel Carbo a	-34.7282	0.0439056	-16.4594	0.0844085	62	2672			-35.0311	-15.8552
12	SG-126-1	1.371	0.070693	2.6252	0.134966	59	1521			1.06807	3.29465
13	SG-126-3	0.7078	0.0506725	1	0.0994585	58	1178			0.404867	1.68889
14	SG-126-4	0.8464	0.0315325	0.4558	0.0714647	52	1921			0.543467	1.10257
15	SG-126-5	1.14	0.0400062	0.1758	0.0621989	90	3002			0.837067	0.761273
16	SG-126-6	1.0986	0.0581919	0.2298	0.0540065	53	1594			0.795667	0.895107
17	SG-126-7	1.048	0.0379144	0.6668	0.0311801	62	2301			0.745067	1.29202
18	SG-126-8	0.877	0.0637652	1.1414	0.0563454	66	2024			0.574067	1.78233
19	SG-126-9	0.6054	0.0219841	2.3294	0.0373336	99	4003			0.302467	2.85812
20	SG-126-10	0.3638	0.0605037	0.9266	0.13461	62	1306			0.0608667	1.60824
21	naxos-3	2.3718	0.0435282	-7.2696	0.0309241	120	4759			2.06887	-6.78375
22	SG-126-11	0.466	0.0425088	0.3278	0.0620701	66	2152			0.163067	0.961468
23	SG-126-12	0.3652	0.0268086	0.7198	0.0884828	62	1937			0.0622667	1.36566
24	SG-126-13	0.0442	0.0362933	0.3094	0.0529179	71	2802			-0.258733	0.906213
25	SG-126-14	0.9364	0.0343264	0.7172	0.0323527	89	3578			0.633467	1.27001
26	SG-126-15	1.0266	0.0479406	0.5198	0.124188	64	1177			0.723667	1.20875
27	SG-126-16	1.2318	0.0837329	2.4896	0.0532194	79	3174			0.928867	3.06532
28	SG-126-17	1.1786	0.0311657	2.1124	0.0247649	118	4907			0.875667	2.58986
29	SG-126-18	0.7754	0.0226451	0.9416	0.06945	74	2800			0.472467	1.53853
30	naxos-4	2.347	0.0384643	-7.5204	0.0807669	84	2097			2.04407	-6.88361
31	Kiel Carbo b	-34.866	0.0104881	-16.4956	0.0555185	75	3271			-35.1689	-15.9254
32	SG-126-19	0.4994	0.0470882	0.464	0.0676314	73	3042			0.196467	1.04721
33	SG-126-20	1.0974	0.0158209	0.005	0.0440284	72	2859			0.794467	0.598581
34	SG-126-21	1.2964	0.0153721	0.2198	0.0526279	66	2867			0.993467	0.812928
35	SG-126-22	0.9144	0.0307539	1.6202	0.0290465	63	2673			0.611467	2.22433
36	SG-126-23	1.1936	0.0125419	1.7856	0.05055	90	3411			0.890667	2.34788
37	SG-126-24	1.584	0.0425617	1.45	0.064923	78	2940			1.28107	2.03899
38	SG-126-25	1.6004	0.0191259	1.0564	0.07695	116	3469			1.29747	1.61539
39	naxos-5	2.4378	0.0444938	-7.2546	0.027419	125	4620			2.13487	-6.76087
40	SG-126-26	1.6448	0.0343322	0.4794	0.0762974	79	3071			1.34187	1.06096
41	SG-126-27	1.6058	0.0181025	0.2064	0.0491864	90	2550			1.30287	0.817501
42	SG-126-28	1.2494	0.035557	-0.0474	0.0419082	90	3214			0.946467	0.526053
43	SG-126-29	0.8004	0.0264348	1.1772	0.0331919	89	3630			0.497467	1.72707
44	SG-126-30	1.115	0.00796869	2.1844	0.0304352	113	4750			0.812067	2.67076
45	SG-126-31	1.362	0.0241557	1.7284	0.0402902	79	3067			1.05907	2.31019
46	SG-126-32	1.3952	0.0225433	1.1244	0.0567697	68	2271			1.09227	1.75132
47	SG-126-33	0.8156	0.0302952	0.2554	0.0762286	76	2471			0.512667	0.870981
48	naxos-6	2.4354	0.0690963	-7.2456	0.0522762	55	7202			2.13247	-6.89827
49	SG-126-34	2.4122	0.0224878	-7.3526	0.0692589	60	4384			2.10927	-6.84549	Naxos-7; switched
50	SG-126-35	0.9088	0.0294228	0.3322	0.0735507	108	2158			0.605867	0.965528
51	SG-126-36	0.8738	0.0185796	1.1054	0.0345297	68	3242			0.570867	1.67727
52	SG-126-37	1.1306	0.0456541	0.3152	0.061743	99	2604			0.827667	0.92324
53	SG-126-38	1.3214	0.0161493	1.9926	0.0213378	98	3730			1.01847	2.5368
54	SG-126-39	0.9298	0.026205	1.7418	0.0304253	77	2773			0.626867	2.34026
55	SG-126-40	0.5988	0.0683645	0.1512	0.105713	63	2058			0.295867	0.790198
56	SG-126-41	1.3918	0.0349314	0.4074	0.073904	72	2245			1.08887	1.03579
57	naxos-7	0.173	0.0358608	1.201	0.0699571	145	3035			-0.129933	1.7846	SG-126-34; switched
58	SG-126-42	1.3948	0.0321045	0.864	0.0443227	100	3185			1.09187	1.4391
59	SG-126-43	1.2458	0.0486025	1.342	0.0239583	85	2890			0.942867	1.93382
60	SG-126-44	0.1406	0.0419202	0.8918	0.0776383	71	2600			-0.162333	1.50007
61	SG-126-45	-0.2684	0.0174871	0.66	0.0473445	87	3564			-0.571333	1.21361
62	SG-126-46	0.473	0.0553399	0.7058	0.0452736	109	2333			0.170067	1.32921
63	SG-126-47	0.7432	0.0171377	0.7802	0.0729705	83	2433			0.440267	1.39794
64	SG-126-48	0.6206	0.0555275	0.941	0.0638592	67	2067			0.317667	1.57949
65	Kiel Carbo c	-34.8626	0.0534864	-16.4914	0.0261304	113	4320			-35.1655	-15.9807
66	naxos-8	2.1906	0.0291084	-7.4784	0.0679654	78	3359			1.88767	-6.91317
67	SG-126-49	-0.097	0.0188547	0.6262	0.0702545	76	2137			-0.399933	1.26072
68	SG-126-50	0.8	0.0480989	-0.0902	0.0708781	52	1642			0.497067	0.572385
69	SG-126-51	0.439	0.0457275	-0.3478	0.0456804	61	1826			0.136067	0.304352
70	SG-126-52	0.4832	0.0432747	0.916	0.10256	59	1939			0.180267	1.56175
71	SG-126-53	-1.1306	0.0306562	0.3854	0.086318	87	2253			-1.43353	1.01334
72	SG-126-54	-0.2018	0.0570061	0.243	0.0756274	81	2782			-0.504733	0.840947
73	SG-126-55	-1.5068	0.0581868	-0.0192	0.0654156	94	1691			-1.80973	0.640607
74	SG-126-9-2	0.1404	0.0293394	1.868	0.0555338	94	2968			-0.162533	2.4554
75	naxos-9	2.3816	0.0356833	-7.344	0.0940239	66	2291			2.07867	-6.71821
76	SG-126-19-2	0.5232	0.040487	0.3618	0.0796568	82	2281			0.220267	0.988154
77	SG-126-28-2	1.2182	0.0224433	-0.1174	0.022963	96	3878			0.915267	0.418404
78	SG-126-39-2	0.5428	0.0312442	1.3358	0.069837	72	2102			0.239867	1.9723
79	SG-126-49-2	0.1428	0.030679	0.6398	0.0845145	85	2598			-0.160133	1.24818
80	SG-127-1	1.463	0.0444803	0.5866	0.0786975	64	2167			1.16007	1.21942
81	SG-127-2	0.8324	0.0812515	0.1464	0.088155	55	1732			0.529467	0.803882
82	SG-127-3	1.0868	0.0315706	0.413	0.0949395	83	2960			0.783867	1.00085
83	SG-127-4	1.213	0.0662571	0.5908	0.0599808	55	1966			0.910067	1.23501
84	SG-127-5	1.155	0.0393954	1.5444	0.0423946	84	2290			0.852067	2.17024
85	Kiel Carbo d	-34.7078	0.059209	-16.648	0.0972008	84	1694			-35.0107	-15.9884
86	naxos-10	2.3622	0.0139176	-7.3462	0.0446341	112	5005			2.05927	-6.8743
87	naxos-11	2.2758	0.0144118	-7.4056	0.0586285	80	3673			1.97287	-6.85817
11	Kiel Carbo a	-34.7282	0.0439056	-16.4594	0.0844085	62	2672		-34.993	-35.0311	-15.8552
31	Kiel Carbo b	-34.866	0.0104881	-16.4956	0.0555185	75	3271		-35.1308	-35.1689	-15.9254
65	Kiel Carbo c	-34.8626	0.0534864	-16.4914	0.0261304	113	4320		-35.1274	-35.1655	-15.9807
85	Kiel Carbo d	-34.7078	0.059209	-16.648	0.0972008	84	1694		-34.9726	-35.0107	-15.9884
		-34.7912		-16.5236					-35.0559	-35.0941	-15.9374
		0.0848873		0.0844943					0.0848873	0.0848873	0.0615554
9	naxos-1	2.4226	0.0278352	-7.1396	0.0337165	113	6023		2.15784	2.11967	-6.72542
10	naxos-2	2.1554	0.0192302	-7.4064	0.0428637	85	3847		1.89064		-6.86884					Naxos		IAEA-CO		Kiel Carbo
21	naxos-3	2.3718	0.0435282	-7.2696	0.0309241	120	4759		2.10704	2.06887	-6.78375					C [‰]		C [‰]		C [‰]
30	naxos-4	2.347	0.0384643	-7.5204	0.0807669	84	2097		2.08224	2.04407	-6.88361					2.08		2.48		-35.64
39	naxos-5	2.4378	0.0444938	-7.2546	0.027419	125	4620		2.17304	2.13487	-6.76087
48	naxos-6	2.4354	0.0690963	-7.2456	0.0522762	55	7202		2.17064	2.13247	-6.89827					O [‰]		O [‰]		O [‰]
49	SG-126-34	2.4122	0.0224878	-7.3526	0.0692589	145	4384	Naxos	2.14744	2.10927	-6.84549					-6.83		-2.43		-16.14
66	naxos-8	2.1906	0.0291084	-7.4784	0.0679654	78	3359		1.92584		-6.91317
75	naxos-9	2.3816	0.0356833	-7.344	0.0940239	66	2291		2.11684	2.07867	-6.71821
86	naxos-10	2.3622	0.0139176	-7.3462	0.0446341	112	5005		2.09744	2.05927	-6.8743
87	naxos-11	2.2758	0.0144118	-7.4056	0.0586285	80	3673		2.01104	1.97287	-6.85817
		2.34476		-7.34209					2.08	2.08	-6.83001
		0.0970849		0.110407					0.0970849	0.0518621	0.0702198
		2.38293
	13C
	18O

## Sheet: pivot paste
Data
Average of Row	code	Average of d 13C/12C [‰]	StdDev of d 13C/12C2 [‰]	Average of d 18O/16O [‰]	StdDev of d 18O/16O2 [‰]	Average of Identifier 2 [μg]	Max of Ampl 44 [mV]
1	acid1	-27.3828	0.0248636	-33.6182	0.0191755	0	2455
2	acid2	-27.365	0.00644205	-33.6154	0.0206591	0	2451
3	acid3	-27.347	0.0188812	-33.5756	0.0250958	0	2456
4	acid4	-27.3454	0.0105499	-33.5878	0.017427	0	2453
5	acid5	-27.3624	0.0158209	-33.5948	0.0195371	0	2451
6	acid6	-27.336	0.0135831	-33.5846	0.0239958	0	2445
7	acid7	-27.4058	0.00804363	-33.5746	0.0217555	0	2448
8	acid8	-27.3544	0.0171697	-33.58	0.0147817	0	2450
11	Kiel Carbo a	-34.7282	0.0439056	-16.4594	0.0844085	62	2672
31	Kiel Carbo b	-34.866	0.0104881	-16.4956	0.0555185	75	3271
65	Kiel Carbo c	-34.8626	0.0534864	-16.4914	0.0261304	113	4320
85	Kiel Carbo d	-34.7078	0.059209	-16.648	0.0972008	84	1694
9	naxos-1	2.4226	0.0278352	-7.1396	0.0337165	113	6023
86	naxos-10	2.3622	0.0139176	-7.3462	0.0446341	112	5005
87	naxos-11	2.2758	0.0144118	-7.4056	0.0586285	80	3673
10	naxos-2	2.1554	0.0192302	-7.4064	0.0428637	85	3847
21	naxos-3	2.3718	0.0435282	-7.2696	0.0309241	120	4759
30	naxos-4	2.347	0.0384643	-7.5204	0.0807669	84	2097
39	naxos-5	2.4378	0.0444938	-7.2546	0.027419	125	4620
48	naxos-6	2.4354	0.0690963	-7.2456	0.0522762	55	7202
57	naxos-7	0.173	0.0358608	1.201	0.0699571	145	3035
66	naxos-8	2.1906	0.0291084	-7.4784	0.0679654	78	3359
75	naxos-9	2.3816	0.0356833	-7.344	0.0940239	66	2291
12	SG-126-1	1.371	0.070693	2.6252	0.134966	59	1521
20	SG-126-10	0.3638	0.0605037	0.9266	0.13461	62	1306
22	SG-126-11	0.466	0.0425088	0.3278	0.0620701	66	2152
23	SG-126-12	0.3652	0.0268086	0.7198	0.0884828	62	1937
24	SG-126-13	0.0442	0.0362933	0.3094	0.0529179	71	2802
25	SG-126-14	0.9364	0.0343264	0.7172	0.0323527	89	3578
26	SG-126-15	1.0266	0.0479406	0.5198	0.124188	64	1177
27	SG-126-16	1.2318	0.0837329	2.4896	0.0532194	79	3174
28	SG-126-17	1.1786	0.0311657	2.1124	0.0247649	118	4907
29	SG-126-18	0.7754	0.0226451	0.9416	0.06945	74	2800
32	SG-126-19	0.4994	0.0470882	0.464	0.0676314	73	3042
76	SG-126-19-2	0.5232	0.040487	0.3618	0.0796568	82	2281
33	SG-126-20	1.0974	0.0158209	0.005	0.0440284	72	2859
34	SG-126-21	1.2964	0.0153721	0.2198	0.0526279	66	2867
35	SG-126-22	0.9144	0.0307539	1.6202	0.0290465	63	2673
36	SG-126-23	1.1936	0.0125419	1.7856	0.05055	90	3411
37	SG-126-24	1.584	0.0425617	1.45	0.064923	78	2940
38	SG-126-25	1.6004	0.0191259	1.0564	0.07695	116	3469
40	SG-126-26	1.6448	0.0343322	0.4794	0.0762974	79	3071
41	SG-126-27	1.6058	0.0181025	0.2064	0.0491864	90	2550
42	SG-126-28	1.2494	0.035557	-0.0474	0.0419082	90	3214
77	SG-126-28-2	1.2182	0.0224433	-0.1174	0.022963	96	3878
43	SG-126-29	0.8004	0.0264348	1.1772	0.0331919	89	3630
13	SG-126-3	0.7078	0.0506725	1	0.0994585	58	1178
44	SG-126-30	1.115	0.00796869	2.1844	0.0304352	113	4750
45	SG-126-31	1.362	0.0241557	1.7284	0.0402902	79	3067
46	SG-126-32	1.3952	0.0225433	1.1244	0.0567697	68	2271
47	SG-126-33	0.8156	0.0302952	0.2554	0.0762286	76	2471
49	SG-126-34	2.4122	0.0224878	-7.3526	0.0692589	60	4384
50	SG-126-35	0.9088	0.0294228	0.3322	0.0735507	108	2158
51	SG-126-36	0.8738	0.0185796	1.1054	0.0345297	68	3242
52	SG-126-37	1.1306	0.0456541	0.3152	0.061743	99	2604
53	SG-126-38	1.3214	0.0161493	1.9926	0.0213378	98	3730
54	SG-126-39	0.9298	0.026205	1.7418	0.0304253	77	2773
78	SG-126-39-2	0.5428	0.0312442	1.3358	0.069837	72	2102
14	SG-126-4	0.8464	0.0315325	0.4558	0.0714647	52	1921
55	SG-126-40	0.5988	0.0683645	0.1512	0.105713	63	2058
56	SG-126-41	1.3918	0.0349314	0.4074	0.073904	72	2245
58	SG-126-42	1.3948	0.0321045	0.864	0.0443227	100	3185
59	SG-126-43	1.2458	0.0486025	1.342	0.0239583	85	2890
60	SG-126-44	0.1406	0.0419202	0.8918	0.0776383	71	2600
61	SG-126-45	-0.2684	0.0174871	0.66	0.0473445	87	3564
62	SG-126-46	0.473	0.0553399	0.7058	0.0452736	109	2333
63	SG-126-47	0.7432	0.0171377	0.7802	0.0729705	83	2433
64	SG-126-48	0.6206	0.0555275	0.941	0.0638592	67	2067
67	SG-126-49	-0.097	0.0188547	0.6262	0.0702545	76	2137
79	SG-126-49-2	0.1428	0.030679	0.6398	0.0845145	85	2598
15	SG-126-5	1.14	0.0400062	0.1758	0.0621989	90	3002
68	SG-126-50	0.8	0.0480989	-0.0902	0.0708781	52	1642
69	SG-126-51	0.439	0.0457275	-0.3478	0.0456804	61	1826
70	SG-126-52	0.4832	0.0432747	0.916	0.10256	59	1939
71	SG-126-53	-1.1306	0.0306562	0.3854	0.086318	87	2253
72	SG-126-54	-0.2018	0.0570061	0.243	0.0756274	81	2782
73	SG-126-55	-1.5068	0.0581868	-0.0192	0.0654156	94	1691
16	SG-126-6	1.0986	0.0581919	0.2298	0.0540065	53	1594
17	SG-126-7	1.048	0.0379144	0.6668	0.0311801	62	2301
18	SG-126-8	0.877	0.0637652	1.1414	0.0563454	66	2024
19	SG-126-9	0.6054	0.0219841	2.3294	0.0373336	99	4003
74	SG-126-9-2	0.1404	0.0293394	1.868	0.0555338	94	2968
80	SG-127-1	1.463	0.0444803	0.5866	0.0786975	64	2167
81	SG-127-2	0.8324	0.0812515	0.1464	0.088155	55	1732
82	SG-127-3	1.0868	0.0315706	0.413	0.0949395	83	2960
83	SG-127-4	1.213	0.0662571	0.5908	0.0599808	55	1966
84	SG-127-5	1.155	0.0393954	1.5444	0.0423946	84	2290

## Sheet: pivot
	Data
code	Average of Row	Average of d 13C/12C [‰]	StdDev of d 13C/12C2 [‰]	Count of d 13C/12C3 [-]	Average of d 18O/16O [‰]	StdDev of d 18O/16O2 [‰]	Average of Identifier 2 [μg]	Max of Ampl 44 [mV]
acid1	1	-27.3828	0.0248636	5	-33.6182	0.0191755	0	2455
acid2	2	-27.365	0.00644205	5	-33.6154	0.0206591	0	2451
acid3	3	-27.347	0.0188812	5	-33.5756	0.0250958	0	2456
acid4	4	-27.3454	0.0105499	5	-33.5878	0.017427	0	2453
acid5	5	-27.3624	0.0158209	5	-33.5948	0.0195371	0	2451
acid6	6	-27.336	0.0135831	5	-33.5846	0.0239958	0	2445
acid7	7	-27.4058	0.00804363	5	-33.5746	0.0217555	0	2448
acid8	8	-27.3544	0.0171697	5	-33.58	0.0147817	0	2450
naxos-1	9	2.4226	0.0278352	5	-7.1396	0.0337165	113	6023
naxos-10	86	2.3622	0.0139176	5	-7.3462	0.0446341	112	5005
naxos-11	87	2.2758	0.0144118	5	-7.4056	0.0586285	80	3673
naxos-2	10	2.1554	0.0192302	5	-7.4064	0.0428637	85	3847
naxos-3	21	2.3718	0.0435282	5	-7.2696	0.0309241	120	4759
naxos-4	30	2.347	0.0384643	5	-7.5204	0.0807669	84	2097
naxos-5	39	2.4378	0.0444938	5	-7.2546	0.027419	125	4620
naxos-6	48	2.4354	0.0690963	5	-7.2456	0.0522762	55	7202
naxos-7	57	0.173	0.0358608	5	1.201	0.0699571	145	3035
naxos-8	66	2.1906	0.0291084	5	-7.4784	0.0679654	78	3359
naxos-9	75	2.3816	0.0356833	5	-7.344	0.0940239	66	2291
FALSE	44	-22.5378	10.7203	435	-27.7797	12.5005	73.4483	7154
Kiel Carbo a	11	-34.7282	0.0439056	5	-16.4594	0.0844085	62	2672
SG-126-1	12	1.371	0.070693	5	2.6252	0.134966	59	1521
SG-126-3	13	0.7078	0.0506725	5	1	0.0994585	58	1178
SG-126-4	14	0.8464	0.0315325	5	0.4558	0.0714647	52	1921
SG-126-5	15	1.14	0.0400062	5	0.1758	0.0621989	90	3002
SG-126-6	16	1.0986	0.0581919	5	0.2298	0.0540065	53	1594
SG-126-7	17	1.048	0.0379144	5	0.6668	0.0311801	62	2301
SG-126-8	18	0.877	0.0637652	5	1.1414	0.0563454	66	2024
SG-126-9	19	0.6054	0.0219841	5	2.3294	0.0373336	99	4003
SG-126-10	20	0.3638	0.0605037	5	0.9266	0.13461	62	1306
SG-126-11	22	0.466	0.0425088	5	0.3278	0.0620701	66	2152
SG-126-12	23	0.3652	0.0268086	5	0.7198	0.0884828	62	1937
SG-126-13	24	0.0442	0.0362933	5	0.3094	0.0529179	71	2802
SG-126-14	25	0.9364	0.0343264	5	0.7172	0.0323527	89	3578
SG-126-15	26	1.0266	0.0479406	5	0.5198	0.124188	64	1177
SG-126-16	27	1.2318	0.0837329	5	2.4896	0.0532194	79	3174
SG-126-17	28	1.1786	0.0311657	5	2.1124	0.0247649	118	4907
SG-126-18	29	0.7754	0.0226451	5	0.9416	0.06945	74	2800
Kiel Carbo b	31	-34.866	0.0104881	5	-16.4956	0.0555185	75	3271
SG-126-19	32	0.4994	0.0470882	5	0.464	0.0676314	73	3042
SG-126-20	33	1.0974	0.0158209	5	0.005	0.0440284	72	2859
SG-126-21	34	1.2964	0.0153721	5	0.2198	0.0526279	66	2867
SG-126-22	35	0.9144	0.0307539	5	1.6202	0.0290465	63	2673
SG-126-23	36	1.1936	0.0125419	5	1.7856	0.05055	90	3411
SG-126-24	37	1.584	0.0425617	5	1.45	0.064923	78	2940
SG-126-25	38	1.6004	0.0191259	5	1.0564	0.07695	116	3469
SG-126-26	40	1.6448	0.0343322	5	0.4794	0.0762974	79	3071
SG-126-27	41	1.6058	0.0181025	5	0.2064	0.0491864	90	2550
SG-126-28	42	1.2494	0.035557	5	-0.0474	0.0419082	90	3214
SG-126-29	43	0.8004	0.0264348	5	1.1772	0.0331919	89	3630
SG-126-30	44	1.115	0.00796869	5	2.1844	0.0304352	113	4750
SG-126-31	45	1.362	0.0241557	5	1.7284	0.0402902	79	3067
SG-126-32	46	1.3952	0.0225433	5	1.1244	0.0567697	68	2271
SG-126-33	47	0.8156	0.0302952	5	0.2554	0.0762286	76	2471
SG-126-34	49	2.4122	0.0224878	5	-7.3526	0.0692589	60	4384
SG-126-35	50	0.9088	0.0294228	5	0.3322	0.0735507	108	2158
SG-126-36	51	0.8738	0.0185796	5	1.1054	0.0345297	68	3242
SG-126-37	52	1.1306	0.0456541	5	0.3152	0.061743	99	2604
SG-126-38	53	1.3214	0.0161493	5	1.9926	0.0213378	98	3730
SG-126-39	54	0.9298	0.026205	5	1.7418	0.0304253	77	2773
SG-126-40	55	0.5988	0.0683645	5	0.1512	0.105713	63	2058
SG-126-41	56	1.3918	0.0349314	5	0.4074	0.073904	72	2245
SG-126-42	58	1.3948	0.0321045	5	0.864	0.0443227	100	3185
SG-126-43	59	1.2458	0.0486025	5	1.342	0.0239583	85	2890
SG-126-44	60	0.1406	0.0419202	5	0.8918	0.0776383	71	2600
SG-126-45	61	-0.2684	0.0174871	5	0.66	0.0473445	87	3564
SG-126-46	62	0.473	0.0553399	5	0.7058	0.0452736	109	2333
SG-126-47	63	0.7432	0.0171377	5	0.7802	0.0729705	83	2433
SG-126-48	64	0.6206	0.0555275	5	0.941	0.0638592	67	2067
Kiel Carbo c	65	-34.8626	0.0534864	5	-16.4914	0.0261304	113	4320
SG-126-49	67	-0.097	0.0188547	5	0.6262	0.0702545	76	2137
SG-126-50	68	0.8	0.0480989	5	-0.0902	0.0708781	52	1642
SG-126-51	69	0.439	0.0457275	5	-0.3478	0.0456804	61	1826
SG-126-52	70	0.4832	0.0432747	5	0.916	0.10256	59	1939
SG-126-53	71	-1.1306	0.0306562	5	0.3854	0.086318	87	2253
SG-126-54	72	-0.2018	0.0570061	5	0.243	0.0756274	81	2782
SG-126-55	73	-1.5068	0.0581868	5	-0.0192	0.0654156	94	1691
SG-126-9-2	74	0.1404	0.0293394	5	1.868	0.0555338	94	2968
SG-126-19-2	76	0.5232	0.040487	5	0.3618	0.0796568	82	2281
SG-126-28-2	77	1.2182	0.0224433	5	-0.1174	0.022963	96	3878
SG-126-39-2	78	0.5428	0.0312442	5	1.3358	0.069837	72	2102
SG-126-49-2	79	0.1428	0.030679	5	0.6398	0.0845145	85	2598
SG-127-1	80	1.463	0.0444803	5	0.5866	0.0786975	64	2167
SG-127-2	81	0.8324	0.0812515	5	0.1464	0.088155	55	1732
SG-127-3	82	1.0868	0.0315706	5	0.413	0.0949395	83	2960
SG-127-4	83	1.213	0.0662571	5	0.5908	0.0599808	55	1966
SG-127-5	84	1.155	0.0393954	5	1.5444	0.0423946	84	2290
Kiel Carbo d	85	-34.7078	0.059209	5	-16.648	0.0972008	84	1694

## Sheet: Tabels
Ampl 44 [mV]
d 13C/12C [‰]
d 18O/16O [‰]

## Sheet: conversion
code	Row	Identifier 1	Identifier 2 [μg]	Analysis	Date	Time	Peak Nr	Rt	Area All	BGD 44	BGD 45	BGD 46	Ampl 44 [mV]	Ampl 45 [mV]	Ampl 46 [mV]	d 13C/12C [‰]	d 18O/16O [‰]
FALSE	1	acid1	0	85881	05/28/21	17:57:44	1	29.3	49.165	1.5	1.8	2.3	2452	2872	3378	-27.263	-33.52
FALSE	1	acid1	0	85881	05/28/21	17:57:44	2	79	49.674	1.8	2	2.8	2452	2872	3379	-27.334	-33.622
FALSE	1	acid1	0	85881	05/28/21	17:57:44	3	128.7	49.591	1.8	2.1	2.9	2451	2870	3377	-27.35	-33.6
FALSE	1	acid1	0	85881	05/28/21	17:57:44	4	178.5	49.645	1.8	2.1	2.8	2453	2872	3378	-27.362	-33.593
FALSE	1	acid1	0	85881	05/28/21	17:57:44	5	228.2	49.788	1.8	2.2	2.9	2456	2876	3383	-27.404	-33.66
acid1	1	acid1	0	85881	05/28/21	17:57:44	6	278	49.716	1.8	2.2	2.9	2451	2870	3376	-27.415	-33.641
acid1	1	acid1	0	85881	05/28/21	17:57:44	7	327.9	49.773	1.8	2.2	2.9	2455	2875	3383	-27.379	-33.613
acid1	1	acid1	0	85881	05/28/21	17:57:44	8	377.7	49.645	1.8	2.2	2.9	2455	2874	3382	-27.361	-33.606
acid1	1	acid1	0	85881	05/28/21	17:57:44	9	427.4	49.76	1.9	2.2	2.9	2453	2872	3378	-27.358	-33.596
acid1	1	acid1	0	85881	05/28/21	17:57:44	10	477.1	49.76	1.8	2.2	2.9	2453	2873	3380	-27.401	-33.635
FALSE	2	acid2	0	85882	05/28/21	18:10:20	1	29.3	49.107	1.4	1.6	2.2	2448	2867	3374	-27.265	-33.569
FALSE	2	acid2	0	85882	05/28/21	18:10:20	2	79	49.633	1.7	2	2.6	2450	2869	3375	-27.356	-33.593
FALSE	2	acid2	0	85882	05/28/21	18:10:20	3	128.7	49.608	1.8	2.1	2.8	2449	2869	3375	-27.35	-33.6
FALSE	2	acid2	0	85882	05/28/21	18:10:20	4	178.5	49.701	1.8	2.1	2.8	2454	2873	3380	-27.37	-33.631
FALSE	2	acid2	0	85882	05/28/21	18:10:20	5	228.2	49.5	1.8	2.2	2.8	2447	2865	3370	-27.39	-33.619
acid2	2	acid2	0	85882	05/28/21	18:10:20	6	278	49.599	1.8	2.2	2.8	2448	2867	3372	-27.372	-33.604
acid2	2	acid2	0	85882	05/28/21	18:10:20	7	327.9	49.588	1.8	2.2	2.9	2448	2867	3374	-27.367	-33.628
acid2	2	acid2	0	85882	05/28/21	18:10:20	8	377.7	49.539	1.8	2.2	2.9	2444	2862	3365	-27.368	-33.643
acid2	2	acid2	0	85882	05/28/21	18:10:20	9	427.4	49.597	1.8	2.2	2.9	2445	2863	3368	-27.355	-33.59
acid2	2	acid2	0	85882	05/28/21	18:10:20	10	477.1	49.634	1.8	2.1	2.9	2451	2870	3377	-27.363	-33.612
FALSE	3	acid3	0	85883	05/28/21	18:22:59	1	29.1	49.132	1.4	1.7	2.2	2450	2869	3375	-27.24	-33.501
FALSE	3	acid3	0	85883	05/28/21	18:22:59	2	79	49.728	1.7	2	2.7	2451	2869	3375	-27.342	-33.571
FALSE	3	acid3	0	85883	05/28/21	18:22:59	3	128.7	49.694	1.7	2.1	2.8	2453	2871	3377	-27.35	-33.6
FALSE	3	acid3	0	85883	05/28/21	18:22:59	4	178.5	49.675	1.8	2.1	2.8	2446	2864	3368	-27.349	-33.601
FALSE	3	acid3	0	85883	05/28/21	18:22:59	5	228.2	49.716	1.8	2.2	2.8	2455	2873	3380	-27.353	-33.56
acid3	3	acid3	0	85883	05/28/21	18:22:59	6	278	49.696	1.8	2.1	2.9	2452	2870	3376	-27.358	-33.565
acid3	3	acid3	0	85883	05/28/21	18:22:59	7	327.9	49.708	1.8	2.2	2.9	2452	2870	3376	-27.331	-33.606
acid3	3	acid3	0	85883	05/28/21	18:22:59	8	377.7	49.678	1.8	2.2	2.8	2452	2871	3377	-27.335	-33.569
acid3	3	acid3	0	85883	05/28/21	18:22:59	9	427.4	49.705	1.8	2.2	2.8	2450	2868	3374	-27.336	-33.543
acid3	3	acid3	0	85883	05/28/21	18:22:59	10	477.1	49.723	1.8	2.2	2.9	2456	2874	3381	-27.375	-33.595
FALSE	4	acid4	0	85884	05/28/21	18:38:46	1	29.3	47.47	1.5	1.7	2.3	2448	2867	3373	-27.258	-33.559
FALSE	4	acid4	0	85884	05/28/21	18:38:46	2	79	49.675	1.7	2.1	2.7	2453	2873	3380	-27.302	-33.558
FALSE	4	acid4	0	85884	05/28/21	18:38:46	3	128.7	49.727	1.8	2.1	2.8	2454	2874	3380	-27.35	-33.6
FALSE	4	acid4	0	85884	05/28/21	18:38:46	4	178.5	49.754	1.8	2.2	2.9	2454	2874	3380	-27.357	-33.595
FALSE	4	acid4	0	85884	05/28/21	18:38:46	5	228.2	49.658	1.8	2.2	2.8	2453	2873	3380	-27.339	-33.609
acid4	4	acid4	0	85884	05/28/21	18:38:46	6	278	49.649	1.8	2.2	2.9	2450	2869	3376	-27.328	-33.602
acid4	4	acid4	0	85884	05/28/21	18:38:46	7	327.7	49.72	1.8	2.2	2.8	2449	2869	3376	-27.353	-33.585
acid4	4	acid4	0	85884	05/28/21	18:38:46	8	377.7	49.724	1.8	2.2	2.9	2453	2873	3380	-27.35	-33.609
acid4	4	acid4	0	85884	05/28/21	18:38:46	9	427.4	49.518	1.8	2.2	2.9	2444	2862	3367	-27.343	-33.568
acid4	4	acid4	0	85884	05/28/21	18:38:46	10	477.1	49.623	1.8	2.2	2.9	2448	2867	3373	-27.353	-33.575
FALSE	5	acid5	0	85885	05/28/21	18:50:22	1	29.3	49.099	1.5	1.7	2.3	2452	2874	3382	-27.301	-33.584
FALSE	5	acid5	0	85885	05/28/21	18:50:22	2	79	49.525	1.7	2	2.7	2443	2862	3368	-27.352	-33.601
FALSE	5	acid5	0	85885	05/28/21	18:50:22	3	128.7	49.652	1.8	2.1	2.8	2452	2873	3380	-27.35	-33.6
FALSE	5	acid5	0	85885	05/28/21	18:50:22	4	178.5	49.588	1.8	2.1	2.9	2443	2862	3368	-27.361	-33.633
FALSE	5	acid5	0	85885	05/28/21	18:50:22	5	228.2	49.572	1.8	2.1	2.8	2442	2861	3367	-27.353	-33.599
acid5	5	acid5	0	85885	05/28/21	18:50:22	6	278	49.636	1.8	2.2	2.8	2450	2870	3377	-27.386	-33.604
acid5	5	acid5	0	85885	05/28/21	18:50:22	7	327.9	49.618	1.8	2.2	2.8	2445	2866	3371	-27.37	-33.621
acid5	5	acid5	0	85885	05/28/21	18:50:22	8	377.7	49.638	1.8	2.2	2.9	2449	2869	3377	-27.346	-33.576
acid5	5	acid5	0	85885	05/28/21	18:50:22	9	427.4	49.601	1.8	2.2	2.9	2451	2872	3379	-27.357	-33.575
acid5	5	acid5	0	85885	05/28/21	18:50:22	10	477.1	49.522	1.8	2.2	2.9	2442	2861	3367	-27.353	-33.598
FALSE	6	acid6	0	85886	05/28/21	19:03:01	1	29.3	49.033	1.4	1.6	2.2	2449	2870	3377	-27.247	-33.557
FALSE	6	acid6	0	85886	05/28/21	19:03:01	2	79	49.518	1.7	2	2.6	2441	2861	3366	-27.319	-33.584
FALSE	6	acid6	0	85886	05/28/21	19:03:01	3	128.7	49.571	1.7	2.1	2.7	2440	2859	3364	-27.35	-33.6
FALSE	6	acid6	0	85886	05/28/21	19:03:01	4	178.5	49.485	1.7	2.1	2.8	2443	2863	3367	-27.364	-33.621
FALSE	6	acid6	0	85886	05/28/21	19:03:01	5	228.2	49.531	1.8	2.1	2.8	2440	2858	3363	-27.324	-33.609
acid6	6	acid6	0	85886	05/28/21	19:03:01	6	278	49.451	1.8	2.1	2.8	2445	2865	3371	-27.342	-33.622
acid6	6	acid6	0	85886	05/28/21	19:03:01	7	327.9	49.457	1.8	2.1	2.8	2437	2856	3361	-27.317	-33.591
acid6	6	acid6	0	85886	05/28/21	19:03:01	8	377.7	49.57	1.8	2.1	2.8	2444	2863	3369	-27.354	-33.562
acid6	6	acid6	0	85886	05/28/21	19:03:01	9	427.4	49.517	1.8	2.2	2.8	2441	2861	3366	-27.335	-33.566
acid6	6	acid6	0	85886	05/28/21	19:03:01	10	477.1	49.504	1.8	2.2	2.8	2443	2863	3369	-27.332	-33.582
FALSE	7	acid7	0	85887	05/28/21	19:15:40	1	29.3	48.851	1.4	1.6	2.2	2433	2851	3354	-27.265	-33.504
FALSE	7	acid7	0	85887	05/28/21	19:15:40	2	79	49.443	1.6	1.9	2.6	2443	2861	3366	-27.345	-33.549
FALSE	7	acid7	0	85887	05/28/21	19:15:40	3	128.7	49.531	1.7	2	2.7	2445	2863	3369	-27.35	-33.6
FALSE	7	acid7	0	85887	05/28/21	19:15:40	4	178.5	49.546	1.7	2.1	2.7	2445	2864	3369	-27.388	-33.562
FALSE	7	acid7	0	85887	05/28/21	19:15:40	5	228.2	49.598	1.8	2.1	2.8	2442	2861	3365	-27.418	-33.585
acid7	7	acid7	0	85887	05/28/21	19:15:40	6	278	49.501	1.8	2.1	2.8	2444	2862	3368	-27.408	-33.537
acid7	7	acid7	0	85887	05/28/21	19:15:40	7	327.7	49.42	1.8	2.1	2.8	2439	2856	3361	-27.399	-33.59
acid7	7	acid7	0	85887	05/28/21	19:15:40	8	377.7	49.488	1.8	2.1	2.8	2447	2866	3372	-27.396	-33.577
acid7	7	acid7	0	85887	05/28/21	19:15:40	9	427.4	49.515	1.8	2.1	2.8	2447	2866	3372	-27.415	-33.58
acid7	7	acid7	0	85887	05/28/21	19:15:40	10	477.1	49.55	1.8	2.1	2.9	2448	2867	3372	-27.411	-33.589
FALSE	8	acid8	0	85888	05/28/21	19:28:21	1	29.3	48.854	1.3	1.6	2.1	2447	2867	3372	-27.23	-33.552
FALSE	8	acid8	0	85888	05/28/21	19:28:21	2	79	49.47	1.6	2	2.6	2445	2864	3369	-27.32	-33.568
FALSE	8	acid8	0	85888	05/28/21	19:28:21	3	128.7	49.58	1.7	2	2.7	2445	2864	3369	-27.35	-33.6
FALSE	8	acid8	0	85888	05/28/21	19:28:21	4	178.5	49.481	1.7	2.1	2.7	2441	2858	3362	-27.357	-33.604
FALSE	8	acid8	0	85888	05/28/21	19:28:21	5	228.4	49.636	1.8	2.1	2.8	2444	2863	3369	-27.357	-33.59
acid8	8	acid8	0	85888	05/28/21	19:28:21	6	278	49.417	1.8	2.1	2.8	2443	2861	3366	-27.336	-33.573
acid8	8	acid8	0	85888	05/28/21	19:28:21	7	327.9	49.533	1.8	2.1	2.7	2444	2863	3368	-27.344	-33.56
acid8	8	acid8	0	85888	05/28/21	19:28:21	8	377.7	49.389	1.8	2.1	2.8	2440	2858	3363	-27.362	-33.598
acid8	8	acid8	0	85888	05/28/21	19:28:21	9	427.4	49.576	1.8	2.1	2.8	2450	2870	3376	-27.38	-33.59
acid8	8	acid8	0	85888	05/28/21	19:28:21	10	477.1	49.453	1.8	2.1	2.8	2441	2858	3363	-27.35	-33.579
FALSE	9	naxos-1	113	85889	05/28/21	19:41:00	1	27.2	44.181	1.3	1.6	2.1	2442	2861	3366	-27.265	-33.557
FALSE	9	naxos-1	113	85889	05/28/21	19:41:00	2	72.9	44.464	1.6	2	2.6	2444	2864	3370	-27.345	-33.619
FALSE	9	naxos-1	113	85889	05/28/21	19:41:00	3	118.7	44.413	1.7	2.1	2.7	2440	2859	3364	-27.35	-33.6
FALSE	9	naxos-1	113	85889	05/28/21	19:41:00	4	164.5	44.468	1.7	2	2.8	2438	2856	3361	-27.365	-33.639
FALSE	9	naxos-1	113	85889	05/28/21	19:41:00	5	209.6	25.483	1.7	2	2.7	5976	7207	8450	2.257	-7.555
naxos-1	9	naxos-1	113	85889	05/28/21	19:41:00	6	269.2	25.616	2.6	3.1	3.9	6023	7267	8523	2.441	-7.168
naxos-1	9	naxos-1	113	85889	05/28/21	19:41:00	7	329	24.6	2.8	3.4	4.3	5798	6995	8187	2.457	-7.098
naxos-1	9	naxos-1	113	85889	05/28/21	19:41:00	8	388.7	23.649	2.9	3.5	4.5	5584	6735	7892	2.405	-7.18
naxos-1	9	naxos-1	113	85889	05/28/21	19:41:00	9	448.5	22.751	3	3.6	4.5	5362	6467	7592	2.387	-7.124
naxos-1	9	naxos-1	113	85889	05/28/21	19:41:00	10	508.1	21.897	3	3.6	4.5	5174	6241	7306	2.423	-7.128
FALSE	10	naxos-2	85	85890	05/28/21	19:53:35	1	27.2	44.213	1.6	1.9	2.5	2450	2870	3377	-27.272	-33.539
FALSE	10	naxos-2	85	85890	05/28/21	19:53:35	2	72.9	44.449	1.8	2.2	2.9	2436	2855	3358	-27.337	-33.609
FALSE	10	naxos-2	85	85890	05/28/21	19:53:35	3	118.7	44.363	1.9	2.2	2.9	2438	2857	3361	-27.35	-33.6
FALSE	10	naxos-2	85	85890	05/28/21	19:53:35	4	164.5	44.491	1.9	2.2	3	2440	2860	3364	-27.343	-33.613
FALSE	10	naxos-2	85	85890	05/28/21	19:53:35	5	209.6	16.264	1.8	2.1	2.8	3819	4604	5390	2.054	-7.778
naxos-2	10	naxos-2	85	85890	05/28/21	19:53:35	6	269.4	16.319	2.3	2.7	3.5	3847	4638	5440	2.156	-7.458
naxos-2	10	naxos-2	85	85890	05/28/21	19:53:35	7	329	15.637	2.4	2.9	3.7	3691	4452	5220	2.165	-7.435
naxos-2	10	naxos-2	85	85890	05/28/21	19:53:35	8	388.7	15.005	2.5	2.9	3.8	3553	4284	5017	2.152	-7.385
naxos-2	10	naxos-2	85	85890	05/28/21	19:53:35	9	448.5	14.402	2.5	3	3.8	3410	4111	4822	2.126	-7.406
naxos-2	10	naxos-2	85	85890	05/28/21	19:53:35	10	508.1	13.869	2.5	2.9	3.8	3280	3955	4636	2.178	-7.348
FALSE	11	Kiel Carbo a	62	85891	05/28/21	20:06:12	1	27.2	44.215	1.5	1.8	2.4	2440	2859	3363	-27.268	-33.573
FALSE	11	Kiel Carbo a	62	85891	05/28/21	20:06:12	2	72.9	44.408	1.8	2.1	2.8	2441	2860	3365	-27.304	-33.615
FALSE	11	Kiel Carbo a	62	85891	05/28/21	20:06:12	3	118.7	44.477	1.8	2.1	2.8	2443	2862	3367	-27.35	-33.6
FALSE	11	Kiel Carbo a	62	85891	05/28/21	20:06:12	4	164.5	44.487	1.8	2.2	2.9	2440	2860	3363	-27.352	-33.634
FALSE	11	Kiel Carbo a	62	85891	05/28/21	20:06:12	5	209.6	11.275	1.7	2.1	2.7	2668	3104	3734	-34.83	-16.816
Kiel Carbo a	11	Kiel Carbo a	62	85891	05/28/21	20:06:12	6	269.4	11.287	2	2.4	3.1	2672	3110	3747	-34.687	-16.56
Kiel Carbo a	11	Kiel Carbo a	62	85891	05/28/21	20:06:12	7	329	10.84	2.1	2.5	3.3	2572	2994	3601	-34.772	-16.49
Kiel Carbo a	11	Kiel Carbo a	62	85891	05/28/21	20:06:12	8	388.7	10.418	2.1	2.5	3.3	2476	2881	3465	-34.685	-16.492
Kiel Carbo a	11	Kiel Carbo a	62	85891	05/28/21	20:06:12	9	448.3	10.013	2.1	2.5	3.2	2375	2764	3331	-34.775	-16.339
Kiel Carbo a	11	Kiel Carbo a	62	85891	05/28/21	20:06:12	10	508.1	9.651	2.1	2.5	3.3	2292	2668	3208	-34.722	-16.416
FALSE	12	SG-126-1	59	85892	05/28/21	20:18:50	1	27.2	44.141	1.4	1.7	2.3	2440	2859	3363	-27.241	-33.6
FALSE	12	SG-126-1	59	85892	05/28/21	20:18:50	2	72.9	44.466	1.7	2	2.7	2441	2860	3365	-27.331	-33.617
FALSE	12	SG-126-1	59	85892	05/28/21	20:18:50	3	118.7	44.472	1.8	2.1	2.8	2446	2865	3371	-27.35	-33.6
FALSE	12	SG-126-1	59	85892	05/28/21	20:18:50	4	164.5	44.445	1.8	2.1	2.8	2444	2863	3369	-27.353	-33.629
FALSE	12	SG-126-1	59	85892	05/28/21	20:18:50	5	209.6	6.42	1.7	2	2.7	1525	1837	2175	0.888	1.891
SG-126-1	12	SG-126-1	59	85892	05/28/21	20:18:50	6	269.2	6.411	1.8	2.1	2.8	1521	1833	2174	1.37	2.534
SG-126-1	12	SG-126-1	59	85892	05/28/21	20:18:50	7	329	6.17	1.8	2.2	2.8	1465	1765	2091	1.277	2.668
SG-126-1	12	SG-126-1	59	85892	05/28/21	20:18:50	8	388.7	5.935	1.8	2.2	2.9	1412	1701	2015	1.351	2.62
SG-126-1	12	SG-126-1	59	85892	05/28/21	20:18:50	9	448.5	5.701	1.8	2.2	2.8	1354	1631	1935	1.474	2.827
SG-126-1	12	SG-126-1	59	85892	05/28/21	20:18:50	10	508.1	5.5	1.8	2.2	2.9	1307	1575	1863	1.383	2.477
FALSE	13	SG-126-3	58	85893	05/28/21	20:31:28	1	27.2	44.174	1.4	1.6	2.2	2440	2859	3364	-27.273	-33.536
FALSE	13	SG-126-3	58	85893	05/28/21	20:31:28	2	72.9	44.445	1.7	2	2.6	2441	2860	3364	-27.343	-33.58
FALSE	13	SG-126-3	58	85893	05/28/21	20:31:28	3	118.7	44.435	1.7	2	2.7	2441	2860	3365	-27.35	-33.6
FALSE	13	SG-126-3	58	85893	05/28/21	20:31:28	4	164.5	44.466	1.8	2.1	2.8	2442	2861	3365	-27.363	-33.553
FALSE	13	SG-126-3	58	85893	05/28/21	20:31:28	5	209.6	4.949	1.7	2	2.7	1176	1416	1675	0.44	0.625
SG-126-3	13	SG-126-3	58	85893	05/28/21	20:31:28	6	269.4	4.959	1.7	2	2.7	1178	1418	1680	0.664	0.947
SG-126-3	13	SG-126-3	58	85893	05/28/21	20:31:28	7	329	4.768	1.7	2	2.7	1133	1365	1617	0.645	1.035
SG-126-3	13	SG-126-3	58	85893	05/28/21	20:31:28	8	388.7	4.577	1.7	2	2.7	1090	1313	1551	0.754	0.917
SG-126-3	13	SG-126-3	58	85893	05/28/21	20:31:28	9	448.5	4.402	1.7	2	2.6	1048	1262	1494	0.723	1.159
SG-126-3	13	SG-126-3	58	85893	05/28/21	20:31:28	10	508.1	4.242	1.7	2	2.7	1009	1215	1437	0.753	0.942
FALSE	14	SG-126-4	52	85894	05/28/21	20:44:04	1	27.2	44.321	1.3	1.6	2.1	2450	2871	3378	-27.225	-33.601
FALSE	14	SG-126-4	52	85894	05/28/21	20:44:04	2	72.9	44.592	1.6	1.9	2.6	2449	2871	3378	-27.299	-33.581
FALSE	14	SG-126-4	52	85894	05/28/21	20:44:04	3	118.7	44.688	1.7	2.1	2.7	2452	2874	3382	-27.35	-33.6
FALSE	14	SG-126-4	52	85894	05/28/21	20:44:04	4	164.5	44.688	1.7	2.1	2.8	2453	2876	3383	-27.322	-33.597
FALSE	14	SG-126-4	52	85894	05/28/21	20:44:04	5	209.6	8.106	1.7	2	2.6	1909	2300	2717	0.66	0.069
SG-126-4	14	SG-126-4	52	85894	05/28/21	20:44:04	6	269.4	8.129	1.8	2.2	2.9	1921	2314	2735	0.832	0.343
SG-126-4	14	SG-126-4	52	85894	05/28/21	20:44:04	7	329.2	7.803	1.9	2.2	2.9	1846	2224	2631	0.837	0.533
SG-126-4	14	SG-126-4	52	85894	05/28/21	20:44:04	8	388.7	7.484	1.9	2.2	3	1771	2134	2527	0.845	0.449
SG-126-4	14	SG-126-4	52	85894	05/28/21	20:44:04	9	448.5	7.19	1.9	2.2	2.9	1706	2055	2430	0.818	0.457
SG-126-4	14	SG-126-4	52	85894	05/28/21	20:44:04	10	508.3	6.935	1.9	2.3	3	1644	1980	2345	0.9	0.497
FALSE	15	SG-126-5	90	85895	05/28/21	20:56:41	1	27.2	44.381	1.4	1.6	2.1	2453	2875	3381	-27.295	-33.518
FALSE	15	SG-126-5	90	85895	05/28/21	20:56:41	2	72.9	44.637	1.7	2	2.6	2453	2873	3381	-27.328	-33.551
FALSE	15	SG-126-5	90	85895	05/28/21	20:56:41	3	118.7	44.615	1.7	2	2.7	2452	2873	3380	-27.35	-33.6
FALSE	15	SG-126-5	90	85895	05/28/21	20:56:41	4	164.5	44.633	1.7	2.1	2.7	2451	2872	3378	-27.364	-33.569
FALSE	15	SG-126-5	90	85895	05/28/21	20:56:41	5	209.6	12.674	1.7	2	2.6	2986	3597	4255	0.974	-0.283
SG-126-5	15	SG-126-5	90	85895	05/28/21	20:56:41	6	269.4	12.722	2	2.4	3.2	3002	3617	4271	1.112	0.111
SG-126-5	15	SG-126-5	90	85895	05/28/21	20:56:41	7	329.2	12.231	2.1	2.6	3.3	2887	3478	4113	1.091	0.135
SG-126-5	15	SG-126-5	90	85895	05/28/21	20:56:41	8	388.9	11.757	2.2	2.6	3.3	2777	3345	3960	1.137	0.188
SG-126-5	15	SG-126-5	90	85895	05/28/21	20:56:41	9	448.5	11.321	2.2	2.6	3.3	2678	3227	3810	1.178	0.172
SG-126-5	15	SG-126-5	90	85895	05/28/21	20:56:41	10	508.3	10.91	2.2	2.6	3.3	2581	3109	3679	1.182	0.273
FALSE	16	SG-126-6	53	85896	05/28/21	21:09:20	1	27.2	44.333	1.4	1.7	2.2	2450	2871	3377	-27.257	-33.56
FALSE	16	SG-126-6	53	85896	05/28/21	21:09:20	2	72.9	44.59	1.7	2	2.6	2450	2871	3377	-27.311	-33.568
FALSE	16	SG-126-6	53	85896	05/28/21	21:09:20	3	118.7	44.644	1.8	2.1	2.7	2451	2871	3378	-27.35	-33.6
FALSE	16	SG-126-6	53	85896	05/28/21	21:09:20	4	164.5	44.618	1.8	2.1	2.8	2451	2871	3378	-27.369	-33.624
FALSE	16	SG-126-6	53	85896	05/28/21	21:09:20	5	209.8	6.758	1.7	2	2.7	1593	1918	2267	0.955	-0.303
SG-126-6	16	SG-126-6	53	85896	05/28/21	21:09:20	6	269.4	6.756	1.8	2.1	2.8	1594	1921	2271	1.044	0.179
SG-126-6	16	SG-126-6	53	85896	05/28/21	21:09:20	7	329.2	6.491	1.8	2.2	2.8	1536	1850	2185	1.059	0.229
SG-126-6	16	SG-126-6	53	85896	05/28/21	21:09:20	8	388.9	6.228	1.8	2.2	2.8	1475	1776	2102	1.105	0.245
SG-126-6	16	SG-126-6	53	85896	05/28/21	21:09:20	9	448.5	5.988	1.8	2.1	2.8	1419	1710	2018	1.193	0.184
SG-126-6	16	SG-126-6	53	85896	05/28/21	21:09:20	10	508.3	5.761	1.8	2.1	2.8	1366	1645	1946	1.092	0.312
FALSE	17	SG-126-7	62	85897	05/28/21	21:21:58	1	27.2	44.337	1.3	1.6	2.1	2454	2873	3380	-27.26	-33.567
FALSE	17	SG-126-7	62	85897	05/28/21	21:21:58	2	72.9	44.647	1.6	1.9	2.5	2449	2868	3373	-27.283	-33.56
FALSE	17	SG-126-7	62	85897	05/28/21	21:21:58	3	118.7	44.706	1.7	2	2.6	2456	2875	3383	-27.35	-33.6
FALSE	17	SG-126-7	62	85897	05/28/21	21:21:58	4	164.5	44.679	1.7	2.1	2.7	2455	2875	3381	-27.339	-33.629
FALSE	17	SG-126-7	62	85897	05/28/21	21:21:58	5	209.8	9.752	1.6	1.9	2.6	2292	2759	3262	0.949	0.272
SG-126-7	17	SG-126-7	62	85897	05/28/21	21:21:58	6	269.6	9.774	1.9	2.2	2.9	2301	2770	3279	1.009	0.631
SG-126-7	17	SG-126-7	62	85897	05/28/21	21:21:58	7	329.2	9.387	1.9	2.3	3	2211	2662	3150	1.07	0.645
SG-126-7	17	SG-126-7	62	85897	05/28/21	21:21:58	8	388.9	9.008	2	2.3	3	2127	2561	3029	1.018	0.707
SG-126-7	17	SG-126-7	62	85897	05/28/21	21:21:58	9	448.5	8.661	2	2.3	3	2045	2463	2914	1.042	0.689
SG-126-7	17	SG-126-7	62	85897	05/28/21	21:21:58	10	508.3	8.306	2	2.3	3	1968	2370	2800	1.101	0.662
FALSE	18	SG-126-8	66	85898	05/28/21	21:34:34	1	27.2	44.32	1.4	1.6	2.1	2450	2870	3376	-27.242	-33.529
FALSE	18	SG-126-8	66	85898	05/28/21	21:34:34	2	72.9	44.6	1.7	1.9	2.6	2448	2868	3374	-27.335	-33.604
FALSE	18	SG-126-8	66	85898	05/28/21	21:34:34	3	118.7	44.615	1.7	2	2.6	2453	2874	3381	-27.35	-33.6
FALSE	18	SG-126-8	66	85898	05/28/21	21:34:34	4	164.5	44.65	1.7	2.1	2.6	2449	2869	3375	-27.388	-33.587
FALSE	18	SG-126-8	66	85898	05/28/21	21:34:34	5	209.8	8.599	1.6	1.9	2.5	2018	2430	2872	0.659	0.619
SG-126-8	18	SG-126-8	66	85898	05/28/21	21:34:34	6	269.6	8.6	1.8	2.2	2.8	2024	2438	2887	0.781	1.057
SG-126-8	18	SG-126-8	66	85898	05/28/21	21:34:34	7	329.2	8.25	1.9	2.2	2.8	1943	2341	2772	0.885	1.194
SG-126-8	18	SG-126-8	66	85898	05/28/21	21:34:34	8	388.9	7.895	1.9	2.2	2.9	1867	2249	2660	0.869	1.166
SG-126-8	18	SG-126-8	66	85898	05/28/21	21:34:34	9	448.5	7.581	1.9	2.2	2.9	1792	2159	2557	0.959	1.178
SG-126-8	18	SG-126-8	66	85898	05/28/21	21:34:34	10	508.3	7.281	1.9	2.2	2.9	1726	2078	2458	0.891	1.112
FALSE	19	SG-126-9	99	85899	05/28/21	21:47:10	1	27.2	44.421	1.3	1.6	2.1	2450	2869	3374	-27.27	-33.503
FALSE	19	SG-126-9	99	85899	05/28/21	21:47:10	2	72.9	44.686	1.6	1.9	2.5	2454	2874	3380	-27.324	-33.581
FALSE	19	SG-126-9	99	85899	05/28/21	21:47:10	3	118.7	44.692	1.7	2	2.6	2456	2876	3383	-27.35	-33.6
FALSE	19	SG-126-9	99	85899	05/28/21	21:47:10	4	164.5	44.653	1.7	2	2.7	2455	2875	3381	-27.354	-33.596
FALSE	19	SG-126-9	99	85899	05/28/21	21:47:10	5	209.8	17.076	1.6	1.9	2.5	3991	4802	5687	0.454	1.957
SG-126-9	19	SG-126-9	99	85899	05/28/21	21:47:10	6	269.6	17.061	2.2	2.6	3.3	4003	4817	5714	0.596	2.366
SG-126-9	19	SG-126-9	99	85899	05/28/21	21:47:10	7	329.2	16.341	2.3	2.8	3.6	3839	4620	5476	0.621	2.3
SG-126-9	19	SG-126-9	99	85899	05/28/21	21:47:10	8	388.9	15.702	2.4	2.8	3.6	3699	4452	5272	0.635	2.32
SG-126-9	19	SG-126-9	99	85899	05/28/21	21:47:10	9	448.7	15.002	2.4	2.8	3.6	3540	4259	5056	0.581	2.371
SG-126-9	19	SG-126-9	99	85899	05/28/21	21:47:10	10	508.3	14.413	2.4	2.9	3.6	3413	4108	4864	0.594	2.29
FALSE	20	SG-126-10	62	85900	05/28/21	21:59:49	1	27.2	44.431	1.4	1.7	2.2	2452	2873	3380	-27.3	-33.581
FALSE	20	SG-126-10	62	85900	05/28/21	21:59:49	2	72.9	44.61	1.7	2	2.6	2455	2876	3384	-27.347	-33.627
FALSE	20	SG-126-10	62	85900	05/28/21	21:59:49	3	118.7	44.771	1.7	2.1	2.6	2458	2880	3388	-27.35	-33.6
FALSE	20	SG-126-10	62	85900	05/28/21	21:59:49	4	164.5	44.647	1.8	2.1	2.7	2449	2869	3374	-27.381	-33.608
FALSE	20	SG-126-10	62	85900	05/28/21	21:59:49	5	209.8	5.554	1.7	2	2.6	1312	1579	1868	0.188	0.471
SG-126-10	20	SG-126-10	62	85900	05/28/21	21:59:49	6	269.6	5.514	1.7	2	2.6	1306	1572	1860	0.334	0.961
SG-126-10	20	SG-126-10	62	85900	05/28/21	21:59:49	7	329.4	5.297	1.7	2.1	2.6	1252	1507	1786	0.303	1.062
SG-126-10	20	SG-126-10	62	85900	05/28/21	21:59:49	8	388.9	5.078	1.7	2	2.6	1204	1449	1713	0.334	0.956
SG-126-10	20	SG-126-10	62	85900	05/28/21	21:59:49	9	448.7	4.886	1.7	2	2.7	1159	1395	1652	0.455	0.7
SG-126-10	20	SG-126-10	62	85900	05/28/21	21:59:49	10	508.3	4.701	1.7	2	2.6	1115	1342	1589	0.393	0.954
FALSE	21	naxos-3	120	85901	05/28/21	22:12:24	1	27.2	44.476	1.3	1.5	2.1	2460	2881	3389	-27.302	-33.595
FALSE	21	naxos-3	120	85901	05/28/21	22:12:24	2	72.9	44.743	1.6	1.9	2.5	2465	2887	3396	-27.355	-33.579
FALSE	21	naxos-3	120	85901	05/28/21	22:12:24	3	118.7	44.768	1.7	2	2.6	2461	2883	3391	-27.35	-33.6
FALSE	21	naxos-3	120	85901	05/28/21	22:12:24	4	164.5	44.906	1.7	2	2.6	2466	2888	3398	-27.385	-33.623
FALSE	21	naxos-3	120	85901	05/28/21	22:12:24	5	209.8	20.224	1.6	1.9	2.6	4744	5720	6702	2.209	-7.748
naxos-3	21	naxos-3	120	85901	05/28/21	22:12:24	6	269.6	20.252	2.3	2.7	3.4	4759	5737	6722	2.324	-7.258
naxos-3	21	naxos-3	120	85901	05/28/21	22:12:24	7	329.4	19.444	2.5	2.9	3.8	4566	5505	6460	2.424	-7.316
naxos-3	21	naxos-3	120	85901	05/28/21	22:12:24	8	388.9	18.736	2.5	3	3.9	4414	5322	6231	2.391	-7.267
naxos-3	21	naxos-3	120	85901	05/28/21	22:12:24	9	448.7	17.979	2.6	3.1	3.9	4234	5104	5983	2.391	-7.231
naxos-3	21	naxos-3	120	85901	05/28/21	22:12:24	10	508.3	17.292	2.6	3.1	3.9	4072	4910	5757	2.329	-7.276
FALSE	22	SG-126-11	66	85902	05/28/21	22:25:01	1	27.2	44.526	1.5	1.7	2.3	2462	2884	3392	-27.224	-33.577
FALSE	22	SG-126-11	66	85902	05/28/21	22:25:01	2	72.9	44.826	1.7	2.1	2.6	2459	2881	3388	-27.322	-33.619
FALSE	22	SG-126-11	66	85902	05/28/21	22:25:01	3	118.7	44.986	1.8	2.1	2.7	2467	2889	3399	-27.35	-33.6
FALSE	22	SG-126-11	66	85902	05/28/21	22:25:01	4	164.5	44.898	1.8	2.1	2.8	2461	2883	3391	-27.338	-33.61
FALSE	22	SG-126-11	66	85902	05/28/21	22:25:01	5	209.8	9.19	1.7	2	2.6	2153	2591	3068	0.296	-0.064
SG-126-11	22	SG-126-11	66	85902	05/28/21	22:25:01	6	269.6	9.137	1.9	2.2	2.9	2152	2590	3061	0.518	0.225
SG-126-11	22	SG-126-11	66	85902	05/28/21	22:25:01	7	329.4	8.764	1.9	2.3	2.9	2066	2486	2944	0.471	0.331
SG-126-11	22	SG-126-11	66	85902	05/28/21	22:25:01	8	388.9	8.372	1.9	2.3	2.9	1977	2380	2816	0.441	0.364
SG-126-11	22	SG-126-11	66	85902	05/28/21	22:25:01	9	448.7	8.062	1.9	2.3	3	1904	2292	2710	0.491	0.387
SG-126-11	22	SG-126-11	66	85902	05/28/21	22:25:01	10	508.5	7.727	1.9	2.3	3	1824	2194	2600	0.409	0.332
FALSE	23	SG-126-12	62	85903	05/28/21	22:37:40	1	27.2	44.555	1.3	1.6	2.1	2462	2883	3392	-27.271	-33.63
FALSE	23	SG-126-12	62	85903	05/28/21	22:37:40	2	72.9	44.802	1.6	1.9	2.5	2463	2885	3393	-27.351	-33.606
FALSE	23	SG-126-12	62	85903	05/28/21	22:37:40	3	118.7	44.922	1.7	2	2.6	2471	2894	3404	-27.35	-33.6
FALSE	23	SG-126-12	62	85903	05/28/21	22:37:40	4	164.5	44.901	1.7	2	2.6	2464	2886	3396	-27.38	-33.625
FALSE	23	SG-126-12	62	85903	05/28/21	22:37:40	5	209.8	8.226	1.6	1.9	2.5	1933	2326	2755	0.251	0.265
SG-126-12	23	SG-126-12	62	85903	05/28/21	22:37:40	6	269.6	8.209	1.8	2.1	2.7	1937	2331	2756	0.33	0.801
SG-126-12	23	SG-126-12	62	85903	05/28/21	22:37:40	7	329.4	7.894	1.8	2.2	2.9	1864	2243	2657	0.363	0.685
SG-126-12	23	SG-126-12	62	85903	05/28/21	22:37:40	8	388.9	7.566	1.8	2.2	2.8	1789	2153	2550	0.351	0.719
SG-126-12	23	SG-126-12	62	85903	05/28/21	22:37:40	9	448.7	7.283	1.8	2.2	2.9	1723	2073	2450	0.398	0.591
SG-126-12	23	SG-126-12	62	85903	05/28/21	22:37:40	10	508.5	7.018	1.8	2.2	2.8	1659	1997	2364	0.384	0.803
FALSE	24	SG-126-13	71	85904	05/28/21	22:50:17	1	27.2	44.606	1.3	1.6	2.1	2462	2883	3391	-27.242	-33.544
FALSE	24	SG-126-13	71	85904	05/28/21	22:50:17	2	72.9	44.788	1.6	1.9	2.4	2466	2888	3397	-27.326	-33.554
FALSE	24	SG-126-13	71	85904	05/28/21	22:50:17	3	118.7	44.835	1.7	2	2.6	2462	2884	3392	-27.35	-33.6
FALSE	24	SG-126-13	71	85904	05/28/21	22:50:17	4	164.5	44.744	1.7	2	2.6	2460	2881	3390	-27.348	-33.554
FALSE	24	SG-126-13	71	85904	05/28/21	22:50:17	5	209.8	11.825	1.6	1.9	2.5	2780	3344	3956	-0.183	-0.032
SG-126-13	24	SG-126-13	71	85904	05/28/21	22:50:17	6	269.6	11.888	1.9	2.3	2.9	2802	3371	3987	0.08	0.32
SG-126-13	24	SG-126-13	71	85904	05/28/21	22:50:17	7	329.4	11.354	2	2.4	3.1	2680	3224	3816	0.007	0.229
SG-126-13	24	SG-126-13	71	85904	05/28/21	22:50:17	8	389.2	10.905	2.1	2.4	3.1	2573	3095	3667	0.01	0.375
SG-126-13	24	SG-126-13	71	85904	05/28/21	22:50:17	9	448.7	10.49	2.1	2.4	3.2	2478	2981	3525	0.042	0.299
SG-126-13	24	SG-126-13	71	85904	05/28/21	22:50:17	10	508.5	10.099	2.1	2.4	3.1	2384	2868	3396	0.082	0.324
FALSE	25	SG-126-14	89	85905	05/28/21	23:02:55	1	27.2	44.58	1.3	1.6	2.1	2464	2886	3394	-27.264	-33.551
FALSE	25	SG-126-14	89	85905	05/28/21	23:02:55	2	72.9	44.686	1.6	1.9	2.5	2458	2879	3387	-27.345	-33.585
FALSE	25	SG-126-14	89	85905	05/28/21	23:02:55	3	118.7	44.76	1.7	2	2.5	2460	2880	3389	-27.35	-33.6
FALSE	25	SG-126-14	89	85905	05/28/21	23:02:55	4	164.5	44.792	1.7	2	2.6	2458	2878	3386	-27.364	-33.601
FALSE	25	SG-126-14	89	85905	05/28/21	23:02:55	5	209.8	15.254	1.6	1.9	2.5	3569	4298	5088	0.789	0.301
SG-126-14	25	SG-126-14	89	85905	05/28/21	23:02:55	6	269.6	15.233	2.1	2.5	3.2	3578	4309	5092	0.97	0.726
SG-126-14	25	SG-126-14	89	85905	05/28/21	23:02:55	7	329.4	14.562	2.2	2.6	3.4	3428	4128	4885	0.954	0.747
SG-126-14	25	SG-126-14	89	85905	05/28/21	23:02:55	8	388.9	13.983	2.3	2.7	3.5	3294	3966	4696	0.904	0.671
SG-126-14	25	SG-126-14	89	85905	05/28/21	23:02:55	9	448.7	13.474	2.3	2.7	3.5	3180	3829	4527	0.959	0.744
SG-126-14	25	SG-126-14	89	85905	05/28/21	23:02:55	10	508.5	12.952	2.3	2.7	3.4	3055	3678	4354	0.895	0.698
FALSE	26	SG-126-15	64	85906	05/28/21	23:15:32	1	27.2	44.403	1.4	1.6	2.1	2456	2877	3383	-27.26	-33.537
FALSE	26	SG-126-15	64	85906	05/28/21	23:15:32	2	72.9	44.705	1.6	2	2.6	2453	2873	3380	-27.331	-33.572
FALSE	26	SG-126-15	64	85906	05/28/21	23:15:32	3	118.7	44.79	1.7	2	2.6	2462	2884	3392	-27.35	-33.6
FALSE	26	SG-126-15	64	85906	05/28/21	23:15:32	4	164.5	44.837	1.7	2.1	2.7	2462	2884	3392	-27.383	-33.589
FALSE	26	SG-126-15	64	85906	05/28/21	23:15:32	5	210	5.01	1.6	1.9	2.5	1180	1420	1680	0.915	0.105
SG-126-15	26	SG-126-15	64	85906	05/28/21	23:15:32	6	269.6	4.977	1.6	1.9	2.5	1177	1417	1673	1.05	0.628
SG-126-15	26	SG-126-15	64	85906	05/28/21	23:15:32	7	329.4	4.758	1.6	2	2.6	1127	1357	1605	0.971	0.329
SG-126-15	26	SG-126-15	64	85906	05/28/21	23:15:32	8	389.2	4.569	1.6	1.9	2.6	1082	1302	1543	0.998	0.481
SG-126-15	26	SG-126-15	64	85906	05/28/21	23:15:32	9	448.7	4.391	1.6	1.9	2.5	1041	1254	1481	1.019	0.629
SG-126-15	26	SG-126-15	64	85906	05/28/21	23:15:32	10	508.5	4.218	1.6	1.9	2.5	1000	1204	1424	1.095	0.532
FALSE	27	SG-126-16	79	85907	05/28/21	23:28:11	1	27.2	44.438	1.2	1.5	1.9	2455	2877	3385	-27.268	-33.55
FALSE	27	SG-126-16	79	85907	05/28/21	23:28:11	2	72.9	44.738	1.5	1.8	2.4	2456	2878	3385	-27.301	-33.58
FALSE	27	SG-126-16	79	85907	05/28/21	23:28:11	3	118.7	44.798	1.6	1.9	2.5	2460	2882	3391	-27.35	-33.6
FALSE	27	SG-126-16	79	85907	05/28/21	23:28:11	4	164.5	44.78	1.6	1.9	2.5	2463	2886	3394	-27.333	-33.558
FALSE	27	SG-126-16	79	85907	05/28/21	23:28:11	5	210	13.547	1.6	1.9	2.4	3167	3816	4527	1.166	2.271
SG-126-16	27	SG-126-16	79	85907	05/28/21	23:28:11	6	269.6	13.498	1.9	2.3	3	3174	3826	4526	1.352	2.522
SG-126-16	27	SG-126-16	79	85907	05/28/21	23:28:11	7	329.4	12.919	2.1	2.5	3.2	3046	3670	4349	1.285	2.498
SG-126-16	27	SG-126-16	79	85907	05/28/21	23:28:11	8	389.2	12.459	2.1	2.6	3.2	2938	3539	4199	1.152	2.553
SG-126-16	27	SG-126-16	79	85907	05/28/21	23:28:11	9	448.7	11.995	2.1	2.5	3.3	2831	3412	4037	1.188	2.418
SG-126-16	27	SG-126-16	79	85907	05/28/21	23:28:11	10	508.5	11.524	2.1	2.5	3.3	2721	3278	3884	1.182	2.457
FALSE	28	SG-126-17	118	85908	05/28/21	23:40:47	1	27.2	44.596	1.3	1.6	2.1	2471	2894	3405	-27.261	-33.57
FALSE	28	SG-126-17	118	85908	05/28/21	23:40:47	2	72.9	44.933	1.6	1.9	2.5	2466	2888	3398	-27.312	-33.6
FALSE	28	SG-126-17	118	85908	05/28/21	23:40:47	3	118.7	44.932	1.7	2	2.5	2470	2893	3404	-27.35	-33.6
FALSE	28	SG-126-17	118	85908	05/28/21	23:40:47	4	164.5	44.975	1.7	2	2.6	2468	2891	3401	-27.37	-33.581
FALSE	28	SG-126-17	118	85908	05/28/21	23:40:47	5	209.8	20.899	1.6	1.9	2.5	4882	5882	6964	1.076	1.723
SG-126-17	28	SG-126-17	118	85908	05/28/21	23:40:47	6	269.6	20.898	2.3	2.7	3.5	4907	5912	6999	1.214	2.121
SG-126-17	28	SG-126-17	118	85908	05/28/21	23:40:47	7	329.4	19.953	2.5	3	3.8	4692	5653	6700	1.169	2.134
SG-126-17	28	SG-126-17	118	85908	05/28/21	23:40:47	8	388.9	19.134	2.6	3.1	3.9	4508	5432	6433	1.207	2.07
SG-126-17	28	SG-126-17	118	85908	05/28/21	23:40:47	9	448.7	18.367	2.6	3.1	3.9	4329	5216	6174	1.14	2.114
SG-126-17	28	SG-126-17	118	85908	05/28/21	23:40:47	10	508.5	17.682	2.6	3.1	3.9	4162	5014	5947	1.163	2.123
FALSE	29	SG-126-18	74	85909	05/28/21	23:53:25	1	27.2	44.572	1.4	1.7	2.2	2463	2885	3394	-27.295	-33.561
FALSE	29	SG-126-18	74	85909	05/28/21	23:53:25	2	72.9	44.949	1.7	2	2.6	2468	2891	3401	-27.367	-33.593
FALSE	29	SG-126-18	74	85909	05/28/21	23:53:25	3	118.7	44.893	1.7	2.1	2.7	2467	2890	3400	-27.35	-33.6
FALSE	29	SG-126-18	74	85909	05/28/21	23:53:25	4	164.5	44.95	1.7	2.1	2.6	2471	2894	3405	-27.356	-33.569
FALSE	29	SG-126-18	74	85909	05/28/21	23:53:25	5	209.8	11.953	1.6	1.9	2.6	2799	3370	3989	0.666	0.609
SG-126-18	29	SG-126-18	74	85909	05/28/21	23:53:25	6	269.6	11.9	1.9	2.3	2.9	2800	3371	3987	0.783	1.046
SG-126-18	29	SG-126-18	74	85909	05/28/21	23:53:25	7	329.4	11.403	2	2.4	3.1	2687	3235	3831	0.775	0.873
SG-126-18	29	SG-126-18	74	85909	05/28/21	23:53:25	8	388.9	10.907	2.1	2.5	3.2	2573	3099	3672	0.759	0.92
SG-126-18	29	SG-126-18	74	85909	05/28/21	23:53:25	9	448.7	10.476	2.1	2.4	3.1	2474	2980	3522	0.809	0.974
SG-126-18	29	SG-126-18	74	85909	05/28/21	23:53:25	10	508.5	10.09	2	2.5	3.2	2381	2867	3396	0.751	0.895
FALSE	30	naxos-4	84	85910	05/29/21	00:06:03	1	27.2	44.664	1.3	1.6	2.1	2469	2892	3402	-27.279	-33.616
FALSE	30	naxos-4	84	85910	05/29/21	00:06:03	2	72.9	44.878	1.6	1.9	2.5	2464	2886	3396	-27.359	-33.612
FALSE	30	naxos-4	84	85910	05/29/21	00:06:03	3	118.7	44.932	1.7	2	2.6	2470	2893	3404	-27.35	-33.6
FALSE	30	naxos-4	84	85910	05/29/21	00:06:03	4	164.5	44.973	1.7	2	2.6	2470	2893	3405	-27.381	-33.638
FALSE	30	naxos-4	84	85910	05/29/21	00:06:03	5	210	8.947	1.6	1.9	2.5	2089	2517	2953	2.224	-7.963
naxos-4	30	naxos-4	84	85910	05/29/21	00:06:03	6	269.6	8.922	1.8	2.1	2.7	2097	2528	2959	2.323	-7.562
naxos-4	30	naxos-4	84	85910	05/29/21	00:06:03	7	329.4	8.513	1.8	2.2	2.8	2005	2417	2835	2.318	-7.574
naxos-4	30	naxos-4	84	85910	05/29/21	00:06:03	8	388.9	8.145	1.8	2.2	2.8	1922	2318	2717	2.335	-7.551
naxos-4	30	naxos-4	84	85910	05/29/21	00:06:03	9	448.7	7.817	1.8	2.2	2.9	1848	2228	2608	2.413	-7.537
naxos-4	30	naxos-4	84	85910	05/29/21	00:06:03	10	508.5	7.49	1.8	2.2	2.8	1771	2135	2505	2.346	-7.378
FALSE	31	Kiel Carbo b	75	85911	05/29/21	00:18:40	1	27.2	44.624	1.3	1.5	2	2470	2892	3402	-27.309	-33.628
FALSE	31	Kiel Carbo b	75	85911	05/29/21	00:18:40	2	72.9	44.946	1.6	1.9	2.5	2470	2892	3403	-27.366	-33.598
FALSE	31	Kiel Carbo b	75	85911	05/29/21	00:18:40	3	118.7	44.955	1.6	1.9	2.5	2470	2892	3402	-27.35	-33.6
FALSE	31	Kiel Carbo b	75	85911	05/29/21	00:18:40	4	164.5	44.987	1.7	2	2.6	2472	2895	3406	-27.376	-33.646
FALSE	31	Kiel Carbo b	75	85911	05/29/21	00:18:40	5	209.8	13.883	1.6	1.9	2.5	3252	3782	4550	-34.986	-16.92
Kiel Carbo b	31	Kiel Carbo b	75	85911	05/29/21	00:18:40	6	269.6	13.898	2	2.3	3.1	3271	3804	4575	-34.859	-16.58
Kiel Carbo b	31	Kiel Carbo b	75	85911	05/29/21	00:18:40	7	329.4	13.325	2.1	2.5	3.2	3141	3652	4398	-34.863	-16.457
Kiel Carbo b	31	Kiel Carbo b	75	85911	05/29/21	00:18:40	8	388.9	12.775	2.1	2.5	3.2	3016	3508	4223	-34.872	-16.492
Kiel Carbo b	31	Kiel Carbo b	75	85911	05/29/21	00:18:40	9	448.7	12.282	2.2	2.5	3.2	2903	3376	4060	-34.855	-16.437
Kiel Carbo b	31	Kiel Carbo b	75	85911	05/29/21	00:18:40	10	508.5	11.809	2.1	2.5	3.3	2788	3241	3904	-34.881	-16.512
FALSE	32	SG-126-19	73	85912	05/29/21	00:31:17	1	27.2	44.645	1.3	1.6	2.1	2472	2896	3408	-27.261	-33.617
FALSE	32	SG-126-19	73	85912	05/29/21	00:31:17	2	72.9	44.911	1.6	1.9	2.4	2469	2892	3403	-27.337	-33.584
FALSE	32	SG-126-19	73	85912	05/29/21	00:31:17	3	118.7	44.938	1.7	2	2.6	2468	2891	3401	-27.35	-33.6
FALSE	32	SG-126-19	73	85912	05/29/21	00:31:17	4	164.5	44.967	1.7	2	2.6	2470	2894	3404	-27.389	-33.653
FALSE	32	SG-126-19	73	85912	05/29/21	00:31:17	5	209.8	12.992	1.6	1.9	2.4	3030	3648	4316	0.346	0.05
SG-126-19	32	SG-126-19	73	85912	05/29/21	00:31:17	6	269.6	12.952	2	2.4	3	3042	3663	4329	0.425	0.394
SG-126-19	32	SG-126-19	73	85912	05/29/21	00:31:17	7	329.4	12.395	2.1	2.4	3.1	2917	3511	4157	0.545	0.433
SG-126-19	32	SG-126-19	73	85912	05/29/21	00:31:17	8	388.9	11.886	2.1	2.5	3.2	2802	3374	3990	0.534	0.571
SG-126-19	32	SG-126-19	73	85912	05/29/21	00:31:17	9	448.7	11.421	2.1	2.5	3.2	2695	3244	3837	0.492	0.483
SG-126-19	32	SG-126-19	73	85912	05/29/21	00:31:17	10	508.5	10.978	2.1	2.5	3.2	2588	3115	3690	0.501	0.439
FALSE	33	SG-126-20	72	85913	05/29/21	00:43:53	1	27.2	44.543	1.3	1.6	2.1	2464	2886	3396	-27.239	-33.602
FALSE	33	SG-126-20	72	85913	05/29/21	00:43:53	2	72.9	44.933	1.6	1.9	2.5	2468	2891	3402	-27.286	-33.594
FALSE	33	SG-126-20	72	85913	05/29/21	00:43:53	3	118.7	44.92	1.6	2	2.6	2466	2889	3399	-27.35	-33.6
FALSE	33	SG-126-20	72	85913	05/29/21	00:43:53	4	164.5	44.84	1.7	2	2.6	2460	2883	3391	-27.352	-33.645
FALSE	33	SG-126-20	72	85913	05/29/21	00:43:53	5	210	12.137	1.6	1.9	2.5	2846	3428	4056	0.982	-0.447
SG-126-20	33	SG-126-20	72	85913	05/29/21	00:43:53	6	269.6	12.151	1.9	2.3	3	2859	3444	4067	1.084	-0.011
SG-126-20	33	SG-126-20	72	85913	05/29/21	00:43:53	7	329.4	11.599	2	2.4	3.1	2733	3291	3892	1.095	0.012
SG-126-20	33	SG-126-20	72	85913	05/29/21	00:43:53	8	388.9	11.166	2	2.4	3.1	2631	3170	3747	1.097	-0.021
SG-126-20	33	SG-126-20	72	85913	05/29/21	00:43:53	9	448.7	10.728	2	2.4	3.1	2529	3046	3601	1.087	0.078
SG-126-20	33	SG-126-20	72	85913	05/29/21	00:43:53	10	508.3	10.312	2	2.4	3.2	2431	2928	3462	1.124	-0.033
FALSE	34	SG-126-21	66	85914	05/29/21	00:56:30	1	27.2	44.448	1.3	1.5	2	2458	2878	3385	-27.259	-33.515
FALSE	34	SG-126-21	66	85914	05/29/21	00:56:30	2	72.9	44.751	1.6	1.9	2.5	2460	2880	3388	-27.322	-33.612
FALSE	34	SG-126-21	66	85914	05/29/21	00:56:30	3	118.7	44.721	1.6	1.9	2.6	2457	2877	3384	-27.35	-33.6
FALSE	34	SG-126-21	66	85914	05/29/21	00:56:30	4	164.5	44.736	1.7	2	2.6	2459	2879	3387	-27.367	-33.596
FALSE	34	SG-126-21	66	85914	05/29/21	00:56:30	5	209.8	12.161	1.6	1.9	2.5	2856	3439	4060	1.162	-0.091
SG-126-21	34	SG-126-21	66	85914	05/29/21	00:56:30	6	269.6	12.164	1.9	2.3	3	2867	3451	4083	1.288	0.151
SG-126-21	34	SG-126-21	66	85914	05/29/21	00:56:30	7	329.2	11.673	2	2.4	3.1	2753	3315	3918	1.28	0.24
SG-126-21	34	SG-126-21	66	85914	05/29/21	00:56:30	8	388.9	11.203	2	2.4	3.1	2648	3188	3765	1.297	0.291
SG-126-21	34	SG-126-21	66	85914	05/29/21	00:56:30	9	448.7	10.769	2	2.4	3.2	2544	3063	3622	1.296	0.191
SG-126-21	34	SG-126-21	66	85914	05/29/21	00:56:30	10	508.3	10.375	2	2.4	3.2	2452	2952	3487	1.321	0.226
FALSE	35	SG-126-22	63	85915	05/29/21	01:09:07	1	27.2	44.623	1.3	1.5	2	2459	2880	3388	-27.265	-33.501
FALSE	35	SG-126-22	63	85915	05/29/21	01:09:07	2	72.9	44.763	1.6	1.9	2.5	2463	2885	3394	-27.321	-33.535
FALSE	35	SG-126-22	63	85915	05/29/21	01:09:07	3	118.7	44.76	1.6	2	2.6	2459	2881	3389	-27.35	-33.6
FALSE	35	SG-126-22	63	85915	05/29/21	01:09:07	4	164.5	44.67	1.7	2	2.6	2456	2877	3385	-27.373	-33.552
FALSE	35	SG-126-22	63	85915	05/29/21	01:09:07	5	209.8	11.353	1.6	1.9	2.5	2668	3213	3798	0.783	1.188
SG-126-22	35	SG-126-22	63	85915	05/29/21	01:09:07	6	269.6	11.35	1.8	2.2	2.8	2673	3218	3812	0.916	1.619
SG-126-22	35	SG-126-22	63	85915	05/29/21	01:09:07	7	329.2	10.866	1.9	2.3	3	2560	3083	3655	0.967	1.575
SG-126-22	35	SG-126-22	63	85915	05/29/21	01:09:07	8	388.9	10.431	2	2.4	3	2465	2969	3510	0.893	1.653
SG-126-22	35	SG-126-22	63	85915	05/29/21	01:09:07	9	448.7	10.008	2	2.4	3.1	2367	2850	3374	0.895	1.636
SG-126-22	35	SG-126-22	63	85915	05/29/21	01:09:07	10	508.3	9.617	2	2.4	3	2271	2735	3238	0.901	1.618
FALSE	36	SG-126-23	90	85916	05/29/21	01:21:43	1	27.2	44.539	1.3	1.5	2.1	2458	2880	3388	-27.267	-33.578
FALSE	36	SG-126-23	90	85916	05/29/21	01:21:43	2	72.9	44.838	1.6	1.9	2.4	2463	2885	3394	-27.329	-33.561
FALSE	36	SG-126-23	90	85916	05/29/21	01:21:43	3	118.7	44.734	1.6	2	2.6	2457	2878	3386	-27.35	-33.6
FALSE	36	SG-126-23	90	85916	05/29/21	01:21:43	4	164.5	44.724	1.6	2	2.5	2456	2878	3385	-27.347	-33.556
FALSE	36	SG-126-23	90	85916	05/29/21	01:21:43	5	209.8	14.511	1.6	1.9	2.5	3401	4096	4844	1.033	1.405
SG-126-23	36	SG-126-23	90	85916	05/29/21	01:21:43	6	269.6	14.507	2	2.4	3.1	3411	4109	4865	1.173	1.866
SG-126-23	36	SG-126-23	90	85916	05/29/21	01:21:43	7	329.4	13.91	2.1	2.5	3.3	3269	3938	4668	1.198	1.773
SG-126-23	36	SG-126-23	90	85916	05/29/21	01:21:43	8	388.9	13.359	2.2	2.6	3.4	3147	3791	4482	1.192	1.726
SG-126-23	36	SG-126-23	90	85916	05/29/21	01:21:43	9	448.7	12.839	2.2	2.6	3.3	3028	3647	4319	1.206	1.784
SG-126-23	36	SG-126-23	90	85916	05/29/21	01:21:43	10	508.3	12.339	2.2	2.6	3.4	2908	3503	4152	1.199	1.779
FALSE	37	SG-126-24	78	85917	05/29/21	01:34:21	1	27.2	44.486	1.3	1.6	2.1	2452	2872	3379	-27.292	-33.585
FALSE	37	SG-126-24	78	85917	05/29/21	01:34:21	2	72.9	44.728	1.6	1.9	2.5	2457	2878	3386	-27.314	-33.577
FALSE	37	SG-126-24	78	85917	05/29/21	01:34:21	3	118.7	44.74	1.6	2	2.6	2457	2877	3386	-27.35	-33.6
FALSE	37	SG-126-24	78	85917	05/29/21	01:34:21	4	164.5	44.711	1.7	2	2.6	2458	2880	3388	-27.367	-33.611
FALSE	37	SG-126-24	78	85917	05/29/21	01:34:21	5	209.8	12.467	1.6	1.9	2.5	2931	3532	4173	1.427	1.071
SG-126-24	37	SG-126-24	78	85917	05/29/21	01:34:21	6	269.6	12.5	1.9	2.3	3	2940	3543	4191	1.59	1.393
SG-126-24	37	SG-126-24	78	85917	05/29/21	01:34:21	7	329.4	11.976	2	2.4	3.1	2818	3395	4024	1.58	1.55
SG-126-24	37	SG-126-24	78	85917	05/29/21	01:34:21	8	388.9	11.49	2	2.5	3.2	2711	3266	3860	1.516	1.391
SG-126-24	37	SG-126-24	78	85917	05/29/21	01:34:21	9	448.7	11.072	2	2.4	3.2	2612	3147	3724	1.603	1.459
SG-126-24	37	SG-126-24	78	85917	05/29/21	01:34:21	10	508.3	10.625	2	2.4	3.2	2509	3023	3580	1.631	1.457
FALSE	38	SG-126-25	116	85918	05/29/21	01:47:02	1	27.2	44.498	1.3	1.6	2.1	2463	2885	3394	-27.282	-33.572
FALSE	38	SG-126-25	116	85918	05/29/21	01:47:02	2	72.9	44.732	1.6	1.9	2.5	2458	2879	3387	-27.283	-33.598
FALSE	38	SG-126-25	116	85918	05/29/21	01:47:02	3	118.7	44.794	1.6	1.9	2.6	2461	2884	3392	-27.35	-33.6
FALSE	38	SG-126-25	116	85918	05/29/21	01:47:02	4	164.5	44.801	1.7	2	2.6	2458	2879	3386	-27.362	-33.612
FALSE	38	SG-126-25	116	85918	05/29/21	01:47:02	5	209.8	14.743	1.6	1.9	2.5	3452	4160	4914	1.402	0.569
SG-126-25	38	SG-126-25	116	85918	05/29/21	01:47:02	6	269.6	14.773	2	2.4	3.2	3469	4180	4939	1.573	0.931
SG-126-25	38	SG-126-25	116	85918	05/29/21	01:47:02	7	329.4	14.166	2.1	2.6	3.3	3328	4010	4746	1.61	1.12
SG-126-25	38	SG-126-25	116	85918	05/29/21	01:47:02	8	388.9	13.57	2.2	2.6	3.3	3194	3850	4549	1.591	1.037
SG-126-25	38	SG-126-25	116	85918	05/29/21	01:47:02	9	448.7	13.03	2.2	2.6	3.4	3078	3709	4387	1.605	1.108
SG-126-25	38	SG-126-25	116	85918	05/29/21	01:47:02	10	508.3	12.498	2.2	2.6	3.4	2954	3560	4208	1.623	1.086
FALSE	39	naxos-5	125	85919	05/29/21	01:59:37	1	27.2	44.503	1.3	1.6	2.1	2459	2881	3389	-27.267	-33.566
FALSE	39	naxos-5	125	85919	05/29/21	01:59:37	2	72.9	44.769	1.6	1.9	2.6	2464	2886	3395	-27.333	-33.588
FALSE	39	naxos-5	125	85919	05/29/21	01:59:37	3	118.7	44.801	1.7	2	2.6	2458	2879	3387	-27.35	-33.6
FALSE	39	naxos-5	125	85919	05/29/21	01:59:37	4	164.5	44.836	1.7	2	2.7	2463	2885	3394	-27.343	-33.604
FALSE	39	naxos-5	125	85919	05/29/21	01:59:37	5	209.8	19.722	1.6	1.9	2.5	4599	5546	6501	2.294	-7.583
naxos-5	39	naxos-5	125	85919	05/29/21	01:59:37	6	269.6	19.723	2.2	2.7	3.4	4620	5570	6526	2.373	-7.246
naxos-5	39	naxos-5	125	85919	05/29/21	01:59:37	7	329.4	18.852	2.4	2.9	3.7	4428	5338	6261	2.438	-7.27
naxos-5	39	naxos-5	125	85919	05/29/21	01:59:37	8	388.9	18.04	2.5	3	3.8	4250	5126	6009	2.495	-7.293
naxos-5	39	naxos-5	125	85919	05/29/21	01:59:37	9	448.7	17.307	2.5	3	3.8	4086	4927	5775	2.456	-7.242
naxos-5	39	naxos-5	125	85919	05/29/21	01:59:37	10	508.3	16.644	2.5	3	3.8	3926	4734	5553	2.427	-7.222
FALSE	40	SG-126-26	79	85920	05/29/21	02:12:15	1	27.2	44.542	1.4	1.6	2.2	2460	2882	3390	-27.228	-33.561
FALSE	40	SG-126-26	79	85920	05/29/21	02:12:15	2	72.9	44.761	1.7	2	2.6	2458	2879	3388	-27.287	-33.603
FALSE	40	SG-126-26	79	85920	05/29/21	02:12:15	3	118.7	44.774	1.7	2	2.6	2461	2883	3392	-27.35	-33.6
FALSE	40	SG-126-26	79	85920	05/29/21	02:12:15	4	164.5	44.753	1.7	2	2.6	2460	2882	3390	-27.335	-33.594
FALSE	40	SG-126-26	79	85920	05/29/21	02:12:15	5	209.8	13.036	1.6	1.9	2.6	3065	3693	4360	1.542	0.024
SG-126-26	40	SG-126-26	79	85920	05/29/21	02:12:15	6	269.6	13.024	2	2.4	3.1	3071	3700	4372	1.616	0.489
SG-126-26	40	SG-126-26	79	85920	05/29/21	02:12:15	7	329.4	12.536	2.1	2.5	3.3	2957	3562	4215	1.612	0.421
SG-126-26	40	SG-126-26	79	85920	05/29/21	02:12:15	8	388.9	11.988	2.1	2.6	3.3	2833	3415	4033	1.634	0.445
SG-126-26	40	SG-126-26	79	85920	05/29/21	02:12:15	9	448.7	11.55	2.1	2.6	3.3	2730	3290	3889	1.675	0.608
SG-126-26	40	SG-126-26	79	85920	05/29/21	02:12:15	10	508.3	11.121	2.1	2.5	3.3	2626	3165	3743	1.687	0.434
FALSE	41	SG-126-27	90	85921	05/29/21	02:24:51	1	27.2	44.534	1.3	1.6	2.1	2458	2879	3387	-27.25	-33.485
FALSE	41	SG-126-27	90	85921	05/29/21	02:24:51	2	72.9	44.75	1.6	1.9	2.6	2458	2880	3387	-27.301	-33.56
FALSE	41	SG-126-27	90	85921	05/29/21	02:24:51	3	118.7	44.786	1.7	2	2.6	2461	2883	3391	-27.35	-33.6
FALSE	41	SG-126-27	90	85921	05/29/21	02:24:51	4	164.5	44.772	1.7	2	2.6	2458	2879	3386	-27.378	-33.521
FALSE	41	SG-126-27	90	85921	05/29/21	02:24:51	5	209.8	10.815	1.6	1.9	2.6	2541	3061	3617	1.39	-0.192
SG-126-27	41	SG-126-27	90	85921	05/29/21	02:24:51	6	269.6	10.827	1.9	2.3	2.9	2550	3072	3629	1.62	0.246
SG-126-27	41	SG-126-27	90	85921	05/29/21	02:24:51	7	329.4	10.387	2	2.4	3.1	2449	2951	3491	1.593	0.17
SG-126-27	41	SG-126-27	90	85921	05/29/21	02:24:51	8	388.9	9.959	2	2.4	3.1	2355	2838	3352	1.597	0.16
SG-126-27	41	SG-126-27	90	85921	05/29/21	02:24:51	9	448.7	9.596	2	2.4	3.1	2272	2738	3235	1.589	0.185
SG-126-27	41	SG-126-27	90	85921	05/29/21	02:24:51	10	508.5	9.233	2	2.4	3.1	2182	2628	3110	1.63	0.271
FALSE	42	SG-126-28	90	85922	05/29/21	02:37:28	1	27.2	44.499	1.3	1.6	2.1	2459	2881	3389	-27.256	-33.597
FALSE	42	SG-126-28	90	85922	05/29/21	02:37:28	2	72.9	44.729	1.6	1.9	2.5	2461	2883	3391	-27.303	-33.623
FALSE	42	SG-126-28	90	85922	05/29/21	02:37:28	3	118.7	44.783	1.6	2	2.6	2460	2881	3389	-27.35	-33.6
FALSE	42	SG-126-28	90	85922	05/29/21	02:37:28	4	164.5	44.751	1.7	2	2.6	2455	2875	3382	-27.312	-33.577
FALSE	42	SG-126-28	90	85922	05/29/21	02:37:28	5	209.8	13.652	1.6	1.9	2.6	3205	3861	4558	1.059	-0.551
SG-126-28	42	SG-126-28	90	85922	05/29/21	02:37:28	6	269.6	13.669	2	2.4	3.1	3214	3872	4571	1.215	-0.117
SG-126-28	42	SG-126-28	90	85922	05/29/21	02:37:28	7	329.4	13.153	2.1	2.5	3.2	3093	3725	4404	1.25	-0.034
SG-126-28	42	SG-126-28	90	85922	05/29/21	02:37:28	8	388.9	12.587	2.1	2.6	3.3	2970	3577	4231	1.297	-0.053
SG-126-28	42	SG-126-28	90	85922	05/29/21	02:37:28	9	448.7	12.102	2.1	2.6	3.3	2863	3448	4074	1.215	-0.011
SG-126-28	42	SG-126-28	90	85922	05/29/21	02:37:28	10	508.3	11.591	2.1	2.6	3.3	2738	3298	3902	1.27	-0.022
FALSE	43	SG-126-29	89	85923	05/29/21	02:50:06	1	27.2	44.566	1.3	1.6	2.1	2467	2889	3399	-27.282	-33.553
FALSE	43	SG-126-29	89	85923	05/29/21	02:50:06	2	72.9	44.839	1.6	1.9	2.5	2464	2886	3395	-27.35	-33.576
FALSE	43	SG-126-29	89	85923	05/29/21	02:50:06	3	118.7	44.773	1.7	2	2.6	2459	2880	3389	-27.35	-33.6
FALSE	43	SG-126-29	89	85923	05/29/21	02:50:06	4	164.5	44.768	1.7	2	2.7	2466	2888	3397	-27.384	-33.602
FALSE	43	SG-126-29	89	85923	05/29/21	02:50:06	5	210	15.494	1.6	1.9	2.5	3612	4348	5152	0.63	0.774
SG-126-29	43	SG-126-29	89	85923	05/29/21	02:50:06	6	269.6	15.491	2.1	2.5	3.2	3630	4371	5171	0.775	1.135
SG-126-29	43	SG-126-29	89	85923	05/29/21	02:50:06	7	329.4	14.828	2.2	2.7	3.4	3488	4200	4967	0.801	1.214
SG-126-29	43	SG-126-29	89	85923	05/29/21	02:50:06	8	389.2	14.192	2.2	2.7	3.5	3346	4028	4774	0.797	1.165
SG-126-29	43	SG-126-29	89	85923	05/29/21	02:50:06	9	448.7	13.63	2.2	2.7	3.5	3217	3874	4580	0.844	1.208
SG-126-29	43	SG-126-29	89	85923	05/29/21	02:50:06	10	508.5	13.102	2.2	2.7	3.5	3093	3724	4411	0.785	1.164
FALSE	44	SG-126-30	113	85924	05/29/21	03:02:43	1	27.2	44.439	1.4	1.6	2.2	2465	2887	3397	-27.267	-33.611
FALSE	44	SG-126-30	113	85924	05/29/21	03:02:43	2	72.9	44.79	1.6	1.9	2.6	2463	2886	3395	-27.338	-33.613
FALSE	44	SG-126-30	113	85924	05/29/21	03:02:43	3	118.7	44.824	1.7	2	2.6	2463	2885	3394	-27.35	-33.6
FALSE	44	SG-126-30	113	85924	05/29/21	03:02:43	4	164.5	44.882	1.7	2	2.7	2466	2888	3398	-27.412	-33.68
FALSE	44	SG-126-30	113	85924	05/29/21	03:02:43	5	209.8	20.216	1.6	1.9	2.6	4725	5692	6744	0.952	1.823
SG-126-30	44	SG-126-30	113	85924	05/29/21	03:02:43	6	269.6	20.264	2.3	2.7	3.6	4750	5721	6769	1.111	2.154
SG-126-30	44	SG-126-30	113	85924	05/29/21	03:02:43	7	329.4	19.44	2.5	3	3.9	4566	5500	6516	1.121	2.154
SG-126-30	44	SG-126-30	113	85924	05/29/21	03:02:43	8	388.9	18.64	2.5	3.1	3.9	4389	5288	6271	1.115	2.196
SG-126-30	44	SG-126-30	113	85924	05/29/21	03:02:43	9	448.7	17.908	2.6	3.1	3.9	4226	5090	6024	1.124	2.225
SG-126-30	44	SG-126-30	113	85924	05/29/21	03:02:43	10	508.5	17.189	2.6	3.1	3.9	4055	4883	5788	1.104	2.193
FALSE	45	SG-126-31	79	85925	05/29/21	03:15:21	1	27.2	44.618	1.4	1.7	2.2	2464	2886	3395	-27.276	-33.55
FALSE	45	SG-126-31	79	85925	05/29/21	03:15:21	2	72.9	44.862	1.7	2	2.6	2465	2887	3395	-27.339	-33.561
FALSE	45	SG-126-31	79	85925	05/29/21	03:15:21	3	118.7	44.823	1.7	2.1	2.7	2467	2889	3398	-27.35	-33.6
FALSE	45	SG-126-31	79	85925	05/29/21	03:15:21	4	164.5	44.791	1.7	2.1	2.7	2466	2888	3397	-27.396	-33.61
FALSE	45	SG-126-31	79	85925	05/29/21	03:15:21	5	210	13.086	1.6	2	2.6	3061	3687	4366	1.176	1.272
SG-126-31	45	SG-126-31	79	85925	05/29/21	03:15:21	6	269.6	13.084	2	2.4	3.1	3067	3695	4378	1.348	1.766
SG-126-31	45	SG-126-31	79	85925	05/29/21	03:15:21	7	329.4	12.557	2.1	2.5	3.3	2951	3555	4203	1.378	1.661
SG-126-31	45	SG-126-31	79	85925	05/29/21	03:15:21	8	389.2	12.022	2.1	2.6	3.4	2836	3417	4048	1.39	1.747
SG-126-31	45	SG-126-31	79	85925	05/29/21	03:15:21	9	448.7	11.558	2.1	2.6	3.3	2729	3288	3888	1.365	1.742
SG-126-31	45	SG-126-31	79	85925	05/29/21	03:15:21	10	508.5	11.13	2.1	2.6	3.3	2630	3168	3750	1.329	1.726
FALSE	46	SG-126-32	68	85926	05/29/21	03:28:00	1	27.2	44.507	1.3	1.6	2.1	2460	2881	3390	-27.292	-33.551
FALSE	46	SG-126-32	68	85926	05/29/21	03:28:00	2	72.9	44.785	1.6	2	2.6	2457	2877	3385	-27.355	-33.631
FALSE	46	SG-126-32	68	85926	05/29/21	03:28:00	3	118.7	44.772	1.7	2	2.7	2461	2882	3390	-27.35	-33.6
FALSE	46	SG-126-32	68	85926	05/29/21	03:28:00	4	164.5	44.819	1.7	2	2.7	2464	2885	3394	-27.358	-33.625
FALSE	46	SG-126-32	68	85926	05/29/21	03:28:00	5	210	9.71	1.6	1.9	2.6	2266	2729	3226	1.171	0.668
SG-126-32	46	SG-126-32	68	85926	05/29/21	03:28:00	6	269.8	9.702	1.8	2.2	2.9	2271	2736	3241	1.405	1.217
SG-126-32	46	SG-126-32	68	85926	05/29/21	03:28:00	7	329.4	9.272	1.9	2.3	3	2181	2628	3105	1.363	1.077
SG-126-32	46	SG-126-32	68	85926	05/29/21	03:28:00	8	389.2	8.873	1.9	2.3	3	2093	2521	2982	1.397	1.131
SG-126-32	46	SG-126-32	68	85926	05/29/21	03:28:00	9	448.7	8.509	1.9	2.3	3	2008	2419	2862	1.424	1.117
SG-126-32	46	SG-126-32	68	85926	05/29/21	03:28:00	10	508.5	8.19	1.9	2.3	3	1935	2330	2756	1.387	1.08
FALSE	47	SG-126-33	76	85927	05/29/21	03:40:36	1	27.2	44.47	1.3	1.5	2.1	2459	2881	3389	-27.264	-33.558
FALSE	47	SG-126-33	76	85927	05/29/21	03:40:36	2	72.9	44.745	1.6	1.9	2.5	2461	2882	3390	-27.334	-33.567
FALSE	47	SG-126-33	76	85927	05/29/21	03:40:36	3	118.7	44.771	1.6	2	2.6	2457	2878	3386	-27.35	-33.6
FALSE	47	SG-126-33	76	85927	05/29/21	03:40:36	4	164.5	44.73	1.7	2	2.6	2455	2875	3383	-27.397	-33.642
FALSE	47	SG-126-33	76	85927	05/29/21	03:40:36	5	210	10.53	1.6	1.9	2.6	2465	2967	3509	0.628	-0.202
SG-126-33	47	SG-126-33	76	85927	05/29/21	03:40:36	6	269.8	10.535	1.9	2.2	2.9	2471	2975	3522	0.826	0.188
SG-126-33	47	SG-126-33	76	85927	05/29/21	03:40:36	7	329.4	10.103	1.9	2.3	3.1	2377	2862	3380	0.791	0.162
SG-126-33	47	SG-126-33	76	85927	05/29/21	03:40:36	8	389.2	9.669	1.9	2.4	3.1	2283	2748	3252	0.819	0.307
SG-126-33	47	SG-126-33	76	85927	05/29/21	03:40:36	9	448.7	9.305	2	2.4	3	2199	2647	3130	0.783	0.336
SG-126-33	47	SG-126-33	76	85927	05/29/21	03:40:36	10	508.5	8.959	2	2.3	3.1	2118	2550	3014	0.859	0.284
FALSE	48	naxos-6	55	85928	05/29/21	03:53:15	1	27.2	44.392	1.3	1.6	2.1	2457	2878	3385	-27.267	-33.524
FALSE	48	naxos-6	55	85928	05/29/21	03:53:15	2	72.9	44.719	1.6	1.9	2.6	2460	2882	3389	-27.317	-33.567
FALSE	48	naxos-6	55	85928	05/29/21	03:53:15	3	118.7	44.748	1.7	2	2.6	2459	2880	3387	-27.35	-33.6
FALSE	48	naxos-6	55	85928	05/29/21	03:53:15	4	164.5	44.752	1.7	2	2.6	2457	2878	3386	-27.337	-33.558
FALSE	48	naxos-6	55	85928	05/29/21	03:53:15	5	210	30.702	1.6	1.9	2.6	7154	8624	10119	2.373	-7.515
naxos-6	48	naxos-6	55	85928	05/29/21	03:53:15	6	269.6	30.774	2.7	3.3	4.1	7202	8686	10169	2.535	-7.188
naxos-6	48	naxos-6	55	85928	05/29/21	03:53:15	7	329.4	29.465	3	3.7	4.6	6914	8336	9774	2.468	-7.196
naxos-6	48	naxos-6	55	85928	05/29/21	03:53:15	8	389.2	28.351	3.2	3.8	4.8	6668	8039	9436	2.404	-7.3
naxos-6	48	naxos-6	55	85928	05/29/21	03:53:15	9	448.7	27.274	3.2	3.8	4.8	6423	7744	9065	2.417	-7.252
naxos-6	48	naxos-6	55	85928	05/29/21	03:53:15	10	508.5	26.23	3.2	3.9	4.9	6176	7446	8728	2.353	-7.292
FALSE	49	SG-126-34	60	85929	05/29/21	04:05:53	1	27.2	44.644	1.6	1.9	2.5	2467	2889	3399	-27.266	-33.558
FALSE	49	SG-126-34	60	85929	05/29/21	04:05:53	2	72.9	44.836	1.8	2.1	2.9	2465	2887	3396	-27.329	-33.604
FALSE	49	SG-126-34	60	85929	05/29/21	04:05:53	3	118.7	44.897	1.8	2.2	2.9	2464	2886	3394	-27.35	-33.6
FALSE	49	SG-126-34	60	85929	05/29/21	04:05:53	4	164.5	44.872	1.8	2.2	2.9	2468	2890	3400	-27.372	-33.629
FALSE	49	SG-126-34	60	85929	05/29/21	04:05:53	5	210	18.737	1.7	2.1	2.8	4383	5282	6193	2.234	-7.852
SG-126-34	49	SG-126-34	60	85929	05/29/21	04:05:53	6	269.6	18.675	2.3	2.8	3.6	4384	5286	6193	2.408	-7.42
SG-126-34	49	SG-126-34	60	85929	05/29/21	04:05:53	7	329.4	17.921	2.5	3	3.9	4218	5084	5955	2.378	-7.409
SG-126-34	49	SG-126-34	60	85929	05/29/21	04:05:53	8	389.2	17.148	2.5	3.1	3.9	4042	4871	5713	2.437	-7.356
SG-126-34	49	SG-126-34	60	85929	05/29/21	04:05:53	9	448.7	16.476	2.6	3.1	3.9	3881	4679	5483	2.411	-7.248
SG-126-34	49	SG-126-34	60	85929	05/29/21	04:05:53	10	508.5	15.819	2.6	3.1	3.9	3727	4493	5266	2.427	-7.33
FALSE	50	SG-126-35	108	85930	05/29/21	04:18:29	1	27.2	44.586	1.5	1.8	2.3	2468	2891	3401	-27.22	-33.52
FALSE	50	SG-126-35	108	85930	05/29/21	04:18:29	2	72.9	44.816	1.8	2.1	2.7	2459	2879	3388	-27.326	-33.554
FALSE	50	SG-126-35	108	85930	05/29/21	04:18:29	3	118.7	44.834	1.8	2.2	2.9	2463	2884	3393	-27.35	-33.6
FALSE	50	SG-126-35	108	85930	05/29/21	04:18:29	4	164.5	44.908	1.8	2.2	2.9	2465	2886	3395	-27.318	-33.595
FALSE	50	SG-126-35	108	85930	05/29/21	04:18:29	5	210	9.212	1.7	2.1	2.7	2162	2603	3076	0.779	-0.149
SG-126-35	50	SG-126-35	108	85930	05/29/21	04:18:29	6	269.8	9.178	1.9	2.3	3.1	2158	2598	3076	0.869	0.22
SG-126-35	50	SG-126-35	108	85930	05/29/21	04:18:29	7	329.4	8.803	2	2.4	3.1	2074	2497	2950	0.907	0.329
SG-126-35	50	SG-126-35	108	85930	05/29/21	04:18:29	8	389.2	8.437	2	2.4	3.1	1990	2395	2835	0.91	0.327
SG-126-35	50	SG-126-35	108	85930	05/29/21	04:18:29	9	448.7	8.112	2	2.4	3.1	1915	2306	2726	0.952	0.422
SG-126-35	50	SG-126-35	108	85930	05/29/21	04:18:29	10	508.5	7.818	2	2.4	3.1	1845	2221	2627	0.906	0.363
FALSE	51	SG-126-36	68	85931	05/29/21	04:31:05	1	27.2	44.523	1.4	1.7	2.3	2465	2887	3396	-27.276	-33.585
FALSE	51	SG-126-36	68	85931	05/29/21	04:31:05	2	72.9	44.854	1.7	2	2.6	2468	2890	3400	-27.369	-33.565
FALSE	51	SG-126-36	68	85931	05/29/21	04:31:05	3	118.7	44.807	1.8	2.1	2.8	2464	2886	3394	-27.35	-33.6
FALSE	51	SG-126-36	68	85931	05/29/21	04:31:05	4	164.5	44.864	1.8	2.1	2.8	2465	2886	3396	-27.325	-33.561
FALSE	51	SG-126-36	68	85931	05/29/21	04:31:05	5	210	13.811	1.7	2	2.7	3241	3902	4619	0.748	0.68
SG-126-36	51	SG-126-36	68	85931	05/29/21	04:31:05	6	269.6	13.783	2.1	2.5	3.3	3242	3904	4619	0.856	1.051
SG-126-36	51	SG-126-36	68	85931	05/29/21	04:31:05	7	329.4	13.254	2.2	2.7	3.5	3125	3762	4451	0.862	1.138
SG-126-36	51	SG-126-36	68	85931	05/29/21	04:31:05	8	389.2	12.727	2.3	2.7	3.6	3001	3613	4282	0.876	1.11
SG-126-36	51	SG-126-36	68	85931	05/29/21	04:31:05	9	448.7	12.265	2.3	2.7	3.6	2894	3484	4121	0.871	1.097
SG-126-36	51	SG-126-36	68	85931	05/29/21	04:31:05	10	508.5	11.805	2.3	2.8	3.6	2785	3353	3967	0.904	1.131
FALSE	52	SG-126-37	99	85932	05/29/21	04:43:43	1	27.2	44.619	1.5	1.8	2.3	2462	2884	3393	-27.235	-33.539
FALSE	52	SG-126-37	99	85932	05/29/21	04:43:43	2	72.9	44.881	1.8	2.1	2.8	2472	2895	3406	-27.288	-33.572
FALSE	52	SG-126-37	99	85932	05/29/21	04:43:43	3	118.7	44.823	1.8	2.2	2.8	2466	2888	3398	-27.35	-33.6
FALSE	52	SG-126-37	99	85932	05/29/21	04:43:43	4	164.5	44.818	1.8	2.2	2.9	2462	2883	3391	-27.378	-33.626
FALSE	52	SG-126-37	99	85932	05/29/21	04:43:43	5	210	11.079	1.7	2.1	2.8	2597	3126	3697	0.898	-0.084
SG-126-37	52	SG-126-37	99	85932	05/29/21	04:43:43	6	269.6	11.098	2	2.4	3.2	2604	3136	3711	1.162	0.32
SG-126-37	52	SG-126-37	99	85932	05/29/21	04:43:43	7	329.4	10.643	2.1	2.6	3.4	2504	3016	3561	1.159	0.223
SG-126-37	52	SG-126-37	99	85932	05/29/21	04:43:43	8	389.2	10.192	2.1	2.6	3.4	2405	2896	3425	1.165	0.397
SG-126-37	52	SG-126-37	99	85932	05/29/21	04:43:43	9	448.7	9.795	2.1	2.6	3.4	2312	2784	3291	1.105	0.321
SG-126-37	52	SG-126-37	99	85932	05/29/21	04:43:43	10	508.5	9.425	2.1	2.6	3.4	2226	2681	3170	1.062	0.315
FALSE	53	SG-126-38	98	85933	05/29/21	04:56:22	1	27.2	44.601	1.5	1.8	2.4	2463	2884	3393	-27.304	-33.583
FALSE	53	SG-126-38	98	85933	05/29/21	04:56:22	2	72.9	44.8	1.8	2.1	2.8	2463	2885	3394	-27.349	-33.575
FALSE	53	SG-126-38	98	85933	05/29/21	04:56:22	3	118.7	44.76	1.8	2.2	2.9	2460	2881	3389	-27.35	-33.6
FALSE	53	SG-126-38	98	85933	05/29/21	04:56:22	4	164.5	44.79	1.8	2.2	2.9	2464	2886	3394	-27.387	-33.566
FALSE	53	SG-126-38	98	85933	05/29/21	04:56:22	5	210	15.897	1.8	2.1	2.9	3730	4492	5325	1.254	1.628
SG-126-38	53	SG-126-38	98	85933	05/29/21	04:56:22	6	269.6	15.88	2.3	2.8	3.6	3730	4494	5314	1.336	2.006
SG-126-38	53	SG-126-38	98	85933	05/29/21	04:56:22	7	329.4	15.276	2.4	2.9	3.8	3591	4326	5119	1.326	1.971
SG-126-38	53	SG-126-38	98	85933	05/29/21	04:56:22	8	389.2	14.679	2.5	3	3.9	3455	4161	4931	1.316	2.016
SG-126-38	53	SG-126-38	98	85933	05/29/21	04:56:22	9	448.7	14.102	2.5	3	4	3324	4005	4739	1.296	2.001
SG-126-38	53	SG-126-38	98	85933	05/29/21	04:56:22	10	508.5	13.57	2.5	3	4	3202	3856	4567	1.333	1.969
FALSE	54	SG-126-39	77	85934	05/29/21	05:08:59	1	27.2	44.545	1.5	1.8	2.5	2462	2884	3392	-27.264	-33.543
FALSE	54	SG-126-39	77	85934	05/29/21	05:08:59	2	72.9	44.746	1.8	2.2	2.9	2457	2878	3385	-27.351	-33.581
FALSE	54	SG-126-39	77	85934	05/29/21	05:08:59	3	118.7	44.779	1.9	2.2	3	2459	2880	3388	-27.35	-33.6
FALSE	54	SG-126-39	77	85934	05/29/21	05:08:59	4	164.5	44.758	1.9	2.3	3	2457	2877	3385	-27.353	-33.597
FALSE	54	SG-126-39	77	85934	05/29/21	05:08:59	5	210	11.86	1.8	2.1	2.9	2771	3335	3952	0.781	1.337
SG-126-39	54	SG-126-39	77	85934	05/29/21	05:08:59	6	269.6	11.83	2.1	2.5	3.4	2773	3339	3952	0.961	1.771
SG-126-39	54	SG-126-39	77	85934	05/29/21	05:08:59	7	329.4	11.346	2.2	2.6	3.5	2665	3210	3797	0.909	1.713
SG-126-39	54	SG-126-39	77	85934	05/29/21	05:08:59	8	389.2	10.86	2.2	2.7	3.6	2559	3081	3654	0.9	1.706
SG-126-39	54	SG-126-39	77	85934	05/29/21	05:08:59	9	448.7	10.408	2.2	2.7	3.5	2460	2962	3505	0.951	1.752
SG-126-39	54	SG-126-39	77	85934	05/29/21	05:08:59	10	508.5	10.013	2.2	2.7	3.5	2364	2846	3374	0.928	1.767
FALSE	55	SG-126-40	63	85935	05/29/21	05:21:36	1	27.2	44.308	1.5	1.8	2.4	2445	2863	3369	-27.275	-33.573
FALSE	55	SG-126-40	63	85935	05/29/21	05:21:36	2	72.9	44.699	1.8	2.1	2.9	2457	2877	3384	-27.348	-33.633
FALSE	55	SG-126-40	63	85935	05/29/21	05:21:36	3	118.7	44.598	1.8	2.2	2.9	2451	2871	3377	-27.35	-33.6
FALSE	55	SG-126-40	63	85935	05/29/21	05:21:36	4	164.5	44.636	1.8	2.2	3	2452	2872	3379	-27.357	-33.635
FALSE	55	SG-126-40	63	85935	05/29/21	05:21:36	5	210	8.755	1.8	2.1	2.8	2056	2474	2930	0.409	-0.285
SG-126-40	55	SG-126-40	63	85935	05/29/21	05:21:36	6	269.6	8.744	1.9	2.3	3.1	2058	2477	2925	0.498	0.014
SG-126-40	55	SG-126-40	63	85935	05/29/21	05:21:36	7	329.4	8.399	2	2.4	3.2	1978	2380	2817	0.561	0.129
SG-126-40	55	SG-126-40	63	85935	05/29/21	05:21:36	8	388.9	8.064	2	2.4	3.3	1901	2289	2709	0.63	0.121
SG-126-40	55	SG-126-40	63	85935	05/29/21	05:21:36	9	448.7	7.742	2	2.4	3.2	1830	2202	2603	0.666	0.189
SG-126-40	55	SG-126-40	63	85935	05/29/21	05:21:36	10	508.5	7.426	2	2.4	3.2	1757	2114	2505	0.639	0.303
FALSE	56	SG-126-41	72	85936	05/29/21	05:34:15	1	27.2	44.405	1.4	1.7	2.4	2451	2870	3377	-27.275	-33.575
FALSE	56	SG-126-41	72	85936	05/29/21	05:34:15	2	72.9	44.714	1.7	2.1	2.8	2457	2877	3385	-27.33	-33.598
FALSE	56	SG-126-41	72	85936	05/29/21	05:34:15	3	118.7	44.655	1.8	2.1	2.9	2453	2873	3380	-27.35	-33.6
FALSE	56	SG-126-41	72	85936	05/29/21	05:34:15	4	164.5	44.619	1.8	2.2	2.9	2451	2871	3377	-27.355	-33.545
FALSE	56	SG-126-41	72	85936	05/29/21	05:34:15	5	209.8	9.562	1.7	2.1	2.9	2233	2690	3182	1.263	-0.032
SG-126-41	56	SG-126-41	72	85936	05/29/21	05:34:15	6	269.6	9.565	2	2.4	3.2	2245	2704	3195	1.34	0.417
SG-126-41	56	SG-126-41	72	85936	05/29/21	05:34:15	7	329.4	9.142	2	2.5	3.3	2150	2590	3063	1.388	0.286
SG-126-41	56	SG-126-41	72	85936	05/29/21	05:34:15	8	389.2	8.77	2.1	2.5	3.3	2064	2487	2944	1.384	0.412
SG-126-41	56	SG-126-41	72	85936	05/29/21	05:34:15	9	448.7	8.419	2.1	2.5	3.3	1988	2395	2829	1.431	0.486
SG-126-41	56	SG-126-41	72	85936	05/29/21	05:34:15	10	508.5	8.081	2	2.5	3.3	1909	2299	2722	1.416	0.436
FALSE	57	naxos-7	145	85937	05/29/21	05:46:53	1	27.2	44.295	1.5	1.7	2.4	2448	2867	3373	-27.249	-33.552
FALSE	57	naxos-7	145	85937	05/29/21	05:46:53	2	72.9	44.614	1.7	2.1	2.7	2454	2874	3381	-27.318	-33.581
FALSE	57	naxos-7	145	85937	05/29/21	05:46:53	3	118.7	44.619	1.8	2.1	2.9	2454	2874	3380	-27.35	-33.6
FALSE	57	naxos-7	145	85937	05/29/21	05:46:53	4	164.5	44.614	1.8	2.2	3	2449	2868	3374	-27.389	-33.64
FALSE	57	naxos-7	145	85937	05/29/21	05:46:53	5	209.8	12.868	1.7	2.1	2.8	3028	3643	4307	-0.034	0.804
naxos-7	57	naxos-7	145	85937	05/29/21	05:46:53	6	269.6	12.894	2.1	2.5	3.4	3035	3652	4323	0.127	1.082
naxos-7	57	naxos-7	145	85937	05/29/21	05:46:53	7	329.4	12.379	2.2	2.7	3.6	2914	3506	4157	0.188	1.226
naxos-7	57	naxos-7	145	85937	05/29/21	05:46:53	8	388.9	11.903	2.3	2.7	3.5	2807	3377	3997	0.146	1.266
naxos-7	57	naxos-7	145	85937	05/29/21	05:46:53	9	448.7	11.458	2.3	2.7	3.6	2701	3250	3851	0.216	1.224
naxos-7	57	naxos-7	145	85937	05/29/21	05:46:53	10	508.3	11.02	2.3	2.7	3.6	2599	3128	3705	0.188	1.207
FALSE	58	SG-126-42	100	85938	05/29/21	05:59:29	1	27.2	44.328	1.5	1.8	2.5	2452	2871	3378	-27.259	-33.56
FALSE	58	SG-126-42	100	85938	05/29/21	05:59:29	2	72.9	44.558	1.8	2.1	2.8	2452	2872	3379	-27.289	-33.6
FALSE	58	SG-126-42	100	85938	05/29/21	05:59:29	3	118.7	44.61	1.8	2.2	2.9	2452	2871	3377	-27.35	-33.6
FALSE	58	SG-126-42	100	85938	05/29/21	05:59:29	4	164.5	44.626	1.8	2.2	3	2453	2872	3379	-27.329	-33.64
FALSE	58	SG-126-42	100	85938	05/29/21	05:59:29	5	209.8	13.395	1.8	2.1	2.9	3150	3794	4480	1.244	0.358
SG-126-42	58	SG-126-42	100	85938	05/29/21	05:59:29	6	269.6	13.528	2.2	2.6	3.4	3185	3836	4535	1.416	0.873
SG-126-42	58	SG-126-42	100	85938	05/29/21	05:59:29	7	329.4	13.031	2.3	2.8	3.6	3064	3690	4371	1.349	0.895
SG-126-42	58	SG-126-42	100	85938	05/29/21	05:59:29	8	388.9	12.522	2.3	2.8	3.7	2952	3556	4203	1.425	0.868
SG-126-42	58	SG-126-42	100	85938	05/29/21	05:59:29	9	448.7	12.07	2.3	2.8	3.7	2847	3429	4055	1.374	0.896
SG-126-42	58	SG-126-42	100	85938	05/29/21	05:59:29	10	508.3	11.581	2.3	2.8	3.7	2732	3291	3896	1.41	0.788
FALSE	59	SG-126-43	85	85939	05/29/21	06:12:05	1	27.2	44.34	1.5	1.8	2.5	2451	2870	3376	-27.285	-33.585
FALSE	59	SG-126-43	85	85939	05/29/21	06:12:05	2	72.9	44.568	1.8	2.1	2.9	2451	2871	3377	-27.324	-33.557
FALSE	59	SG-126-43	85	85939	05/29/21	06:12:05	3	118.7	44.593	1.8	2.2	2.9	2449	2868	3374	-27.35	-33.6
FALSE	59	SG-126-43	85	85939	05/29/21	06:12:05	4	164.5	44.59	1.8	2.2	3	2454	2874	3381	-27.364	-33.578
FALSE	59	SG-126-43	85	85939	05/29/21	06:12:05	5	209.8	12.258	1.8	2.1	2.9	2879	3467	4099	1.093	0.927
SG-126-43	59	SG-126-43	85	85939	05/29/21	06:12:05	6	269.6	12.285	2.1	2.6	3.3	2890	3481	4121	1.196	1.352
SG-126-43	59	SG-126-43	85	85939	05/29/21	06:12:05	7	329.2	11.803	2.2	2.7	3.5	2776	3344	3960	1.218	1.349
SG-126-43	59	SG-126-43	85	85939	05/29/21	06:12:05	8	388.9	11.32	2.2	2.7	3.6	2669	3215	3803	1.221	1.305
SG-126-43	59	SG-126-43	85	85939	05/29/21	06:12:05	9	448.7	10.896	2.2	2.7	3.6	2571	3096	3665	1.31	1.369
SG-126-43	59	SG-126-43	85	85939	05/29/21	06:12:05	10	508.3	10.483	2.2	2.7	3.6	2474	2980	3525	1.284	1.335
FALSE	60	SG-126-44	71	85940	05/29/21	06:24:43	1	27.2	44.495	1.5	1.8	2.4	2461	2883	3391	-27.263	-33.578
FALSE	60	SG-126-44	71	85940	05/29/21	06:24:43	2	72.9	44.692	1.8	2.1	2.9	2456	2876	3383	-27.323	-33.627
FALSE	60	SG-126-44	71	85940	05/29/21	06:24:43	3	118.7	44.661	1.8	2.2	2.9	2454	2874	3381	-27.35	-33.6
FALSE	60	SG-126-44	71	85940	05/29/21	06:24:43	4	164.5	44.664	1.8	2.2	2.9	2449	2868	3373	-27.343	-33.614
FALSE	60	SG-126-44	71	85940	05/29/21	06:24:43	5	209.8	10.994	1.8	2.1	2.9	2590	3116	3683	-0.056	0.446
SG-126-44	60	SG-126-44	71	85940	05/29/21	06:24:43	6	269.6	11.027	2	2.5	3.3	2600	3128	3703	0.147	0.831
SG-126-44	60	SG-126-44	71	85940	05/29/21	06:24:43	7	329.4	10.592	2.1	2.6	3.5	2496	3003	3557	0.149	0.808
SG-126-44	60	SG-126-44	71	85940	05/29/21	06:24:43	8	388.9	10.166	2.2	2.6	3.5	2398	2885	3415	0.077	0.935
SG-126-44	60	SG-126-44	71	85940	05/29/21	06:24:43	9	448.7	9.792	2.2	2.6	3.5	2311	2780	3293	0.136	0.886
SG-126-44	60	SG-126-44	71	85940	05/29/21	06:24:43	10	508.3	9.42	2.1	2.6	3.4	2224	2675	3167	0.194	0.999
FALSE	61	SG-126-45	87	85941	05/29/21	06:37:20	1	27.2	44.269	1.5	1.7	2.4	2450	2868	3374	-27.267	-33.505
FALSE	61	SG-126-45	87	85941	05/29/21	06:37:20	2	72.9	44.59	1.7	2.1	2.9	2450	2869	3376	-27.329	-33.592
FALSE	61	SG-126-45	87	85941	05/29/21	06:37:20	3	118.7	44.779	1.8	2.2	2.9	2460	2880	3388	-27.35	-33.6
FALSE	61	SG-126-45	87	85941	05/29/21	06:37:20	4	164.5	44.657	1.8	2.2	2.9	2453	2873	3379	-27.37	-33.596
FALSE	61	SG-126-45	87	85941	05/29/21	06:37:20	5	209.8	15.129	1.7	2.1	2.8	3559	4280	5059	-0.42	0.234
SG-126-45	61	SG-126-45	87	85941	05/29/21	06:37:20	6	269.6	15.137	2.2	2.6	3.4	3564	4286	5075	-0.253	0.656
SG-126-45	61	SG-126-45	87	85941	05/29/21	06:37:20	7	329.4	14.558	2.3	2.8	3.7	3424	4117	4879	-0.246	0.664
SG-126-45	61	SG-126-45	87	85941	05/29/21	06:37:20	8	388.9	13.984	2.4	2.9	3.7	3293	3961	4694	-0.281	0.737
SG-126-45	61	SG-126-45	87	85941	05/29/21	06:37:20	9	448.7	13.464	2.4	2.9	3.8	3173	3815	4516	-0.283	0.626
SG-126-45	61	SG-126-45	87	85941	05/29/21	06:37:20	10	508.5	12.986	2.4	2.9	3.8	3061	3682	4366	-0.279	0.617
FALSE	62	SG-126-46	109	85942	05/29/21	06:49:57	1	27.2	44.402	1.5	1.8	2.4	2453	2873	3380	-27.259	-33.573
FALSE	62	SG-126-46	109	85942	05/29/21	06:49:57	2	72.9	44.639	1.7	2.1	2.8	2453	2873	3380	-27.344	-33.605
FALSE	62	SG-126-46	109	85942	05/29/21	06:49:57	3	118.7	44.626	1.8	2.2	2.9	2454	2873	3379	-27.35	-33.6
FALSE	62	SG-126-46	109	85942	05/29/21	06:49:57	4	164.5	44.618	1.8	2.2	3	2452	2872	3378	-27.362	-33.608
FALSE	62	SG-126-46	109	85942	05/29/21	06:49:57	5	209.8	9.912	1.7	2.1	2.8	2334	2809	3324	0.337	0.305
SG-126-46	62	SG-126-46	109	85942	05/29/21	06:49:57	6	269.6	9.898	2	2.4	3.2	2333	2807	3318	0.438	0.709
SG-126-46	62	SG-126-46	109	85942	05/29/21	06:49:57	7	329.4	9.509	2	2.5	3.3	2242	2698	3192	0.409	0.649
SG-126-46	62	SG-126-46	109	85942	05/29/21	06:49:57	8	388.9	9.138	2	2.5	3.3	2154	2593	3072	0.525	0.672
SG-126-46	62	SG-126-46	109	85942	05/29/21	06:49:57	9	448.7	8.796	2	2.5	3.3	2077	2499	2955	0.457	0.75
SG-126-46	62	SG-126-46	109	85942	05/29/21	06:49:57	10	508.5	8.468	2	2.4	3.3	2000	2406	2850	0.536	0.749
FALSE	63	SG-126-47	83	85943	05/29/21	07:02:34	1	27.2	44.361	1.4	1.7	2.3	2454	2874	3381	-27.295	-33.537
FALSE	63	SG-126-47	83	85943	05/29/21	07:02:34	2	72.9	44.585	1.7	2	2.8	2450	2870	3375	-27.368	-33.605
FALSE	63	SG-126-47	83	85943	05/29/21	07:02:34	3	118.7	44.698	1.7	2.1	2.9	2453	2872	3378	-27.35	-33.6
FALSE	63	SG-126-47	83	85943	05/29/21	07:02:34	4	164.5	44.604	1.8	2.1	2.9	2452	2871	3378	-27.374	-33.572
FALSE	63	SG-126-47	83	85943	05/29/21	07:02:34	5	209.8	10.349	1.7	2	2.7	2430	2925	3457	0.628	0.322
SG-126-47	63	SG-126-47	83	85943	05/29/21	07:02:34	6	269.6	10.339	1.9	2.4	3.1	2433	2929	3464	0.739	0.75
SG-126-47	63	SG-126-47	83	85943	05/29/21	07:02:34	7	329.4	9.925	2	2.4	3.3	2336	2811	3330	0.746	0.783
SG-126-47	63	SG-126-47	83	85943	05/29/21	07:02:34	8	388.9	9.535	2	2.5	3.3	2248	2706	3203	0.716	0.737
SG-126-47	63	SG-126-47	83	85943	05/29/21	07:02:34	9	448.7	9.145	2	2.4	3.3	2161	2601	3073	0.758	0.726
SG-126-47	63	SG-126-47	83	85943	05/29/21	07:02:34	10	508.5	8.78	2	2.4	3.2	2075	2498	2959	0.757	0.905
FALSE	64	SG-126-48	67	85944	05/29/21	07:15:32	1	27.2	44.541	1.5	1.8	2.5	2457	2876	3384	-27.293	-33.554
FALSE	64	SG-126-48	67	85944	05/29/21	07:15:32	2	72.9	44.733	1.7	2.1	2.9	2454	2872	3378	-27.317	-33.576
FALSE	64	SG-126-48	67	85944	05/29/21	07:15:32	3	118.7	44.79	1.8	2.1	2.9	2462	2881	3389	-27.35	-33.6
FALSE	64	SG-126-48	67	85944	05/29/21	07:15:32	4	164.5	44.785	1.8	2.1	2.9	2464	2884	3393	-27.333	-33.559
FALSE	64	SG-126-48	67	85944	05/29/21	07:15:32	5	209.8	8.774	1.7	2	2.8	2061	2479	2937	0.376	0.486
SG-126-48	64	SG-126-48	67	85944	05/29/21	07:15:32	6	269.6	8.774	1.9	2.2	3	2067	2487	2940	0.579	0.903
SG-126-48	64	SG-126-48	67	85944	05/29/21	07:15:32	7	329.4	8.423	1.9	2.3	3.1	1989	2392	2829	0.609	0.868
SG-126-48	64	SG-126-48	67	85944	05/29/21	07:15:32	8	389.2	8.074	1.9	2.3	3.1	1908	2295	2719	0.57	0.928
SG-126-48	64	SG-126-48	67	85944	05/29/21	07:15:32	9	448.7	7.779	1.9	2.3	3.1	1840	2214	2616	0.708	0.974
SG-126-48	64	SG-126-48	67	85944	05/29/21	07:15:32	10	508.5	7.484	1.9	2.3	3.1	1770	2128	2519	0.637	1.032
FALSE	65	Kiel Carbo c	113	85945	05/29/21	07:28:10	1	27.2	44.429	1.3	1.6	2.2	2456	2876	3384	-27.281	-33.58
FALSE	65	Kiel Carbo c	113	85945	05/29/21	07:28:10	2	72.9	44.691	1.6	1.9	2.7	2458	2878	3385	-27.325	-33.584
FALSE	65	Kiel Carbo c	113	85945	05/29/21	07:28:10	3	118.7	44.636	1.7	2	2.8	2452	2871	3379	-27.35	-33.6
FALSE	65	Kiel Carbo c	113	85945	05/29/21	07:28:10	4	164.5	44.64	1.7	2.1	2.8	2457	2877	3385	-27.392	-33.614
FALSE	65	Kiel Carbo c	113	85945	05/29/21	07:28:10	5	209.8	18.359	1.6	2	2.7	4297	4999	6021	-34.911	-16.841
Kiel Carbo c	65	Kiel Carbo c	113	85945	05/29/21	07:28:10	6	269.6	18.385	2.2	2.7	3.6	4320	5025	6038	-34.793	-16.49
Kiel Carbo c	65	Kiel Carbo c	113	85945	05/29/21	07:28:10	7	329.4	17.647	2.4	2.9	3.8	4158	4836	5819	-34.873	-16.49
Kiel Carbo c	65	Kiel Carbo c	113	85945	05/29/21	07:28:10	8	389.2	16.929	2.5	3	3.9	3992	4642	5594	-34.925	-16.486
Kiel Carbo c	65	Kiel Carbo c	113	85945	05/29/21	07:28:10	9	448.7	16.291	2.5	3	4	3847	4475	5377	-34.897	-16.532
Kiel Carbo c	65	Kiel Carbo c	113	85945	05/29/21	07:28:10	10	508.5	15.682	2.5	2.9	3.9	3704	4308	5184	-34.825	-16.459
FALSE	66	naxos-8	78	85946	05/29/21	07:40:47	1	27.2	44.486	1.4	1.7	2.4	2460	2880	3389	-27.253	-33.586
FALSE	66	naxos-8	78	85946	05/29/21	07:40:47	2	72.9	44.747	1.7	2.1	2.9	2463	2883	3392	-27.338	-33.655
FALSE	66	naxos-8	78	85946	05/29/21	07:40:47	3	118.7	44.785	1.7	2.1	2.9	2467	2889	3399	-27.35	-33.6
FALSE	66	naxos-8	78	85946	05/29/21	07:40:47	4	164.5	44.772	1.8	2.1	2.9	2460	2880	3388	-27.375	-33.634
FALSE	66	naxos-8	78	85946	05/29/21	07:40:47	5	210	14.334	1.7	2	2.8	3350	4034	4731	1.85	-7.874
naxos-8	66	naxos-8	78	85946	05/29/21	07:40:47	6	269.6	14.331	2.1	2.5	3.3	3359	4048	4751	2.236	-7.383
naxos-8	66	naxos-8	78	85946	05/29/21	07:40:47	7	329.4	13.744	2.2	2.7	3.6	3232	3895	4561	2.177	-7.464
naxos-8	66	naxos-8	78	85946	05/29/21	07:40:47	8	389.2	13.178	2.3	2.7	3.6	3109	3746	4394	2.178	-7.46
naxos-8	66	naxos-8	78	85946	05/29/21	07:40:47	9	448.7	12.678	2.3	2.8	3.7	2989	3603	4224	2.201	-7.56
naxos-8	66	naxos-8	78	85946	05/29/21	07:40:47	10	508.5	12.212	2.2	2.8	3.7	2881	3471	4067	2.161	-7.525
FALSE	67	SG-126-49	76	85947	05/29/21	07:53:25	1	27.2	44.444	1.4	1.7	2.4	2458	2879	3386	-27.303	-33.573
FALSE	67	SG-126-49	76	85947	05/29/21	07:53:25	2	72.9	44.707	1.7	2	2.7	2458	2878	3386	-27.362	-33.554
FALSE	67	SG-126-49	76	85947	05/29/21	07:53:25	3	118.7	44.724	1.7	2.1	2.9	2456	2876	3383	-27.35	-33.6
FALSE	67	SG-126-49	76	85947	05/29/21	07:53:25	4	164.5	44.777	1.7	2.1	2.9	2454	2873	3381	-27.384	-33.597
FALSE	67	SG-126-49	76	85947	05/29/21	07:53:25	5	210	9.12	1.7	2	2.8	2135	2567	3039	-0.225	0.072
SG-126-49	67	SG-126-49	76	85947	05/29/21	07:53:25	6	269.6	9.093	1.9	2.2	3	2137	2570	3047	-0.118	0.635
SG-126-49	67	SG-126-49	76	85947	05/29/21	07:53:25	7	329.4	8.725	1.9	2.3	3.1	2055	2471	2922	-0.069	0.559
SG-126-49	67	SG-126-49	76	85947	05/29/21	07:53:25	8	389.2	8.368	1.9	2.4	3.2	1974	2374	2810	-0.109	0.555
SG-126-49	67	SG-126-49	76	85947	05/29/21	07:53:25	9	448.7	8.032	1.9	2.3	3.1	1894	2278	2699	-0.099	0.662
SG-126-49	67	SG-126-49	76	85947	05/29/21	07:53:25	10	508.5	7.722	1.9	2.3	3.1	1822	2192	2594	-0.09	0.72
FALSE	68	SG-126-50	52	85948	05/29/21	08:06:01	1	27.2	44.402	1.3	1.6	2.3	2461	2881	3389	-27.282	-33.592
FALSE	68	SG-126-50	52	85948	05/29/21	08:06:01	2	72.9	44.758	1.6	2	2.7	2459	2880	3388	-27.353	-33.58
FALSE	68	SG-126-50	52	85948	05/29/21	08:06:01	3	118.7	44.711	1.7	2	2.8	2456	2876	3383	-27.35	-33.6
FALSE	68	SG-126-50	52	85948	05/29/21	08:06:01	4	164.5	44.763	1.7	2.1	2.8	2454	2873	3380	-27.406	-33.613
FALSE	68	SG-126-50	52	85948	05/29/21	08:06:01	5	210	7.006	1.6	1.9	2.7	1642	1976	2335	0.625	-0.494
SG-126-50	68	SG-126-50	52	85948	05/29/21	08:06:01	6	269.6	6.98	1.7	2.1	2.9	1642	1976	2338	0.748	-0.152
SG-126-50	68	SG-126-50	52	85948	05/29/21	08:06:01	7	329.4	6.7	1.8	2.1	2.9	1580	1901	2246	0.817	0.014
SG-126-50	68	SG-126-50	52	85948	05/29/21	08:06:01	8	389.2	6.415	1.8	2.2	3	1516	1825	2158	0.777	-0.057
SG-126-50	68	SG-126-50	52	85948	05/29/21	08:06:01	9	448.7	6.168	1.8	2.1	3	1456	1753	2073	0.784	-0.155
SG-126-50	68	SG-126-50	52	85948	05/29/21	08:06:01	10	508.5	5.927	1.8	2.1	3	1401	1685	1993	0.874	-0.101
FALSE	69	SG-126-51	61	85949	05/29/21	08:18:40	1	27.2	44.46	1.3	1.6	2.2	2460	2881	3389	-27.274	-33.604
FALSE	69	SG-126-51	61	85949	05/29/21	08:18:40	2	72.9	44.721	1.6	2	2.6	2455	2875	3383	-27.344	-33.62
FALSE	69	SG-126-51	61	85949	05/29/21	08:18:40	3	118.7	44.728	1.6	2	2.7	2458	2878	3386	-27.35	-33.6
FALSE	69	SG-126-51	61	85949	05/29/21	08:18:40	4	164.5	44.72	1.7	2	2.8	2453	2873	3379	-27.323	-33.622
FALSE	69	SG-126-51	61	85949	05/29/21	08:18:40	5	210	7.764	1.6	1.9	2.7	1824	2193	2594	0.189	-0.795
SG-126-51	69	SG-126-51	61	85949	05/29/21	08:18:40	6	269.6	7.758	1.8	2.2	2.9	1826	2198	2601	0.386	-0.391
SG-126-51	69	SG-126-51	61	85949	05/29/21	08:18:40	7	329.4	7.443	1.8	2.2	3	1755	2112	2494	0.398	-0.339
SG-126-51	69	SG-126-51	61	85949	05/29/21	08:18:40	8	389.2	7.149	1.8	2.2	3	1689	2032	2403	0.472	-0.377
SG-126-51	69	SG-126-51	61	85949	05/29/21	08:18:40	9	448.7	6.869	1.8	2.2	3	1621	1950	2308	0.491	-0.274
SG-126-51	69	SG-126-51	61	85949	05/29/21	08:18:40	10	508.5	6.611	1.8	2.2	3	1562	1879	2221	0.448	-0.358
FALSE	70	SG-126-52	59	85950	05/29/21	08:31:17	1	27.2	44.478	1.3	1.6	2.3	2460	2880	3388	-27.31	-33.58
FALSE	70	SG-126-52	59	85950	05/29/21	08:31:17	2	72.9	44.706	1.6	1.9	2.6	2456	2875	3383	-27.35	-33.62
FALSE	70	SG-126-52	59	85950	05/29/21	08:31:17	3	118.7	44.747	1.6	2	2.7	2459	2880	3387	-27.35	-33.6
FALSE	70	SG-126-52	59	85950	05/29/21	08:31:17	4	164.5	44.7	1.7	2.1	2.8	2460	2881	3389	-27.378	-33.585
FALSE	70	SG-126-52	59	85950	05/29/21	08:31:17	5	210	8.261	1.6	1.9	2.6	1940	2334	2762	0.291	0.509
SG-126-52	70	SG-126-52	59	85950	05/29/21	08:31:17	6	269.6	8.242	1.8	2.2	3	1939	2334	2764	0.427	0.755
SG-126-52	70	SG-126-52	59	85950	05/29/21	08:31:17	7	329.4	7.9	1.8	2.2	3	1864	2243	2652	0.486	0.904
SG-126-52	70	SG-126-52	59	85950	05/29/21	08:31:17	8	389.2	7.571	1.8	2.2	3	1790	2154	2549	0.53	0.913
SG-126-52	70	SG-126-52	59	85950	05/29/21	08:31:17	9	448.7	7.276	1.8	2.2	3	1716	2065	2448	0.454	1.02
SG-126-52	70	SG-126-52	59	85950	05/29/21	08:31:17	10	508.5	7.006	1.8	2.2	3	1653	1990	2353	0.519	0.988
FALSE	71	SG-126-53	87	85951	05/29/21	08:43:59	1	27.2	44.428	1.3	1.6	2.2	2456	2877	3384	-27.299	-33.577
FALSE	71	SG-126-53	87	85951	05/29/21	08:43:59	2	72.9	44.686	1.6	1.9	2.7	2458	2878	3385	-27.336	-33.625
FALSE	71	SG-126-53	87	85951	05/29/21	08:43:59	3	118.7	44.694	1.6	2	2.7	2455	2876	3383	-27.35	-33.6
FALSE	71	SG-126-53	87	85951	05/29/21	08:43:59	4	164.5	44.728	1.7	2.1	2.8	2458	2878	3386	-27.404	-33.604
FALSE	71	SG-126-53	87	85951	05/29/21	08:43:59	5	210	9.612	1.6	1.9	2.7	2249	2702	3200	-1.24	-0.07
SG-126-53	71	SG-126-53	87	85951	05/29/21	08:43:59	6	269.8	9.608	1.8	2.2	3	2253	2707	3212	-1.097	0.474
SG-126-53	71	SG-126-53	87	85951	05/29/21	08:43:59	7	329.4	9.192	1.9	2.3	3.2	2161	2597	3075	-1.142	0.402
SG-126-53	71	SG-126-53	87	85951	05/29/21	08:43:59	8	389.2	8.815	1.9	2.3	3.2	2078	2498	2957	-1.142	0.266
SG-126-53	71	SG-126-53	87	85951	05/29/21	08:43:59	9	448.9	8.466	1.9	2.3	3.2	1993	2394	2841	-1.17	0.332
SG-126-53	71	SG-126-53	87	85951	05/29/21	08:43:59	10	508.5	8.134	1.9	2.3	3.1	1918	2304	2728	-1.102	0.453
FALSE	72	SG-126-54	81	85952	05/29/21	08:56:36	1	27.2	44.412	1.3	1.6	2.2	2454	2874	3380	-27.301	-33.556
FALSE	72	SG-126-54	81	85952	05/29/21	08:56:36	2	72.9	44.641	1.6	1.9	2.7	2449	2868	3374	-27.355	-33.628
FALSE	72	SG-126-54	81	85952	05/29/21	08:56:36	3	118.7	44.692	1.7	2	2.7	2458	2878	3385	-27.35	-33.6
FALSE	72	SG-126-54	81	85952	05/29/21	08:56:36	4	164.5	44.682	1.7	2.1	2.8	2457	2876	3384	-27.388	-33.598
FALSE	72	SG-126-54	81	85952	05/29/21	08:56:36	5	210	11.905	1.6	1.9	2.7	2775	3336	3948	-0.208	-0.084
SG-126-54	72	SG-126-54	81	85952	05/29/21	08:56:36	6	269.8	11.885	2	2.4	3.2	2782	3346	3966	-0.127	0.356
SG-126-54	72	SG-126-54	81	85952	05/29/21	08:56:36	7	329.4	11.377	2	2.5	3.4	2671	3213	3807	-0.216	0.249
SG-126-54	72	SG-126-54	81	85952	05/29/21	08:56:36	8	389.2	10.921	2.1	2.6	3.5	2575	3096	3664	-0.285	0.171
SG-126-54	72	SG-126-54	81	85952	05/29/21	08:56:36	9	448.7	10.489	2.1	2.5	3.5	2472	2973	3520	-0.187	0.176
SG-126-54	72	SG-126-54	81	85952	05/29/21	08:56:36	10	508.5	10.092	2.1	2.5	3.4	2380	2862	3386	-0.194	0.263
FALSE	73	SG-126-55	94	85953	05/29/21	09:09:12	1	27.2	44.493	1.4	1.7	2.4	2458	2878	3385	-27.275	-33.594
FALSE	73	SG-126-55	94	85953	05/29/21	09:09:12	2	72.9	44.784	1.6	2	2.8	2460	2881	3389	-27.33	-33.605
FALSE	73	SG-126-55	94	85953	05/29/21	09:09:12	3	118.7	44.843	1.7	2	2.8	2463	2884	3393	-27.35	-33.6
FALSE	73	SG-126-55	94	85953	05/29/21	09:09:12	4	164.5	44.811	1.7	2.1	2.9	2461	2882	3391	-27.359	-33.605
FALSE	73	SG-126-55	94	85953	05/29/21	09:09:12	5	210	7.196	1.7	2	2.8	1693	2033	2408	-1.67	-0.366
SG-126-55	73	SG-126-55	94	85953	05/29/21	09:09:12	6	269.8	7.191	1.8	2.2	3.1	1691	2031	2410	-1.448	-0.071
SG-126-55	73	SG-126-55	94	85953	05/29/21	09:09:12	7	329.4	6.891	1.8	2.2	3.1	1626	1952	2310	-1.481	-0.075
SG-126-55	73	SG-126-55	94	85953	05/29/21	09:09:12	8	389.2	6.631	1.8	2.2	3.1	1567	1882	2230	-1.603	0.087
SG-126-55	73	SG-126-55	94	85953	05/29/21	09:09:12	9	448.7	6.377	1.8	2.2	3.1	1506	1809	2145	-1.508	-0.023
SG-126-55	73	SG-126-55	94	85953	05/29/21	09:09:12	10	508.5	6.15	1.8	2.2	3.1	1453	1745	2067	-1.494	-0.014
FALSE	74	SG-126-9-2	94	85954	05/29/21	09:21:50	1	27.2	44.604	1.3	1.6	2.3	2464	2885	3393	-27.29	-33.607
FALSE	74	SG-126-9-2	94	85954	05/29/21	09:21:50	2	72.9	44.804	1.6	2	2.7	2462	2883	3391	-27.342	-33.617
FALSE	74	SG-126-9-2	94	85954	05/29/21	09:21:50	3	118.7	44.809	1.7	2	2.8	2465	2885	3395	-27.35	-33.6
FALSE	74	SG-126-9-2	94	85954	05/29/21	09:21:50	4	164.5	44.772	1.7	2.1	2.8	2461	2882	3391	-27.356	-33.568
FALSE	74	SG-126-9-2	94	85954	05/29/21	09:21:50	5	210	12.652	1.7	2	2.9	2972	3575	4234	-0.005	1.436
SG-126-9-2	74	SG-126-9-2	94	85954	05/29/21	09:21:50	6	269.8	12.657	2	2.5	3.6	2968	3570	4235	0.144	1.841
SG-126-9-2	74	SG-126-9-2	94	85954	05/29/21	09:21:50	7	329.4	12.176	2.2	2.6	3.8	2861	3443	4080	0.136	1.805
SG-126-9-2	74	SG-126-9-2	94	85954	05/29/21	09:21:50	8	389.2	11.71	2.2	2.7	3.8	2758	3317	3929	0.112	1.846
SG-126-9-2	74	SG-126-9-2	94	85954	05/29/21	09:21:50	9	448.9	11.275	2.2	2.7	3.8	2655	3193	3791	0.188	1.945
SG-126-9-2	74	SG-126-9-2	94	85954	05/29/21	09:21:50	10	508.5	10.861	2.2	2.7	3.9	2558	3078	3642	0.122	1.903
FALSE	75	naxos-9	66	85955	05/29/21	09:34:28	1	27.2	44.483	1.4	1.7	2.5	2456	2876	3383	-27.275	-33.559
FALSE	75	naxos-9	66	85955	05/29/21	09:34:28	2	72.9	44.797	1.7	2	2.9	2457	2877	3385	-27.327	-33.56
FALSE	75	naxos-9	66	85955	05/29/21	09:34:28	3	118.7	44.756	1.7	2.1	3	2458	2878	3386	-27.35	-33.6
FALSE	75	naxos-9	66	85955	05/29/21	09:34:28	4	164.5	44.743	1.7	2.1	3	2460	2881	3389	-27.332	-33.58
FALSE	75	naxos-9	66	85955	05/29/21	09:34:28	5	210	9.78	1.6	2	2.9	2290	2758	3231	2.103	-7.739
naxos-9	75	naxos-9	66	85955	05/29/21	09:34:28	6	269.8	9.778	1.9	2.3	3.3	2291	2761	3239	2.362	-7.39
naxos-9	75	naxos-9	66	85955	05/29/21	09:34:28	7	329.4	9.369	2	2.4	3.3	2201	2653	3109	2.334	-7.2
naxos-9	75	naxos-9	66	85955	05/29/21	09:34:28	8	389.2	8.983	2	2.4	3.4	2119	2553	2991	2.381	-7.454
naxos-9	75	naxos-9	66	85955	05/29/21	09:34:28	9	448.7	8.624	2	2.4	3.4	2033	2450	2876	2.424	-7.325
naxos-9	75	naxos-9	66	85955	05/29/21	09:34:28	10	508.5	8.293	2	2.4	3.3	1959	2361	2764	2.407	-7.351
FALSE	76	SG-126-19-2	82	85956	05/29/21	09:47:05	1	27.2	44.458	1.3	1.6	2.4	2459	2880	3388	-27.287	-33.579
FALSE	76	SG-126-19-2	82	85956	05/29/21	09:47:05	2	72.9	44.732	1.6	2	2.8	2460	2881	3389	-27.328	-33.571
FALSE	76	SG-126-19-2	82	85956	05/29/21	09:47:05	3	118.7	44.775	1.7	2	2.9	2463	2884	3392	-27.35	-33.6
FALSE	76	SG-126-19-2	82	85956	05/29/21	09:47:05	4	164.5	44.688	1.7	2.1	3	2450	2869	3375	-27.376	-33.634
FALSE	76	SG-126-19-2	82	85956	05/29/21	09:47:05	5	210	9.755	1.6	1.9	2.8	2281	2744	3243	0.428	-0.04
SG-126-19-2	76	SG-126-19-2	82	85956	05/29/21	09:47:05	6	269.8	9.744	1.9	2.3	3.2	2281	2745	3251	0.465	0.26
SG-126-19-2	76	SG-126-19-2	82	85956	05/29/21	09:47:05	7	329.4	9.328	1.9	2.4	3.3	2192	2639	3119	0.519	0.351
SG-126-19-2	76	SG-126-19-2	82	85956	05/29/21	09:47:05	8	389.2	8.931	2	2.4	3.3	2108	2536	3001	0.517	0.328
SG-126-19-2	76	SG-126-19-2	82	85956	05/29/21	09:47:05	9	448.7	8.579	2	2.4	3.3	2023	2435	2884	0.538	0.474
SG-126-19-2	76	SG-126-19-2	82	85956	05/29/21	09:47:05	10	508.5	8.245	2	2.4	3.3	1948	2344	2772	0.577	0.396
FALSE	77	SG-126-28-2	96	85957	05/29/21	09:59:40	1	27.2	44.393	1.3	1.6	2.4	2456	2876	3383	-27.272	-33.524
FALSE	77	SG-126-28-2	96	85957	05/29/21	09:59:40	2	72.9	44.642	1.6	2	2.8	2455	2875	3382	-27.341	-33.586
FALSE	77	SG-126-28-2	96	85957	05/29/21	09:59:40	3	118.7	44.709	1.7	2.1	2.9	2456	2876	3384	-27.35	-33.6
FALSE	77	SG-126-28-2	96	85957	05/29/21	09:59:40	4	164.5	44.669	1.7	2.1	2.9	2453	2872	3379	-27.337	-33.579
FALSE	77	SG-126-28-2	96	85957	05/29/21	09:59:40	5	210	16.605	1.6	2	2.8	3871	4661	5506	1.093	-0.543
SG-126-28-2	77	SG-126-28-2	96	85957	05/29/21	09:59:40	6	269.6	16.589	2.2	2.6	3.6	3878	4670	5521	1.219	-0.13
SG-126-28-2	77	SG-126-28-2	96	85957	05/29/21	09:59:40	7	329.4	15.883	2.3	2.8	3.8	3725	4485	5295	1.235	-0.119
SG-126-28-2	77	SG-126-28-2	96	85957	05/29/21	09:59:40	8	389.2	15.214	2.4	2.9	3.9	3577	4306	5093	1.223	-0.147
SG-126-28-2	77	SG-126-28-2	96	85957	05/29/21	09:59:40	9	448.7	14.594	2.4	2.9	3.9	3438	4141	4892	1.18	-0.103
SG-126-28-2	77	SG-126-28-2	96	85957	05/29/21	09:59:40	10	508.5	14.014	2.4	2.9	4	3305	3980	4705	1.234	-0.088
FALSE	78	SG-126-39-2	72	85958	05/29/21	10:12:17	1	27.2	44.333	1.4	1.7	2.5	2452	2871	3378	-27.24	-33.607
FALSE	78	SG-126-39-2	72	85958	05/29/21	10:12:17	2	72.9	44.577	1.7	2.1	2.9	2453	2872	3378	-27.307	-33.619
FALSE	78	SG-126-39-2	72	85958	05/29/21	10:12:17	3	118.7	44.584	1.7	2.1	2.9	2451	2870	3376	-27.35	-33.6
FALSE	78	SG-126-39-2	72	85958	05/29/21	10:12:17	4	164.5	44.588	1.7	2.1	3	2452	2870	3377	-27.36	-33.608
FALSE	78	SG-126-39-2	72	85958	05/29/21	10:12:17	5	209.8	8.986	1.7	2.1	3.2	2117	2548	3020	0.36	0.938
SG-126-39-2	78	SG-126-39-2	72	85958	05/29/21	10:12:17	6	269.6	8.929	2	2.4	3.6	2102	2529	2992	0.565	1.233
SG-126-39-2	78	SG-126-39-2	72	85958	05/29/21	10:12:17	7	329.4	8.605	2	2.5	3.8	2025	2436	2884	0.489	1.323
SG-126-39-2	78	SG-126-39-2	72	85958	05/29/21	10:12:17	8	389.2	8.268	2	2.5	3.8	1945	2340	2774	0.543	1.339
SG-126-39-2	78	SG-126-39-2	72	85958	05/29/21	10:12:17	9	448.7	7.945	2	2.5	3.9	1873	2254	2665	0.562	1.357
SG-126-39-2	78	SG-126-39-2	72	85958	05/29/21	10:12:17	10	508.5	7.648	2	2.5	3.9	1802	2168	2570	0.555	1.427
FALSE	79	SG-126-49-2	85	85959	05/29/21	10:24:53	1	27.2	44.264	1.4	1.7	2.7	2446	2864	3369	-27.279	-33.613
FALSE	79	SG-126-49-2	85	85959	05/29/21	10:24:53	2	72.9	44.625	1.6	2	3	2451	2870	3376	-27.324	-33.616
FALSE	79	SG-126-49-2	85	85959	05/29/21	10:24:53	3	118.7	44.562	1.7	2.1	3.1	2449	2867	3373	-27.35	-33.6
FALSE	79	SG-126-49-2	85	85959	05/29/21	10:24:53	4	164.5	44.552	1.7	2.1	3.1	2448	2866	3373	-27.366	-33.628
FALSE	79	SG-126-49-2	85	85959	05/29/21	10:24:53	5	210	11.087	1.6	2	3	2581	3105	3680	-0.073	0.254
SG-126-49-2	79	SG-126-49-2	85	85959	05/29/21	10:24:53	6	269.6	11.091	1.9	2.3	3.4	2598	3124	3695	0.162	0.582
SG-126-49-2	79	SG-126-49-2	85	85959	05/29/21	10:24:53	7	329.4	10.576	2	2.4	3.6	2486	2990	3541	0.184	0.65
SG-126-49-2	79	SG-126-49-2	85	85959	05/29/21	10:24:53	8	388.9	10.127	2	2.5	3.6	2386	2870	3398	0.14	0.533
SG-126-49-2	79	SG-126-49-2	85	85959	05/29/21	10:24:53	9	448.7	9.727	2	2.5	3.5	2294	2760	3265	0.11	0.747
SG-126-49-2	79	SG-126-49-2	85	85959	05/29/21	10:24:53	10	508.5	9.319	2	2.5	3.5	2200	2646	3137	0.118	0.687
FALSE	80	SG-127-1	64	85960	05/29/21	10:37:21	1	27.2	44.18	1.4	1.7	2.6	2440	2857	3361	-27.203	-33.493
FALSE	80	SG-127-1	64	85960	05/29/21	10:37:21	2	72.9	44.374	1.6	2	3	2441	2858	3362	-27.241	-33.558
FALSE	80	SG-127-1	64	85960	05/29/21	10:37:21	3	118.7	44.467	1.7	2.1	3	2443	2861	3365	-27.35	-33.6
FALSE	80	SG-127-1	64	85960	05/29/21	10:37:21	4	164.5	44.474	1.7	2.1	3.1	2444	2862	3367	-27.342	-33.599
FALSE	80	SG-127-1	64	85960	05/29/21	10:37:21	5	209.8	9.224	1.7	2	3	2170	2613	3088	1.271	0.219
SG-127-1	80	SG-127-1	64	85960	05/29/21	10:37:21	6	269.6	9.204	1.9	2.3	3.3	2167	2610	3089	1.465	0.614
SG-127-1	80	SG-127-1	64	85960	05/29/21	10:37:21	7	329.2	8.869	1.9	2.3	3.4	2090	2517	2975	1.448	0.491
SG-127-1	80	SG-127-1	64	85960	05/29/21	10:37:21	8	388.9	8.506	1.9	2.4	3.5	2010	2420	2859	1.414	0.525
SG-127-1	80	SG-127-1	64	85960	05/29/21	10:37:21	9	448.7	8.188	1.9	2.4	3.5	1932	2326	2753	1.535	0.615
SG-127-1	80	SG-127-1	64	85960	05/29/21	10:37:21	10	508.3	7.869	1.9	2.4	3.4	1862	2241	2649	1.453	0.688
FALSE	81	SG-127-2	55	85961	05/29/21	10:49:59	1	27.2	44.139	1.3	1.7	2.5	2444	2862	3367	-27.272	-33.579
FALSE	81	SG-127-2	55	85961	05/29/21	10:49:59	2	72.9	44.459	1.6	2	3	2443	2860	3365	-27.316	-33.6
FALSE	81	SG-127-2	55	85961	05/29/21	10:49:59	3	118.7	44.441	1.7	2	3	2441	2858	3362	-27.35	-33.6
FALSE	81	SG-127-2	55	85961	05/29/21	10:49:59	4	164.5	44.49	1.7	2.1	3	2446	2864	3368	-27.355	-33.599
FALSE	81	SG-127-2	55	85961	05/29/21	10:49:59	5	209.8	7.335	1.6	2	3	1731	2082	2464	0.634	-0.377
SG-127-2	81	SG-127-2	55	85961	05/29/21	10:49:59	6	269.4	7.334	1.8	2.2	3.2	1732	2084	2464	0.789	0.003
SG-127-2	81	SG-127-2	55	85961	05/29/21	10:49:59	7	329.2	7.036	1.8	2.2	3.2	1664	2003	2367	0.725	0.182
SG-127-2	81	SG-127-2	55	85961	05/29/21	10:49:59	8	388.9	6.758	1.8	2.2	3.2	1599	1924	2277	0.845	0.157
SG-127-2	81	SG-127-2	55	85961	05/29/21	10:49:59	9	448.5	6.492	1.8	2.2	3.2	1538	1851	2186	0.861	0.242
SG-127-2	81	SG-127-2	55	85961	05/29/21	10:49:59	10	508.3	6.238	1.8	2.2	3.3	1481	1783	2108	0.942	0.148
FALSE	82	SG-127-3	83	85962	05/29/21	11:02:35	1	27.2	44.183	1.3	1.6	2.4	2442	2860	3364	-27.258	-33.561
FALSE	82	SG-127-3	83	85962	05/29/21	11:02:35	2	72.9	44.435	1.6	2	2.8	2442	2859	3364	-27.339	-33.571
FALSE	82	SG-127-3	83	85962	05/29/21	11:02:35	3	118.7	44.407	1.6	2	2.9	2440	2857	3360	-27.35	-33.6
FALSE	82	SG-127-3	83	85962	05/29/21	11:02:35	4	164.5	44.503	1.7	2.1	3	2444	2862	3367	-27.364	-33.619
FALSE	82	SG-127-3	83	85962	05/29/21	11:02:35	5	209.6	12.562	1.6	2	3	2958	3561	4214	0.909	-0.019
SG-127-3	82	SG-127-3	83	85962	05/29/21	11:02:35	6	269.4	12.555	2	2.4	3.5	2960	3563	4208	1.09	0.298
SG-127-3	82	SG-127-3	83	85962	05/29/21	11:02:35	7	329.2	12.089	2.1	2.6	3.7	2853	3435	4062	1.053	0.335
SG-127-3	82	SG-127-3	83	85962	05/29/21	11:02:35	8	388.7	11.613	2.1	2.6	3.7	2742	3302	3905	1.138	0.43
SG-127-3	82	SG-127-3	83	85962	05/29/21	11:02:35	9	448.5	11.187	2.1	2.6	3.7	2645	3184	3765	1.077	0.479
SG-127-3	82	SG-127-3	83	85962	05/29/21	11:02:35	10	508.1	10.738	2.1	2.6	3.7	2540	3058	3621	1.076	0.523
FALSE	83	SG-127-4	55	85963	05/29/21	11:15:10	1	27.2	44.067	1.4	1.7	2.5	2434	2850	3353	-27.28	-33.553
FALSE	83	SG-127-4	55	85963	05/29/21	11:15:10	2	72.9	44.372	1.6	2	2.9	2438	2854	3358	-27.33	-33.583
FALSE	83	SG-127-4	55	85963	05/29/21	11:15:10	3	118.7	44.396	1.7	2.1	3	2439	2856	3360	-27.35	-33.6
FALSE	83	SG-127-4	55	85963	05/29/21	11:15:10	4	164.5	44.387	1.7	2.1	3.1	2437	2853	3357	-27.353	-33.58
FALSE	83	SG-127-4	55	85963	05/29/21	11:15:10	5	209.6	8.353	1.6	2	2.9	1972	2374	2805	1.069	0.08
SG-127-4	83	SG-127-4	55	85963	05/29/21	11:15:10	6	269.4	8.322	1.8	2.3	3.2	1966	2367	2798	1.116	0.539
SG-127-4	83	SG-127-4	55	85963	05/29/21	11:15:10	7	329.2	7.987	1.9	2.3	3.3	1886	2271	2689	1.188	0.618
SG-127-4	83	SG-127-4	55	85963	05/29/21	11:15:10	8	388.7	7.663	1.9	2.3	3.3	1815	2186	2581	1.234	0.518
SG-127-4	83	SG-127-4	55	85963	05/29/21	11:15:10	9	448.5	7.364	1.9	2.3	3.3	1743	2099	2485	1.295	0.618
SG-127-4	83	SG-127-4	55	85963	05/29/21	11:15:10	10	508.1	7.089	1.9	2.3	3.3	1680	2023	2389	1.232	0.661
FALSE	84	SG-127-5	84	85964	05/29/21	11:27:46	1	27.2	44.081	1.3	1.7	2.5	2438	2855	3359	-27.278	-33.541
FALSE	84	SG-127-5	84	85964	05/29/21	11:27:46	2	72.9	44.337	1.6	2	2.9	2436	2853	3356	-27.328	-33.592
FALSE	84	SG-127-5	84	85964	05/29/21	11:27:46	3	118.7	44.386	1.7	2	3	2435	2851	3354	-27.35	-33.6
FALSE	84	SG-127-5	84	85964	05/29/21	11:27:46	4	164.5	44.357	1.7	2.1	3	2435	2852	3355	-27.349	-33.598
FALSE	84	SG-127-5	84	85964	05/29/21	11:27:46	5	209.6	9.687	1.7	2	3.1	2298	2766	3273	0.997	1.176
SG-127-5	84	SG-127-5	84	85964	05/29/21	11:27:46	6	269.4	9.665	1.9	2.3	3.5	2290	2756	3267	1.188	1.493
SG-127-5	84	SG-127-5	84	85964	05/29/21	11:27:46	7	329	9.314	2	2.4	3.6	2207	2658	3143	1.156	1.538
SG-127-5	84	SG-127-5	84	85964	05/29/21	11:27:46	8	388.7	8.976	2	2.5	3.7	2129	2563	3031	1.148	1.518
SG-127-5	84	SG-127-5	84	85964	05/29/21	11:27:46	9	448.5	8.645	2	2.5	3.7	2047	2464	2920	1.093	1.598
SG-127-5	84	SG-127-5	84	85964	05/29/21	11:27:46	10	508.1	8.325	2	2.5	3.8	1971	2374	2806	1.19	1.575
FALSE	85	Kiel Carbo d	84	85965	05/29/21	11:40:23	1	27.2	44.056	1.4	1.8	2.7	2432	2846	3347	-27.312	-33.633
FALSE	85	Kiel Carbo d	84	85965	05/29/21	11:40:23	2	72.9	44.337	1.7	2.1	3	2438	2853	3357	-27.372	-33.648
FALSE	85	Kiel Carbo d	84	85965	05/29/21	11:40:23	3	118.7	44.277	1.7	2.1	3.1	2432	2846	3349	-27.35	-33.6
FALSE	85	Kiel Carbo d	84	85965	05/29/21	11:40:23	4	164.5	44.288	1.7	2.1	3.2	2429	2843	3344	-27.379	-33.676
FALSE	85	Kiel Carbo d	84	85965	05/29/21	11:40:23	5	209.6	7.142	1.7	2	3	1690	1964	2362	-34.681	-16.991
Kiel Carbo d	85	Kiel Carbo d	84	85965	05/29/21	11:40:23	6	269.2	7.155	1.8	2.2	3.3	1694	1970	2371	-34.671	-16.714
Kiel Carbo d	85	Kiel Carbo d	84	85965	05/29/21	11:40:23	7	329	6.839	1.8	2.2	3.3	1622	1886	2267	-34.681	-16.763
Kiel Carbo d	85	Kiel Carbo d	84	85965	05/29/21	11:40:23	8	388.7	6.568	1.8	2.2	3.3	1560	1814	2182	-34.708	-16.593
Kiel Carbo d	85	Kiel Carbo d	84	85965	05/29/21	11:40:23	9	448.3	6.304	1.8	2.3	3.3	1497	1740	2094	-34.81	-16.653
Kiel Carbo d	85	Kiel Carbo d	84	85965	05/29/21	11:40:23	10	508.1	6.054	1.8	2.2	3.2	1440	1675	2014	-34.669	-16.517
FALSE	86	naxos-10	112	85966	05/29/21	11:53:02	1	27.2	44.029	1.3	1.7	2.5	2431	2847	3349	-27.232	-33.54
FALSE	86	naxos-10	112	85966	05/29/21	11:53:02	2	72.9	44.238	1.6	2	2.9	2433	2849	3352	-27.313	-33.578
FALSE	86	naxos-10	112	85966	05/29/21	11:53:02	3	118.7	44.299	1.7	2.1	3	2432	2849	3351	-27.35	-33.6
FALSE	86	naxos-10	112	85966	05/29/21	11:53:02	4	164.5	44.239	1.7	2.1	3.1	2433	2849	3351	-27.352	-33.58
FALSE	86	naxos-10	112	85966	05/29/21	11:53:02	5	209.4	21.161	1.7	2.1	3	4998	6023	7068	2.09	-7.779
naxos-10	86	naxos-10	112	85966	05/29/21	11:53:02	6	269.2	21.164	2.4	2.9	4	5005	6033	7065	2.342	-7.412
naxos-10	86	naxos-10	112	85966	05/29/21	11:53:02	7	329	20.43	2.6	3.2	4.4	4830	5822	6819	2.375	-7.336
naxos-10	86	naxos-10	112	85966	05/29/21	11:53:02	8	388.7	19.652	2.7	3.3	4.5	4647	5601	6570	2.363	-7.356
naxos-10	86	naxos-10	112	85966	05/29/21	11:53:02	9	448.3	18.938	2.7	3.3	4.6	4478	5399	6323	2.356	-7.339
naxos-10	86	naxos-10	112	85966	05/29/21	11:53:02	10	508.1	18.215	2.7	3.3	4.6	4313	5197	6092	2.375	-7.288
FALSE	87	naxos-11	80	85967	05/29/21	12:05:37	1	27.2	43.968	1.5	1.9	2.8	2429	2845	3347	-27.258	-33.575
FALSE	87	naxos-11	80	85967	05/29/21	12:05:37	2	72.9	44.222	1.8	2.2	3.2	2431	2847	3350	-27.333	-33.633
FALSE	87	naxos-11	80	85967	05/29/21	12:05:37	3	118.7	44.192	1.8	2.3	3.2	2431	2847	3348	-27.35	-33.6
FALSE	87	naxos-11	80	85967	05/29/21	12:05:37	4	164.5	44.256	1.8	2.3	3.3	2428	2844	3346	-27.377	-33.648
FALSE	87	naxos-11	80	85967	05/29/21	12:05:37	5	209.4	15.528	1.7	2.1	3.2	3676	4430	5193	2.145	-7.969
naxos-11	87	naxos-11	80	85967	05/29/21	12:05:37	6	269.2	15.502	2.2	2.7	3.8	3673	4427	5183	2.26	-7.412
naxos-11	87	naxos-11	80	85967	05/29/21	12:05:37	7	329	14.935	2.4	2.9	4	3535	4260	4993	2.271	-7.407
naxos-11	87	naxos-11	80	85967	05/29/21	12:05:37	8	388.5	14.358	2.4	3	4.1	3398	4096	4806	2.291	-7.482
naxos-11	87	naxos-11	80	85967	05/29/21	12:05:37	9	448.3	13.838	2.4	3	4.1	3280	3953	4630	2.291	-7.41
naxos-11	87	naxos-11	80	85967	05/29/21	12:05:37	10	508.1	13.297	2.4	3	4.1	3156	3802	4462	2.266	-7.317

## Sheet: zeroCO2.wke
Row	Identifier 1	Identifier 2 [μg]	Analysis	Date	Time	Peak Nr	Rt	Area All	BGD 44	BGD 45	BGD 46	Ampl 44 [mV]	Ampl 45 [m	Ampl 46 [mV]	d 13C/12C [‰]	d 18O/16O [‰]	Information
1	acid1		85881	05/28/21	17:57:44	1	29.3	49.165	1.5	1.8	2.3	2452	2872	3378	-27.263	-33.52	Peak Center found at (59107);Inject Sample No 1
1	acid1		85881	05/28/21	17:57:44	2	79	49.674	1.8	2.0	2.8	2452	2872	3379	-27.334	-33.622	Peak Center found at (59107);Inject Sample No 1
1	acid1		85881	05/28/21	17:57:44	3	128.7	49.591	1.8	2.1	2.9	2451	2870	3377	-27.35	-33.6	Peak Center found at (59107);Inject Sample No 1
1	acid1		85881	05/28/21	17:57:44	4	178.5	49.645	1.8	2.1	2.8	2453	2872	3378	-27.362	-33.593	Peak Center found at (59107);Inject Sample No 1
1	acid1		85881	05/28/21	17:57:44	5	228.2	49.788	1.8	2.2	2.9	2456	2876	3383	-27.404	-33.66	Peak Center found at (59107);Inject Sample No 1
1	acid1		85881	05/28/21	17:57:44	6	278	49.716	1.8	2.2	2.9	2451	2870	3376	-27.415	-33.641	Peak Center found at (59107);Inject Sample No 1
1	acid1		85881	05/28/21	17:57:44	7	327.9	49.773	1.8	2.2	2.9	2455	2875	3383	-27.379	-33.613	Peak Center found at (59107);Inject Sample No 1
1	acid1		85881	05/28/21	17:57:44	8	377.7	49.645	1.8	2.2	2.9	2455	2874	3382	-27.361	-33.606	Peak Center found at (59107);Inject Sample No 1
1	acid1		85881	05/28/21	17:57:44	9	427.4	49.76	1.9	2.2	2.9	2453	2872	3378	-27.358	-33.596	Peak Center found at (59107);Inject Sample No 1
1	acid1		85881	05/28/21	17:57:44	10	477.1	49.76	1.8	2.2	2.9	2453	2873	3380	-27.401	-33.635	Peak Center found at (59107);Inject Sample No 1
2	acid2		85882	05/28/21	18:10:20	1	29.3	49.107	1.4	1.6	2.2	2448	2867	3374	-27.265	-33.569	Peak Center found at (59107);Inject Sample No 2
2	acid2		85882	05/28/21	18:10:20	2	79	49.633	1.7	2.0	2.6	2450	2869	3375	-27.356	-33.593	Peak Center found at (59107);Inject Sample No 2
2	acid2		85882	05/28/21	18:10:20	3	128.7	49.608	1.8	2.1	2.8	2449	2869	3375	-27.35	-33.6	Peak Center found at (59107);Inject Sample No 2
2	acid2		85882	05/28/21	18:10:20	4	178.5	49.701	1.8	2.1	2.8	2454	2873	3380	-27.37	-33.631	Peak Center found at (59107);Inject Sample No 2
2	acid2		85882	05/28/21	18:10:20	5	228.2	49.5	1.8	2.2	2.8	2447	2865	3370	-27.39	-33.619	Peak Center found at (59107);Inject Sample No 2
2	acid2		85882	05/28/21	18:10:20	6	278	49.599	1.8	2.2	2.8	2448	2867	3372	-27.372	-33.604	Peak Center found at (59107);Inject Sample No 2
2	acid2		85882	05/28/21	18:10:20	7	327.9	49.588	1.8	2.2	2.9	2448	2867	3374	-27.367	-33.628	Peak Center found at (59107);Inject Sample No 2
2	acid2		85882	05/28/21	18:10:20	8	377.7	49.539	1.8	2.2	2.9	2444	2862	3365	-27.368	-33.643	Peak Center found at (59107);Inject Sample No 2
2	acid2		85882	05/28/21	18:10:20	9	427.4	49.597	1.8	2.2	2.9	2445	2863	3368	-27.355	-33.59	Peak Center found at (59107);Inject Sample No 2
2	acid2		85882	05/28/21	18:10:20	10	477.1	49.634	1.8	2.1	2.9	2451	2870	3377	-27.363	-33.612	Peak Center found at (59107);Inject Sample No 2
3	acid3		85883	05/28/21	18:22:59	1	29.1	49.132	1.4	1.7	2.2	2450	2869	3375	-27.24	-33.501	Peak Center found at (59103);Inject Sample No 3
3	acid3		85883	05/28/21	18:22:59	2	79	49.728	1.7	2.0	2.7	2451	2869	3375	-27.342	-33.571	Peak Center found at (59103);Inject Sample No 3
3	acid3		85883	05/28/21	18:22:59	3	128.7	49.694	1.7	2.1	2.8	2453	2871	3377	-27.35	-33.6	Peak Center found at (59103);Inject Sample No 3
3	acid3		85883	05/28/21	18:22:59	4	178.5	49.675	1.8	2.1	2.8	2446	2864	3368	-27.349	-33.601	Peak Center found at (59103);Inject Sample No 3
3	acid3		85883	05/28/21	18:22:59	5	228.2	49.716	1.8	2.2	2.8	2455	2873	3380	-27.353	-33.56	Peak Center found at (59103);Inject Sample No 3
3	acid3		85883	05/28/21	18:22:59	6	278	49.696	1.8	2.1	2.9	2452	2870	3376	-27.358	-33.565	Peak Center found at (59103);Inject Sample No 3
3	acid3		85883	05/28/21	18:22:59	7	327.9	49.708	1.8	2.2	2.9	2452	2870	3376	-27.331	-33.606	Peak Center found at (59103);Inject Sample No 3
3	acid3		85883	05/28/21	18:22:59	8	377.7	49.678	1.8	2.2	2.8	2452	2871	3377	-27.335	-33.569	Peak Center found at (59103);Inject Sample No 3
3	acid3		85883	05/28/21	18:22:59	9	427.4	49.705	1.8	2.2	2.8	2450	2868	3374	-27.336	-33.543	Peak Center found at (59103);Inject Sample No 3
3	acid3		85883	05/28/21	18:22:59	10	477.1	49.723	1.8	2.2	2.9	2456	2874	3381	-27.375	-33.595	Peak Center found at (59103);Inject Sample No 3
4	acid4		85884	05/28/21	18:38:46	1	29.3	47.47	1.5	1.7	2.3	2448	2867	3373	-27.258	-33.559	Peak Center found at (59108);Inject Sample No 4
4	acid4		85884	05/28/21	18:38:46	2	79	49.675	1.7	2.1	2.7	2453	2873	3380	-27.302	-33.558	Peak Center found at (59108);Inject Sample No 4
4	acid4		85884	05/28/21	18:38:46	3	128.7	49.727	1.8	2.1	2.8	2454	2874	3380	-27.35	-33.6	Peak Center found at (59108);Inject Sample No 4
4	acid4		85884	05/28/21	18:38:46	4	178.5	49.754	1.8	2.2	2.9	2454	2874	3380	-27.357	-33.595	Peak Center found at (59108);Inject Sample No 4
4	acid4		85884	05/28/21	18:38:46	5	228.2	49.658	1.8	2.2	2.8	2453	2873	3380	-27.339	-33.609	Peak Center found at (59108);Inject Sample No 4
4	acid4		85884	05/28/21	18:38:46	6	278	49.649	1.8	2.2	2.9	2450	2869	3376	-27.328	-33.602	Peak Center found at (59108);Inject Sample No 4
4	acid4		85884	05/28/21	18:38:46	7	327.7	49.72	1.8	2.2	2.8	2449	2869	3376	-27.353	-33.585	Peak Center found at (59108);Inject Sample No 4
4	acid4		85884	05/28/21	18:38:46	8	377.7	49.724	1.8	2.2	2.9	2453	2873	3380	-27.35	-33.609	Peak Center found at (59108);Inject Sample No 4
4	acid4		85884	05/28/21	18:38:46	9	427.4	49.518	1.8	2.2	2.9	2444	2862	3367	-27.343	-33.568	Peak Center found at (59108);Inject Sample No 4
4	acid4		85884	05/28/21	18:38:46	10	477.1	49.623	1.8	2.2	2.9	2448	2867	3373	-27.353	-33.575	Peak Center found at (59108);Inject Sample No 4
5	acid5		85885	05/28/21	18:50:22	1	29.3	49.099	1.5	1.7	2.3	2452	2874	3382	-27.301	-33.584	Peak Center found at (59112);Inject Sample No 5
5	acid5		85885	05/28/21	18:50:22	2	79	49.525	1.7	2.0	2.7	2443	2862	3368	-27.352	-33.601	Peak Center found at (59112);Inject Sample No 5
5	acid5		85885	05/28/21	18:50:22	3	128.7	49.652	1.8	2.1	2.8	2452	2873	3380	-27.35	-33.6	Peak Center found at (59112);Inject Sample No 5
5	acid5		85885	05/28/21	18:50:22	4	178.5	49.588	1.8	2.1	2.9	2443	2862	3368	-27.361	-33.633	Peak Center found at (59112);Inject Sample No 5
5	acid5		85885	05/28/21	18:50:22	5	228.2	49.572	1.8	2.1	2.8	2442	2861	3367	-27.353	-33.599	Peak Center found at (59112);Inject Sample No 5
5	acid5		85885	05/28/21	18:50:22	6	278	49.636	1.8	2.2	2.8	2450	2870	3377	-27.386	-33.604	Peak Center found at (59112);Inject Sample No 5
5	acid5		85885	05/28/21	18:50:22	7	327.9	49.618	1.8	2.2	2.8	2445	2866	3371	-27.37	-33.621	Peak Center found at (59112);Inject Sample No 5
5	acid5		85885	05/28/21	18:50:22	8	377.7	49.638	1.8	2.2	2.9	2449	2869	3377	-27.346	-33.576	Peak Center found at (59112);Inject Sample No 5
5	acid5		85885	05/28/21	18:50:22	9	427.4	49.601	1.8	2.2	2.9	2451	2872	3379	-27.357	-33.575	Peak Center found at (59112);Inject Sample No 5
5	acid5		85885	05/28/21	18:50:22	10	477.1	49.522	1.8	2.2	2.9	2442	2861	3367	-27.353	-33.598	Peak Center found at (59112);Inject Sample No 5
6	acid6		85886	05/28/21	19:03:01	1	29.3	49.033	1.4	1.6	2.2	2449	2870	3377	-27.247	-33.557	Peak Center found at (59112);Inject Sample No 6
6	acid6		85886	05/28/21	19:03:01	2	79	49.518	1.7	2.0	2.6	2441	2861	3366	-27.319	-33.584	Peak Center found at (59112);Inject Sample No 6
6	acid6		85886	05/28/21	19:03:01	3	128.7	49.571	1.7	2.1	2.7	2440	2859	3364	-27.35	-33.6	Peak Center found at (59112);Inject Sample No 6
6	acid6		85886	05/28/21	19:03:01	4	178.5	49.485	1.7	2.1	2.8	2443	2863	3367	-27.364	-33.621	Peak Center found at (59112);Inject Sample No 6
6	acid6		85886	05/28/21	19:03:01	5	228.2	49.531	1.8	2.1	2.8	2440	2858	3363	-27.324	-33.609	Peak Center found at (59112);Inject Sample No 6
6	acid6		85886	05/28/21	19:03:01	6	278	49.451	1.8	2.1	2.8	2445	2865	3371	-27.342	-33.622	Peak Center found at (59112);Inject Sample No 6
6	acid6		85886	05/28/21	19:03:01	7	327.9	49.457	1.8	2.1	2.8	2437	2856	3361	-27.317	-33.591	Peak Center found at (59112);Inject Sample No 6
6	acid6		85886	05/28/21	19:03:01	8	377.7	49.57	1.8	2.1	2.8	2444	2863	3369	-27.354	-33.562	Peak Center found at (59112);Inject Sample No 6
6	acid6		85886	05/28/21	19:03:01	9	427.4	49.517	1.8	2.2	2.8	2441	2861	3366	-27.335	-33.566	Peak Center found at (59112);Inject Sample No 6
6	acid6		85886	05/28/21	19:03:01	10	477.1	49.504	1.8	2.2	2.8	2443	2863	3369	-27.332	-33.582	Peak Center found at (59112);Inject Sample No 6
7	acid7		85887	05/28/21	19:15:40	1	29.3	48.851	1.4	1.6	2.2	2433	2851	3354	-27.265	-33.504	Peak Center found at (59108);Inject Sample No 7
7	acid7		85887	05/28/21	19:15:40	2	79	49.443	1.6	1.9	2.6	2443	2861	3366	-27.345	-33.549	Peak Center found at (59108);Inject Sample No 7
7	acid7		85887	05/28/21	19:15:40	3	128.7	49.531	1.7	2.0	2.7	2445	2863	3369	-27.35	-33.6	Peak Center found at (59108);Inject Sample No 7
7	acid7		85887	05/28/21	19:15:40	4	178.5	49.546	1.7	2.1	2.7	2445	2864	3369	-27.388	-33.562	Peak Center found at (59108);Inject Sample No 7
7	acid7		85887	05/28/21	19:15:40	5	228.2	49.598	1.8	2.1	2.8	2442	2861	3365	-27.418	-33.585	Peak Center found at (59108);Inject Sample No 7
7	acid7		85887	05/28/21	19:15:40	6	278	49.501	1.8	2.1	2.8	2444	2862	3368	-27.408	-33.537	Peak Center found at (59108);Inject Sample No 7
7	acid7		85887	05/28/21	19:15:40	7	327.7	49.42	1.8	2.1	2.8	2439	2856	3361	-27.399	-33.59	Peak Center found at (59108);Inject Sample No 7
7	acid7		85887	05/28/21	19:15:40	8	377.7	49.488	1.8	2.1	2.8	2447	2866	3372	-27.396	-33.577	Peak Center found at (59108);Inject Sample No 7
7	acid7		85887	05/28/21	19:15:40	9	427.4	49.515	1.8	2.1	2.8	2447	2866	3372	-27.415	-33.58	Peak Center found at (59108);Inject Sample No 7
7	acid7		85887	05/28/21	19:15:40	10	477.1	49.55	1.8	2.1	2.9	2448	2867	3372	-27.411	-33.589	Peak Center found at (59108);Inject Sample No 7
8	acid8		85888	05/28/21	19:28:21	1	29.3	48.854	1.3	1.6	2.1	2447	2867	3372	-27.23	-33.552	Peak Center found at (59108);Inject Sample No 8
8	acid8		85888	05/28/21	19:28:21	2	79	49.47	1.6	2.0	2.6	2445	2864	3369	-27.32	-33.568	Peak Center found at (59108);Inject Sample No 8
8	acid8		85888	05/28/21	19:28:21	3	128.7	49.58	1.7	2.0	2.7	2445	2864	3369	-27.35	-33.6	Peak Center found at (59108);Inject Sample No 8
8	acid8		85888	05/28/21	19:28:21	4	178.5	49.481	1.7	2.1	2.7	2441	2858	3362	-27.357	-33.604	Peak Center found at (59108);Inject Sample No 8
8	acid8		85888	05/28/21	19:28:21	5	228.4	49.636	1.8	2.1	2.8	2444	2863	3369	-27.357	-33.59	Peak Center found at (59108);Inject Sample No 8
8	acid8		85888	05/28/21	19:28:21	6	278	49.417	1.8	2.1	2.8	2443	2861	3366	-27.336	-33.573	Peak Center found at (59108);Inject Sample No 8
8	acid8		85888	05/28/21	19:28:21	7	327.9	49.533	1.8	2.1	2.7	2444	2863	3368	-27.344	-33.56	Peak Center found at (59108);Inject Sample No 8
8	acid8		85888	05/28/21	19:28:21	8	377.7	49.389	1.8	2.1	2.8	2440	2858	3363	-27.362	-33.598	Peak Center found at (59108);Inject Sample No 8
8	acid8		85888	05/28/21	19:28:21	9	427.4	49.576	1.8	2.1	2.8	2450	2870	3376	-27.38	-33.59	Peak Center found at (59108);Inject Sample No 8
8	acid8		85888	05/28/21	19:28:21	10	477.1	49.453	1.8	2.1	2.8	2441	2858	3363	-27.35	-33.579	Peak Center found at (59108);Inject Sample No 8
9	naxos-1	113	85889	05/28/21	19:41:00	1	27.2	44.181	1.3	1.6	2.1	2442	2861	3366	-27.265	-33.557	Peak Center found at (59112);Inject Sample No 9
9	naxos-1	113	85889	05/28/21	19:41:00	2	72.9	44.464	1.6	2.0	2.6	2444	2864	3370	-27.345	-33.619	Peak Center found at (59112);Inject Sample No 9
9	naxos-1	113	85889	05/28/21	19:41:00	3	118.7	44.413	1.7	2.1	2.7	2440	2859	3364	-27.35	-33.6	Peak Center found at (59112);Inject Sample No 9
9	naxos-1	113	85889	05/28/21	19:41:00	4	164.5	44.468	1.7	2.0	2.8	2438	2856	3361	-27.365	-33.639	Peak Center found at (59112);Inject Sample No 9
9	naxos-1	113	85889	05/28/21	19:41:00	5	209.6	25.483	1.7	2.0	2.7	5976	7207	8450	2.257	-7.555	Peak Center found at (59112);Inject Sample No 9
9	naxos-1	113	85889	05/28/21	19:41:00	6	269.2	25.616	2.6	3.1	3.9	6023	7267	8523	2.441	-7.168	Peak Center found at (59112);Inject Sample No 9
9	naxos-1	113	85889	05/28/21	19:41:00	7	329	24.6	2.8	3.4	4.3	5798	6995	8187	2.457	-7.098	Peak Center found at (59112);Inject Sample No 9
9	naxos-1	113	85889	05/28/21	19:41:00	8	388.7	23.649	2.9	3.5	4.5	5584	6735	7892	2.405	-7.18	Peak Center found at (59112);Inject Sample No 9
9	naxos-1	113	85889	05/28/21	19:41:00	9	448.5	22.751	3.0	3.6	4.5	5362	6467	7592	2.387	-7.124	Peak Center found at (59112);Inject Sample No 9
9	naxos-1	113	85889	05/28/21	19:41:00	10	508.1	21.897	3.0	3.6	4.5	5174	6241	7306	2.423	-7.128	Peak Center found at (59112);Inject Sample No 9
10	naxos-2	85	85890	05/28/21	19:53:35	1	27.2	44.213	1.6	1.9	2.5	2450	2870	3377	-27.272	-33.539	Peak Center found at (59112);Inject Sample No 10
10	naxos-2	85	85890	05/28/21	19:53:35	2	72.9	44.449	1.8	2.2	2.9	2436	2855	3358	-27.337	-33.609	Peak Center found at (59112);Inject Sample No 10
10	naxos-2	85	85890	05/28/21	19:53:35	3	118.7	44.363	1.9	2.2	2.9	2438	2857	3361	-27.35	-33.6	Peak Center found at (59112);Inject Sample No 10
10	naxos-2	85	85890	05/28/21	19:53:35	4	164.5	44.491	1.9	2.2	3.0	2440	2860	3364	-27.343	-33.613	Peak Center found at (59112);Inject Sample No 10
10	naxos-2	85	85890	05/28/21	19:53:35	5	209.6	16.264	1.8	2.1	2.8	3819	4604	5390	2.054	-7.778	Peak Center found at (59112);Inject Sample No 10
10	naxos-2	85	85890	05/28/21	19:53:35	6	269.4	16.319	2.3	2.7	3.5	3847	4638	5440	2.156	-7.458	Peak Center found at (59112);Inject Sample No 10
10	naxos-2	85	85890	05/28/21	19:53:35	7	329	15.637	2.4	2.9	3.7	3691	4452	5220	2.165	-7.435	Peak Center found at (59112);Inject Sample No 10
10	naxos-2	85	85890	05/28/21	19:53:35	8	388.7	15.005	2.5	2.9	3.8	3553	4284	5017	2.152	-7.385	Peak Center found at (59112);Inject Sample No 10
10	naxos-2	85	85890	05/28/21	19:53:35	9	448.5	14.402	2.5	3.0	3.8	3410	4111	4822	2.126	-7.406	Peak Center found at (59112);Inject Sample No 10
10	naxos-2	85	85890	05/28/21	19:53:35	10	508.1	13.869	2.5	2.9	3.8	3280	3955	4636	2.178	-7.348	Peak Center found at (59112);Inject Sample No 10
11	Kiel Carbo a	62	85891	05/28/21	20:06:12	1	27.2	44.215	1.5	1.8	2.4	2440	2859	3363	-27.268	-33.573	Peak Center found at (59112);Inject Sample No 11
11	Kiel Carbo a	62	85891	05/28/21	20:06:12	2	72.9	44.408	1.8	2.1	2.8	2441	2860	3365	-27.304	-33.615	Peak Center found at (59112);Inject Sample No 11
11	Kiel Carbo a	62	85891	05/28/21	20:06:12	3	118.7	44.477	1.8	2.1	2.8	2443	2862	3367	-27.35	-33.6	Peak Center found at (59112);Inject Sample No 11
11	Kiel Carbo a	62	85891	05/28/21	20:06:12	4	164.5	44.487	1.8	2.2	2.9	2440	2860	3363	-27.352	-33.634	Peak Center found at (59112);Inject Sample No 11
11	Kiel Carbo a	62	85891	05/28/21	20:06:12	5	209.6	11.275	1.7	2.1	2.7	2668	3104	3734	-34.83	-16.816	Peak Center found at (59112);Inject Sample No 11
11	Kiel Carbo a	62	85891	05/28/21	20:06:12	6	269.4	11.287	2.0	2.4	3.1	2672	3110	3747	-34.687	-16.56	Peak Center found at (59112);Inject Sample No 11
11	Kiel Carbo a	62	85891	05/28/21	20:06:12	7	329	10.84	2.1	2.5	3.3	2572	2994	3601	-34.772	-16.49	Peak Center found at (59112);Inject Sample No 11
11	Kiel Carbo a	62	85891	05/28/21	20:06:12	8	388.7	10.418	2.1	2.5	3.3	2476	2881	3465	-34.685	-16.492	Peak Center found at (59112);Inject Sample No 11
11	Kiel Carbo a	62	85891	05/28/21	20:06:12	9	448.3	10.013	2.1	2.5	3.2	2375	2764	3331	-34.775	-16.339	Peak Center found at (59112);Inject Sample No 11
11	Kiel Carbo a	62	85891	05/28/21	20:06:12	10	508.1	9.651	2.1	2.5	3.3	2292	2668	3208	-34.722	-16.416	Peak Center found at (59112);Inject Sample No 11
12	SG-126-1	59	85892	05/28/21	20:18:50	1	27.2	44.141	1.4	1.7	2.3	2440	2859	3363	-27.241	-33.6	Peak Center found at (59112);Inject Sample No 12
12	SG-126-1	59	85892	05/28/21	20:18:50	2	72.9	44.466	1.7	2.0	2.7	2441	2860	3365	-27.331	-33.617	Peak Center found at (59112);Inject Sample No 12
12	SG-126-1	59	85892	05/28/21	20:18:50	3	118.7	44.472	1.8	2.1	2.8	2446	2865	3371	-27.35	-33.6	Peak Center found at (59112);Inject Sample No 12
12	SG-126-1	59	85892	05/28/21	20:18:50	4	164.5	44.445	1.8	2.1	2.8	2444	2863	3369	-27.353	-33.629	Peak Center found at (59112);Inject Sample No 12
12	SG-126-1	59	85892	05/28/21	20:18:50	5	209.6	6.42	1.7	2.0	2.7	1525	1837	2175	0.888	1.891	Peak Center found at (59112);Inject Sample No 12
12	SG-126-1	59	85892	05/28/21	20:18:50	6	269.2	6.411	1.8	2.1	2.8	1521	1833	2174	1.37	2.534	Peak Center found at (59112);Inject Sample No 12
12	SG-126-1	59	85892	05/28/21	20:18:50	7	329	6.17	1.8	2.2	2.8	1465	1765	2091	1.277	2.668	Peak Center found at (59112);Inject Sample No 12
12	SG-126-1	59	85892	05/28/21	20:18:50	8	388.7	5.935	1.8	2.2	2.9	1412	1701	2015	1.351	2.62	Peak Center found at (59112);Inject Sample No 12
12	SG-126-1	59	85892	05/28/21	20:18:50	9	448.5	5.701	1.8	2.2	2.8	1354	1631	1935	1.474	2.827	Peak Center found at (59112);Inject Sample No 12
12	SG-126-1	59	85892	05/28/21	20:18:50	10	508.1	5.5	1.8	2.2	2.9	1307	1575	1863	1.383	2.477	Peak Center found at (59112);Inject Sample No 12
13	SG-126-3	58	85893	05/28/21	20:31:28	1	27.2	44.174	1.4	1.6	2.2	2440	2859	3364	-27.273	-33.536	Peak Center found at (59112);Inject Sample No 13
13	SG-126-3	58	85893	05/28/21	20:31:28	2	72.9	44.445	1.7	2.0	2.6	2441	2860	3364	-27.343	-33.58	Peak Center found at (59112);Inject Sample No 13
13	SG-126-3	58	85893	05/28/21	20:31:28	3	118.7	44.435	1.7	2.0	2.7	2441	2860	3365	-27.35	-33.6	Peak Center found at (59112);Inject Sample No 13
13	SG-126-3	58	85893	05/28/21	20:31:28	4	164.5	44.466	1.8	2.1	2.8	2442	2861	3365	-27.363	-33.553	Peak Center found at (59112);Inject Sample No 13
13	SG-126-3	58	85893	05/28/21	20:31:28	5	209.6	4.949	1.7	2.0	2.7	1176	1416	1675	0.44	0.625	Peak Center found at (59112);Inject Sample No 13
13	SG-126-3	58	85893	05/28/21	20:31:28	6	269.4	4.959	1.7	2.0	2.7	1178	1418	1680	0.664	0.947	Peak Center found at (59112);Inject Sample No 13
13	SG-126-3	58	85893	05/28/21	20:31:28	7	329	4.768	1.7	2.0	2.7	1133	1365	1617	0.645	1.035	Peak Center found at (59112);Inject Sample No 13
13	SG-126-3	58	85893	05/28/21	20:31:28	8	388.7	4.577	1.7	2.0	2.7	1090	1313	1551	0.754	0.917	Peak Center found at (59112);Inject Sample No 13
13	SG-126-3	58	85893	05/28/21	20:31:28	9	448.5	4.402	1.7	2.0	2.6	1048	1262	1494	0.723	1.159	Peak Center found at (59112);Inject Sample No 13
13	SG-126-3	58	85893	05/28/21	20:31:28	10	508.1	4.242	1.7	2.0	2.7	1009	1215	1437	0.753	0.942	Peak Center found at (59112);Inject Sample No 13
14	SG-126-4	52	85894	05/28/21	20:44:04	1	27.2	44.321	1.3	1.6	2.1	2450	2871	3378	-27.225	-33.601	Peak Center found at (59117);Inject Sample No 14
14	SG-126-4	52	85894	05/28/21	20:44:04	2	72.9	44.592	1.6	1.9	2.6	2449	2871	3378	-27.299	-33.581	Peak Center found at (59117);Inject Sample No 14
14	SG-126-4	52	85894	05/28/21	20:44:04	3	118.7	44.688	1.7	2.1	2.7	2452	2874	3382	-27.35	-33.6	Peak Center found at (59117);Inject Sample No 14
14	SG-126-4	52	85894	05/28/21	20:44:04	4	164.5	44.688	1.7	2.1	2.8	2453	2876	3383	-27.322	-33.597	Peak Center found at (59117);Inject Sample No 14
14	SG-126-4	52	85894	05/28/21	20:44:04	5	209.6	8.106	1.7	2.0	2.6	1909	2300	2717	0.66	0.069	Peak Center found at (59117);Inject Sample No 14
14	SG-126-4	52	85894	05/28/21	20:44:04	6	269.4	8.129	1.8	2.2	2.9	1921	2314	2735	0.832	0.343	Peak Center found at (59117);Inject Sample No 14
14	SG-126-4	52	85894	05/28/21	20:44:04	7	329.2	7.803	1.9	2.2	2.9	1846	2224	2631	0.837	0.533	Peak Center found at (59117);Inject Sample No 14
14	SG-126-4	52	85894	05/28/21	20:44:04	8	388.7	7.484	1.9	2.2	3.0	1771	2134	2527	0.845	0.449	Peak Center found at (59117);Inject Sample No 14
14	SG-126-4	52	85894	05/28/21	20:44:04	9	448.5	7.19	1.9	2.2	2.9	1706	2055	2430	0.818	0.457	Peak Center found at (59117);Inject Sample No 14
14	SG-126-4	52	85894	05/28/21	20:44:04	10	508.3	6.935	1.9	2.3	3.0	1644	1980	2345	0.9	0.497	Peak Center found at (59117);Inject Sample No 14
15	SG-126-5	90	85895	05/28/21	20:56:41	1	27.2	44.381	1.4	1.6	2.1	2453	2875	3381	-27.295	-33.518	Peak Center found at (59112);Inject Sample No 15
15	SG-126-5	90	85895	05/28/21	20:56:41	2	72.9	44.637	1.7	2.0	2.6	2453	2873	3381	-27.328	-33.551	Peak Center found at (59112);Inject Sample No 15
15	SG-126-5	90	85895	05/28/21	20:56:41	3	118.7	44.615	1.7	2.0	2.7	2452	2873	3380	-27.35	-33.6	Peak Center found at (59112);Inject Sample No 15
15	SG-126-5	90	85895	05/28/21	20:56:41	4	164.5	44.633	1.7	2.1	2.7	2451	2872	3378	-27.364	-33.569	Peak Center found at (59112);Inject Sample No 15
15	SG-126-5	90	85895	05/28/21	20:56:41	5	209.6	12.674	1.7	2.0	2.6	2986	3597	4255	0.974	-0.283	Peak Center found at (59112);Inject Sample No 15
15	SG-126-5	90	85895	05/28/21	20:56:41	6	269.4	12.722	2.0	2.4	3.2	3002	3617	4271	1.112	0.111	Peak Center found at (59112);Inject Sample No 15
15	SG-126-5	90	85895	05/28/21	20:56:41	7	329.2	12.231	2.1	2.6	3.3	2887	3478	4113	1.091	0.135	Peak Center found at (59112);Inject Sample No 15
15	SG-126-5	90	85895	05/28/21	20:56:41	8	388.9	11.757	2.2	2.6	3.3	2777	3345	3960	1.137	0.188	Peak Center found at (59112);Inject Sample No 15
15	SG-126-5	90	85895	05/28/21	20:56:41	9	448.5	11.321	2.2	2.6	3.3	2678	3227	3810	1.178	0.172	Peak Center found at (59112);Inject Sample No 15
15	SG-126-5	90	85895	05/28/21	20:56:41	10	508.3	10.91	2.2	2.6	3.3	2581	3109	3679	1.182	0.273	Peak Center found at (59112);Inject Sample No 15
16	SG-126-6	53	85896	05/28/21	21:09:20	1	27.2	44.333	1.4	1.7	2.2	2450	2871	3377	-27.257	-33.56	Peak Center found at (59112);Inject Sample No 16
16	SG-126-6	53	85896	05/28/21	21:09:20	2	72.9	44.59	1.7	2.0	2.6	2450	2871	3377	-27.311	-33.568	Peak Center found at (59112);Inject Sample No 16
16	SG-126-6	53	85896	05/28/21	21:09:20	3	118.7	44.644	1.8	2.1	2.7	2451	2871	3378	-27.35	-33.6	Peak Center found at (59112);Inject Sample No 16
16	SG-126-6	53	85896	05/28/21	21:09:20	4	164.5	44.618	1.8	2.1	2.8	2451	2871	3378	-27.369	-33.624	Peak Center found at (59112);Inject Sample No 16
16	SG-126-6	53	85896	05/28/21	21:09:20	5	209.8	6.758	1.7	2.0	2.7	1593	1918	2267	0.955	-0.303	Peak Center found at (59112);Inject Sample No 16
16	SG-126-6	53	85896	05/28/21	21:09:20	6	269.4	6.756	1.8	2.1	2.8	1594	1921	2271	1.044	0.179	Peak Center found at (59112);Inject Sample No 16
16	SG-126-6	53	85896	05/28/21	21:09:20	7	329.2	6.491	1.8	2.2	2.8	1536	1850	2185	1.059	0.229	Peak Center found at (59112);Inject Sample No 16
16	SG-126-6	53	85896	05/28/21	21:09:20	8	388.9	6.228	1.8	2.2	2.8	1475	1776	2102	1.105	0.245	Peak Center found at (59112);Inject Sample No 16
16	SG-126-6	53	85896	05/28/21	21:09:20	9	448.5	5.988	1.8	2.1	2.8	1419	1710	2018	1.193	0.184	Peak Center found at (59112);Inject Sample No 16
16	SG-126-6	53	85896	05/28/21	21:09:20	10	508.3	5.761	1.8	2.1	2.8	1366	1645	1946	1.092	0.312	Peak Center found at (59112);Inject Sample No 16
17	SG-126-7	62	85897	05/28/21	21:21:58	1	27.2	44.337	1.3	1.6	2.1	2454	2873	3380	-27.26	-33.567	Peak Center found at (59108);Inject Sample No 17
17	SG-126-7	62	85897	05/28/21	21:21:58	2	72.9	44.647	1.6	1.9	2.5	2449	2868	3373	-27.283	-33.56	Peak Center found at (59108);Inject Sample No 17
17	SG-126-7	62	85897	05/28/21	21:21:58	3	118.7	44.706	1.7	2.0	2.6	2456	2875	3383	-27.35	-33.6	Peak Center found at (59108);Inject Sample No 17
17	SG-126-7	62	85897	05/28/21	21:21:58	4	164.5	44.679	1.7	2.1	2.7	2455	2875	3381	-27.339	-33.629	Peak Center found at (59108);Inject Sample No 17
17	SG-126-7	62	85897	05/28/21	21:21:58	5	209.8	9.752	1.6	1.9	2.6	2292	2759	3262	0.949	0.272	Peak Center found at (59108);Inject Sample No 17
17	SG-126-7	62	85897	05/28/21	21:21:58	6	269.6	9.774	1.9	2.2	2.9	2301	2770	3279	1.009	0.631	Peak Center found at (59108);Inject Sample No 17
17	SG-126-7	62	85897	05/28/21	21:21:58	7	329.2	9.387	1.9	2.3	3.0	2211	2662	3150	1.07	0.645	Peak Center found at (59108);Inject Sample No 17
17	SG-126-7	62	85897	05/28/21	21:21:58	8	388.9	9.008	2.0	2.3	3.0	2127	2561	3029	1.018	0.707	Peak Center found at (59108);Inject Sample No 17
17	SG-126-7	62	85897	05/28/21	21:21:58	9	448.5	8.661	2.0	2.3	3.0	2045	2463	2914	1.042	0.689	Peak Center found at (59108);Inject Sample No 17
17	SG-126-7	62	85897	05/28/21	21:21:58	10	508.3	8.306	2.0	2.3	3.0	1968	2370	2800	1.101	0.662	Peak Center found at (59108);Inject Sample No 17
18	SG-126-8	66	85898	05/28/21	21:34:34	1	27.2	44.32	1.4	1.6	2.1	2450	2870	3376	-27.242	-33.529	Peak Center found at (59112);Inject Sample No 18
18	SG-126-8	66	85898	05/28/21	21:34:34	2	72.9	44.6	1.7	1.9	2.6	2448	2868	3374	-27.335	-33.604	Peak Center found at (59112);Inject Sample No 18
18	SG-126-8	66	85898	05/28/21	21:34:34	3	118.7	44.615	1.7	2.0	2.6	2453	2874	3381	-27.35	-33.6	Peak Center found at (59112);Inject Sample No 18
18	SG-126-8	66	85898	05/28/21	21:34:34	4	164.5	44.65	1.7	2.1	2.6	2449	2869	3375	-27.388	-33.587	Peak Center found at (59112);Inject Sample No 18
18	SG-126-8	66	85898	05/28/21	21:34:34	5	209.8	8.599	1.6	1.9	2.5	2018	2430	2872	0.659	0.619	Peak Center found at (59112);Inject Sample No 18
18	SG-126-8	66	85898	05/28/21	21:34:34	6	269.6	8.6	1.8	2.2	2.8	2024	2438	2887	0.781	1.057	Peak Center found at (59112);Inject Sample No 18
18	SG-126-8	66	85898	05/28/21	21:34:34	7	329.2	8.25	1.9	2.2	2.8	1943	2341	2772	0.885	1.194	Peak Center found at (59112);Inject Sample No 18
18	SG-126-8	66	85898	05/28/21	21:34:34	8	388.9	7.895	1.9	2.2	2.9	1867	2249	2660	0.869	1.166	Peak Center found at (59112);Inject Sample No 18
18	SG-126-8	66	85898	05/28/21	21:34:34	9	448.5	7.581	1.9	2.2	2.9	1792	2159	2557	0.959	1.178	Peak Center found at (59112);Inject Sample No 18
18	SG-126-8	66	85898	05/28/21	21:34:34	10	508.3	7.281	1.9	2.2	2.9	1726	2078	2458	0.891	1.112	Peak Center found at (59112);Inject Sample No 18
19	SG-126-9	99	85899	05/28/21	21:47:10	1	27.2	44.421	1.3	1.6	2.1	2450	2869	3374	-27.27	-33.503	Peak Center found at (59108);Inject Sample No 19
19	SG-126-9	99	85899	05/28/21	21:47:10	2	72.9	44.686	1.6	1.9	2.5	2454	2874	3380	-27.324	-33.581	Peak Center found at (59108);Inject Sample No 19
19	SG-126-9	99	85899	05/28/21	21:47:10	3	118.7	44.692	1.7	2.0	2.6	2456	2876	3383	-27.35	-33.6	Peak Center found at (59108);Inject Sample No 19
19	SG-126-9	99	85899	05/28/21	21:47:10	4	164.5	44.653	1.7	2.0	2.7	2455	2875	3381	-27.354	-33.596	Peak Center found at (59108);Inject Sample No 19
19	SG-126-9	99	85899	05/28/21	21:47:10	5	209.8	17.076	1.6	1.9	2.5	3991	4802	5687	0.454	1.957	Peak Center found at (59108);Inject Sample No 19
19	SG-126-9	99	85899	05/28/21	21:47:10	6	269.6	17.061	2.2	2.6	3.3	4003	4817	5714	0.596	2.366	Peak Center found at (59108);Inject Sample No 19
19	SG-126-9	99	85899	05/28/21	21:47:10	7	329.2	16.341	2.3	2.8	3.6	3839	4620	5476	0.621	2.3	Peak Center found at (59108);Inject Sample No 19
19	SG-126-9	99	85899	05/28/21	21:47:10	8	388.9	15.702	2.4	2.8	3.6	3699	4452	5272	0.635	2.32	Peak Center found at (59108);Inject Sample No 19
19	SG-126-9	99	85899	05/28/21	21:47:10	9	448.7	15.002	2.4	2.8	3.6	3540	4259	5056	0.581	2.371	Peak Center found at (59108);Inject Sample No 19
19	SG-126-9	99	85899	05/28/21	21:47:10	10	508.3	14.413	2.4	2.9	3.6	3413	4108	4864	0.594	2.29	Peak Center found at (59108);Inject Sample No 19
20	SG-126-10	62	85900	05/28/21	21:59:49	1	27.2	44.431	1.4	1.7	2.2	2452	2873	3380	-27.3	-33.581	Peak Center found at (59112);Inject Sample No 20
20	SG-126-10	62	85900	05/28/21	21:59:49	2	72.9	44.61	1.7	2.0	2.6	2455	2876	3384	-27.347	-33.627	Peak Center found at (59112);Inject Sample No 20
20	SG-126-10	62	85900	05/28/21	21:59:49	3	118.7	44.771	1.7	2.1	2.6	2458	2880	3388	-27.35	-33.6	Peak Center found at (59112);Inject Sample No 20
20	SG-126-10	62	85900	05/28/21	21:59:49	4	164.5	44.647	1.8	2.1	2.7	2449	2869	3374	-27.381	-33.608	Peak Center found at (59112);Inject Sample No 20
20	SG-126-10	62	85900	05/28/21	21:59:49	5	209.8	5.554	1.7	2.0	2.6	1312	1579	1868	0.188	0.471	Peak Center found at (59112);Inject Sample No 20
20	SG-126-10	62	85900	05/28/21	21:59:49	6	269.6	5.514	1.7	2.0	2.6	1306	1572	1860	0.334	0.961	Peak Center found at (59112);Inject Sample No 20
20	SG-126-10	62	85900	05/28/21	21:59:49	7	329.4	5.297	1.7	2.1	2.6	1252	1507	1786	0.303	1.062	Peak Center found at (59112);Inject Sample No 20
20	SG-126-10	62	85900	05/28/21	21:59:49	8	388.9	5.078	1.7	2.0	2.6	1204	1449	1713	0.334	0.956	Peak Center found at (59112);Inject Sample No 20
20	SG-126-10	62	85900	05/28/21	21:59:49	9	448.7	4.886	1.7	2.0	2.7	1159	1395	1652	0.455	0.7	Peak Center found at (59112);Inject Sample No 20
20	SG-126-10	62	85900	05/28/21	21:59:49	10	508.3	4.701	1.7	2.0	2.6	1115	1342	1589	0.393	0.954	Peak Center found at (59112);Inject Sample No 20
21	naxos-3	120	85901	05/28/21	22:12:24	1	27.2	44.476	1.3	1.5	2.1	2460	2881	3389	-27.302	-33.595	Peak Center found at (59112);Inject Sample No 21
21	naxos-3	120	85901	05/28/21	22:12:24	2	72.9	44.743	1.6	1.9	2.5	2465	2887	3396	-27.355	-33.579	Peak Center found at (59112);Inject Sample No 21
21	naxos-3	120	85901	05/28/21	22:12:24	3	118.7	44.768	1.7	2.0	2.6	2461	2883	3391	-27.35	-33.6	Peak Center found at (59112);Inject Sample No 21
21	naxos-3	120	85901	05/28/21	22:12:24	4	164.5	44.906	1.7	2.0	2.6	2466	2888	3398	-27.385	-33.623	Peak Center found at (59112);Inject Sample No 21
21	naxos-3	120	85901	05/28/21	22:12:24	5	209.8	20.224	1.6	1.9	2.6	4744	5720	6702	2.209	-7.748	Peak Center found at (59112);Inject Sample No 21
21	naxos-3	120	85901	05/28/21	22:12:24	6	269.6	20.252	2.3	2.7	3.4	4759	5737	6722	2.324	-7.258	Peak Center found at (59112);Inject Sample No 21
21	naxos-3	120	85901	05/28/21	22:12:24	7	329.4	19.444	2.5	2.9	3.8	4566	5505	6460	2.424	-7.316	Peak Center found at (59112);Inject Sample No 21
21	naxos-3	120	85901	05/28/21	22:12:24	8	388.9	18.736	2.5	3.0	3.9	4414	5322	6231	2.391	-7.267	Peak Center found at (59112);Inject Sample No 21
21	naxos-3	120	85901	05/28/21	22:12:24	9	448.7	17.979	2.6	3.1	3.9	4234	5104	5983	2.391	-7.231	Peak Center found at (59112);Inject Sample No 21
21	naxos-3	120	85901	05/28/21	22:12:24	10	508.3	17.292	2.6	3.1	3.9	4072	4910	5757	2.329	-7.276	Peak Center found at (59112);Inject Sample No 21
22	SG-126-11	66	85902	05/28/21	22:25:01	1	27.2	44.526	1.5	1.7	2.3	2462	2884	3392	-27.224	-33.577	Peak Center found at (59112);Inject Sample No 22
22	SG-126-11	66	85902	05/28/21	22:25:01	2	72.9	44.826	1.7	2.1	2.6	2459	2881	3388	-27.322	-33.619	Peak Center found at (59112);Inject Sample No 22
22	SG-126-11	66	85902	05/28/21	22:25:01	3	118.7	44.986	1.8	2.1	2.7	2467	2889	3399	-27.35	-33.6	Peak Center found at (59112);Inject Sample No 22
22	SG-126-11	66	85902	05/28/21	22:25:01	4	164.5	44.898	1.8	2.1	2.8	2461	2883	3391	-27.338	-33.61	Peak Center found at (59112);Inject Sample No 22
22	SG-126-11	66	85902	05/28/21	22:25:01	5	209.8	9.19	1.7	2.0	2.6	2153	2591	3068	0.296	-0.064	Peak Center found at (59112);Inject Sample No 22
22	SG-126-11	66	85902	05/28/21	22:25:01	6	269.6	9.137	1.9	2.2	2.9	2152	2590	3061	0.518	0.225	Peak Center found at (59112);Inject Sample No 22
22	SG-126-11	66	85902	05/28/21	22:25:01	7	329.4	8.764	1.9	2.3	2.9	2066	2486	2944	0.471	0.331	Peak Center found at (59112);Inject Sample No 22
22	SG-126-11	66	85902	05/28/21	22:25:01	8	388.9	8.372	1.9	2.3	2.9	1977	2380	2816	0.441	0.364	Peak Center found at (59112);Inject Sample No 22
22	SG-126-11	66	85902	05/28/21	22:25:01	9	448.7	8.062	1.9	2.3	3.0	1904	2292	2710	0.491	0.387	Peak Center found at (59112);Inject Sample No 22
22	SG-126-11	66	85902	05/28/21	22:25:01	10	508.5	7.727	1.9	2.3	3.0	1824	2194	2600	0.409	0.332	Peak Center found at (59112);Inject Sample No 22
23	SG-126-12	62	85903	05/28/21	22:37:40	1	27.2	44.555	1.3	1.6	2.1	2462	2883	3392	-27.271	-33.63	Peak Center found at (59112);Inject Sample No 23
23	SG-126-12	62	85903	05/28/21	22:37:40	2	72.9	44.802	1.6	1.9	2.5	2463	2885	3393	-27.351	-33.606	Peak Center found at (59112);Inject Sample No 23
23	SG-126-12	62	85903	05/28/21	22:37:40	3	118.7	44.922	1.7	2.0	2.6	2471	2894	3404	-27.35	-33.6	Peak Center found at (59112);Inject Sample No 23
23	SG-126-12	62	85903	05/28/21	22:37:40	4	164.5	44.901	1.7	2.0	2.6	2464	2886	3396	-27.38	-33.625	Peak Center found at (59112);Inject Sample No 23
23	SG-126-12	62	85903	05/28/21	22:37:40	5	209.8	8.226	1.6	1.9	2.5	1933	2326	2755	0.251	0.265	Peak Center found at (59112);Inject Sample No 23
23	SG-126-12	62	85903	05/28/21	22:37:40	6	269.6	8.209	1.8	2.1	2.7	1937	2331	2756	0.33	0.801	Peak Center found at (59112);Inject Sample No 23
23	SG-126-12	62	85903	05/28/21	22:37:40	7	329.4	7.894	1.8	2.2	2.9	1864	2243	2657	0.363	0.685	Peak Center found at (59112);Inject Sample No 23
23	SG-126-12	62	85903	05/28/21	22:37:40	8	388.9	7.566	1.8	2.2	2.8	1789	2153	2550	0.351	0.719	Peak Center found at (59112);Inject Sample No 23
23	SG-126-12	62	85903	05/28/21	22:37:40	9	448.7	7.283	1.8	2.2	2.9	1723	2073	2450	0.398	0.591	Peak Center found at (59112);Inject Sample No 23
23	SG-126-12	62	85903	05/28/21	22:37:40	10	508.5	7.018	1.8	2.2	2.8	1659	1997	2364	0.384	0.803	Peak Center found at (59112);Inject Sample No 23
24	SG-126-13	71	85904	05/28/21	22:50:17	1	27.2	44.606	1.3	1.6	2.1	2462	2883	3391	-27.242	-33.544	Peak Center found at (59112);Inject Sample No 24
24	SG-126-13	71	85904	05/28/21	22:50:17	2	72.9	44.788	1.6	1.9	2.4	2466	2888	3397	-27.326	-33.554	Peak Center found at (59112);Inject Sample No 24
24	SG-126-13	71	85904	05/28/21	22:50:17	3	118.7	44.835	1.7	2.0	2.6	2462	2884	3392	-27.35	-33.6	Peak Center found at (59112);Inject Sample No 24
24	SG-126-13	71	85904	05/28/21	22:50:17	4	164.5	44.744	1.7	2.0	2.6	2460	2881	3390	-27.348	-33.554	Peak Center found at (59112);Inject Sample No 24
24	SG-126-13	71	85904	05/28/21	22:50:17	5	209.8	11.825	1.6	1.9	2.5	2780	3344	3956	-0.183	-0.032	Peak Center found at (59112);Inject Sample No 24
24	SG-126-13	71	85904	05/28/21	22:50:17	6	269.6	11.888	1.9	2.3	2.9	2802	3371	3987	0.08	0.32	Peak Center found at (59112);Inject Sample No 24
24	SG-126-13	71	85904	05/28/21	22:50:17	7	329.4	11.354	2.0	2.4	3.1	2680	3224	3816	0.007	0.229	Peak Center found at (59112);Inject Sample No 24
24	SG-126-13	71	85904	05/28/21	22:50:17	8	389.2	10.905	2.1	2.4	3.1	2573	3095	3667	0.01	0.375	Peak Center found at (59112);Inject Sample No 24
24	SG-126-13	71	85904	05/28/21	22:50:17	9	448.7	10.49	2.1	2.4	3.2	2478	2981	3525	0.042	0.299	Peak Center found at (59112);Inject Sample No 24
24	SG-126-13	71	85904	05/28/21	22:50:17	10	508.5	10.099	2.1	2.4	3.1	2384	2868	3396	0.082	0.324	Peak Center found at (59112);Inject Sample No 24
25	SG-126-14	89	85905	05/28/21	23:02:55	1	27.2	44.58	1.3	1.6	2.1	2464	2886	3394	-27.264	-33.551	Peak Center found at (59112);Inject Sample No 25
25	SG-126-14	89	85905	05/28/21	23:02:55	2	72.9	44.686	1.6	1.9	2.5	2458	2879	3387	-27.345	-33.585	Peak Center found at (59112);Inject Sample No 25
25	SG-126-14	89	85905	05/28/21	23:02:55	3	118.7	44.76	1.7	2.0	2.5	2460	2880	3389	-27.35	-33.6	Peak Center found at (59112);Inject Sample No 25
25	SG-126-14	89	85905	05/28/21	23:02:55	4	164.5	44.792	1.7	2.0	2.6	2458	2878	3386	-27.364	-33.601	Peak Center found at (59112);Inject Sample No 25
25	SG-126-14	89	85905	05/28/21	23:02:55	5	209.8	15.254	1.6	1.9	2.5	3569	4298	5088	0.789	0.301	Peak Center found at (59112);Inject Sample No 25
25	SG-126-14	89	85905	05/28/21	23:02:55	6	269.6	15.233	2.1	2.5	3.2	3578	4309	5092	0.97	0.726	Peak Center found at (59112);Inject Sample No 25
25	SG-126-14	89	85905	05/28/21	23:02:55	7	329.4	14.562	2.2	2.6	3.4	3428	4128	4885	0.954	0.747	Peak Center found at (59112);Inject Sample No 25
25	SG-126-14	89	85905	05/28/21	23:02:55	8	388.9	13.983	2.3	2.7	3.5	3294	3966	4696	0.904	0.671	Peak Center found at (59112);Inject Sample No 25
25	SG-126-14	89	85905	05/28/21	23:02:55	9	448.7	13.474	2.3	2.7	3.5	3180	3829	4527	0.959	0.744	Peak Center found at (59112);Inject Sample No 25
25	SG-126-14	89	85905	05/28/21	23:02:55	10	508.5	12.952	2.3	2.7	3.4	3055	3678	4354	0.895	0.698	Peak Center found at (59112);Inject Sample No 25
26	SG-126-15	64	85906	05/28/21	23:15:32	1	27.2	44.403	1.4	1.6	2.1	2456	2877	3383	-27.26	-33.537	Peak Center found at (59112);Inject Sample No 26
26	SG-126-15	64	85906	05/28/21	23:15:32	2	72.9	44.705	1.6	2.0	2.6	2453	2873	3380	-27.331	-33.572	Peak Center found at (59112);Inject Sample No 26
26	SG-126-15	64	85906	05/28/21	23:15:32	3	118.7	44.79	1.7	2.0	2.6	2462	2884	3392	-27.35	-33.6	Peak Center found at (59112);Inject Sample No 26
26	SG-126-15	64	85906	05/28/21	23:15:32	4	164.5	44.837	1.7	2.1	2.7	2462	2884	3392	-27.383	-33.589	Peak Center found at (59112);Inject Sample No 26
26	SG-126-15	64	85906	05/28/21	23:15:32	5	210	5.01	1.6	1.9	2.5	1180	1420	1680	0.915	0.105	Peak Center found at (59112);Inject Sample No 26
26	SG-126-15	64	85906	05/28/21	23:15:32	6	269.6	4.977	1.6	1.9	2.5	1177	1417	1673	1.05	0.628	Peak Center found at (59112);Inject Sample No 26
26	SG-126-15	64	85906	05/28/21	23:15:32	7	329.4	4.758	1.6	2.0	2.6	1127	1357	1605	0.971	0.329	Peak Center found at (59112);Inject Sample No 26
26	SG-126-15	64	85906	05/28/21	23:15:32	8	389.2	4.569	1.6	1.9	2.6	1082	1302	1543	0.998	0.481	Peak Center found at (59112);Inject Sample No 26
26	SG-126-15	64	85906	05/28/21	23:15:32	9	448.7	4.391	1.6	1.9	2.5	1041	1254	1481	1.019	0.629	Peak Center found at (59112);Inject Sample No 26
26	SG-126-15	64	85906	05/28/21	23:15:32	10	508.5	4.218	1.6	1.9	2.5	1000	1204	1424	1.095	0.532	Peak Center found at (59112);Inject Sample No 26
27	SG-126-16	79	85907	05/28/21	23:28:11	1	27.2	44.438	1.2	1.5	1.9	2455	2877	3385	-27.268	-33.55	Peak Center found at (59117);Inject Sample No 27
27	SG-126-16	79	85907	05/28/21	23:28:11	2	72.9	44.738	1.5	1.8	2.4	2456	2878	3385	-27.301	-33.58	Peak Center found at (59117);Inject Sample No 27
27	SG-126-16	79	85907	05/28/21	23:28:11	3	118.7	44.798	1.6	1.9	2.5	2460	2882	3391	-27.35	-33.6	Peak Center found at (59117);Inject Sample No 27
27	SG-126-16	79	85907	05/28/21	23:28:11	4	164.5	44.78	1.6	1.9	2.5	2463	2886	3394	-27.333	-33.558	Peak Center found at (59117);Inject Sample No 27
27	SG-126-16	79	85907	05/28/21	23:28:11	5	210	13.547	1.6	1.9	2.4	3167	3816	4527	1.166	2.271	Peak Center found at (59117);Inject Sample No 27
27	SG-126-16	79	85907	05/28/21	23:28:11	6	269.6	13.498	1.9	2.3	3.0	3174	3826	4526	1.352	2.522	Peak Center found at (59117);Inject Sample No 27
27	SG-126-16	79	85907	05/28/21	23:28:11	7	329.4	12.919	2.1	2.5	3.2	3046	3670	4349	1.285	2.498	Peak Center found at (59117);Inject Sample No 27
27	SG-126-16	79	85907	05/28/21	23:28:11	8	389.2	12.459	2.1	2.6	3.2	2938	3539	4199	1.152	2.553	Peak Center found at (59117);Inject Sample No 27
27	SG-126-16	79	85907	05/28/21	23:28:11	9	448.7	11.995	2.1	2.5	3.3	2831	3412	4037	1.188	2.418	Peak Center found at (59117);Inject Sample No 27
27	SG-126-16	79	85907	05/28/21	23:28:11	10	508.5	11.524	2.1	2.5	3.3	2721	3278	3884	1.182	2.457	Peak Center found at (59117);Inject Sample No 27
28	SG-126-17	118	85908	05/28/21	23:40:47	1	27.2	44.596	1.3	1.6	2.1	2471	2894	3405	-27.261	-33.57	Peak Center found at (59117);Inject Sample No 28
28	SG-126-17	118	85908	05/28/21	23:40:47	2	72.9	44.933	1.6	1.9	2.5	2466	2888	3398	-27.312	-33.6	Peak Center found at (59117);Inject Sample No 28
28	SG-126-17	118	85908	05/28/21	23:40:47	3	118.7	44.932	1.7	2.0	2.5	2470	2893	3404	-27.35	-33.6	Peak Center found at (59117);Inject Sample No 28
28	SG-126-17	118	85908	05/28/21	23:40:47	4	164.5	44.975	1.7	2.0	2.6	2468	2891	3401	-27.37	-33.581	Peak Center found at (59117);Inject Sample No 28
28	SG-126-17	118	85908	05/28/21	23:40:47	5	209.8	20.899	1.6	1.9	2.5	4882	5882	6964	1.076	1.723	Peak Center found at (59117);Inject Sample No 28
28	SG-126-17	118	85908	05/28/21	23:40:47	6	269.6	20.898	2.3	2.7	3.5	4907	5912	6999	1.214	2.121	Peak Center found at (59117);Inject Sample No 28
28	SG-126-17	118	85908	05/28/21	23:40:47	7	329.4	19.953	2.5	3.0	3.8	4692	5653	6700	1.169	2.134	Peak Center found at (59117);Inject Sample No 28
28	SG-126-17	118	85908	05/28/21	23:40:47	8	388.9	19.134	2.6	3.1	3.9	4508	5432	6433	1.207	2.07	Peak Center found at (59117);Inject Sample No 28
28	SG-126-17	118	85908	05/28/21	23:40:47	9	448.7	18.367	2.6	3.1	3.9	4329	5216	6174	1.14	2.114	Peak Center found at (59117);Inject Sample No 28
28	SG-126-17	118	85908	05/28/21	23:40:47	10	508.5	17.682	2.6	3.1	3.9	4162	5014	5947	1.163	2.123	Peak Center found at (59117);Inject Sample No 28
29	SG-126-18	74	85909	05/28/21	23:53:25	1	27.2	44.572	1.4	1.7	2.2	2463	2885	3394	-27.295	-33.561	Peak Center found at (59117);Inject Sample No 29
29	SG-126-18	74	85909	05/28/21	23:53:25	2	72.9	44.949	1.7	2.0	2.6	2468	2891	3401	-27.367	-33.593	Peak Center found at (59117);Inject Sample No 29
29	SG-126-18	74	85909	05/28/21	23:53:25	3	118.7	44.893	1.7	2.1	2.7	2467	2890	3400	-27.35	-33.6	Peak Center found at (59117);Inject Sample No 29
29	SG-126-18	74	85909	05/28/21	23:53:25	4	164.5	44.95	1.7	2.1	2.6	2471	2894	3405	-27.356	-33.569	Peak Center found at (59117);Inject Sample No 29
29	SG-126-18	74	85909	05/28/21	23:53:25	5	209.8	11.953	1.6	1.9	2.6	2799	3370	3989	0.666	0.609	Peak Center found at (59117);Inject Sample No 29
29	SG-126-18	74	85909	05/28/21	23:53:25	6	269.6	11.9	1.9	2.3	2.9	2800	3371	3987	0.783	1.046	Peak Center found at (59117);Inject Sample No 29
29	SG-126-18	74	85909	05/28/21	23:53:25	7	329.4	11.403	2.0	2.4	3.1	2687	3235	3831	0.775	0.873	Peak Center found at (59117);Inject Sample No 29
29	SG-126-18	74	85909	05/28/21	23:53:25	8	388.9	10.907	2.1	2.5	3.2	2573	3099	3672	0.759	0.92	Peak Center found at (59117);Inject Sample No 29
29	SG-126-18	74	85909	05/28/21	23:53:25	9	448.7	10.476	2.1	2.4	3.1	2474	2980	3522	0.809	0.974	Peak Center found at (59117);Inject Sample No 29
29	SG-126-18	74	85909	05/28/21	23:53:25	10	508.5	10.09	2.0	2.5	3.2	2381	2867	3396	0.751	0.895	Peak Center found at (59117);Inject Sample No 29
30	naxos-4	84	85910	05/29/21	00:06:03	1	27.2	44.664	1.3	1.6	2.1	2469	2892	3402	-27.279	-33.616	Peak Center found at (59117);Inject Sample No 30
30	naxos-4	84	85910	05/29/21	00:06:03	2	72.9	44.878	1.6	1.9	2.5	2464	2886	3396	-27.359	-33.612	Peak Center found at (59117);Inject Sample No 30
30	naxos-4	84	85910	05/29/21	00:06:03	3	118.7	44.932	1.7	2.0	2.6	2470	2893	3404	-27.35	-33.6	Peak Center found at (59117);Inject Sample No 30
30	naxos-4	84	85910	05/29/21	00:06:03	4	164.5	44.973	1.7	2.0	2.6	2470	2893	3405	-27.381	-33.638	Peak Center found at (59117);Inject Sample No 30
30	naxos-4	84	85910	05/29/21	00:06:03	5	210	8.947	1.6	1.9	2.5	2089	2517	2953	2.224	-7.963	Peak Center found at (59117);Inject Sample No 30
30	naxos-4	84	85910	05/29/21	00:06:03	6	269.6	8.922	1.8	2.1	2.7	2097	2528	2959	2.323	-7.562	Peak Center found at (59117);Inject Sample No 30
30	naxos-4	84	85910	05/29/21	00:06:03	7	329.4	8.513	1.8	2.2	2.8	2005	2417	2835	2.318	-7.574	Peak Center found at (59117);Inject Sample No 30
30	naxos-4	84	85910	05/29/21	00:06:03	8	388.9	8.145	1.8	2.2	2.8	1922	2318	2717	2.335	-7.551	Peak Center found at (59117);Inject Sample No 30
30	naxos-4	84	85910	05/29/21	00:06:03	9	448.7	7.817	1.8	2.2	2.9	1848	2228	2608	2.413	-7.537	Peak Center found at (59117);Inject Sample No 30
30	naxos-4	84	85910	05/29/21	00:06:03	10	508.5	7.49	1.8	2.2	2.8	1771	2135	2505	2.346	-7.378	Peak Center found at (59117);Inject Sample No 30
31	Kiel Carbo b	75	85911	05/29/21	00:18:40	1	27.2	44.624	1.3	1.5	2.0	2470	2892	3402	-27.309	-33.628	Peak Center found at (59112);Inject Sample No 31
31	Kiel Carbo b	75	85911	05/29/21	00:18:40	2	72.9	44.946	1.6	1.9	2.5	2470	2892	3403	-27.366	-33.598	Peak Center found at (59112);Inject Sample No 31
31	Kiel Carbo b	75	85911	05/29/21	00:18:40	3	118.7	44.955	1.6	1.9	2.5	2470	2892	3402	-27.35	-33.6	Peak Center found at (59112);Inject Sample No 31
31	Kiel Carbo b	75	85911	05/29/21	00:18:40	4	164.5	44.987	1.7	2.0	2.6	2472	2895	3406	-27.376	-33.646	Peak Center found at (59112);Inject Sample No 31
31	Kiel Carbo b	75	85911	05/29/21	00:18:40	5	209.8	13.883	1.6	1.9	2.5	3252	3782	4550	-34.986	-16.92	Peak Center found at (59112);Inject Sample No 31
31	Kiel Carbo b	75	85911	05/29/21	00:18:40	6	269.6	13.898	2.0	2.3	3.1	3271	3804	4575	-34.859	-16.58	Peak Center found at (59112);Inject Sample No 31
31	Kiel Carbo b	75	85911	05/29/21	00:18:40	7	329.4	13.325	2.1	2.5	3.2	3141	3652	4398	-34.863	-16.457	Peak Center found at (59112);Inject Sample No 31
31	Kiel Carbo b	75	85911	05/29/21	00:18:40	8	388.9	12.775	2.1	2.5	3.2	3016	3508	4223	-34.872	-16.492	Peak Center found at (59112);Inject Sample No 31
31	Kiel Carbo b	75	85911	05/29/21	00:18:40	9	448.7	12.282	2.2	2.5	3.2	2903	3376	4060	-34.855	-16.437	Peak Center found at (59112);Inject Sample No 31
31	Kiel Carbo b	75	85911	05/29/21	00:18:40	10	508.5	11.809	2.1	2.5	3.3	2788	3241	3904	-34.881	-16.512	Peak Center found at (59112);Inject Sample No 31
32	SG-126-19	73	85912	05/29/21	00:31:17	1	27.2	44.645	1.3	1.6	2.1	2472	2896	3408	-27.261	-33.617	Peak Center found at (59117);Inject Sample No 32
32	SG-126-19	73	85912	05/29/21	00:31:17	2	72.9	44.911	1.6	1.9	2.4	2469	2892	3403	-27.337	-33.584	Peak Center found at (59117);Inject Sample No 32
32	SG-126-19	73	85912	05/29/21	00:31:17	3	118.7	44.938	1.7	2.0	2.6	2468	2891	3401	-27.35	-33.6	Peak Center found at (59117);Inject Sample No 32
32	SG-126-19	73	85912	05/29/21	00:31:17	4	164.5	44.967	1.7	2.0	2.6	2470	2894	3404	-27.389	-33.653	Peak Center found at (59117);Inject Sample No 32
32	SG-126-19	73	85912	05/29/21	00:31:17	5	209.8	12.992	1.6	1.9	2.4	3030	3648	4316	0.346	0.05	Peak Center found at (59117);Inject Sample No 32
32	SG-126-19	73	85912	05/29/21	00:31:17	6	269.6	12.952	2.0	2.4	3.0	3042	3663	4329	0.425	0.394	Peak Center found at (59117);Inject Sample No 32
32	SG-126-19	73	85912	05/29/21	00:31:17	7	329.4	12.395	2.1	2.4	3.1	2917	3511	4157	0.545	0.433	Peak Center found at (59117);Inject Sample No 32
32	SG-126-19	73	85912	05/29/21	00:31:17	8	388.9	11.886	2.1	2.5	3.2	2802	3374	3990	0.534	0.571	Peak Center found at (59117);Inject Sample No 32
32	SG-126-19	73	85912	05/29/21	00:31:17	9	448.7	11.421	2.1	2.5	3.2	2695	3244	3837	0.492	0.483	Peak Center found at (59117);Inject Sample No 32
32	SG-126-19	73	85912	05/29/21	00:31:17	10	508.5	10.978	2.1	2.5	3.2	2588	3115	3690	0.501	0.439	Peak Center found at (59117);Inject Sample No 32
33	SG-126-20	72	85913	05/29/21	00:43:53	1	27.2	44.543	1.3	1.6	2.1	2464	2886	3396	-27.239	-33.602	Peak Center found at (59117);Inject Sample No 33
33	SG-126-20	72	85913	05/29/21	00:43:53	2	72.9	44.933	1.6	1.9	2.5	2468	2891	3402	-27.286	-33.594	Peak Center found at (59117);Inject Sample No 33
33	SG-126-20	72	85913	05/29/21	00:43:53	3	118.7	44.92	1.6	2.0	2.6	2466	2889	3399	-27.35	-33.6	Peak Center found at (59117);Inject Sample No 33
33	SG-126-20	72	85913	05/29/21	00:43:53	4	164.5	44.84	1.7	2.0	2.6	2460	2883	3391	-27.352	-33.645	Peak Center found at (59117);Inject Sample No 33
33	SG-126-20	72	85913	05/29/21	00:43:53	5	210	12.137	1.6	1.9	2.5	2846	3428	4056	0.982	-0.447	Peak Center found at (59117);Inject Sample No 33
33	SG-126-20	72	85913	05/29/21	00:43:53	6	269.6	12.151	1.9	2.3	3.0	2859	3444	4067	1.084	-0.011	Peak Center found at (59117);Inject Sample No 33
33	SG-126-20	72	85913	05/29/21	00:43:53	7	329.4	11.599	2.0	2.4	3.1	2733	3291	3892	1.095	0.012	Peak Center found at (59117);Inject Sample No 33
33	SG-126-20	72	85913	05/29/21	00:43:53	8	388.9	11.166	2.0	2.4	3.1	2631	3170	3747	1.097	-0.021	Peak Center found at (59117);Inject Sample No 33
33	SG-126-20	72	85913	05/29/21	00:43:53	9	448.7	10.728	2.0	2.4	3.1	2529	3046	3601	1.087	0.078	Peak Center found at (59117);Inject Sample No 33
33	SG-126-20	72	85913	05/29/21	00:43:53	10	508.3	10.312	2.0	2.4	3.2	2431	2928	3462	1.124	-0.033	Peak Center found at (59117);Inject Sample No 33
34	SG-126-21	66	85914	05/29/21	00:56:30	1	27.2	44.448	1.3	1.5	2.0	2458	2878	3385	-27.259	-33.515	Peak Center found at (59112);Inject Sample No 34
34	SG-126-21	66	85914	05/29/21	00:56:30	2	72.9	44.751	1.6	1.9	2.5	2460	2880	3388	-27.322	-33.612	Peak Center found at (59112);Inject Sample No 34
34	SG-126-21	66	85914	05/29/21	00:56:30	3	118.7	44.721	1.6	1.9	2.6	2457	2877	3384	-27.35	-33.6	Peak Center found at (59112);Inject Sample No 34
34	SG-126-21	66	85914	05/29/21	00:56:30	4	164.5	44.736	1.7	2.0	2.6	2459	2879	3387	-27.367	-33.596	Peak Center found at (59112);Inject Sample No 34
34	SG-126-21	66	85914	05/29/21	00:56:30	5	209.8	12.161	1.6	1.9	2.5	2856	3439	4060	1.162	-0.091	Peak Center found at (59112);Inject Sample No 34
34	SG-126-21	66	85914	05/29/21	00:56:30	6	269.6	12.164	1.9	2.3	3.0	2867	3451	4083	1.288	0.151	Peak Center found at (59112);Inject Sample No 34
34	SG-126-21	66	85914	05/29/21	00:56:30	7	329.2	11.673	2.0	2.4	3.1	2753	3315	3918	1.28	0.24	Peak Center found at (59112);Inject Sample No 34
34	SG-126-21	66	85914	05/29/21	00:56:30	8	388.9	11.203	2.0	2.4	3.1	2648	3188	3765	1.297	0.291	Peak Center found at (59112);Inject Sample No 34
34	SG-126-21	66	85914	05/29/21	00:56:30	9	448.7	10.769	2.0	2.4	3.2	2544	3063	3622	1.296	0.191	Peak Center found at (59112);Inject Sample No 34
34	SG-126-21	66	85914	05/29/21	00:56:30	10	508.3	10.375	2.0	2.4	3.2	2452	2952	3487	1.321	0.226	Peak Center found at (59112);Inject Sample No 34
35	SG-126-22	63	85915	05/29/21	01:09:07	1	27.2	44.623	1.3	1.5	2.0	2459	2880	3388	-27.265	-33.501	Peak Center found at (59117);Inject Sample No 35
35	SG-126-22	63	85915	05/29/21	01:09:07	2	72.9	44.763	1.6	1.9	2.5	2463	2885	3394	-27.321	-33.535	Peak Center found at (59117);Inject Sample No 35
35	SG-126-22	63	85915	05/29/21	01:09:07	3	118.7	44.76	1.6	2.0	2.6	2459	2881	3389	-27.35	-33.6	Peak Center found at (59117);Inject Sample No 35
35	SG-126-22	63	85915	05/29/21	01:09:07	4	164.5	44.67	1.7	2.0	2.6	2456	2877	3385	-27.373	-33.552	Peak Center found at (59117);Inject Sample No 35
35	SG-126-22	63	85915	05/29/21	01:09:07	5	209.8	11.353	1.6	1.9	2.5	2668	3213	3798	0.783	1.188	Peak Center found at (59117);Inject Sample No 35
35	SG-126-22	63	85915	05/29/21	01:09:07	6	269.6	11.35	1.8	2.2	2.8	2673	3218	3812	0.916	1.619	Peak Center found at (59117);Inject Sample No 35
35	SG-126-22	63	85915	05/29/21	01:09:07	7	329.2	10.866	1.9	2.3	3.0	2560	3083	3655	0.967	1.575	Peak Center found at (59117);Inject Sample No 35
35	SG-126-22	63	85915	05/29/21	01:09:07	8	388.9	10.431	2.0	2.4	3.0	2465	2969	3510	0.893	1.653	Peak Center found at (59117);Inject Sample No 35
35	SG-126-22	63	85915	05/29/21	01:09:07	9	448.7	10.008	2.0	2.4	3.1	2367	2850	3374	0.895	1.636	Peak Center found at (59117);Inject Sample No 35
35	SG-126-22	63	85915	05/29/21	01:09:07	10	508.3	9.617	2.0	2.4	3.0	2271	2735	3238	0.901	1.618	Peak Center found at (59117);Inject Sample No 35
36	SG-126-23	90	85916	05/29/21	01:21:43	1	27.2	44.539	1.3	1.5	2.1	2458	2880	3388	-27.267	-33.578	Peak Center found at (59117);Inject Sample No 36
36	SG-126-23	90	85916	05/29/21	01:21:43	2	72.9	44.838	1.6	1.9	2.4	2463	2885	3394	-27.329	-33.561	Peak Center found at (59117);Inject Sample No 36
36	SG-126-23	90	85916	05/29/21	01:21:43	3	118.7	44.734	1.6	2.0	2.6	2457	2878	3386	-27.35	-33.6	Peak Center found at (59117);Inject Sample No 36
36	SG-126-23	90	85916	05/29/21	01:21:43	4	164.5	44.724	1.6	2.0	2.5	2456	2878	3385	-27.347	-33.556	Peak Center found at (59117);Inject Sample No 36
36	SG-126-23	90	85916	05/29/21	01:21:43	5	209.8	14.511	1.6	1.9	2.5	3401	4096	4844	1.033	1.405	Peak Center found at (59117);Inject Sample No 36
36	SG-126-23	90	85916	05/29/21	01:21:43	6	269.6	14.507	2.0	2.4	3.1	3411	4109	4865	1.173	1.866	Peak Center found at (59117);Inject Sample No 36
36	SG-126-23	90	85916	05/29/21	01:21:43	7	329.4	13.91	2.1	2.5	3.3	3269	3938	4668	1.198	1.773	Peak Center found at (59117);Inject Sample No 36
36	SG-126-23	90	85916	05/29/21	01:21:43	8	388.9	13.359	2.2	2.6	3.4	3147	3791	4482	1.192	1.726	Peak Center found at (59117);Inject Sample No 36
36	SG-126-23	90	85916	05/29/21	01:21:43	9	448.7	12.839	2.2	2.6	3.3	3028	3647	4319	1.206	1.784	Peak Center found at (59117);Inject Sample No 36
36	SG-126-23	90	85916	05/29/21	01:21:43	10	508.3	12.339	2.2	2.6	3.4	2908	3503	4152	1.199	1.779	Peak Center found at (59117);Inject Sample No 36
37	SG-126-24	78	85917	05/29/21	01:34:21	1	27.2	44.486	1.3	1.6	2.1	2452	2872	3379	-27.292	-33.585	Peak Center found at (59117);Inject Sample No 37
37	SG-126-24	78	85917	05/29/21	01:34:21	2	72.9	44.728	1.6	1.9	2.5	2457	2878	3386	-27.314	-33.577	Peak Center found at (59117);Inject Sample No 37
37	SG-126-24	78	85917	05/29/21	01:34:21	3	118.7	44.74	1.6	2.0	2.6	2457	2877	3386	-27.35	-33.6	Peak Center found at (59117);Inject Sample No 37
37	SG-126-24	78	85917	05/29/21	01:34:21	4	164.5	44.711	1.7	2.0	2.6	2458	2880	3388	-27.367	-33.611	Peak Center found at (59117);Inject Sample No 37
37	SG-126-24	78	85917	05/29/21	01:34:21	5	209.8	12.467	1.6	1.9	2.5	2931	3532	4173	1.427	1.071	Peak Center found at (59117);Inject Sample No 37
37	SG-126-24	78	85917	05/29/21	01:34:21	6	269.6	12.5	1.9	2.3	3.0	2940	3543	4191	1.59	1.393	Peak Center found at (59117);Inject Sample No 37
37	SG-126-24	78	85917	05/29/21	01:34:21	7	329.4	11.976	2.0	2.4	3.1	2818	3395	4024	1.58	1.55	Peak Center found at (59117);Inject Sample No 37
37	SG-126-24	78	85917	05/29/21	01:34:21	8	388.9	11.49	2.0	2.5	3.2	2711	3266	3860	1.516	1.391	Peak Center found at (59117);Inject Sample No 37
37	SG-126-24	78	85917	05/29/21	01:34:21	9	448.7	11.072	2.0	2.4	3.2	2612	3147	3724	1.603	1.459	Peak Center found at (59117);Inject Sample No 37
37	SG-126-24	78	85917	05/29/21	01:34:21	10	508.3	10.625	2.0	2.4	3.2	2509	3023	3580	1.631	1.457	Peak Center found at (59117);Inject Sample No 37
38	SG-126-25	116	85918	05/29/21	01:47:02	1	27.2	44.498	1.3	1.6	2.1	2463	2885	3394	-27.282	-33.572	Peak Center found at (59117);Inject Sample No 38
38	SG-126-25	116	85918	05/29/21	01:47:02	2	72.9	44.732	1.6	1.9	2.5	2458	2879	3387	-27.283	-33.598	Peak Center found at (59117);Inject Sample No 38
38	SG-126-25	116	85918	05/29/21	01:47:02	3	118.7	44.794	1.6	1.9	2.6	2461	2884	3392	-27.35	-33.6	Peak Center found at (59117);Inject Sample No 38
38	SG-126-25	116	85918	05/29/21	01:47:02	4	164.5	44.801	1.7	2.0	2.6	2458	2879	3386	-27.362	-33.612	Peak Center found at (59117);Inject Sample No 38
38	SG-126-25	116	85918	05/29/21	01:47:02	5	209.8	14.743	1.6	1.9	2.5	3452	4160	4914	1.402	0.569	Peak Center found at (59117);Inject Sample No 38
38	SG-126-25	116	85918	05/29/21	01:47:02	6	269.6	14.773	2.0	2.4	3.2	3469	4180	4939	1.573	0.931	Peak Center found at (59117);Inject Sample No 38
38	SG-126-25	116	85918	05/29/21	01:47:02	7	329.4	14.166	2.1	2.6	3.3	3328	4010	4746	1.61	1.12	Peak Center found at (59117);Inject Sample No 38
38	SG-126-25	116	85918	05/29/21	01:47:02	8	388.9	13.57	2.2	2.6	3.3	3194	3850	4549	1.591	1.037	Peak Center found at (59117);Inject Sample No 38
38	SG-126-25	116	85918	05/29/21	01:47:02	9	448.7	13.03	2.2	2.6	3.4	3078	3709	4387	1.605	1.108	Peak Center found at (59117);Inject Sample No 38
38	SG-126-25	116	85918	05/29/21	01:47:02	10	508.3	12.498	2.2	2.6	3.4	2954	3560	4208	1.623	1.086	Peak Center found at (59117);Inject Sample No 38
39	naxos-5	125	85919	05/29/21	01:59:37	1	27.2	44.503	1.3	1.6	2.1	2459	2881	3389	-27.267	-33.566	Peak Center found at (59117);Inject Sample No 39
39	naxos-5	125	85919	05/29/21	01:59:37	2	72.9	44.769	1.6	1.9	2.6	2464	2886	3395	-27.333	-33.588	Peak Center found at (59117);Inject Sample No 39
39	naxos-5	125	85919	05/29/21	01:59:37	3	118.7	44.801	1.7	2.0	2.6	2458	2879	3387	-27.35	-33.6	Peak Center found at (59117);Inject Sample No 39
39	naxos-5	125	85919	05/29/21	01:59:37	4	164.5	44.836	1.7	2.0	2.7	2463	2885	3394	-27.343	-33.604	Peak Center found at (59117);Inject Sample No 39
39	naxos-5	125	85919	05/29/21	01:59:37	5	209.8	19.722	1.6	1.9	2.5	4599	5546	6501	2.294	-7.583	Peak Center found at (59117);Inject Sample No 39
39	naxos-5	125	85919	05/29/21	01:59:37	6	269.6	19.723	2.2	2.7	3.4	4620	5570	6526	2.373	-7.246	Peak Center found at (59117);Inject Sample No 39
39	naxos-5	125	85919	05/29/21	01:59:37	7	329.4	18.852	2.4	2.9	3.7	4428	5338	6261	2.438	-7.27	Peak Center found at (59117);Inject Sample No 39
39	naxos-5	125	85919	05/29/21	01:59:37	8	388.9	18.04	2.5	3.0	3.8	4250	5126	6009	2.495	-7.293	Peak Center found at (59117);Inject Sample No 39
39	naxos-5	125	85919	05/29/21	01:59:37	9	448.7	17.307	2.5	3.0	3.8	4086	4927	5775	2.456	-7.242	Peak Center found at (59117);Inject Sample No 39
39	naxos-5	125	85919	05/29/21	01:59:37	10	508.3	16.644	2.5	3.0	3.8	3926	4734	5553	2.427	-7.222	Peak Center found at (59117);Inject Sample No 39
40	SG-126-26	79	85920	05/29/21	02:12:15	1	27.2	44.542	1.4	1.6	2.2	2460	2882	3390	-27.228	-33.561	Peak Center found at (59117);Inject Sample No 40
40	SG-126-26	79	85920	05/29/21	02:12:15	2	72.9	44.761	1.7	2.0	2.6	2458	2879	3388	-27.287	-33.603	Peak Center found at (59117);Inject Sample No 40
40	SG-126-26	79	85920	05/29/21	02:12:15	3	118.7	44.774	1.7	2.0	2.6	2461	2883	3392	-27.35	-33.6	Peak Center found at (59117);Inject Sample No 40
40	SG-126-26	79	85920	05/29/21	02:12:15	4	164.5	44.753	1.7	2.0	2.6	2460	2882	3390	-27.335	-33.594	Peak Center found at (59117);Inject Sample No 40
40	SG-126-26	79	85920	05/29/21	02:12:15	5	209.8	13.036	1.6	1.9	2.6	3065	3693	4360	1.542	0.024	Peak Center found at (59117);Inject Sample No 40
40	SG-126-26	79	85920	05/29/21	02:12:15	6	269.6	13.024	2.0	2.4	3.1	3071	3700	4372	1.616	0.489	Peak Center found at (59117);Inject Sample No 40
40	SG-126-26	79	85920	05/29/21	02:12:15	7	329.4	12.536	2.1	2.5	3.3	2957	3562	4215	1.612	0.421	Peak Center found at (59117);Inject Sample No 40
40	SG-126-26	79	85920	05/29/21	02:12:15	8	388.9	11.988	2.1	2.6	3.3	2833	3415	4033	1.634	0.445	Peak Center found at (59117);Inject Sample No 40
40	SG-126-26	79	85920	05/29/21	02:12:15	9	448.7	11.55	2.1	2.6	3.3	2730	3290	3889	1.675	0.608	Peak Center found at (59117);Inject Sample No 40
40	SG-126-26	79	85920	05/29/21	02:12:15	10	508.3	11.121	2.1	2.5	3.3	2626	3165	3743	1.687	0.434	Peak Center found at (59117);Inject Sample No 40
41	SG-126-27	90	85921	05/29/21	02:24:51	1	27.2	44.534	1.3	1.6	2.1	2458	2879	3387	-27.25	-33.485	Peak Center found at (59117);Inject Sample No 41
41	SG-126-27	90	85921	05/29/21	02:24:51	2	72.9	44.75	1.6	1.9	2.6	2458	2880	3387	-27.301	-33.56	Peak Center found at (59117);Inject Sample No 41
41	SG-126-27	90	85921	05/29/21	02:24:51	3	118.7	44.786	1.7	2.0	2.6	2461	2883	3391	-27.35	-33.6	Peak Center found at (59117);Inject Sample No 41
41	SG-126-27	90	85921	05/29/21	02:24:51	4	164.5	44.772	1.7	2.0	2.6	2458	2879	3386	-27.378	-33.521	Peak Center found at (59117);Inject Sample No 41
41	SG-126-27	90	85921	05/29/21	02:24:51	5	209.8	10.815	1.6	1.9	2.6	2541	3061	3617	1.39	-0.192	Peak Center found at (59117);Inject Sample No 41
41	SG-126-27	90	85921	05/29/21	02:24:51	6	269.6	10.827	1.9	2.3	2.9	2550	3072	3629	1.62	0.246	Peak Center found at (59117);Inject Sample No 41
41	SG-126-27	90	85921	05/29/21	02:24:51	7	329.4	10.387	2.0	2.4	3.1	2449	2951	3491	1.593	0.17	Peak Center found at (59117);Inject Sample No 41
41	SG-126-27	90	85921	05/29/21	02:24:51	8	388.9	9.959	2.0	2.4	3.1	2355	2838	3352	1.597	0.16	Peak Center found at (59117);Inject Sample No 41
41	SG-126-27	90	85921	05/29/21	02:24:51	9	448.7	9.596	2.0	2.4	3.1	2272	2738	3235	1.589	0.185	Peak Center found at (59117);Inject Sample No 41
41	SG-126-27	90	85921	05/29/21	02:24:51	10	508.5	9.233	2.0	2.4	3.1	2182	2628	3110	1.63	0.271	Peak Center found at (59117);Inject Sample No 41
42	SG-126-28	90	85922	05/29/21	02:37:28	1	27.2	44.499	1.3	1.6	2.1	2459	2881	3389	-27.256	-33.597	Peak Center found at (59117);Inject Sample No 42
42	SG-126-28	90	85922	05/29/21	02:37:28	2	72.9	44.729	1.6	1.9	2.5	2461	2883	3391	-27.303	-33.623	Peak Center found at (59117);Inject Sample No 42
42	SG-126-28	90	85922	05/29/21	02:37:28	3	118.7	44.783	1.6	2.0	2.6	2460	2881	3389	-27.35	-33.6	Peak Center found at (59117);Inject Sample No 42
42	SG-126-28	90	85922	05/29/21	02:37:28	4	164.5	44.751	1.7	2.0	2.6	2455	2875	3382	-27.312	-33.577	Peak Center found at (59117);Inject Sample No 42
42	SG-126-28	90	85922	05/29/21	02:37:28	5	209.8	13.652	1.6	1.9	2.6	3205	3861	4558	1.059	-0.551	Peak Center found at (59117);Inject Sample No 42
42	SG-126-28	90	85922	05/29/21	02:37:28	6	269.6	13.669	2.0	2.4	3.1	3214	3872	4571	1.215	-0.117	Peak Center found at (59117);Inject Sample No 42
42	SG-126-28	90	85922	05/29/21	02:37:28	7	329.4	13.153	2.1	2.5	3.2	3093	3725	4404	1.25	-0.034	Peak Center found at (59117);Inject Sample No 42
42	SG-126-28	90	85922	05/29/21	02:37:28	8	388.9	12.587	2.1	2.6	3.3	2970	3577	4231	1.297	-0.053	Peak Center found at (59117);Inject Sample No 42
42	SG-126-28	90	85922	05/29/21	02:37:28	9	448.7	12.102	2.1	2.6	3.3	2863	3448	4074	1.215	-0.011	Peak Center found at (59117);Inject Sample No 42
42	SG-126-28	90	85922	05/29/21	02:37:28	10	508.3	11.591	2.1	2.6	3.3	2738	3298	3902	1.27	-0.022	Peak Center found at (59117);Inject Sample No 42
43	SG-126-29	89	85923	05/29/21	02:50:06	1	27.2	44.566	1.3	1.6	2.1	2467	2889	3399	-27.282	-33.553	Peak Center found at (59117);Inject Sample No 43
43	SG-126-29	89	85923	05/29/21	02:50:06	2	72.9	44.839	1.6	1.9	2.5	2464	2886	3395	-27.35	-33.576	Peak Center found at (59117);Inject Sample No 43
43	SG-126-29	89	85923	05/29/21	02:50:06	3	118.7	44.773	1.7	2.0	2.6	2459	2880	3389	-27.35	-33.6	Peak Center found at (59117);Inject Sample No 43
43	SG-126-29	89	85923	05/29/21	02:50:06	4	164.5	44.768	1.7	2.0	2.7	2466	2888	3397	-27.384	-33.602	Peak Center found at (59117);Inject Sample No 43
43	SG-126-29	89	85923	05/29/21	02:50:06	5	210	15.494	1.6	1.9	2.5	3612	4348	5152	0.63	0.774	Peak Center found at (59117);Inject Sample No 43
43	SG-126-29	89	85923	05/29/21	02:50:06	6	269.6	15.491	2.1	2.5	3.2	3630	4371	5171	0.775	1.135	Peak Center found at (59117);Inject Sample No 43
43	SG-126-29	89	85923	05/29/21	02:50:06	7	329.4	14.828	2.2	2.7	3.4	3488	4200	4967	0.801	1.214	Peak Center found at (59117);Inject Sample No 43
43	SG-126-29	89	85923	05/29/21	02:50:06	8	389.2	14.192	2.2	2.7	3.5	3346	4028	4774	0.797	1.165	Peak Center found at (59117);Inject Sample No 43
43	SG-126-29	89	85923	05/29/21	02:50:06	9	448.7	13.63	2.2	2.7	3.5	3217	3874	4580	0.844	1.208	Peak Center found at (59117);Inject Sample No 43
43	SG-126-29	89	85923	05/29/21	02:50:06	10	508.5	13.102	2.2	2.7	3.5	3093	3724	4411	0.785	1.164	Peak Center found at (59117);Inject Sample No 43
44	SG-126-30	113	85924	05/29/21	03:02:43	1	27.2	44.439	1.4	1.6	2.2	2465	2887	3397	-27.267	-33.611	Peak Center found at (59117);Inject Sample No 44
44	SG-126-30	113	85924	05/29/21	03:02:43	2	72.9	44.79	1.6	1.9	2.6	2463	2886	3395	-27.338	-33.613	Peak Center found at (59117);Inject Sample No 44
44	SG-126-30	113	85924	05/29/21	03:02:43	3	118.7	44.824	1.7	2.0	2.6	2463	2885	3394	-27.35	-33.6	Peak Center found at (59117);Inject Sample No 44
44	SG-126-30	113	85924	05/29/21	03:02:43	4	164.5	44.882	1.7	2.0	2.7	2466	2888	3398	-27.412	-33.68	Peak Center found at (59117);Inject Sample No 44
44	SG-126-30	113	85924	05/29/21	03:02:43	5	209.8	20.216	1.6	1.9	2.6	4725	5692	6744	0.952	1.823	Peak Center found at (59117);Inject Sample No 44
44	SG-126-30	113	85924	05/29/21	03:02:43	6	269.6	20.264	2.3	2.7	3.6	4750	5721	6769	1.111	2.154	Peak Center found at (59117);Inject Sample No 44
44	SG-126-30	113	85924	05/29/21	03:02:43	7	329.4	19.44	2.5	3.0	3.9	4566	5500	6516	1.121	2.154	Peak Center found at (59117);Inject Sample No 44
44	SG-126-30	113	85924	05/29/21	03:02:43	8	388.9	18.64	2.5	3.1	3.9	4389	5288	6271	1.115	2.196	Peak Center found at (59117);Inject Sample No 44
44	SG-126-30	113	85924	05/29/21	03:02:43	9	448.7	17.908	2.6	3.1	3.9	4226	5090	6024	1.124	2.225	Peak Center found at (59117);Inject Sample No 44
44	SG-126-30	113	85924	05/29/21	03:02:43	10	508.5	17.189	2.6	3.1	3.9	4055	4883	5788	1.104	2.193	Peak Center found at (59117);Inject Sample No 44
45	SG-126-31	79	85925	05/29/21	03:15:21	1	27.2	44.618	1.4	1.7	2.2	2464	2886	3395	-27.276	-33.55	Peak Center found at (59117);Inject Sample No 45
45	SG-126-31	79	85925	05/29/21	03:15:21	2	72.9	44.862	1.7	2.0	2.6	2465	2887	3395	-27.339	-33.561	Peak Center found at (59117);Inject Sample No 45
45	SG-126-31	79	85925	05/29/21	03:15:21	3	118.7	44.823	1.7	2.1	2.7	2467	2889	3398	-27.35	-33.6	Peak Center found at (59117);Inject Sample No 45
45	SG-126-31	79	85925	05/29/21	03:15:21	4	164.5	44.791	1.7	2.1	2.7	2466	2888	3397	-27.396	-33.61	Peak Center found at (59117);Inject Sample No 45
45	SG-126-31	79	85925	05/29/21	03:15:21	5	210	13.086	1.6	2.0	2.6	3061	3687	4366	1.176	1.272	Peak Center found at (59117);Inject Sample No 45
45	SG-126-31	79	85925	05/29/21	03:15:21	6	269.6	13.084	2.0	2.4	3.1	3067	3695	4378	1.348	1.766	Peak Center found at (59117);Inject Sample No 45
45	SG-126-31	79	85925	05/29/21	03:15:21	7	329.4	12.557	2.1	2.5	3.3	2951	3555	4203	1.378	1.661	Peak Center found at (59117);Inject Sample No 45
45	SG-126-31	79	85925	05/29/21	03:15:21	8	389.2	12.022	2.1	2.6	3.4	2836	3417	4048	1.39	1.747	Peak Center found at (59117);Inject Sample No 45
45	SG-126-31	79	85925	05/29/21	03:15:21	9	448.7	11.558	2.1	2.6	3.3	2729	3288	3888	1.365	1.742	Peak Center found at (59117);Inject Sample No 45
45	SG-126-31	79	85925	05/29/21	03:15:21	10	508.5	11.13	2.1	2.6	3.3	2630	3168	3750	1.329	1.726	Peak Center found at (59117);Inject Sample No 45
46	SG-126-32	68	85926	05/29/21	03:28:00	1	27.2	44.507	1.3	1.6	2.1	2460	2881	3390	-27.292	-33.551	Peak Center found at (59117);Inject Sample No 46
46	SG-126-32	68	85926	05/29/21	03:28:00	2	72.9	44.785	1.6	2.0	2.6	2457	2877	3385	-27.355	-33.631	Peak Center found at (59117);Inject Sample No 46
46	SG-126-32	68	85926	05/29/21	03:28:00	3	118.7	44.772	1.7	2.0	2.7	2461	2882	3390	-27.35	-33.6	Peak Center found at (59117);Inject Sample No 46
46	SG-126-32	68	85926	05/29/21	03:28:00	4	164.5	44.819	1.7	2.0	2.7	2464	2885	3394	-27.358	-33.625	Peak Center found at (59117);Inject Sample No 46
46	SG-126-32	68	85926	05/29/21	03:28:00	5	210	9.71	1.6	1.9	2.6	2266	2729	3226	1.171	0.668	Peak Center found at (59117);Inject Sample No 46
46	SG-126-32	68	85926	05/29/21	03:28:00	6	269.8	9.702	1.8	2.2	2.9	2271	2736	3241	1.405	1.217	Peak Center found at (59117);Inject Sample No 46
46	SG-126-32	68	85926	05/29/21	03:28:00	7	329.4	9.272	1.9	2.3	3.0	2181	2628	3105	1.363	1.077	Peak Center found at (59117);Inject Sample No 46
46	SG-126-32	68	85926	05/29/21	03:28:00	8	389.2	8.873	1.9	2.3	3.0	2093	2521	2982	1.397	1.131	Peak Center found at (59117);Inject Sample No 46
46	SG-126-32	68	85926	05/29/21	03:28:00	9	448.7	8.509	1.9	2.3	3.0	2008	2419	2862	1.424	1.117	Peak Center found at (59117);Inject Sample No 46
46	SG-126-32	68	85926	05/29/21	03:28:00	10	508.5	8.19	1.9	2.3	3.0	1935	2330	2756	1.387	1.08	Peak Center found at (59117);Inject Sample No 46
47	SG-126-33	76	85927	05/29/21	03:40:36	1	27.2	44.47	1.3	1.5	2.1	2459	2881	3389	-27.264	-33.558	Peak Center found at (59117);Inject Sample No 47
47	SG-126-33	76	85927	05/29/21	03:40:36	2	72.9	44.745	1.6	1.9	2.5	2461	2882	3390	-27.334	-33.567	Peak Center found at (59117);Inject Sample No 47
47	SG-126-33	76	85927	05/29/21	03:40:36	3	118.7	44.771	1.6	2.0	2.6	2457	2878	3386	-27.35	-33.6	Peak Center found at (59117);Inject Sample No 47
47	SG-126-33	76	85927	05/29/21	03:40:36	4	164.5	44.73	1.7	2.0	2.6	2455	2875	3383	-27.397	-33.642	Peak Center found at (59117);Inject Sample No 47
47	SG-126-33	76	85927	05/29/21	03:40:36	5	210	10.53	1.6	1.9	2.6	2465	2967	3509	0.628	-0.202	Peak Center found at (59117);Inject Sample No 47
47	SG-126-33	76	85927	05/29/21	03:40:36	6	269.8	10.535	1.9	2.2	2.9	2471	2975	3522	0.826	0.188	Peak Center found at (59117);Inject Sample No 47
47	SG-126-33	76	85927	05/29/21	03:40:36	7	329.4	10.103	1.9	2.3	3.1	2377	2862	3380	0.791	0.162	Peak Center found at (59117);Inject Sample No 47
47	SG-126-33	76	85927	05/29/21	03:40:36	8	389.2	9.669	1.9	2.4	3.1	2283	2748	3252	0.819	0.307	Peak Center found at (59117);Inject Sample No 47
47	SG-126-33	76	85927	05/29/21	03:40:36	9	448.7	9.305	2.0	2.4	3.0	2199	2647	3130	0.783	0.336	Peak Center found at (59117);Inject Sample No 47
47	SG-126-33	76	85927	05/29/21	03:40:36	10	508.5	8.959	2.0	2.3	3.1	2118	2550	3014	0.859	0.284	Peak Center found at (59117);Inject Sample No 47
48	naxos-6	55	85928	05/29/21	03:53:15	1	27.2	44.392	1.3	1.6	2.1	2457	2878	3385	-27.267	-33.524	Peak Center found at (59117);Inject Sample No 48
48	naxos-6	55	85928	05/29/21	03:53:15	2	72.9	44.719	1.6	1.9	2.6	2460	2882	3389	-27.317	-33.567	Peak Center found at (59117);Inject Sample No 48
48	naxos-6	55	85928	05/29/21	03:53:15	3	118.7	44.748	1.7	2.0	2.6	2459	2880	3387	-27.35	-33.6	Peak Center found at (59117);Inject Sample No 48
48	naxos-6	55	85928	05/29/21	03:53:15	4	164.5	44.752	1.7	2.0	2.6	2457	2878	3386	-27.337	-33.558	Peak Center found at (59117);Inject Sample No 48
48	naxos-6	55	85928	05/29/21	03:53:15	5	210	30.702	1.6	1.9	2.6	7154	8624	10119	2.373	-7.515	Peak Center found at (59117);Inject Sample No 48
48	naxos-6	55	85928	05/29/21	03:53:15	6	269.6	30.774	2.7	3.3	4.1	7202	8686	10169	2.535	-7.188	Peak Center found at (59117);Inject Sample No 48
48	naxos-6	55	85928	05/29/21	03:53:15	7	329.4	29.465	3.0	3.7	4.6	6914	8336	9774	2.468	-7.196	Peak Center found at (59117);Inject Sample No 48
48	naxos-6	55	85928	05/29/21	03:53:15	8	389.2	28.351	3.2	3.8	4.8	6668	8039	9436	2.404	-7.3	Peak Center found at (59117);Inject Sample No 48
48	naxos-6	55	85928	05/29/21	03:53:15	9	448.7	27.274	3.2	3.8	4.8	6423	7744	9065	2.417	-7.252	Peak Center found at (59117);Inject Sample No 48
48	naxos-6	55	85928	05/29/21	03:53:15	10	508.5	26.23	3.2	3.9	4.9	6176	7446	8728	2.353	-7.292	Peak Center found at (59117);Inject Sample No 48
49	SG-126-34	60	85929	05/29/21	04:05:53	1	27.2	44.644	1.6	1.9	2.5	2467	2889	3399	-27.266	-33.558	Peak Center found at (59117);Inject Sample No 49
49	SG-126-34	60	85929	05/29/21	04:05:53	2	72.9	44.836	1.8	2.1	2.9	2465	2887	3396	-27.329	-33.604	Peak Center found at (59117);Inject Sample No 49
49	SG-126-34	60	85929	05/29/21	04:05:53	3	118.7	44.897	1.8	2.2	2.9	2464	2886	3394	-27.35	-33.6	Peak Center found at (59117);Inject Sample No 49
49	SG-126-34	60	85929	05/29/21	04:05:53	4	164.5	44.872	1.8	2.2	2.9	2468	2890	3400	-27.372	-33.629	Peak Center found at (59117);Inject Sample No 49
49	SG-126-34	60	85929	05/29/21	04:05:53	5	210	18.737	1.7	2.1	2.8	4383	5282	6193	2.234	-7.852	Peak Center found at (59117);Inject Sample No 49
49	SG-126-34	60	85929	05/29/21	04:05:53	6	269.6	18.675	2.3	2.8	3.6	4384	5286	6193	2.408	-7.42	Peak Center found at (59117);Inject Sample No 49
49	SG-126-34	60	85929	05/29/21	04:05:53	7	329.4	17.921	2.5	3.0	3.9	4218	5084	5955	2.378	-7.409	Peak Center found at (59117);Inject Sample No 49
49	SG-126-34	60	85929	05/29/21	04:05:53	8	389.2	17.148	2.5	3.1	3.9	4042	4871	5713	2.437	-7.356	Peak Center found at (59117);Inject Sample No 49
49	SG-126-34	60	85929	05/29/21	04:05:53	9	448.7	16.476	2.6	3.1	3.9	3881	4679	5483	2.411	-7.248	Peak Center found at (59117);Inject Sample No 49
49	SG-126-34	60	85929	05/29/21	04:05:53	10	508.5	15.819	2.6	3.1	3.9	3727	4493	5266	2.427	-7.33	Peak Center found at (59117);Inject Sample No 49
50	SG-126-35	108	85930	05/29/21	04:18:29	1	27.2	44.586	1.5	1.8	2.3	2468	2891	3401	-27.22	-33.52	Peak Center found at (59117);Inject Sample No 50
50	SG-126-35	108	85930	05/29/21	04:18:29	2	72.9	44.816	1.8	2.1	2.7	2459	2879	3388	-27.326	-33.554	Peak Center found at (59117);Inject Sample No 50
50	SG-126-35	108	85930	05/29/21	04:18:29	3	118.7	44.834	1.8	2.2	2.9	2463	2884	3393	-27.35	-33.6	Peak Center found at (59117);Inject Sample No 50
50	SG-126-35	108	85930	05/29/21	04:18:29	4	164.5	44.908	1.8	2.2	2.9	2465	2886	3395	-27.318	-33.595	Peak Center found at (59117);Inject Sample No 50
50	SG-126-35	108	85930	05/29/21	04:18:29	5	210	9.212	1.7	2.1	2.7	2162	2603	3076	0.779	-0.149	Peak Center found at (59117);Inject Sample No 50
50	SG-126-35	108	85930	05/29/21	04:18:29	6	269.8	9.178	1.9	2.3	3.1	2158	2598	3076	0.869	0.22	Peak Center found at (59117);Inject Sample No 50
50	SG-126-35	108	85930	05/29/21	04:18:29	7	329.4	8.803	2.0	2.4	3.1	2074	2497	2950	0.907	0.329	Peak Center found at (59117);Inject Sample No 50
50	SG-126-35	108	85930	05/29/21	04:18:29	8	389.2	8.437	2.0	2.4	3.1	1990	2395	2835	0.91	0.327	Peak Center found at (59117);Inject Sample No 50
50	SG-126-35	108	85930	05/29/21	04:18:29	9	448.7	8.112	2.0	2.4	3.1	1915	2306	2726	0.952	0.422	Peak Center found at (59117);Inject Sample No 50
50	SG-126-35	108	85930	05/29/21	04:18:29	10	508.5	7.818	2.0	2.4	3.1	1845	2221	2627	0.906	0.363	Peak Center found at (59117);Inject Sample No 50
51	SG-126-36	68	85931	05/29/21	04:31:05	1	27.2	44.523	1.4	1.7	2.3	2465	2887	3396	-27.276	-33.585	Peak Center found at (59117);Inject Sample No 51
51	SG-126-36	68	85931	05/29/21	04:31:05	2	72.9	44.854	1.7	2.0	2.6	2468	2890	3400	-27.369	-33.565	Peak Center found at (59117);Inject Sample No 51
51	SG-126-36	68	85931	05/29/21	04:31:05	3	118.7	44.807	1.8	2.1	2.8	2464	2886	3394	-27.35	-33.6	Peak Center found at (59117);Inject Sample No 51
51	SG-126-36	68	85931	05/29/21	04:31:05	4	164.5	44.864	1.8	2.1	2.8	2465	2886	3396	-27.325	-33.561	Peak Center found at (59117);Inject Sample No 51
51	SG-126-36	68	85931	05/29/21	04:31:05	5	210	13.811	1.7	2.0	2.7	3241	3902	4619	0.748	0.68	Peak Center found at (59117);Inject Sample No 51
51	SG-126-36	68	85931	05/29/21	04:31:05	6	269.6	13.783	2.1	2.5	3.3	3242	3904	4619	0.856	1.051	Peak Center found at (59117);Inject Sample No 51
51	SG-126-36	68	85931	05/29/21	04:31:05	7	329.4	13.254	2.2	2.7	3.5	3125	3762	4451	0.862	1.138	Peak Center found at (59117);Inject Sample No 51
51	SG-126-36	68	85931	05/29/21	04:31:05	8	389.2	12.727	2.3	2.7	3.6	3001	3613	4282	0.876	1.11	Peak Center found at (59117);Inject Sample No 51
51	SG-126-36	68	85931	05/29/21	04:31:05	9	448.7	12.265	2.3	2.7	3.6	2894	3484	4121	0.871	1.097	Peak Center found at (59117);Inject Sample No 51
51	SG-126-36	68	85931	05/29/21	04:31:05	10	508.5	11.805	2.3	2.8	3.6	2785	3353	3967	0.904	1.131	Peak Center found at (59117);Inject Sample No 51
52	SG-126-37	99	85932	05/29/21	04:43:43	1	27.2	44.619	1.5	1.8	2.3	2462	2884	3393	-27.235	-33.539	Peak Center found at (59117);Inject Sample No 52
52	SG-126-37	99	85932	05/29/21	04:43:43	2	72.9	44.881	1.8	2.1	2.8	2472	2895	3406	-27.288	-33.572	Peak Center found at (59117);Inject Sample No 52
52	SG-126-37	99	85932	05/29/21	04:43:43	3	118.7	44.823	1.8	2.2	2.8	2466	2888	3398	-27.35	-33.6	Peak Center found at (59117);Inject Sample No 52
52	SG-126-37	99	85932	05/29/21	04:43:43	4	164.5	44.818	1.8	2.2	2.9	2462	2883	3391	-27.378	-33.626	Peak Center found at (59117);Inject Sample No 52
52	SG-126-37	99	85932	05/29/21	04:43:43	5	210	11.079	1.7	2.1	2.8	2597	3126	3697	0.898	-0.084	Peak Center found at (59117);Inject Sample No 52
52	SG-126-37	99	85932	05/29/21	04:43:43	6	269.6	11.098	2.0	2.4	3.2	2604	3136	3711	1.162	0.32	Peak Center found at (59117);Inject Sample No 52
52	SG-126-37	99	85932	05/29/21	04:43:43	7	329.4	10.643	2.1	2.6	3.4	2504	3016	3561	1.159	0.223	Peak Center found at (59117);Inject Sample No 52
52	SG-126-37	99	85932	05/29/21	04:43:43	8	389.2	10.192	2.1	2.6	3.4	2405	2896	3425	1.165	0.397	Peak Center found at (59117);Inject Sample No 52
52	SG-126-37	99	85932	05/29/21	04:43:43	9	448.7	9.795	2.1	2.6	3.4	2312	2784	3291	1.105	0.321	Peak Center found at (59117);Inject Sample No 52
52	SG-126-37	99	85932	05/29/21	04:43:43	10	508.5	9.425	2.1	2.6	3.4	2226	2681	3170	1.062	0.315	Peak Center found at (59117);Inject Sample No 52
53	SG-126-38	98	85933	05/29/21	04:56:22	1	27.2	44.601	1.5	1.8	2.4	2463	2884	3393	-27.304	-33.583	Peak Center found at (59117);Inject Sample No 53
53	SG-126-38	98	85933	05/29/21	04:56:22	2	72.9	44.8	1.8	2.1	2.8	2463	2885	3394	-27.349	-33.575	Peak Center found at (59117);Inject Sample No 53
53	SG-126-38	98	85933	05/29/21	04:56:22	3	118.7	44.76	1.8	2.2	2.9	2460	2881	3389	-27.35	-33.6	Peak Center found at (59117);Inject Sample No 53
53	SG-126-38	98	85933	05/29/21	04:56:22	4	164.5	44.79	1.8	2.2	2.9	2464	2886	3394	-27.387	-33.566	Peak Center found at (59117);Inject Sample No 53
53	SG-126-38	98	85933	05/29/21	04:56:22	5	210	15.897	1.8	2.1	2.9	3730	4492	5325	1.254	1.628	Peak Center found at (59117);Inject Sample No 53
53	SG-126-38	98	85933	05/29/21	04:56:22	6	269.6	15.88	2.3	2.8	3.6	3730	4494	5314	1.336	2.006	Peak Center found at (59117);Inject Sample No 53
53	SG-126-38	98	85933	05/29/21	04:56:22	7	329.4	15.276	2.4	2.9	3.8	3591	4326	5119	1.326	1.971	Peak Center found at (59117);Inject Sample No 53
53	SG-126-38	98	85933	05/29/21	04:56:22	8	389.2	14.679	2.5	3.0	3.9	3455	4161	4931	1.316	2.016	Peak Center found at (59117);Inject Sample No 53
53	SG-126-38	98	85933	05/29/21	04:56:22	9	448.7	14.102	2.5	3.0	4.0	3324	4005	4739	1.296	2.001	Peak Center found at (59117);Inject Sample No 53
53	SG-126-38	98	85933	05/29/21	04:56:22	10	508.5	13.57	2.5	3.0	4.0	3202	3856	4567	1.333	1.969	Peak Center found at (59117);Inject Sample No 53
54	SG-126-39	77	85934	05/29/21	05:08:59	1	27.2	44.545	1.5	1.8	2.5	2462	2884	3392	-27.264	-33.543	Peak Center found at (59117);Inject Sample No 54
54	SG-126-39	77	85934	05/29/21	05:08:59	2	72.9	44.746	1.8	2.2	2.9	2457	2878	3385	-27.351	-33.581	Peak Center found at (59117);Inject Sample No 54
54	SG-126-39	77	85934	05/29/21	05:08:59	3	118.7	44.779	1.9	2.2	3.0	2459	2880	3388	-27.35	-33.6	Peak Center found at (59117);Inject Sample No 54
54	SG-126-39	77	85934	05/29/21	05:08:59	4	164.5	44.758	1.9	2.3	3.0	2457	2877	3385	-27.353	-33.597	Peak Center found at (59117);Inject Sample No 54
54	SG-126-39	77	85934	05/29/21	05:08:59	5	210	11.86	1.8	2.1	2.9	2771	3335	3952	0.781	1.337	Peak Center found at (59117);Inject Sample No 54
54	SG-126-39	77	85934	05/29/21	05:08:59	6	269.6	11.83	2.1	2.5	3.4	2773	3339	3952	0.961	1.771	Peak Center found at (59117);Inject Sample No 54
54	SG-126-39	77	85934	05/29/21	05:08:59	7	329.4	11.346	2.2	2.6	3.5	2665	3210	3797	0.909	1.713	Peak Center found at (59117);Inject Sample No 54
54	SG-126-39	77	85934	05/29/21	05:08:59	8	389.2	10.86	2.2	2.7	3.6	2559	3081	3654	0.9	1.706	Peak Center found at (59117);Inject Sample No 54
54	SG-126-39	77	85934	05/29/21	05:08:59	9	448.7	10.408	2.2	2.7	3.5	2460	2962	3505	0.951	1.752	Peak Center found at (59117);Inject Sample No 54
54	SG-126-39	77	85934	05/29/21	05:08:59	10	508.5	10.013	2.2	2.7	3.5	2364	2846	3374	0.928	1.767	Peak Center found at (59117);Inject Sample No 54
55	SG-126-40	63	85935	05/29/21	05:21:36	1	27.2	44.308	1.5	1.8	2.4	2445	2863	3369	-27.275	-33.573	Peak Center found at (59117);Inject Sample No 55
55	SG-126-40	63	85935	05/29/21	05:21:36	2	72.9	44.699	1.8	2.1	2.9	2457	2877	3384	-27.348	-33.633	Peak Center found at (59117);Inject Sample No 55
55	SG-126-40	63	85935	05/29/21	05:21:36	3	118.7	44.598	1.8	2.2	2.9	2451	2871	3377	-27.35	-33.6	Peak Center found at (59117);Inject Sample No 55
55	SG-126-40	63	85935	05/29/21	05:21:36	4	164.5	44.636	1.8	2.2	3.0	2452	2872	3379	-27.357	-33.635	Peak Center found at (59117);Inject Sample No 55
55	SG-126-40	63	85935	05/29/21	05:21:36	5	210	8.755	1.8	2.1	2.8	2056	2474	2930	0.409	-0.285	Peak Center found at (59117);Inject Sample No 55
55	SG-126-40	63	85935	05/29/21	05:21:36	6	269.6	8.744	1.9	2.3	3.1	2058	2477	2925	0.498	0.014	Peak Center found at (59117);Inject Sample No 55
55	SG-126-40	63	85935	05/29/21	05:21:36	7	329.4	8.399	2.0	2.4	3.2	1978	2380	2817	0.561	0.129	Peak Center found at (59117);Inject Sample No 55
55	SG-126-40	63	85935	05/29/21	05:21:36	8	388.9	8.064	2.0	2.4	3.3	1901	2289	2709	0.63	0.121	Peak Center found at (59117);Inject Sample No 55
55	SG-126-40	63	85935	05/29/21	05:21:36	9	448.7	7.742	2.0	2.4	3.2	1830	2202	2603	0.666	0.189	Peak Center found at (59117);Inject Sample No 55
55	SG-126-40	63	85935	05/29/21	05:21:36	10	508.5	7.426	2.0	2.4	3.2	1757	2114	2505	0.639	0.303	Peak Center found at (59117);Inject Sample No 55
56	SG-126-41	72	85936	05/29/21	05:34:15	1	27.2	44.405	1.4	1.7	2.4	2451	2870	3377	-27.275	-33.575	Peak Center found at (59117);Inject Sample No 56
56	SG-126-41	72	85936	05/29/21	05:34:15	2	72.9	44.714	1.7	2.1	2.8	2457	2877	3385	-27.33	-33.598	Peak Center found at (59117);Inject Sample No 56
56	SG-126-41	72	85936	05/29/21	05:34:15	3	118.7	44.655	1.8	2.1	2.9	2453	2873	3380	-27.35	-33.6	Peak Center found at (59117);Inject Sample No 56
56	SG-126-41	72	85936	05/29/21	05:34:15	4	164.5	44.619	1.8	2.2	2.9	2451	2871	3377	-27.355	-33.545	Peak Center found at (59117);Inject Sample No 56
56	SG-126-41	72	85936	05/29/21	05:34:15	5	209.8	9.562	1.7	2.1	2.9	2233	2690	3182	1.263	-0.032	Peak Center found at (59117);Inject Sample No 56
56	SG-126-41	72	85936	05/29/21	05:34:15	6	269.6	9.565	2.0	2.4	3.2	2245	2704	3195	1.34	0.417	Peak Center found at (59117);Inject Sample No 56
56	SG-126-41	72	85936	05/29/21	05:34:15	7	329.4	9.142	2.0	2.5	3.3	2150	2590	3063	1.388	0.286	Peak Center found at (59117);Inject Sample No 56
56	SG-126-41	72	85936	05/29/21	05:34:15	8	389.2	8.77	2.1	2.5	3.3	2064	2487	2944	1.384	0.412	Peak Center found at (59117);Inject Sample No 56
56	SG-126-41	72	85936	05/29/21	05:34:15	9	448.7	8.419	2.1	2.5	3.3	1988	2395	2829	1.431	0.486	Peak Center found at (59117);Inject Sample No 56
56	SG-126-41	72	85936	05/29/21	05:34:15	10	508.5	8.081	2.0	2.5	3.3	1909	2299	2722	1.416	0.436	Peak Center found at (59117);Inject Sample No 56
57	naxos-7	145	85937	05/29/21	05:46:53	1	27.2	44.295	1.5	1.7	2.4	2448	2867	3373	-27.249	-33.552	Peak Center found at (59117);Inject Sample No 57
57	naxos-7	145	85937	05/29/21	05:46:53	2	72.9	44.614	1.7	2.1	2.7	2454	2874	3381	-27.318	-33.581	Peak Center found at (59117);Inject Sample No 57
57	naxos-7	145	85937	05/29/21	05:46:53	3	118.7	44.619	1.8	2.1	2.9	2454	2874	3380	-27.35	-33.6	Peak Center found at (59117);Inject Sample No 57
57	naxos-7	145	85937	05/29/21	05:46:53	4	164.5	44.614	1.8	2.2	3.0	2449	2868	3374	-27.389	-33.64	Peak Center found at (59117);Inject Sample No 57
57	naxos-7	145	85937	05/29/21	05:46:53	5	209.8	12.868	1.7	2.1	2.8	3028	3643	4307	-0.034	0.804	Peak Center found at (59117);Inject Sample No 57
57	naxos-7	145	85937	05/29/21	05:46:53	6	269.6	12.894	2.1	2.5	3.4	3035	3652	4323	0.127	1.082	Peak Center found at (59117);Inject Sample No 57
57	naxos-7	145	85937	05/29/21	05:46:53	7	329.4	12.379	2.2	2.7	3.6	2914	3506	4157	0.188	1.226	Peak Center found at (59117);Inject Sample No 57
57	naxos-7	145	85937	05/29/21	05:46:53	8	388.9	11.903	2.3	2.7	3.5	2807	3377	3997	0.146	1.266	Peak Center found at (59117);Inject Sample No 57
57	naxos-7	145	85937	05/29/21	05:46:53	9	448.7	11.458	2.3	2.7	3.6	2701	3250	3851	0.216	1.224	Peak Center found at (59117);Inject Sample No 57
57	naxos-7	145	85937	05/29/21	05:46:53	10	508.3	11.02	2.3	2.7	3.6	2599	3128	3705	0.188	1.207	Peak Center found at (59117);Inject Sample No 57
58	SG-126-42	100	85938	05/29/21	05:59:29	1	27.2	44.328	1.5	1.8	2.5	2452	2871	3378	-27.259	-33.56	Peak Center found at (59117);Inject Sample No 58
58	SG-126-42	100	85938	05/29/21	05:59:29	2	72.9	44.558	1.8	2.1	2.8	2452	2872	3379	-27.289	-33.6	Peak Center found at (59117);Inject Sample No 58
58	SG-126-42	100	85938	05/29/21	05:59:29	3	118.7	44.61	1.8	2.2	2.9	2452	2871	3377	-27.35	-33.6	Peak Center found at (59117);Inject Sample No 58
58	SG-126-42	100	85938	05/29/21	05:59:29	4	164.5	44.626	1.8	2.2	3.0	2453	2872	3379	-27.329	-33.64	Peak Center found at (59117);Inject Sample No 58
58	SG-126-42	100	85938	05/29/21	05:59:29	5	209.8	13.395	1.8	2.1	2.9	3150	3794	4480	1.244	0.358	Peak Center found at (59117);Inject Sample No 58
58	SG-126-42	100	85938	05/29/21	05:59:29	6	269.6	13.528	2.2	2.6	3.4	3185	3836	4535	1.416	0.873	Peak Center found at (59117);Inject Sample No 58
58	SG-126-42	100	85938	05/29/21	05:59:29	7	329.4	13.031	2.3	2.8	3.6	3064	3690	4371	1.349	0.895	Peak Center found at (59117);Inject Sample No 58
58	SG-126-42	100	85938	05/29/21	05:59:29	8	388.9	12.522	2.3	2.8	3.7	2952	3556	4203	1.425	0.868	Peak Center found at (59117);Inject Sample No 58
58	SG-126-42	100	85938	05/29/21	05:59:29	9	448.7	12.07	2.3	2.8	3.7	2847	3429	4055	1.374	0.896	Peak Center found at (59117);Inject Sample No 58
58	SG-126-42	100	85938	05/29/21	05:59:29	10	508.3	11.581	2.3	2.8	3.7	2732	3291	3896	1.41	0.788	Peak Center found at (59117);Inject Sample No 58
59	SG-126-43	85	85939	05/29/21	06:12:05	1	27.2	44.34	1.5	1.8	2.5	2451	2870	3376	-27.285	-33.585	Peak Center found at (59117);Inject Sample No 59
59	SG-126-43	85	85939	05/29/21	06:12:05	2	72.9	44.568	1.8	2.1	2.9	2451	2871	3377	-27.324	-33.557	Peak Center found at (59117);Inject Sample No 59
59	SG-126-43	85	85939	05/29/21	06:12:05	3	118.7	44.593	1.8	2.2	2.9	2449	2868	3374	-27.35	-33.6	Peak Center found at (59117);Inject Sample No 59
59	SG-126-43	85	85939	05/29/21	06:12:05	4	164.5	44.59	1.8	2.2	3.0	2454	2874	3381	-27.364	-33.578	Peak Center found at (59117);Inject Sample No 59
59	SG-126-43	85	85939	05/29/21	06:12:05	5	209.8	12.258	1.8	2.1	2.9	2879	3467	4099	1.093	0.927	Peak Center found at (59117);Inject Sample No 59
59	SG-126-43	85	85939	05/29/21	06:12:05	6	269.6	12.285	2.1	2.6	3.3	2890	3481	4121	1.196	1.352	Peak Center found at (59117);Inject Sample No 59
59	SG-126-43	85	85939	05/29/21	06:12:05	7	329.2	11.803	2.2	2.7	3.5	2776	3344	3960	1.218	1.349	Peak Center found at (59117);Inject Sample No 59
59	SG-126-43	85	85939	05/29/21	06:12:05	8	388.9	11.32	2.2	2.7	3.6	2669	3215	3803	1.221	1.305	Peak Center found at (59117);Inject Sample No 59
59	SG-126-43	85	85939	05/29/21	06:12:05	9	448.7	10.896	2.2	2.7	3.6	2571	3096	3665	1.31	1.369	Peak Center found at (59117);Inject Sample No 59
59	SG-126-43	85	85939	05/29/21	06:12:05	10	508.3	10.483	2.2	2.7	3.6	2474	2980	3525	1.284	1.335	Peak Center found at (59117);Inject Sample No 59
60	SG-126-44	71	85940	05/29/21	06:24:43	1	27.2	44.495	1.5	1.8	2.4	2461	2883	3391	-27.263	-33.578	Peak Center found at (59117);Inject Sample No 60
60	SG-126-44	71	85940	05/29/21	06:24:43	2	72.9	44.692	1.8	2.1	2.9	2456	2876	3383	-27.323	-33.627	Peak Center found at (59117);Inject Sample No 60
60	SG-126-44	71	85940	05/29/21	06:24:43	3	118.7	44.661	1.8	2.2	2.9	2454	2874	3381	-27.35	-33.6	Peak Center found at (59117);Inject Sample No 60
60	SG-126-44	71	85940	05/29/21	06:24:43	4	164.5	44.664	1.8	2.2	2.9	2449	2868	3373	-27.343	-33.614	Peak Center found at (59117);Inject Sample No 60
60	SG-126-44	71	85940	05/29/21	06:24:43	5	209.8	10.994	1.8	2.1	2.9	2590	3116	3683	-0.056	0.446	Peak Center found at (59117);Inject Sample No 60
60	SG-126-44	71	85940	05/29/21	06:24:43	6	269.6	11.027	2.0	2.5	3.3	2600	3128	3703	0.147	0.831	Peak Center found at (59117);Inject Sample No 60
60	SG-126-44	71	85940	05/29/21	06:24:43	7	329.4	10.592	2.1	2.6	3.5	2496	3003	3557	0.149	0.808	Peak Center found at (59117);Inject Sample No 60
60	SG-126-44	71	85940	05/29/21	06:24:43	8	388.9	10.166	2.2	2.6	3.5	2398	2885	3415	0.077	0.935	Peak Center found at (59117);Inject Sample No 60
60	SG-126-44	71	85940	05/29/21	06:24:43	9	448.7	9.792	2.2	2.6	3.5	2311	2780	3293	0.136	0.886	Peak Center found at (59117);Inject Sample No 60
60	SG-126-44	71	85940	05/29/21	06:24:43	10	508.3	9.42	2.1	2.6	3.4	2224	2675	3167	0.194	0.999	Peak Center found at (59117);Inject Sample No 60
61	SG-126-45	87	85941	05/29/21	06:37:20	1	27.2	44.269	1.5	1.7	2.4	2450	2868	3374	-27.267	-33.505	Peak Center found at (59117);Inject Sample No 61
61	SG-126-45	87	85941	05/29/21	06:37:20	2	72.9	44.59	1.7	2.1	2.9	2450	2869	3376	-27.329	-33.592	Peak Center found at (59117);Inject Sample No 61
61	SG-126-45	87	85941	05/29/21	06:37:20	3	118.7	44.779	1.8	2.2	2.9	2460	2880	3388	-27.35	-33.6	Peak Center found at (59117);Inject Sample No 61
61	SG-126-45	87	85941	05/29/21	06:37:20	4	164.5	44.657	1.8	2.2	2.9	2453	2873	3379	-27.37	-33.596	Peak Center found at (59117);Inject Sample No 61
61	SG-126-45	87	85941	05/29/21	06:37:20	5	209.8	15.129	1.7	2.1	2.8	3559	4280	5059	-0.42	0.234	Peak Center found at (59117);Inject Sample No 61
61	SG-126-45	87	85941	05/29/21	06:37:20	6	269.6	15.137	2.2	2.6	3.4	3564	4286	5075	-0.253	0.656	Peak Center found at (59117);Inject Sample No 61
61	SG-126-45	87	85941	05/29/21	06:37:20	7	329.4	14.558	2.3	2.8	3.7	3424	4117	4879	-0.246	0.664	Peak Center found at (59117);Inject Sample No 61
61	SG-126-45	87	85941	05/29/21	06:37:20	8	388.9	13.984	2.4	2.9	3.7	3293	3961	4694	-0.281	0.737	Peak Center found at (59117);Inject Sample No 61
61	SG-126-45	87	85941	05/29/21	06:37:20	9	448.7	13.464	2.4	2.9	3.8	3173	3815	4516	-0.283	0.626	Peak Center found at (59117);Inject Sample No 61
61	SG-126-45	87	85941	05/29/21	06:37:20	10	508.5	12.986	2.4	2.9	3.8	3061	3682	4366	-0.279	0.617	Peak Center found at (59117);Inject Sample No 61
62	SG-126-46	109	85942	05/29/21	06:49:57	1	27.2	44.402	1.5	1.8	2.4	2453	2873	3380	-27.259	-33.573	Peak Center found at (59117);Inject Sample No 62
62	SG-126-46	109	85942	05/29/21	06:49:57	2	72.9	44.639	1.7	2.1	2.8	2453	2873	3380	-27.344	-33.605	Peak Center found at (59117);Inject Sample No 62
62	SG-126-46	109	85942	05/29/21	06:49:57	3	118.7	44.626	1.8	2.2	2.9	2454	2873	3379	-27.35	-33.6	Peak Center found at (59117);Inject Sample No 62
62	SG-126-46	109	85942	05/29/21	06:49:57	4	164.5	44.618	1.8	2.2	3.0	2452	2872	3378	-27.362	-33.608	Peak Center found at (59117);Inject Sample No 62
62	SG-126-46	109	85942	05/29/21	06:49:57	5	209.8	9.912	1.7	2.1	2.8	2334	2809	3324	0.337	0.305	Peak Center found at (59117);Inject Sample No 62
62	SG-126-46	109	85942	05/29/21	06:49:57	6	269.6	9.898	2.0	2.4	3.2	2333	2807	3318	0.438	0.709	Peak Center found at (59117);Inject Sample No 62
62	SG-126-46	109	85942	05/29/21	06:49:57	7	329.4	9.509	2.0	2.5	3.3	2242	2698	3192	0.409	0.649	Peak Center found at (59117);Inject Sample No 62
62	SG-126-46	109	85942	05/29/21	06:49:57	8	388.9	9.138	2.0	2.5	3.3	2154	2593	3072	0.525	0.672	Peak Center found at (59117);Inject Sample No 62
62	SG-126-46	109	85942	05/29/21	06:49:57	9	448.7	8.796	2.0	2.5	3.3	2077	2499	2955	0.457	0.75	Peak Center found at (59117);Inject Sample No 62
62	SG-126-46	109	85942	05/29/21	06:49:57	10	508.5	8.468	2.0	2.4	3.3	2000	2406	2850	0.536	0.749	Peak Center found at (59117);Inject Sample No 62
63	SG-126-47	83	85943	05/29/21	07:02:34	1	27.2	44.361	1.4	1.7	2.3	2454	2874	3381	-27.295	-33.537	Peak Center found at (59117);Inject Sample No 63
63	SG-126-47	83	85943	05/29/21	07:02:34	2	72.9	44.585	1.7	2.0	2.8	2450	2870	3375	-27.368	-33.605	Peak Center found at (59117);Inject Sample No 63
63	SG-126-47	83	85943	05/29/21	07:02:34	3	118.7	44.698	1.7	2.1	2.9	2453	2872	3378	-27.35	-33.6	Peak Center found at (59117);Inject Sample No 63
63	SG-126-47	83	85943	05/29/21	07:02:34	4	164.5	44.604	1.8	2.1	2.9	2452	2871	3378	-27.374	-33.572	Peak Center found at (59117);Inject Sample No 63
63	SG-126-47	83	85943	05/29/21	07:02:34	5	209.8	10.349	1.7	2.0	2.7	2430	2925	3457	0.628	0.322	Peak Center found at (59117);Inject Sample No 63
63	SG-126-47	83	85943	05/29/21	07:02:34	6	269.6	10.339	1.9	2.4	3.1	2433	2929	3464	0.739	0.75	Peak Center found at (59117);Inject Sample No 63
63	SG-126-47	83	85943	05/29/21	07:02:34	7	329.4	9.925	2.0	2.4	3.3	2336	2811	3330	0.746	0.783	Peak Center found at (59117);Inject Sample No 63
63	SG-126-47	83	85943	05/29/21	07:02:34	8	388.9	9.535	2.0	2.5	3.3	2248	2706	3203	0.716	0.737	Peak Center found at (59117);Inject Sample No 63
63	SG-126-47	83	85943	05/29/21	07:02:34	9	448.7	9.145	2.0	2.4	3.3	2161	2601	3073	0.758	0.726	Peak Center found at (59117);Inject Sample No 63
63	SG-126-47	83	85943	05/29/21	07:02:34	10	508.5	8.78	2.0	2.4	3.2	2075	2498	2959	0.757	0.905	Peak Center found at (59117);Inject Sample No 63
64	SG-126-48	67	85944	05/29/21	07:15:32	1	27.2	44.541	1.5	1.8	2.5	2457	2876	3384	-27.293	-33.554	Peak Center found at (59112);Inject Sample No 64
64	SG-126-48	67	85944	05/29/21	07:15:32	2	72.9	44.733	1.7	2.1	2.9	2454	2872	3378	-27.317	-33.576	Peak Center found at (59112);Inject Sample No 64
64	SG-126-48	67	85944	05/29/21	07:15:32	3	118.7	44.79	1.8	2.1	2.9	2462	2881	3389	-27.35	-33.6	Peak Center found at (59112);Inject Sample No 64
64	SG-126-48	67	85944	05/29/21	07:15:32	4	164.5	44.785	1.8	2.1	2.9	2464	2884	3393	-27.333	-33.559	Peak Center found at (59112);Inject Sample No 64
64	SG-126-48	67	85944	05/29/21	07:15:32	5	209.8	8.774	1.7	2.0	2.8	2061	2479	2937	0.376	0.486	Peak Center found at (59112);Inject Sample No 64
64	SG-126-48	67	85944	05/29/21	07:15:32	6	269.6	8.774	1.9	2.2	3.0	2067	2487	2940	0.579	0.903	Peak Center found at (59112);Inject Sample No 64
64	SG-126-48	67	85944	05/29/21	07:15:32	7	329.4	8.423	1.9	2.3	3.1	1989	2392	2829	0.609	0.868	Peak Center found at (59112);Inject Sample No 64
64	SG-126-48	67	85944	05/29/21	07:15:32	8	389.2	8.074	1.9	2.3	3.1	1908	2295	2719	0.57	0.928	Peak Center found at (59112);Inject Sample No 64
64	SG-126-48	67	85944	05/29/21	07:15:32	9	448.7	7.779	1.9	2.3	3.1	1840	2214	2616	0.708	0.974	Peak Center found at (59112);Inject Sample No 64
64	SG-126-48	67	85944	05/29/21	07:15:32	10	508.5	7.484	1.9	2.3	3.1	1770	2128	2519	0.637	1.032	Peak Center found at (59112);Inject Sample No 64
65	Kiel Carbo c	113	85945	05/29/21	07:28:10	1	27.2	44.429	1.3	1.6	2.2	2456	2876	3384	-27.281	-33.58	Peak Center found at (59117);Inject Sample No 65
65	Kiel Carbo c	113	85945	05/29/21	07:28:10	2	72.9	44.691	1.6	1.9	2.7	2458	2878	3385	-27.325	-33.584	Peak Center found at (59117);Inject Sample No 65
65	Kiel Carbo c	113	85945	05/29/21	07:28:10	3	118.7	44.636	1.7	2.0	2.8	2452	2871	3379	-27.35	-33.6	Peak Center found at (59117);Inject Sample No 65
65	Kiel Carbo c	113	85945	05/29/21	07:28:10	4	164.5	44.64	1.7	2.1	2.8	2457	2877	3385	-27.392	-33.614	Peak Center found at (59117);Inject Sample No 65
65	Kiel Carbo c	113	85945	05/29/21	07:28:10	5	209.8	18.359	1.6	2.0	2.7	4297	4999	6021	-34.911	-16.841	Peak Center found at (59117);Inject Sample No 65
65	Kiel Carbo c	113	85945	05/29/21	07:28:10	6	269.6	18.385	2.2	2.7	3.6	4320	5025	6038	-34.793	-16.49	Peak Center found at (59117);Inject Sample No 65
65	Kiel Carbo c	113	85945	05/29/21	07:28:10	7	329.4	17.647	2.4	2.9	3.8	4158	4836	5819	-34.873	-16.49	Peak Center found at (59117);Inject Sample No 65
65	Kiel Carbo c	113	85945	05/29/21	07:28:10	8	389.2	16.929	2.5	3.0	3.9	3992	4642	5594	-34.925	-16.486	Peak Center found at (59117);Inject Sample No 65
65	Kiel Carbo c	113	85945	05/29/21	07:28:10	9	448.7	16.291	2.5	3.0	4.0	3847	4475	5377	-34.897	-16.532	Peak Center found at (59117);Inject Sample No 65
65	Kiel Carbo c	113	85945	05/29/21	07:28:10	10	508.5	15.682	2.5	2.9	3.9	3704	4308	5184	-34.825	-16.459	Peak Center found at (59117);Inject Sample No 65
66	naxos-8	78	85946	05/29/21	07:40:47	1	27.2	44.486	1.4	1.7	2.4	2460	2880	3389	-27.253	-33.586	Peak Center found at (59117);Inject Sample No 66
66	naxos-8	78	85946	05/29/21	07:40:47	2	72.9	44.747	1.7	2.1	2.9	2463	2883	3392	-27.338	-33.655	Peak Center found at (59117);Inject Sample No 66
66	naxos-8	78	85946	05/29/21	07:40:47	3	118.7	44.785	1.7	2.1	2.9	2467	2889	3399	-27.35	-33.6	Peak Center found at (59117);Inject Sample No 66
66	naxos-8	78	85946	05/29/21	07:40:47	4	164.5	44.772	1.8	2.1	2.9	2460	2880	3388	-27.375	-33.634	Peak Center found at (59117);Inject Sample No 66
66	naxos-8	78	85946	05/29/21	07:40:47	5	210	14.334	1.7	2.0	2.8	3350	4034	4731	1.85	-7.874	Peak Center found at (59117);Inject Sample No 66
66	naxos-8	78	85946	05/29/21	07:40:47	6	269.6	14.331	2.1	2.5	3.3	3359	4048	4751	2.236	-7.383	Peak Center found at (59117);Inject Sample No 66
66	naxos-8	78	85946	05/29/21	07:40:47	7	329.4	13.744	2.2	2.7	3.6	3232	3895	4561	2.177	-7.464	Peak Center found at (59117);Inject Sample No 66
66	naxos-8	78	85946	05/29/21	07:40:47	8	389.2	13.178	2.3	2.7	3.6	3109	3746	4394	2.178	-7.46	Peak Center found at (59117);Inject Sample No 66
66	naxos-8	78	85946	05/29/21	07:40:47	9	448.7	12.678	2.3	2.8	3.7	2989	3603	4224	2.201	-7.56	Peak Center found at (59117);Inject Sample No 66
66	naxos-8	78	85946	05/29/21	07:40:47	10	508.5	12.212	2.2	2.8	3.7	2881	3471	4067	2.161	-7.525	Peak Center found at (59117);Inject Sample No 66
67	SG-126-49	76	85947	05/29/21	07:53:25	1	27.2	44.444	1.4	1.7	2.4	2458	2879	3386	-27.303	-33.573	Peak Center found at (59117);Inject Sample No 67
67	SG-126-49	76	85947	05/29/21	07:53:25	2	72.9	44.707	1.7	2.0	2.7	2458	2878	3386	-27.362	-33.554	Peak Center found at (59117);Inject Sample No 67
67	SG-126-49	76	85947	05/29/21	07:53:25	3	118.7	44.724	1.7	2.1	2.9	2456	2876	3383	-27.35	-33.6	Peak Center found at (59117);Inject Sample No 67
67	SG-126-49	76	85947	05/29/21	07:53:25	4	164.5	44.777	1.7	2.1	2.9	2454	2873	3381	-27.384	-33.597	Peak Center found at (59117);Inject Sample No 67
67	SG-126-49	76	85947	05/29/21	07:53:25	5	210	9.12	1.7	2.0	2.8	2135	2567	3039	-0.225	0.072	Peak Center found at (59117);Inject Sample No 67
67	SG-126-49	76	85947	05/29/21	07:53:25	6	269.6	9.093	1.9	2.2	3.0	2137	2570	3047	-0.118	0.635	Peak Center found at (59117);Inject Sample No 67
67	SG-126-49	76	85947	05/29/21	07:53:25	7	329.4	8.725	1.9	2.3	3.1	2055	2471	2922	-0.069	0.559	Peak Center found at (59117);Inject Sample No 67
67	SG-126-49	76	85947	05/29/21	07:53:25	8	389.2	8.368	1.9	2.4	3.2	1974	2374	2810	-0.109	0.555	Peak Center found at (59117);Inject Sample No 67
67	SG-126-49	76	85947	05/29/21	07:53:25	9	448.7	8.032	1.9	2.3	3.1	1894	2278	2699	-0.099	0.662	Peak Center found at (59117);Inject Sample No 67
67	SG-126-49	76	85947	05/29/21	07:53:25	10	508.5	7.722	1.9	2.3	3.1	1822	2192	2594	-0.09	0.72	Peak Center found at (59117);Inject Sample No 67
68	SG-126-50	52	85948	05/29/21	08:06:01	1	27.2	44.402	1.3	1.6	2.3	2461	2881	3389	-27.282	-33.592	Peak Center found at (59117);Inject Sample No 68
68	SG-126-50	52	85948	05/29/21	08:06:01	2	72.9	44.758	1.6	2.0	2.7	2459	2880	3388	-27.353	-33.58	Peak Center found at (59117);Inject Sample No 68
68	SG-126-50	52	85948	05/29/21	08:06:01	3	118.7	44.711	1.7	2.0	2.8	2456	2876	3383	-27.35	-33.6	Peak Center found at (59117);Inject Sample No 68
68	SG-126-50	52	85948	05/29/21	08:06:01	4	164.5	44.763	1.7	2.1	2.8	2454	2873	3380	-27.406	-33.613	Peak Center found at (59117);Inject Sample No 68
68	SG-126-50	52	85948	05/29/21	08:06:01	5	210	7.006	1.6	1.9	2.7	1642	1976	2335	0.625	-0.494	Peak Center found at (59117);Inject Sample No 68
68	SG-126-50	52	85948	05/29/21	08:06:01	6	269.6	6.98	1.7	2.1	2.9	1642	1976	2338	0.748	-0.152	Peak Center found at (59117);Inject Sample No 68
68	SG-126-50	52	85948	05/29/21	08:06:01	7	329.4	6.7	1.8	2.1	2.9	1580	1901	2246	0.817	0.014	Peak Center found at (59117);Inject Sample No 68
68	SG-126-50	52	85948	05/29/21	08:06:01	8	389.2	6.415	1.8	2.2	3.0	1516	1825	2158	0.777	-0.057	Peak Center found at (59117);Inject Sample No 68
68	SG-126-50	52	85948	05/29/21	08:06:01	9	448.7	6.168	1.8	2.1	3.0	1456	1753	2073	0.784	-0.155	Peak Center found at (59117);Inject Sample No 68
68	SG-126-50	52	85948	05/29/21	08:06:01	10	508.5	5.927	1.8	2.1	3.0	1401	1685	1993	0.874	-0.101	Peak Center found at (59117);Inject Sample No 68
69	SG-126-51	61	85949	05/29/21	08:18:40	1	27.2	44.46	1.3	1.6	2.2	2460	2881	3389	-27.274	-33.604	Peak Center found at (59117);Inject Sample No 69
69	SG-126-51	61	85949	05/29/21	08:18:40	2	72.9	44.721	1.6	2.0	2.6	2455	2875	3383	-27.344	-33.62	Peak Center found at (59117);Inject Sample No 69
69	SG-126-51	61	85949	05/29/21	08:18:40	3	118.7	44.728	1.6	2.0	2.7	2458	2878	3386	-27.35	-33.6	Peak Center found at (59117);Inject Sample No 69
69	SG-126-51	61	85949	05/29/21	08:18:40	4	164.5	44.72	1.7	2.0	2.8	2453	2873	3379	-27.323	-33.622	Peak Center found at (59117);Inject Sample No 69
69	SG-126-51	61	85949	05/29/21	08:18:40	5	210	7.764	1.6	1.9	2.7	1824	2193	2594	0.189	-0.795	Peak Center found at (59117);Inject Sample No 69
69	SG-126-51	61	85949	05/29/21	08:18:40	6	269.6	7.758	1.8	2.2	2.9	1826	2198	2601	0.386	-0.391	Peak Center found at (59117);Inject Sample No 69
69	SG-126-51	61	85949	05/29/21	08:18:40	7	329.4	7.443	1.8	2.2	3.0	1755	2112	2494	0.398	-0.339	Peak Center found at (59117);Inject Sample No 69
69	SG-126-51	61	85949	05/29/21	08:18:40	8	389.2	7.149	1.8	2.2	3.0	1689	2032	2403	0.472	-0.377	Peak Center found at (59117);Inject Sample No 69
69	SG-126-51	61	85949	05/29/21	08:18:40	9	448.7	6.869	1.8	2.2	3.0	1621	1950	2308	0.491	-0.274	Peak Center found at (59117);Inject Sample No 69
69	SG-126-51	61	85949	05/29/21	08:18:40	10	508.5	6.611	1.8	2.2	3.0	1562	1879	2221	0.448	-0.358	Peak Center found at (59117);Inject Sample No 69
70	SG-126-52	59	85950	05/29/21	08:31:17	1	27.2	44.478	1.3	1.6	2.3	2460	2880	3388	-27.31	-33.58	Peak Center found at (59117);Inject Sample No 70
70	SG-126-52	59	85950	05/29/21	08:31:17	2	72.9	44.706	1.6	1.9	2.6	2456	2875	3383	-27.35	-33.62	Peak Center found at (59117);Inject Sample No 70
70	SG-126-52	59	85950	05/29/21	08:31:17	3	118.7	44.747	1.6	2.0	2.7	2459	2880	3387	-27.35	-33.6	Peak Center found at (59117);Inject Sample No 70
70	SG-126-52	59	85950	05/29/21	08:31:17	4	164.5	44.7	1.7	2.1	2.8	2460	2881	3389	-27.378	-33.585	Peak Center found at (59117);Inject Sample No 70
70	SG-126-52	59	85950	05/29/21	08:31:17	5	210	8.261	1.6	1.9	2.6	1940	2334	2762	0.291	0.509	Peak Center found at (59117);Inject Sample No 70
70	SG-126-52	59	85950	05/29/21	08:31:17	6	269.6	8.242	1.8	2.2	3.0	1939	2334	2764	0.427	0.755	Peak Center found at (59117);Inject Sample No 70
70	SG-126-52	59	85950	05/29/21	08:31:17	7	329.4	7.9	1.8	2.2	3.0	1864	2243	2652	0.486	0.904	Peak Center found at (59117);Inject Sample No 70
70	SG-126-52	59	85950	05/29/21	08:31:17	8	389.2	7.571	1.8	2.2	3.0	1790	2154	2549	0.53	0.913	Peak Center found at (59117);Inject Sample No 70
70	SG-126-52	59	85950	05/29/21	08:31:17	9	448.7	7.276	1.8	2.2	3.0	1716	2065	2448	0.454	1.02	Peak Center found at (59117);Inject Sample No 70
70	SG-126-52	59	85950	05/29/21	08:31:17	10	508.5	7.006	1.8	2.2	3.0	1653	1990	2353	0.519	0.988	Peak Center found at (59117);Inject Sample No 70
71	SG-126-53	87	85951	05/29/21	08:43:59	1	27.2	44.428	1.3	1.6	2.2	2456	2877	3384	-27.299	-33.577	Peak Center found at (59117);Inject Sample No 71
71	SG-126-53	87	85951	05/29/21	08:43:59	2	72.9	44.686	1.6	1.9	2.7	2458	2878	3385	-27.336	-33.625	Peak Center found at (59117);Inject Sample No 71
71	SG-126-53	87	85951	05/29/21	08:43:59	3	118.7	44.694	1.6	2.0	2.7	2455	2876	3383	-27.35	-33.6	Peak Center found at (59117);Inject Sample No 71
71	SG-126-53	87	85951	05/29/21	08:43:59	4	164.5	44.728	1.7	2.1	2.8	2458	2878	3386	-27.404	-33.604	Peak Center found at (59117);Inject Sample No 71
71	SG-126-53	87	85951	05/29/21	08:43:59	5	210	9.612	1.6	1.9	2.7	2249	2702	3200	-1.24	-0.07	Peak Center found at (59117);Inject Sample No 71
71	SG-126-53	87	85951	05/29/21	08:43:59	6	269.8	9.608	1.8	2.2	3.0	2253	2707	3212	-1.097	0.474	Peak Center found at (59117);Inject Sample No 71
71	SG-126-53	87	85951	05/29/21	08:43:59	7	329.4	9.192	1.9	2.3	3.2	2161	2597	3075	-1.142	0.402	Peak Center found at (59117);Inject Sample No 71
71	SG-126-53	87	85951	05/29/21	08:43:59	8	389.2	8.815	1.9	2.3	3.2	2078	2498	2957	-1.142	0.266	Peak Center found at (59117);Inject Sample No 71
71	SG-126-53	87	85951	05/29/21	08:43:59	9	448.9	8.466	1.9	2.3	3.2	1993	2394	2841	-1.17	0.332	Peak Center found at (59117);Inject Sample No 71
71	SG-126-53	87	85951	05/29/21	08:43:59	10	508.5	8.134	1.9	2.3	3.1	1918	2304	2728	-1.102	0.453	Peak Center found at (59117);Inject Sample No 71
72	SG-126-54	81	85952	05/29/21	08:56:36	1	27.2	44.412	1.3	1.6	2.2	2454	2874	3380	-27.301	-33.556	Peak Center found at (59117);Inject Sample No 72
72	SG-126-54	81	85952	05/29/21	08:56:36	2	72.9	44.641	1.6	1.9	2.7	2449	2868	3374	-27.355	-33.628	Peak Center found at (59117);Inject Sample No 72
72	SG-126-54	81	85952	05/29/21	08:56:36	3	118.7	44.692	1.7	2.0	2.7	2458	2878	3385	-27.35	-33.6	Peak Center found at (59117);Inject Sample No 72
72	SG-126-54	81	85952	05/29/21	08:56:36	4	164.5	44.682	1.7	2.1	2.8	2457	2876	3384	-27.388	-33.598	Peak Center found at (59117);Inject Sample No 72
72	SG-126-54	81	85952	05/29/21	08:56:36	5	210	11.905	1.6	1.9	2.7	2775	3336	3948	-0.208	-0.084	Peak Center found at (59117);Inject Sample No 72
72	SG-126-54	81	85952	05/29/21	08:56:36	6	269.8	11.885	2.0	2.4	3.2	2782	3346	3966	-0.127	0.356	Peak Center found at (59117);Inject Sample No 72
72	SG-126-54	81	85952	05/29/21	08:56:36	7	329.4	11.377	2.0	2.5	3.4	2671	3213	3807	-0.216	0.249	Peak Center found at (59117);Inject Sample No 72
72	SG-126-54	81	85952	05/29/21	08:56:36	8	389.2	10.921	2.1	2.6	3.5	2575	3096	3664	-0.285	0.171	Peak Center found at (59117);Inject Sample No 72
72	SG-126-54	81	85952	05/29/21	08:56:36	9	448.7	10.489	2.1	2.5	3.5	2472	2973	3520	-0.187	0.176	Peak Center found at (59117);Inject Sample No 72
72	SG-126-54	81	85952	05/29/21	08:56:36	10	508.5	10.092	2.1	2.5	3.4	2380	2862	3386	-0.194	0.263	Peak Center found at (59117);Inject Sample No 72
73	SG-126-55	94	85953	05/29/21	09:09:12	1	27.2	44.493	1.4	1.7	2.4	2458	2878	3385	-27.275	-33.594	Peak Center found at (59117);Inject Sample No 73
73	SG-126-55	94	85953	05/29/21	09:09:12	2	72.9	44.784	1.6	2.0	2.8	2460	2881	3389	-27.33	-33.605	Peak Center found at (59117);Inject Sample No 73
73	SG-126-55	94	85953	05/29/21	09:09:12	3	118.7	44.843	1.7	2.0	2.8	2463	2884	3393	-27.35	-33.6	Peak Center found at (59117);Inject Sample No 73
73	SG-126-55	94	85953	05/29/21	09:09:12	4	164.5	44.811	1.7	2.1	2.9	2461	2882	3391	-27.359	-33.605	Peak Center found at (59117);Inject Sample No 73
73	SG-126-55	94	85953	05/29/21	09:09:12	5	210	7.196	1.7	2.0	2.8	1693	2033	2408	-1.67	-0.366	Peak Center found at (59117);Inject Sample No 73
73	SG-126-55	94	85953	05/29/21	09:09:12	6	269.8	7.191	1.8	2.2	3.1	1691	2031	2410	-1.448	-0.071	Peak Center found at (59117);Inject Sample No 73
73	SG-126-55	94	85953	05/29/21	09:09:12	7	329.4	6.891	1.8	2.2	3.1	1626	1952	2310	-1.481	-0.075	Peak Center found at (59117);Inject Sample No 73
73	SG-126-55	94	85953	05/29/21	09:09:12	8	389.2	6.631	1.8	2.2	3.1	1567	1882	2230	-1.603	0.087	Peak Center found at (59117);Inject Sample No 73
73	SG-126-55	94	85953	05/29/21	09:09:12	9	448.7	6.377	1.8	2.2	3.1	1506	1809	2145	-1.508	-0.023	Peak Center found at (59117);Inject Sample No 73
73	SG-126-55	94	85953	05/29/21	09:09:12	10	508.5	6.15	1.8	2.2	3.1	1453	1745	2067	-1.494	-0.014	Peak Center found at (59117);Inject Sample No 73
74	SG-126-9-2	94	85954	05/29/21	09:21:50	1	27.2	44.604	1.3	1.6	2.3	2464	2885	3393	-27.29	-33.607	Peak Center found at (59117);Inject Sample No 74
74	SG-126-9-2	94	85954	05/29/21	09:21:50	2	72.9	44.804	1.6	2.0	2.7	2462	2883	3391	-27.342	-33.617	Peak Center found at (59117);Inject Sample No 74
74	SG-126-9-2	94	85954	05/29/21	09:21:50	3	118.7	44.809	1.7	2.0	2.8	2465	2885	3395	-27.35	-33.6	Peak Center found at (59117);Inject Sample No 74
74	SG-126-9-2	94	85954	05/29/21	09:21:50	4	164.5	44.772	1.7	2.1	2.8	2461	2882	3391	-27.356	-33.568	Peak Center found at (59117);Inject Sample No 74
74	SG-126-9-2	94	85954	05/29/21	09:21:50	5	210	12.652	1.7	2.0	2.9	2972	3575	4234	-0.005	1.436	Peak Center found at (59117);Inject Sample No 74
74	SG-126-9-2	94	85954	05/29/21	09:21:50	6	269.8	12.657	2.0	2.5	3.6	2968	3570	4235	0.144	1.841	Peak Center found at (59117);Inject Sample No 74
74	SG-126-9-2	94	85954	05/29/21	09:21:50	7	329.4	12.176	2.2	2.6	3.8	2861	3443	4080	0.136	1.805	Peak Center found at (59117);Inject Sample No 74
74	SG-126-9-2	94	85954	05/29/21	09:21:50	8	389.2	11.71	2.2	2.7	3.8	2758	3317	3929	0.112	1.846	Peak Center found at (59117);Inject Sample No 74
74	SG-126-9-2	94	85954	05/29/21	09:21:50	9	448.9	11.275	2.2	2.7	3.8	2655	3193	3791	0.188	1.945	Peak Center found at (59117);Inject Sample No 74
74	SG-126-9-2	94	85954	05/29/21	09:21:50	10	508.5	10.861	2.2	2.7	3.9	2558	3078	3642	0.122	1.903	Peak Center found at (59117);Inject Sample No 74
75	naxos-9	66	85955	05/29/21	09:34:28	1	27.2	44.483	1.4	1.7	2.5	2456	2876	3383	-27.275	-33.559	Peak Center found at (59117);Inject Sample No 75
75	naxos-9	66	85955	05/29/21	09:34:28	2	72.9	44.797	1.7	2.0	2.9	2457	2877	3385	-27.327	-33.56	Peak Center found at (59117);Inject Sample No 75
75	naxos-9	66	85955	05/29/21	09:34:28	3	118.7	44.756	1.7	2.1	3.0	2458	2878	3386	-27.35	-33.6	Peak Center found at (59117);Inject Sample No 75
75	naxos-9	66	85955	05/29/21	09:34:28	4	164.5	44.743	1.7	2.1	3.0	2460	2881	3389	-27.332	-33.58	Peak Center found at (59117);Inject Sample No 75
75	naxos-9	66	85955	05/29/21	09:34:28	5	210	9.78	1.6	2.0	2.9	2290	2758	3231	2.103	-7.739	Peak Center found at (59117);Inject Sample No 75
75	naxos-9	66	85955	05/29/21	09:34:28	6	269.8	9.778	1.9	2.3	3.3	2291	2761	3239	2.362	-7.39	Peak Center found at (59117);Inject Sample No 75
75	naxos-9	66	85955	05/29/21	09:34:28	7	329.4	9.369	2.0	2.4	3.3	2201	2653	3109	2.334	-7.2	Peak Center found at (59117);Inject Sample No 75
75	naxos-9	66	85955	05/29/21	09:34:28	8	389.2	8.983	2.0	2.4	3.4	2119	2553	2991	2.381	-7.454	Peak Center found at (59117);Inject Sample No 75
75	naxos-9	66	85955	05/29/21	09:34:28	9	448.7	8.624	2.0	2.4	3.4	2033	2450	2876	2.424	-7.325	Peak Center found at (59117);Inject Sample No 75
75	naxos-9	66	85955	05/29/21	09:34:28	10	508.5	8.293	2.0	2.4	3.3	1959	2361	2764	2.407	-7.351	Peak Center found at (59117);Inject Sample No 75
76	SG-126-19-2	82	85956	05/29/21	09:47:05	1	27.2	44.458	1.3	1.6	2.4	2459	2880	3388	-27.287	-33.579	Peak Center found at (59117);Inject Sample No 76
76	SG-126-19-2	82	85956	05/29/21	09:47:05	2	72.9	44.732	1.6	2.0	2.8	2460	2881	3389	-27.328	-33.571	Peak Center found at (59117);Inject Sample No 76
76	SG-126-19-2	82	85956	05/29/21	09:47:05	3	118.7	44.775	1.7	2.0	2.9	2463	2884	3392	-27.35	-33.6	Peak Center found at (59117);Inject Sample No 76
76	SG-126-19-2	82	85956	05/29/21	09:47:05	4	164.5	44.688	1.7	2.1	3.0	2450	2869	3375	-27.376	-33.634	Peak Center found at (59117);Inject Sample No 76
76	SG-126-19-2	82	85956	05/29/21	09:47:05	5	210	9.755	1.6	1.9	2.8	2281	2744	3243	0.428	-0.04	Peak Center found at (59117);Inject Sample No 76
76	SG-126-19-2	82	85956	05/29/21	09:47:05	6	269.8	9.744	1.9	2.3	3.2	2281	2745	3251	0.465	0.26	Peak Center found at (59117);Inject Sample No 76
76	SG-126-19-2	82	85956	05/29/21	09:47:05	7	329.4	9.328	1.9	2.4	3.3	2192	2639	3119	0.519	0.351	Peak Center found at (59117);Inject Sample No 76
76	SG-126-19-2	82	85956	05/29/21	09:47:05	8	389.2	8.931	2.0	2.4	3.3	2108	2536	3001	0.517	0.328	Peak Center found at (59117);Inject Sample No 76
76	SG-126-19-2	82	85956	05/29/21	09:47:05	9	448.7	8.579	2.0	2.4	3.3	2023	2435	2884	0.538	0.474	Peak Center found at (59117);Inject Sample No 76
76	SG-126-19-2	82	85956	05/29/21	09:47:05	10	508.5	8.245	2.0	2.4	3.3	1948	2344	2772	0.577	0.396	Peak Center found at (59117);Inject Sample No 76
77	SG-126-28-2	96	85957	05/29/21	09:59:40	1	27.2	44.393	1.3	1.6	2.4	2456	2876	3383	-27.272	-33.524	Peak Center found at (59117);Inject Sample No 77
77	SG-126-28-2	96	85957	05/29/21	09:59:40	2	72.9	44.642	1.6	2.0	2.8	2455	2875	3382	-27.341	-33.586	Peak Center found at (59117);Inject Sample No 77
77	SG-126-28-2	96	85957	05/29/21	09:59:40	3	118.7	44.709	1.7	2.1	2.9	2456	2876	3384	-27.35	-33.6	Peak Center found at (59117);Inject Sample No 77
77	SG-126-28-2	96	85957	05/29/21	09:59:40	4	164.5	44.669	1.7	2.1	2.9	2453	2872	3379	-27.337	-33.579	Peak Center found at (59117);Inject Sample No 77
77	SG-126-28-2	96	85957	05/29/21	09:59:40	5	210	16.605	1.6	2.0	2.8	3871	4661	5506	1.093	-0.543	Peak Center found at (59117);Inject Sample No 77
77	SG-126-28-2	96	85957	05/29/21	09:59:40	6	269.6	16.589	2.2	2.6	3.6	3878	4670	5521	1.219	-0.13	Peak Center found at (59117);Inject Sample No 77
77	SG-126-28-2	96	85957	05/29/21	09:59:40	7	329.4	15.883	2.3	2.8	3.8	3725	4485	5295	1.235	-0.119	Peak Center found at (59117);Inject Sample No 77
77	SG-126-28-2	96	85957	05/29/21	09:59:40	8	389.2	15.214	2.4	2.9	3.9	3577	4306	5093	1.223	-0.147	Peak Center found at (59117);Inject Sample No 77
77	SG-126-28-2	96	85957	05/29/21	09:59:40	9	448.7	14.594	2.4	2.9	3.9	3438	4141	4892	1.18	-0.103	Peak Center found at (59117);Inject Sample No 77
77	SG-126-28-2	96	85957	05/29/21	09:59:40	10	508.5	14.014	2.4	2.9	4.0	3305	3980	4705	1.234	-0.088	Peak Center found at (59117);Inject Sample No 77
78	SG-126-39-2	72	85958	05/29/21	10:12:17	1	27.2	44.333	1.4	1.7	2.5	2452	2871	3378	-27.24	-33.607	Peak Center found at (59117);Inject Sample No 78
78	SG-126-39-2	72	85958	05/29/21	10:12:17	2	72.9	44.577	1.7	2.1	2.9	2453	2872	3378	-27.307	-33.619	Peak Center found at (59117);Inject Sample No 78
78	SG-126-39-2	72	85958	05/29/21	10:12:17	3	118.7	44.584	1.7	2.1	2.9	2451	2870	3376	-27.35	-33.6	Peak Center found at (59117);Inject Sample No 78
78	SG-126-39-2	72	85958	05/29/21	10:12:17	4	164.5	44.588	1.7	2.1	3.0	2452	2870	3377	-27.36	-33.608	Peak Center found at (59117);Inject Sample No 78
78	SG-126-39-2	72	85958	05/29/21	10:12:17	5	209.8	8.986	1.7	2.1	3.2	2117	2548	3020	0.36	0.938	Peak Center found at (59117);Inject Sample No 78
78	SG-126-39-2	72	85958	05/29/21	10:12:17	6	269.6	8.929	2.0	2.4	3.6	2102	2529	2992	0.565	1.233	Peak Center found at (59117);Inject Sample No 78
78	SG-126-39-2	72	85958	05/29/21	10:12:17	7	329.4	8.605	2.0	2.5	3.8	2025	2436	2884	0.489	1.323	Peak Center found at (59117);Inject Sample No 78
78	SG-126-39-2	72	85958	05/29/21	10:12:17	8	389.2	8.268	2.0	2.5	3.8	1945	2340	2774	0.543	1.339	Peak Center found at (59117);Inject Sample No 78
78	SG-126-39-2	72	85958	05/29/21	10:12:17	9	448.7	7.945	2.0	2.5	3.9	1873	2254	2665	0.562	1.357	Peak Center found at (59117);Inject Sample No 78
78	SG-126-39-2	72	85958	05/29/21	10:12:17	10	508.5	7.648	2.0	2.5	3.9	1802	2168	2570	0.555	1.427	Peak Center found at (59117);Inject Sample No 78
79	SG-126-49-2	85	85959	05/29/21	10:24:53	1	27.2	44.264	1.4	1.7	2.7	2446	2864	3369	-27.279	-33.613	Peak Center found at (59117);Inject Sample No 79
79	SG-126-49-2	85	85959	05/29/21	10:24:53	2	72.9	44.625	1.6	2.0	3.0	2451	2870	3376	-27.324	-33.616	Peak Center found at (59117);Inject Sample No 79
79	SG-126-49-2	85	85959	05/29/21	10:24:53	3	118.7	44.562	1.7	2.1	3.1	2449	2867	3373	-27.35	-33.6	Peak Center found at (59117);Inject Sample No 79
79	SG-126-49-2	85	85959	05/29/21	10:24:53	4	164.5	44.552	1.7	2.1	3.1	2448	2866	3373	-27.366	-33.628	Peak Center found at (59117);Inject Sample No 79
79	SG-126-49-2	85	85959	05/29/21	10:24:53	5	210	11.087	1.6	2.0	3.0	2581	3105	3680	-0.073	0.254	Peak Center found at (59117);Inject Sample No 79
79	SG-126-49-2	85	85959	05/29/21	10:24:53	6	269.6	11.091	1.9	2.3	3.4	2598	3124	3695	0.162	0.582	Peak Center found at (59117);Inject Sample No 79
79	SG-126-49-2	85	85959	05/29/21	10:24:53	7	329.4	10.576	2.0	2.4	3.6	2486	2990	3541	0.184	0.65	Peak Center found at (59117);Inject Sample No 79
79	SG-126-49-2	85	85959	05/29/21	10:24:53	8	388.9	10.127	2.0	2.5	3.6	2386	2870	3398	0.14	0.533	Peak Center found at (59117);Inject Sample No 79
79	SG-126-49-2	85	85959	05/29/21	10:24:53	9	448.7	9.727	2.0	2.5	3.5	2294	2760	3265	0.11	0.747	Peak Center found at (59117);Inject Sample No 79
79	SG-126-49-2	85	85959	05/29/21	10:24:53	10	508.5	9.319	2.0	2.5	3.5	2200	2646	3137	0.118	0.687	Peak Center found at (59117);Inject Sample No 79
80	SG-127-1	64	85960	05/29/21	10:37:21	1	27.2	44.18	1.4	1.7	2.6	2440	2857	3361	-27.203	-33.493	Peak Center found at (59117);Inject Sample No 80
80	SG-127-1	64	85960	05/29/21	10:37:21	2	72.9	44.374	1.6	2.0	3.0	2441	2858	3362	-27.241	-33.558	Peak Center found at (59117);Inject Sample No 80
80	SG-127-1	64	85960	05/29/21	10:37:21	3	118.7	44.467	1.7	2.1	3.0	2443	2861	3365	-27.35	-33.6	Peak Center found at (59117);Inject Sample No 80
80	SG-127-1	64	85960	05/29/21	10:37:21	4	164.5	44.474	1.7	2.1	3.1	2444	2862	3367	-27.342	-33.599	Peak Center found at (59117);Inject Sample No 80
80	SG-127-1	64	85960	05/29/21	10:37:21	5	209.8	9.224	1.7	2.0	3.0	2170	2613	3088	1.271	0.219	Peak Center found at (59117);Inject Sample No 80
80	SG-127-1	64	85960	05/29/21	10:37:21	6	269.6	9.204	1.9	2.3	3.3	2167	2610	3089	1.465	0.614	Peak Center found at (59117);Inject Sample No 80
80	SG-127-1	64	85960	05/29/21	10:37:21	7	329.2	8.869	1.9	2.3	3.4	2090	2517	2975	1.448	0.491	Peak Center found at (59117);Inject Sample No 80
80	SG-127-1	64	85960	05/29/21	10:37:21	8	388.9	8.506	1.9	2.4	3.5	2010	2420	2859	1.414	0.525	Peak Center found at (59117);Inject Sample No 80
80	SG-127-1	64	85960	05/29/21	10:37:21	9	448.7	8.188	1.9	2.4	3.5	1932	2326	2753	1.535	0.615	Peak Center found at (59117);Inject Sample No 80
80	SG-127-1	64	85960	05/29/21	10:37:21	10	508.3	7.869	1.9	2.4	3.4	1862	2241	2649	1.453	0.688	Peak Center found at (59117);Inject Sample No 80
81	SG-127-2	55	85961	05/29/21	10:49:59	1	27.2	44.139	1.3	1.7	2.5	2444	2862	3367	-27.272	-33.579	Peak Center found at (59117);Inject Sample No 81
81	SG-127-2	55	85961	05/29/21	10:49:59	2	72.9	44.459	1.6	2.0	3.0	2443	2860	3365	-27.316	-33.6	Peak Center found at (59117);Inject Sample No 81
81	SG-127-2	55	85961	05/29/21	10:49:59	3	118.7	44.441	1.7	2.0	3.0	2441	2858	3362	-27.35	-33.6	Peak Center found at (59117);Inject Sample No 81
81	SG-127-2	55	85961	05/29/21	10:49:59	4	164.5	44.49	1.7	2.1	3.0	2446	2864	3368	-27.355	-33.599	Peak Center found at (59117);Inject Sample No 81
81	SG-127-2	55	85961	05/29/21	10:49:59	5	209.8	7.335	1.6	2.0	3.0	1731	2082	2464	0.634	-0.377	Peak Center found at (59117);Inject Sample No 81
81	SG-127-2	55	85961	05/29/21	10:49:59	6	269.4	7.334	1.8	2.2	3.2	1732	2084	2464	0.789	0.003	Peak Center found at (59117);Inject Sample No 81
81	SG-127-2	55	85961	05/29/21	10:49:59	7	329.2	7.036	1.8	2.2	3.2	1664	2003	2367	0.725	0.182	Peak Center found at (59117);Inject Sample No 81
81	SG-127-2	55	85961	05/29/21	10:49:59	8	388.9	6.758	1.8	2.2	3.2	1599	1924	2277	0.845	0.157	Peak Center found at (59117);Inject Sample No 81
81	SG-127-2	55	85961	05/29/21	10:49:59	9	448.5	6.492	1.8	2.2	3.2	1538	1851	2186	0.861	0.242	Peak Center found at (59117);Inject Sample No 81
81	SG-127-2	55	85961	05/29/21	10:49:59	10	508.3	6.238	1.8	2.2	3.3	1481	1783	2108	0.942	0.148	Peak Center found at (59117);Inject Sample No 81
82	SG-127-3	83	85962	05/29/21	11:02:35	1	27.2	44.183	1.3	1.6	2.4	2442	2860	3364	-27.258	-33.561	Peak Center found at (59117);Inject Sample No 82
82	SG-127-3	83	85962	05/29/21	11:02:35	2	72.9	44.435	1.6	2.0	2.8	2442	2859	3364	-27.339	-33.571	Peak Center found at (59117);Inject Sample No 82
82	SG-127-3	83	85962	05/29/21	11:02:35	3	118.7	44.407	1.6	2.0	2.9	2440	2857	3360	-27.35	-33.6	Peak Center found at (59117);Inject Sample No 82
82	SG-127-3	83	85962	05/29/21	11:02:35	4	164.5	44.503	1.7	2.1	3.0	2444	2862	3367	-27.364	-33.619	Peak Center found at (59117);Inject Sample No 82
82	SG-127-3	83	85962	05/29/21	11:02:35	5	209.6	12.562	1.6	2.0	3.0	2958	3561	4214	0.909	-0.019	Peak Center found at (59117);Inject Sample No 82
82	SG-127-3	83	85962	05/29/21	11:02:35	6	269.4	12.555	2.0	2.4	3.5	2960	3563	4208	1.09	0.298	Peak Center found at (59117);Inject Sample No 82
82	SG-127-3	83	85962	05/29/21	11:02:35	7	329.2	12.089	2.1	2.6	3.7	2853	3435	4062	1.053	0.335	Peak Center found at (59117);Inject Sample No 82
82	SG-127-3	83	85962	05/29/21	11:02:35	8	388.7	11.613	2.1	2.6	3.7	2742	3302	3905	1.138	0.43	Peak Center found at (59117);Inject Sample No 82
82	SG-127-3	83	85962	05/29/21	11:02:35	9	448.5	11.187	2.1	2.6	3.7	2645	3184	3765	1.077	0.479	Peak Center found at (59117);Inject Sample No 82
82	SG-127-3	83	85962	05/29/21	11:02:35	10	508.1	10.738	2.1	2.6	3.7	2540	3058	3621	1.076	0.523	Peak Center found at (59117);Inject Sample No 82
83	SG-127-4	55	85963	05/29/21	11:15:10	1	27.2	44.067	1.4	1.7	2.5	2434	2850	3353	-27.28	-33.553	Peak Center found at (59117);Inject Sample No 83
83	SG-127-4	55	85963	05/29/21	11:15:10	2	72.9	44.372	1.6	2.0	2.9	2438	2854	3358	-27.33	-33.583	Peak Center found at (59117);Inject Sample No 83
83	SG-127-4	55	85963	05/29/21	11:15:10	3	118.7	44.396	1.7	2.1	3.0	2439	2856	3360	-27.35	-33.6	Peak Center found at (59117);Inject Sample No 83
83	SG-127-4	55	85963	05/29/21	11:15:10	4	164.5	44.387	1.7	2.1	3.1	2437	2853	3357	-27.353	-33.58	Peak Center found at (59117);Inject Sample No 83
83	SG-127-4	55	85963	05/29/21	11:15:10	5	209.6	8.353	1.6	2.0	2.9	1972	2374	2805	1.069	0.08	Peak Center found at (59117);Inject Sample No 83
83	SG-127-4	55	85963	05/29/21	11:15:10	6	269.4	8.322	1.8	2.3	3.2	1966	2367	2798	1.116	0.539	Peak Center found at (59117);Inject Sample No 83
83	SG-127-4	55	85963	05/29/21	11:15:10	7	329.2	7.987	1.9	2.3	3.3	1886	2271	2689	1.188	0.618	Peak Center found at (59117);Inject Sample No 83
83	SG-127-4	55	85963	05/29/21	11:15:10	8	388.7	7.663	1.9	2.3	3.3	1815	2186	2581	1.234	0.518	Peak Center found at (59117);Inject Sample No 83
83	SG-127-4	55	85963	05/29/21	11:15:10	9	448.5	7.364	1.9	2.3	3.3	1743	2099	2485	1.295	0.618	Peak Center found at (59117);Inject Sample No 83
83	SG-127-4	55	85963	05/29/21	11:15:10	10	508.1	7.089	1.9	2.3	3.3	1680	2023	2389	1.232	0.661	Peak Center found at (59117);Inject Sample No 83
84	SG-127-5	84	85964	05/29/21	11:27:46	1	27.2	44.081	1.3	1.7	2.5	2438	2855	3359	-27.278	-33.541	Peak Center found at (59117);Inject Sample No 84
84	SG-127-5	84	85964	05/29/21	11:27:46	2	72.9	44.337	1.6	2.0	2.9	2436	2853	3356	-27.328	-33.592	Peak Center found at (59117);Inject Sample No 84
84	SG-127-5	84	85964	05/29/21	11:27:46	3	118.7	44.386	1.7	2.0	3.0	2435	2851	3354	-27.35	-33.6	Peak Center found at (59117);Inject Sample No 84
84	SG-127-5	84	85964	05/29/21	11:27:46	4	164.5	44.357	1.7	2.1	3.0	2435	2852	3355	-27.349	-33.598	Peak Center found at (59117);Inject Sample No 84
84	SG-127-5	84	85964	05/29/21	11:27:46	5	209.6	9.687	1.7	2.0	3.1	2298	2766	3273	0.997	1.176	Peak Center found at (59117);Inject Sample No 84
84	SG-127-5	84	85964	05/29/21	11:27:46	6	269.4	9.665	1.9	2.3	3.5	2290	2756	3267	1.188	1.493	Peak Center found at (59117);Inject Sample No 84
84	SG-127-5	84	85964	05/29/21	11:27:46	7	329	9.314	2.0	2.4	3.6	2207	2658	3143	1.156	1.538	Peak Center found at (59117);Inject Sample No 84
84	SG-127-5	84	85964	05/29/21	11:27:46	8	388.7	8.976	2.0	2.5	3.7	2129	2563	3031	1.148	1.518	Peak Center found at (59117);Inject Sample No 84
84	SG-127-5	84	85964	05/29/21	11:27:46	9	448.5	8.645	2.0	2.5	3.7	2047	2464	2920	1.093	1.598	Peak Center found at (59117);Inject Sample No 84
84	SG-127-5	84	85964	05/29/21	11:27:46	10	508.1	8.325	2.0	2.5	3.8	1971	2374	2806	1.19	1.575	Peak Center found at (59117);Inject Sample No 84
85	Kiel Carbo d	84	85965	05/29/21	11:40:23	1	27.2	44.056	1.4	1.8	2.7	2432	2846	3347	-27.312	-33.633	Peak Center found at (59112);Inject Sample No 85
85	Kiel Carbo d	84	85965	05/29/21	11:40:23	2	72.9	44.337	1.7	2.1	3.0	2438	2853	3357	-27.372	-33.648	Peak Center found at (59112);Inject Sample No 85
85	Kiel Carbo d	84	85965	05/29/21	11:40:23	3	118.7	44.277	1.7	2.1	3.1	2432	2846	3349	-27.35	-33.6	Peak Center found at (59112);Inject Sample No 85
85	Kiel Carbo d	84	85965	05/29/21	11:40:23	4	164.5	44.288	1.7	2.1	3.2	2429	2843	3344	-27.379	-33.676	Peak Center found at (59112);Inject Sample No 85
85	Kiel Carbo d	84	85965	05/29/21	11:40:23	5	209.6	7.142	1.7	2.0	3.0	1690	1964	2362	-34.681	-16.991	Peak Center found at (59112);Inject Sample No 85
85	Kiel Carbo d	84	85965	05/29/21	11:40:23	6	269.2	7.155	1.8	2.2	3.3	1694	1970	2371	-34.671	-16.714	Peak Center found at (59112);Inject Sample No 85
85	Kiel Carbo d	84	85965	05/29/21	11:40:23	7	329	6.839	1.8	2.2	3.3	1622	1886	2267	-34.681	-16.763	Peak Center found at (59112);Inject Sample No 85
85	Kiel Carbo d	84	85965	05/29/21	11:40:23	8	388.7	6.568	1.8	2.2	3.3	1560	1814	2182	-34.708	-16.593	Peak Center found at (59112);Inject Sample No 85
85	Kiel Carbo d	84	85965	05/29/21	11:40:23	9	448.3	6.304	1.8	2.3	3.3	1497	1740	2094	-34.81	-16.653	Peak Center found at (59112);Inject Sample No 85
85	Kiel Carbo d	84	85965	05/29/21	11:40:23	10	508.1	6.054	1.8	2.2	3.2	1440	1675	2014	-34.669	-16.517	Peak Center found at (59112);Inject Sample No 85
86	naxos-10	112	85966	05/29/21	11:53:02	1	27.2	44.029	1.3	1.7	2.5	2431	2847	3349	-27.232	-33.54	Peak Center found at (59117);Inject Sample No 86
86	naxos-10	112	85966	05/29/21	11:53:02	2	72.9	44.238	1.6	2.0	2.9	2433	2849	3352	-27.313	-33.578	Peak Center found at (59117);Inject Sample No 86
86	naxos-10	112	85966	05/29/21	11:53:02	3	118.7	44.299	1.7	2.1	3.0	2432	2849	3351	-27.35	-33.6	Peak Center found at (59117);Inject Sample No 86
86	naxos-10	112	85966	05/29/21	11:53:02	4	164.5	44.239	1.7	2.1	3.1	2433	2849	3351	-27.352	-33.58	Peak Center found at (59117);Inject Sample No 86
86	naxos-10	112	85966	05/29/21	11:53:02	5	209.4	21.161	1.7	2.1	3.0	4998	6023	7068	2.09	-7.779	Peak Center found at (59117);Inject Sample No 86
86	naxos-10	112	85966	05/29/21	11:53:02	6	269.2	21.164	2.4	2.9	4.0	5005	6033	7065	2.342	-7.412	Peak Center found at (59117);Inject Sample No 86
86	naxos-10	112	85966	05/29/21	11:53:02	7	329	20.43	2.6	3.2	4.4	4830	5822	6819	2.375	-7.336	Peak Center found at (59117);Inject Sample No 86
86	naxos-10	112	85966	05/29/21	11:53:02	8	388.7	19.652	2.7	3.3	4.5	4647	5601	6570	2.363	-7.356	Peak Center found at (59117);Inject Sample No 86
86	naxos-10	112	85966	05/29/21	11:53:02	9	448.3	18.938	2.7	3.3	4.6	4478	5399	6323	2.356	-7.339	Peak Center found at (59117);Inject Sample No 86
86	naxos-10	112	85966	05/29/21	11:53:02	10	508.1	18.215	2.7	3.3	4.6	4313	5197	6092	2.375	-7.288	Peak Center found at (59117);Inject Sample No 86
87	naxos-11	80	85967	05/29/21	12:05:37	1	27.2	43.968	1.5	1.9	2.8	2429	2845	3347	-27.258	-33.575	Peak Center found at (59117);Inject Sample No 87
87	naxos-11	80	85967	05/29/21	12:05:37	2	72.9	44.222	1.8	2.2	3.2	2431	2847	3350	-27.333	-33.633	Peak Center found at (59117);Inject Sample No 87
87	naxos-11	80	85967	05/29/21	12:05:37	3	118.7	44.192	1.8	2.3	3.2	2431	2847	3348	-27.35	-33.6	Peak Center found at (59117);Inject Sample No 87
87	naxos-11	80	85967	05/29/21	12:05:37	4	164.5	44.256	1.8	2.3	3.3	2428	2844	3346	-27.377	-33.648	Peak Center found at (59117);Inject Sample No 87
87	naxos-11	80	85967	05/29/21	12:05:37	5	209.4	15.528	1.7	2.1	3.2	3676	4430	5193	2.145	-7.969	Peak Center found at (59117);Inject Sample No 87
87	naxos-11	80	85967	05/29/21	12:05:37	6	269.2	15.502	2.2	2.7	3.8	3673	4427	5183	2.26	-7.412	Peak Center found at (59117);Inject Sample No 87
87	naxos-11	80	85967	05/29/21	12:05:37	7	329	14.935	2.4	2.9	4.0	3535	4260	4993	2.271	-7.407	Peak Center found at (59117);Inject Sample No 87
87	naxos-11	80	85967	05/29/21	12:05:37	8	388.5	14.358	2.4	3.0	4.1	3398	4096	4806	2.291	-7.482	Peak Center found at (59117);Inject Sample No 87
87	naxos-11	80	85967	05/29/21	12:05:37	9	448.3	13.838	2.4	3.0	4.1	3280	3953	4630	2.291	-7.41	Peak Center found at (59117);Inject Sample No 87
87	naxos-11	80	85967	05/29/21	12:05:37	10	508.1	13.297	2.4	3.0	4.1	3156	3802	4462	2.266	-7.317	Peak Center found at (59117);Inject Sample No 87

## Sheet: results
Sample	δ13C [‰]	δ18O [‰]		weight [μg]	Ampl 44 [mV]
naxos-1	2.11967	-6.72542		113	6023
naxos-2	1.85247	-6.86884		85	3847
Kiel Carbo a	-35.0311	-15.8552		62	2672
SG-126-1	1.06807	3.29465		59	1521
SG-126-3	0.404867	1.68889		58	1178
SG-126-4	0.543467	1.10257		52	1921
SG-126-5	0.837067	0.761273		90	3002
SG-126-6	0.795667	0.895107		53	1594
SG-126-7	0.745067	1.29202		62	2301
SG-126-8	0.574067	1.78233		66	2024
SG-126-9	0.302467	2.85812		99	4003
SG-126-10	0.0608667	1.60824		62	1306
naxos-3	2.06887	-6.78375		120	4759
SG-126-11	0.163067	0.961468		66	2152
SG-126-12	0.0622667	1.36566		62	1937
SG-126-13	-0.258733	0.906213		71	2802
SG-126-14	0.633467	1.27001		89	3578
SG-126-15	0.723667	1.20875		64	1177
SG-126-16	0.928867	3.06532		79	3174
SG-126-17	0.875667	2.58986		118	4907
SG-126-18	0.472467	1.53853		74	2800
naxos-4	2.04407	-6.88361		84	2097
Kiel Carbo b	-35.1689	-15.9254		75	3271
SG-126-19	0.196467	1.04721		73	3042
SG-126-20	0.794467	0.598581		72	2859
SG-126-21	0.993467	0.812928		66	2867
SG-126-22	0.611467	2.22433		63	2673
SG-126-23	0.890667	2.34788		90	3411
SG-126-24	1.28107	2.03899		78	2940
SG-126-25	1.29747	1.61539		116	3469
naxos-5	2.13487	-6.76087		125	4620
SG-126-26	1.34187	1.06096		79	3071
SG-126-27	1.30287	0.817501		90	2550
SG-126-28	0.946467	0.526053		90	3214
SG-126-29	0.497467	1.72707		89	3630
SG-126-30	0.812067	2.67076		113	4750
SG-126-31	1.05907	2.31019		79	3067
SG-126-32	1.09227	1.75132		68	2271
SG-126-33	0.512667	0.870981		76	2471
naxos-6	2.13247	-6.89827		55	7202
SG-126-34	2.10927	-6.84549		60	4384	Naxos-7; switched
SG-126-35	0.605867	0.965528		108	2158
SG-126-36	0.570867	1.67727		68	3242
SG-126-37	0.827667	0.92324		99	2604
SG-126-38	1.01847	2.5368		98	3730
SG-126-39	0.626867	2.34026		77	2773
SG-126-40	0.295867	0.790198		63	2058
SG-126-41	1.08887	1.03579		72	2245
Naxos-7	-0.129933	1.7846		145	3035	SG-126-34; switched
SG-126-42	1.09187	1.4391		100	3185
SG-126-43	0.942867	1.93382		85	2890
SG-126-44	-0.162333	1.50007		71	2600
SG-126-45	-0.571333	1.21361		87	3564
SG-126-46	0.170067	1.32921		109	2333
SG-126-47	0.440267	1.39794		83	2433
SG-126-48	0.317667	1.57949		67	2067
Kiel Carbo c	-35.1655	-15.9807		113	4320
naxos-8	1.88767	-6.91317		78	3359
SG-126-49	-0.399933	1.26072		76	2137
SG-126-50	0.497067	0.572385		52	1642	low
SG-126-51	0.136067	0.304352		61	1826	low
SG-126-52	0.180267	1.56175		59	1939
SG-126-53	-1.43353	1.01334		87	2253
SG-126-54	-0.504733	0.840947		81	2782
SG-126-55	-1.80973	0.640607		94	1691	low
SG-126-9-2	-0.162533	2.4554		94	2968
naxos-9	2.07867	-6.71821		66	2291
SG-126-19-2	0.220267	0.988154		82	2281
SG-126-28-2	0.915267	0.418404		96	3878
SG-126-39-2	0.239867	1.9723		72	2102
SG-126-49-2	-0.160133	1.24818		85	2598
SG-127-1	1.16007	1.21942		64	2167
SG-127-2	0.529467	0.803882		55	1732	low
SG-127-3	0.783867	1.00085		83	2960
SG-127-4	0.910067	1.23501		55	1966
SG-127-5	0.852067	2.17024		84	2290
Kiel Carbo d	-35.0107	-15.9884		84	1694	low
naxos-10	2.05927	-6.8743		112	5005
naxos-11	1.97287	-6.85817		80	3673

## Sheet: results - expanded
Sample	δ13C [‰]	δ18O [‰]		weight [μg]	Ampl 44 [mV]	Distance from umbo [mm]	st dev d13C [‰]	st dev d18O [‰]
SG-126-1	1.06807	3.29465		59	1521	4.02	0.070693	0.134966
SG-126-3	0.404867	1.68889		58	1178	5.99	0.0506725	0.0994585
SG-126-4	0.543467	1.10257		52	1921	6.33	0.0315325	0.0714647
SG-126-5	0.837067	0.761273		90	3002	7.4	0.0400062	0.0621989
SG-126-6	0.795667	0.895107		53	1594	7.86	0.0581919	0.0540065
SG-126-7	0.745067	1.29202		62	2301	8.19	0.0379144	0.0311801
SG-126-8	0.574067	1.78233		66	2024	8.47	0.0637652	0.0563454
SG-126-9	0.302467	2.85812		99	4003	9.01	0.0219841	0.0373336
SG-126-10	0.0608667	1.60824		62	1306	9.33	0.0605037	0.13461
SG-126-11	0.163067	0.961468		66	2152	9.81	0.0425088	0.0620701
SG-126-12	0.0622667	1.36566		62	1937	9.97	0.0268086	0.0884828
SG-126-13	-0.258733	0.906213		71	2802	10.39	0.0362933	0.0529179
SG-126-14	0.633467	1.27001		89	3578	10.98	0.0343264	0.0323527
SG-126-15	0.723667	1.20875		64	1177	11.64	0.0479406	0.124188
SG-126-16	0.928867	3.06532		79	3174	11.81	0.0837329	0.0532194
SG-126-17	0.875667	2.58986		118	4907	12.4	0.0311657	0.0247649
SG-126-18	0.472467	1.53853		74	2800	12.87	0.0226451	0.06945
SG-126-19	0.196467	1.04721		73	3042	13.03	0.0470882	0.0676314
SG-126-20	0.794467	0.598581		72	2859	13.39	0.0158209	0.0440284
SG-126-21	0.993467	0.812928		66	2867	13.87	0.0153721	0.0526279
SG-126-22	0.611467	2.22433		63	2673	14.2	0.0307539	0.0290465
SG-126-23	0.890667	2.34788		90	3411	14.9	0.0125419	0.05055
SG-126-24	1.28107	2.03899		78	2940	15.14	0.0425617	0.064923
SG-126-25	1.29747	1.61539		116	3469	15.79	0.0191259	0.07695
SG-126-26	1.34187	1.06096		79	3071	16.13	0.0343322	0.0762974
SG-126-27	1.30287	0.817501		90	2550	16.65	0.0181025	0.0491864
SG-126-28	0.946467	0.526053		90	3214	17.36	0.035557	0.0419082
SG-126-29	0.497467	1.72707		89	3630	17.84	0.0264348	0.0331919
SG-126-30	0.812067	2.67076		113	4750	18.23	0.00796869	0.0304352
SG-126-31	1.05907	2.31019		79	3067	18.8	0.0241557	0.0402902
SG-126-32	1.09227	1.75132		68	2271	19.27	0.0225433	0.0567697
SG-126-33	0.512667	0.870981		76	2471	19.56	0.0302952	0.0762286
SG-126-34	-0.129933	1.7846		60	3035	19.99	0.04	0.0699571
SG-126-35	0.605867	0.965528		108	2158	20.46	0.0294228	0.0735507
SG-126-36	0.570867	1.67727		68	3242	21.02	0.0185796	0.0345297
SG-126-37	0.827667	0.92324		99	2604	21.64	0.0456541	0.061743
SG-126-38	1.01847	2.5368		98	3730	21.89	0.0161493	0.0213378
SG-126-39	0.626867	2.34026		77	2773	22.47	0.026205	0.0304253
SG-126-40	0.295867	0.790198		63	2058	23.03	0.0683645	0.105713
SG-126-41	1.08887	1.03579		72	2245	23.31	0.0349314	0.073904
SG-126-42	1.09187	1.4391		100	3185	23.61	0.0321045	0.0443227
SG-126-43	0.942867	1.93382		85	2890	23.9	0.0486025	0.0239583
SG-126-44	-0.162333	1.50007		71	2600	24.4	0.0419202	0.0776383
SG-126-45	-0.571333	1.21361		87	3564	24.92	0.0174871	0.0473445
SG-126-46	0.170067	1.32921		109	2333	25.88	0.0553399	0.0452736
SG-126-47	0.440267	1.39794		83	2433	26.33	0.0171377	0.0729705
SG-126-48	0.317667	1.57949		67	2067	26.8	0.0555275	0.0638592
SG-126-49	-0.399933	1.26072		76	2137	27.15	0.0188547	0.0702545
SG-126-50	0.497067	0.572385		52	1642	27.6	0.0480989	0.0708781
SG-126-51	0.136067	0.304352		61	1826	27.94	0.0457275	0.0456804
SG-126-52	0.180267	1.56175		59	1939	28.16	0.0432747	0.10256
SG-126-53	-1.43353	1.01334		87	2253	28.87	0.0306562	0.086318
SG-126-54	-0.504733	0.840947		81	2782	29.01	0.0570061	0.0756274
SG-126-55	-1.80973	0.640607		94	1691	29.77	0.0581868	0.0654156
SG-126-9-2	-0.162533	2.4554		94	2968	9.01	0.0293394	0.0555338
SG-126-19-2	0.220267	0.988154		82	2281	13.03	0.040487	0.0796568
SG-126-28-2	0.915267	0.418404		96	3878	17.36	0.0224433	0.022963
SG-126-39-2	0.239867	1.9723		72	2102	22.47	0.0312442	0.069837
SG-126-49-2	-0.160133	1.24818		85	2598	27.15	0.030679	0.0845145
SG-127-1	1.16007	1.21942		64	2167	12.075	0.0444803	0.0786975
SG-127-2	0.529467	0.803882		55	1732	12.38	0.0812515	0.088155
SG-127-3	0.783867	1.00085		83	2960	13.04	0.0315706	0.0949395
SG-127-4	0.910067	1.23501		55	1966	13.61	0.0662571	0.0599808
SG-127-5	0.852067	2.17024		84	2290	13.71	0.0393954	0.0423946
